# Supplementary material for: Massive cranium from Harbin in northeastern China establishes a new Middle Pleistocene human lineage
Source: PubMed Central journal article supplement — Innovation (Camb). 2021 Aug 28;2(3):100130. doi: 10.1016/j.xinn.2021.100130 (PMC8454562; doi:10.1016/j.xinn.2021.100130), 2021-08-28
Supplement: mmc5.pdf [file mmc5.pdf]

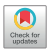

# Massive cranium from Harbin in northeastern China establishes a new Middle Pleistocene human lineage

Xijun Ni,<sup>1,2,3,4,\*</sup> Qiang Ji,<sup>1,\*</sup> Wensheng Wu,<sup>1</sup> Qingfeng Shao,<sup>5</sup> Yannan Ji,<sup>6</sup> Chi Zhang,<sup>2,4</sup> Lei Liang,<sup>1</sup> Junyi Ge,<sup>2,4</sup> Zhen Guo,<sup>1</sup> Jinhua Li,<sup>7</sup> Qiang Li,<sup>2,4</sup> Rainer Grün,<sup>8,9</sup> and Chris Stringer<sup>10,\*</sup>

\*Correspondence: jiqiang@hgu.edu.cn (Q.J.); nixijun@hgu.edu.cn (X.N.); c.stringer@nhm.ac.uk (C.S.)

Received: May 10, 2021; Accepted: June 4, 2021; Published Online: June 25, 2021; <https://doi.org/10.1016/j.xinn.2021.100130>

© 2020 The Author(s). This is an open access article under the CC BY-NC-ND license (<http://creativecommons.org/licenses/by-nc-nd/4.0/>).

## Graphical abstract

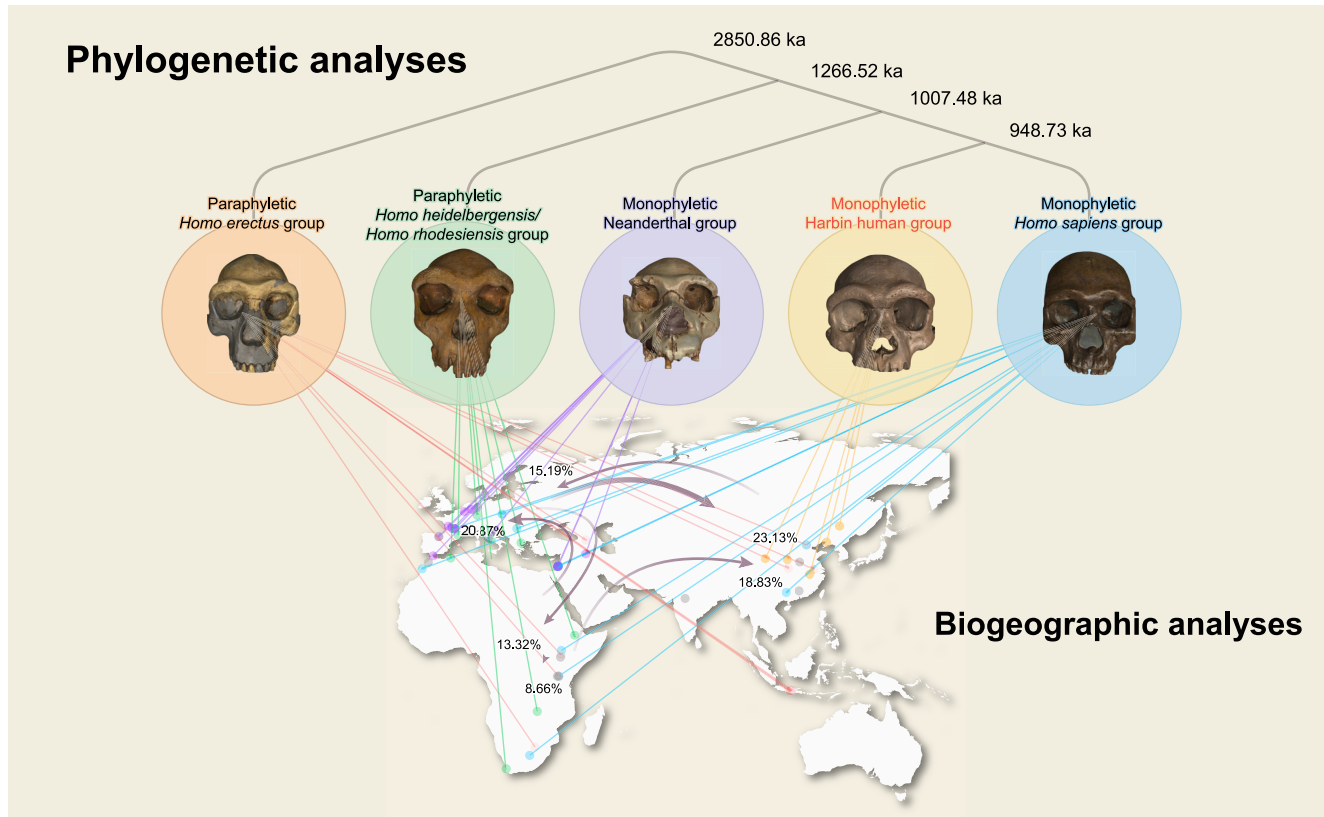

## Public summary

- More than 100,000 years ago, several human species coexisted in Asia, Europe, and Africa
- A completely preserved fossil human cranium discovered in the Harbin area provides critical evidence for understanding the evolution of humans and the origin of our species
- The Harbin cranium has a large cranial capacity (~1,420 mL) falling in the range of modern humans, but is combined with a mosaic of primitive and derived characters
- Our comprehensive phylogenetic analyses suggest that the Harbin cranium represents a new sister lineage for *Homo sapiens*
- A multi-directional “shuttle dispersal model” is more likely to explain the complex phylogenetic connections among African and Eurasian *Homo* species/populations

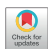

# Massive cranium from Harbin in northeastern China establishes a new Middle Pleistocene human lineage

Xijun Ni,<sup>1,2,3,4,\*</sup> Qiang Ji,<sup>1,\*</sup> Wensheng Wu,<sup>1</sup> Qingfeng Shao,<sup>5</sup> Yannan Ji,<sup>6</sup> Chi Zhang,<sup>2,4</sup> Lei Liang,<sup>1</sup> Junyi Ge,<sup>2,4</sup> Zhen Guo,<sup>1</sup> Jinhua Li,<sup>7</sup> Qiang Li,<sup>2,4</sup> Rainer Grün,<sup>8,9</sup> and Chris Stringer<sup>10,\*</sup>

<sup>1</sup>Hebei GEO University, Shijiazhuang 050031, China

<sup>2</sup>CAS Center for Excellence in Life and Paleoenvironment, Chinese Academy of Science, Beijing 100044, China

<sup>3</sup>CAS Center for Excellence in Tibetan Plateau Earth Sciences, Chinese Academy of Science, Beijing 100104, China

<sup>4</sup>University of Chinese Academy of Sciences, Beijing 100049, China

<sup>5</sup>Key Laboratory of Virtual Geographic Environment, Ministry of Education, Nanjing Normal University, Nanjing 210023, China

<sup>6</sup>China Geo-Environmental Monitoring Institute, Beijing 100081, China

<sup>7</sup>Key Laboratory of Earth and Planetary Physics, Innovation Academy for Earth Science, Chinese Academy of Sciences, Beijing 100029, China

<sup>8</sup>Australian Research Centre for Human Evolution, Griffith University, Nathan, QLD, Australia

<sup>9</sup>Research School of Earth Sciences, The Australian National University, Canberra, ACT, Australia

<sup>10</sup>Centre for Human Evolution Research, Department of Earth Sciences, Natural History Museum, London, UK

\*Correspondence: [jqiang@hgu.edu.cn](mailto:jqiang@hgu.edu.cn) (Q.J.); [nixijun@hgu.edu.cn](mailto:nixijun@hgu.edu.cn) (X.N.); [c.stringer@nhm.ac.uk](mailto:c.stringer@nhm.ac.uk) (C.S.)

Received: May 10, 2021; Accepted: June 4, 2021; Published Online: June 25, 2021; <https://doi.org/10.1016/j.xinn.2021.100130>

© 2021 The Author(s). This is an open access article under the CC BY-NC-ND license (<http://creativecommons.org/licenses/by-nc-nd/4.0/>).

Citation: Ni X., Ji Q., Wu W., et al., (2021). Massive cranium from Harbin in northeastern China establishes a new Middle Pleistocene human lineage. *The Innovation* 2(3), 100130.

It has recently become clear that several human lineages coexisted with *Homo sapiens* during the late Middle and Late Pleistocene. Here, we report an archaic human fossil that throws new light on debates concerning the diversification of the *Homo* genus and the origin of *H. sapiens*. The fossil was recovered in Harbin city in northeastern China, with a minimum uranium-series age of 146 ka. This cranium is one of the best preserved Middle Pleistocene human fossils. Its massive size, with a large cranial capacity (~1,420 mL) falling in the range of modern humans, is combined with a mosaic of primitive and derived characters. It differs from all the other named *Homo* species by presenting a combination of features, such as long and low cranial vault, a wide and low face, large and almost square orbits, gently curved but massively developed supra-orbital torus, flat and low cheekbones with a shallow canine fossa, and a shallow palate with thick alveolar bone supporting very large molars. The excellent preservation of the Harbin cranium advances our understanding of several less-complete late Middle Pleistocene fossils from China, which have been interpreted as local evolutionary intermediates between the earlier species *Homo erectus* and later *H. sapiens*. Phylogenetic analyses based on parsimony criteria and Bayesian tip-dating suggest that the Harbin cranium and some other Middle Pleistocene human fossils from China, such as those from Dali and Xiahe, form a third East Asian lineage, which is a part of the sister group of the *H. sapiens* lineage. Our analyses of such morphologically distinctive archaic human lineages from Asia, Europe, and Africa suggest that the diversification of the *Homo* genus may have had a much deeper timescale than previously presumed. Sympatric isolation of small populations combined with stochastic long-distance dispersals is the best fitting biogeographical model for interpreting the evolution of the *Homo* genus.

**Keywords:** human phylogeny; human cranium fossil; human dispersal; human diversification

## INTRODUCTION

The origin of modern humans (*Homo sapiens*, our own species) has long been a controversial topic. During the late Middle and Late Pleistocene, several human lineages, evidently at species level, coexisted with *H. sapiens* across Africa and Eurasia. These extinct hominins include *H. heidelbergensis*/*H. rhodesiensis*, *Homo naledi*, *Homo floresiensis*, *H. luzonensis*, Denisovans, Neanderthals (*Homo neanderthalensis*), and *Homo erectus*.<sup>1–5</sup> The phylogenetic relationship between these coexisting hominins and *H. sapiens* has

long been debated. Before the appearance of undoubted modern humans in Asia, some archaic fossils, such as those from Narmada, Maba, Dali, Jinniushan, Xuchang, and Hualongdong show mosaic combinations of features present in *H. erectus*, *H. heidelbergensis*/*H. rhodesiensis*, Neanderthals, and *H. sapiens*. Therefore, it is widely believed that these Asian hominins are critical for studying the later evolution of the genus *Homo* and the origin of *H. sapiens*. The incomplete preservation of these fossils and the fact that they have largely been described by advocates of regional continuity have made it difficult to integrate them into the wider picture of human evolution. For example, Xuchang, Dali, and Hualongdong have all been described as transitional forms between Chinese *H. erectus* and *H. sapiens*, whose affinities can be understood in the context of a braided stream network model of gene flow.<sup>6–9</sup> Here, we report a fossil human cranium that is characterized by a combination of large cranial capacity, short face, and small cheek bones as in *H. sapiens*, but also a low vault, strong browridges, large molars, and alveolar prognathism as in most archaic humans. Through phylogenetic and biogeographic analyses, we argue that this fossil is the most complete representative of a distinct Middle Pleistocene lineage, with a separate evolutionary history in East Asia.

The Harbin human fossil is represented by a single cranium (HBSM2018-000018(A), housed in the Geoscience Museum of Hebei GEO University, Shijiazhuang, Hebei Province, China), which was reportedly discovered in 1933 during construction work when a bridge (Dongjiang Bridge) was built over the Songhua River in Harbin city (Figure 1). Because of a long and confused history since the discovery (see the supplemental information), the exact site of the find is uncertain. We tested the concentrations of rare earth elements (REEs) and the Sr isotopic composition of the human fossil and a range of mammalian fossils collected from deposits of the Songhua River near the supposed locality (Dongjiang Bridge), and used non-destructive X-ray fluorescence analyses to examine the element distributions of these human and mammalian fossils. The results of our experiments show that element distributions and REE concentrations of the Harbin cranium and the mammalian fossils found near Dongjiang Bridge have similar distribution patterns.<sup>10</sup> The Sr isotopic composition of the Harbin cranium falls in the range of the local Middle Pleistocene-Early Holocene human and mammalian fossils.<sup>10</sup> We also directly dated the Harbin fossil cranium by the uranium-series disequilibrium (U-series) method. The results suggest a minimum age for the cranium of ~146 ka.<sup>10</sup> While these results cannot pin the Harbin cranium to an exact site and layer, they are consistent with the conclusion that the cranium is from the late Middle Pleistocene of the Harbin area.<sup>10</sup>

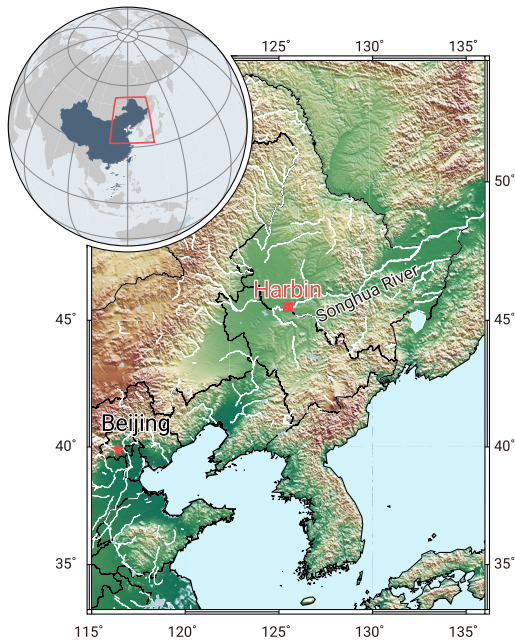

**Figure 1. Geographic location of the Harbin cranium** The red square indicates the Dongjiang Bridge in Harbin city.

## RESULTS AND DISCUSSION

### Morphology

The Harbin cranium is undistorted and almost intact, with the main losses being all but one tooth (the left  $M^2$ ), and slight damage to the left zygomatic arch (Figure 2). It is massive in size, showing the largest values in our comparative fossil database (see the supplemental information) for measurements, such as maximum cranial length, nasio-occipital length, and supraorbital torus breadth, and the second largest values for measurements, such as biauricular breadth, frontal chord, zygomatic breadth, and biorbital breadth. Detailed morphological descriptions and comparisons of the cranium are given in the supplemental information, and are summarized below.

The cranial vault is voluminous (~1,420 mL capacity, measured using high-resolution computed tomography [CT] scanning and three-dimensional reconstruction of the endocranial cast). However, the braincase is clearly archaic, with a very wide supraorbital torus, base and palate, and a long and low shape in lateral view, with a receding frontal and evenly curved parietal contour.

Nevertheless, it lacks both the angulated occipital with a strong transverse torus found in *H. erectus* and *H. heidelbergensis/H. rhodesiensis* crania, and the protruding occipital region with a central suprainiac fossa typical of Neanderthals. In posterior view the unkeeled cranium is widest in the supramastoid area, below which the well-developed mastoid processes slope inward. The temporals and parietals do not converge strongly as in *H. erectus* fossils, but there is no upper parietal expansion, as found in recent *H. sapiens*, nor the "en bombe" shape typical of Neanderthals. In lateral view the face is relatively low in height and retracted under the cranial vault, lacking the total anterior projection typical of *H. erectus* and *H. heidelbergensis/H. rhodesiensis*. The upper face and nasal aperture are very wide, but the zygomaxillary region is transversely flat and faces anteriorly, with a morphology like that of *H. sapiens*.

The combination of an archaic but large-brained cranial vault and a wide but *H. sapiens*-like face is striking, and is also found in the less-complete Middle Pleistocene Chinese fossils from Dali and Jinniushan, although they differ in details of morphology (see the supplemental information and Videos S1–S3). The less-complete Hualongdong cranium resembles Dali more closely in several respects, and some of its differences may be due to its immaturity, while the Xuchang and Maba partial crania appear more distinct (see the supplemental information for more details and comparative data).

Overall, the Harbin cranium shows an individual combination of traits, and probably represents a distinct species of *Homo* from other designated Middle-Late Pleistocene human taxa, such as *H. sapiens*, *H. neanderthalensis*, and *H. heidelbergensis/H. rhodesiensis*. Its enormous overall size sets it apart from nearly every other fossil but, in terms of cranial vault proportions, the braincase clearly overlaps in shape with those of other large-sized late archaic *Homo* species. However, the face, despite its enormous breadth dimensions, is relatively low in height and has an *H. sapiens* and *H. antecessor*-like zygomaxillary shape that is also found in the Middle Pleistocene Chinese fossils from Dali and Jinniushan. It is also hafted onto the braincase with reduced prognathism, as in recent humans. In its combination of traits, the Harbin cranium is more like fossils attributed to early *H. sapiens*, such as Jebel Irhoud 1 and Eliye Springs, than to later members of our lineage. Finally, and perhaps significantly, the morphology and large size of the surviving Harbin  $M^2$  (Figure S1, mesiodistal length 13.6 mm and buccolingual width 16.6 mm) are matched most closely in the Late Pleistocene record by the permanent molars from Denisova Cave (Denisovan 4:  $M^{2/3}$ , mesiodistal length 13.1 mm, and buccolingual width 14.7 mm; Denisovan 8:  $M^3$ , mesiodistal length 14.3 mm, and buccolingual width 14.65 mm).<sup>11,12</sup>

### Life reconstruction

The overall size, robustness, thick and strong supraorbital tori, large mastoid processes, and salient temporal lines of the Harbin cranium suggest that

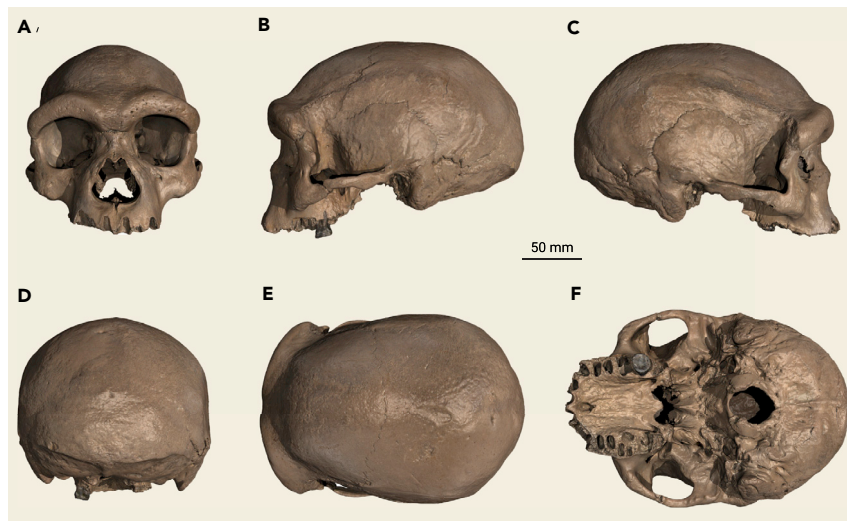

**Figure 2. The Harbin cranium in standard views** (A) Anterior view. (B) Lateral view, left side. (C) Lateral view, right side. (D) Posterior view. (E) Superior view. (F) Inferior view. Scale bar, 50 mm.



it probably represents a male individual. The ectocranial sutures at the mid-lambdoid, lambdoid, obelion, anterior sagittal, superior sphenotemporal, incisive, anterior and posterior median palatine, and transverse palatine are all completely obliterated. The ectocranial sutures at bregma, midcoronal, pterion, sphenofrontal, and inferior sphenotemporal show significant closure. For the standard of *H. sapiens*, the ectocranial suture composite scores would suggest an old adult around 50 years old.<sup>11,12</sup> However, the tooth wear seems to suggest a younger age. The only preserved M<sup>2</sup> still has much enamel present, and dentine exposure is present on the protocone and paracone. The relatively complete ectocranial suture closure may be related to the robustness of the Harbin cranium. The large square eye sockets with strong supraorbital tori indicate deep eyes. The large and wide piriform aperture indicates a large and bulbous nose. The expanded paranasal region and relatively projecting middle face are matched with flat and short modern human-like cheek regions. Large incisor and canine tooth sockets indicate that the man probably had quite large front teeth and a broad mouth. The mandible of this individual is not known, but the phylogenetic analyses suggest that the Harbin cranium and the Xiahe mandible from Gansu Province of China form a sister group. The M<sup>2</sup> size of the Harbin cranium matches the tooth size of the Xiahe mandible. It is reasonable to deduce that the Harbin cranium probably matches a mandible as robust as the Xiahe mandible and without a chin. It is hard to reconstruct the skin tone and hair color of the Harbin individual without genetic information, but available genetic data suggest that Neanderthals, Denisovans, and early *H. sapiens* generally had relatively dark skin, hair, and eye color. Considering the high latitude of the provenance of the Harbin cranium, we have chosen to give the reconstruction only a medium-dark skin color (Figure 3).

### Phylogenetic position of the Harbin cranium

Our extensive phylogenetic analyses based on parsimony criteria<sup>13</sup> and Bayesian inference<sup>14–17</sup> firstly support the monophyly of Neanderthals and the monophyly of *H. sapiens* (Figures 4 and S19–S23). The Irhoud fossils from Morocco form the most basal operational taxonomic unit (OTU) of the *H. sapiens* clade, and the Sima de los Huesos crania from Spain form the most basal OTU of the Neanderthal clade, in line with other current interpretations.<sup>18–20</sup> The Harbin cranium and Xiahe mandible form a sister group, and they, plus the Dali, Hualongdong, Jinniushan specimens, the European *H. antecessor* partial cranium, the African Eliye Springs cranium, and Rabat palate, form a monophyletic group. This clade forms the sister group of the similarly monophyletic *H. sapiens* clade. The specimens traditionally grouped in *H. heidelbergensis/H. rhodesiensis* do not constitute a monophyletic group and the Asian and African *H. erectus* specimens similarly form a paraphyletic group. When backbone constraints are used to reflect the results from palaeoproteomic and ancient DNA research by forcing the Xiahe mandible as the sister group of Neanderthals<sup>21</sup> and *H. antecessor* outside of the *H. sapiens*-Neanderthal clade,<sup>22</sup> Chinese late Middle Pleistocene humans, including the Harbin cranium, form a monophyletic clade as the sister group of Neanderthals (Figure S20). Both most parsimonious and backbone partially constrained phylogenetic trees support the monophyly of the group, including Dali, Jinniushan, Hualongdong, Xiahe, and Harbin.

Some researchers have proposed that all Middle Pleistocene hominins belong to a single lineage leading to modern humans, with Asian Middle Pleistocene hominins, such as Dali and Hualongdong, suggested as transitional forms between Asian *H. erectus* and Asian *H. sapiens* specimens.<sup>6,9,24</sup> Some other researchers have recognized these Asian hominins as part of the *H. heidelbergensis/H. rhodesiensis* hypodigm.<sup>25–27</sup> A previous analysis based on overall similarity showed differences between Dali-Maba and the *H. heidelbergensis* hypodigm, and the potential connection between Dali-Maba and African early *H. sapiens*.<sup>28</sup> Our analyses suggest that the Harbin cranium, together with Dali, Jinniushan, Hualongdong, and Xiahe, is not a part of the African and European *H. heidelbergensis/H. rhodesiensis* clade, but is the sister group of *H. sapiens* (see also the backbone partially constrained parsimony analysis in the supplemental information). The sister relationship between Harbin and Xiahe, as identified by Bayesian inference (but not parsimony analysis, see the supplemental information), is particularly interesting. The Xiahe mandible shows some proteomic features of the Denisovans,<sup>21</sup> who were informally called "*Homo sapiens altaiensis*" or "*Homo altaiensis*,"<sup>12,29</sup> and sediments from Baishiya Cave have yielded Denisovan mtDNA.<sup>30</sup> The Harbin M<sup>2</sup> also matches the known permanent Denisovan molars in size and root morphology, and, ever since the discovery of Denisovans, Asian Middle Pleistocene hominins, such as Dali, Jinniushan, and Xujiayao, have been suspected to represent an East Asian population of the Denisovans.<sup>31</sup> More mandibular specimens for the Harbin population or cranial specimens corresponding to the Xiahe mandible will test how close the Harbin and Xiahe humans are morphologically, while new genetic material will test the relationship of these populations to each other and to the Denisovans.

The results of the Bayesian tip-dating analyses suggest that the Harbin and Xiahe fossils shared a common ancestor ~188 ka (397–155 ka), and the clade, including the Harbin cranium and *H. sapiens* shared a common ancestor at ~949 ka (1,041.41–875.25 ka). The Neanderthal-*H. sapiens* divergence time in our analysis was ~1,007 ka (1,114–919 ka). This estimation falls in the range based on mtDNAs for the split between the basal Neanderthal (Sima de los Huesos) and the *H. sapiens* lineage,<sup>20</sup> but is much older than the estimation based on nuclear DNAs for the splits between the Neanderthal and *H. sapiens* lineages.<sup>32–34</sup> However, it is possible that this younger estimated divergence date is an artifact of statistical averaging between "super-archaic" and "recent gene flow" events.<sup>35</sup> The common ancestor of the *H. sapiens* OTUs included in our analysis is as old as ~770 ka (922–622 ka), suggesting that the *H. sapiens* clade has a much deeper origin time than previously estimated. The Eurasian *H. sapiens* OTUs share a common ancestor ~416 ka (534–305 ka) old. Outside of Africa, however, the earliest known *H. sapiens* fossil is only ~210 ka.<sup>36</sup>

There is a large time gap between the hypothetical common ancestor of Eurasian *H. sapiens* and the actual fossil record, from the Bayesian tip-dating analysis. One plausible hypothesis is that the ancestral population of Eurasian *H. sapiens* may have diversified in Africa for many millennia before they dispersed into Eurasia. Genetic studies on ancient DNA suggest that the initial genetic exchanges between Neanderthals and *H. sapiens* occurred between 468 and 219 ka,<sup>33</sup> or between ~370 and 100 ka,<sup>34</sup> and the introgression may

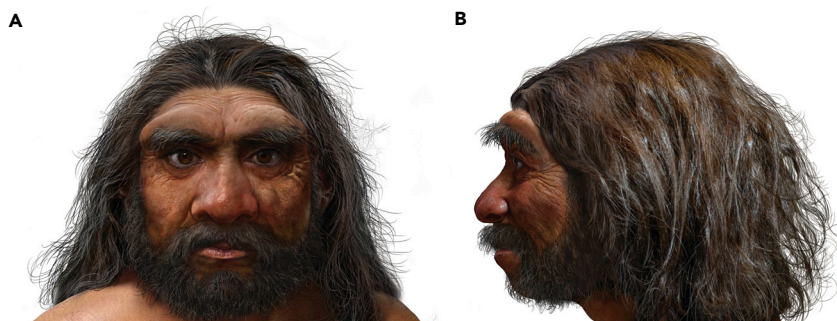

**Figure 3. Life reconstruction of the Harbin cranium**  
(A) Anterior view.  
(B) Lateral view, left side.



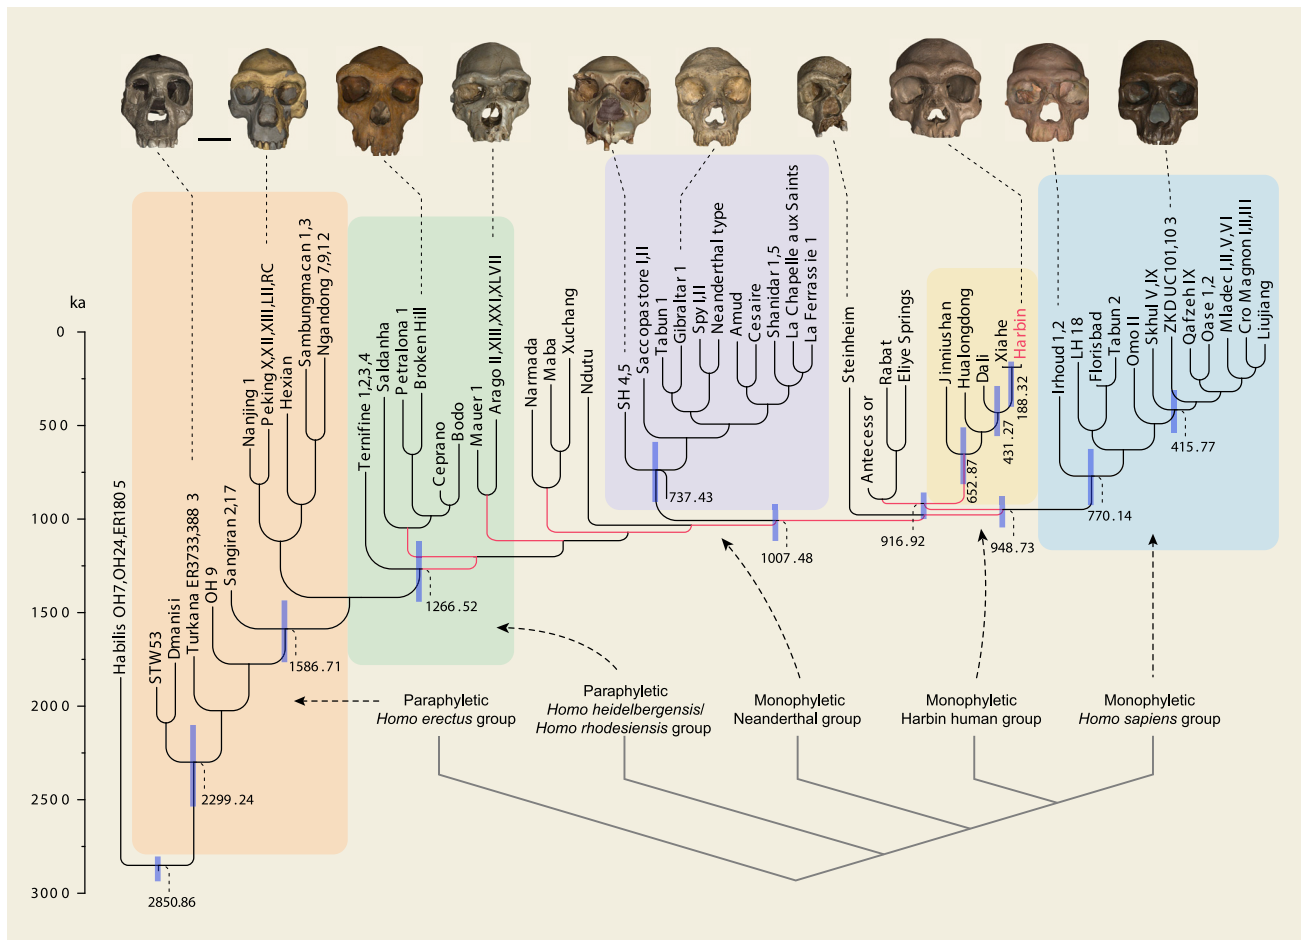

**Figure 4. Phylogeny of the 55 selected fossils from the genus *Homo*** The topology of the tree was inferred from a Bayesian tip-dating analysis in MrBayes 3.2<sup>23</sup> and summarized as the all-compatible tree. To reduce the polytomy at some clades, the strict consensus of the most parsimonious trees from the parsimony analysis in TNT<sup>13</sup> was used as a reference. The branches in red indicate the backbone constraints based on the most parsimonious trees. Branch lengths are proportional to the division age in thousands of years. Numbers at the internal nodes are the median ages, and the blue bars indicate the 95% highest posterior density interval of the node ages. Color shadows indicate the monophyletic *H. sapiens* group, Neanderthal group and Harbin human group, and the paraphyletic *H. heidelbergensis*/*H. rhodensis* group and *H. erectus* group. A simplified phylogenetic relationship of the five groups is shown on the lower right. Human crania images are aligned to the Frankfurt horizontal plane. Scale bar, 50 mm (between the Turkana and Peking crania).

have originated through gene flow from an African source.<sup>19,33</sup> Interestingly, not only does the estimated time of the introgression event between Neanderthals and *H. sapiens* roughly overlap our prediction for the age of the common ancestor of Eurasian *H. sapiens*, but the African origin of the introgression is also consistent with our African ancestral population hypothesis.

### Biogeography of the *Homo* species/populations

We conducted maximum likelihood analysis under 18 different biogeographical models and estimated the number and type of biogeographical events using biogeographical stochastic mapping (BSM). The Akaike information criterion (AIC) model selection strongly supported dispersal-extinction cladogenesis<sup>37,38</sup> with the founder-event dispersal ("jump dispersal")<sup>39,40</sup> model (DEC + j) as the best fit and the most probable biogeographical model (Tables S12–S14). Under this best fitting model (Figure 5), the ancestral distribution range of the Harbin, Dali, Jinniushan, Xiahe and Hualongdong group is most probably in Asia. The ancestral area for the Harbin-*H. sapiens* clade is most probably from Africa, supporting the idea that Africa is the center of origin of the *H. sapiens* clade. The ancestral distribution of the group bracketing Neanderthal, *H. sapiens*, and Harbin is from Africa or Europe.

Our simulation of the biogeographical history of *Homo* species/populations identified sympatry diversification (~57%) and founder-event dispersal (~42%) as the common types of biogeographical modes across the phylogenetic tree of *Homo* (Table S15). Because all the OTUs are at the population

level from a single locality, it is reasonable to find that no range expansion or range contraction event is detected from the BSM simulations. Founder-event dispersal usually involves a small number of individuals that dispersed to a new locality through a long dispersal distance and established a new isolated founder population.<sup>42–44</sup> The changes in distribution range occurred at a lineage-splitting node, resulting in one daughter lineage dispersal into a new range, and the other daughter lineage remaining in the ancestral range. Sympatric diversification and founder-event dispersal being the most dominant biogeographical modes reflects the fact that multi-lineages of *Homo* coexisted in Africa, Europe, and Asia during the Middle and Late Pleistocene. These *Homo* lineages probably had a strong capability of dispersing for long distances, but remained in relatively small and isolated populations.

BSMs indicate that the directionality of the dispersals between Africa, Asia, and Europe is asymmetric (Figure 5; Table S15). Asia is a sink of *Homo* species/populations that receives more dispersals from Africa and Europe than it gives dispersals to Africa and Europe. In total, Asia receives ~42% of the total dispersal events and only provides ~24% dispersals to other continents (Figure 5; Table S16). Africa is the major source of *Homo* dispersals. In total, ~40% of all the dispersals are from Africa, while Africa also receives ~22% dispersals from Asia and Europe. Instead of a unidirectional "out of Africa" model, a multi-directional "shuttle dispersal model" is more likely to explain the complex phylogenetic connections among African and Eurasian *Homo* species/populations.

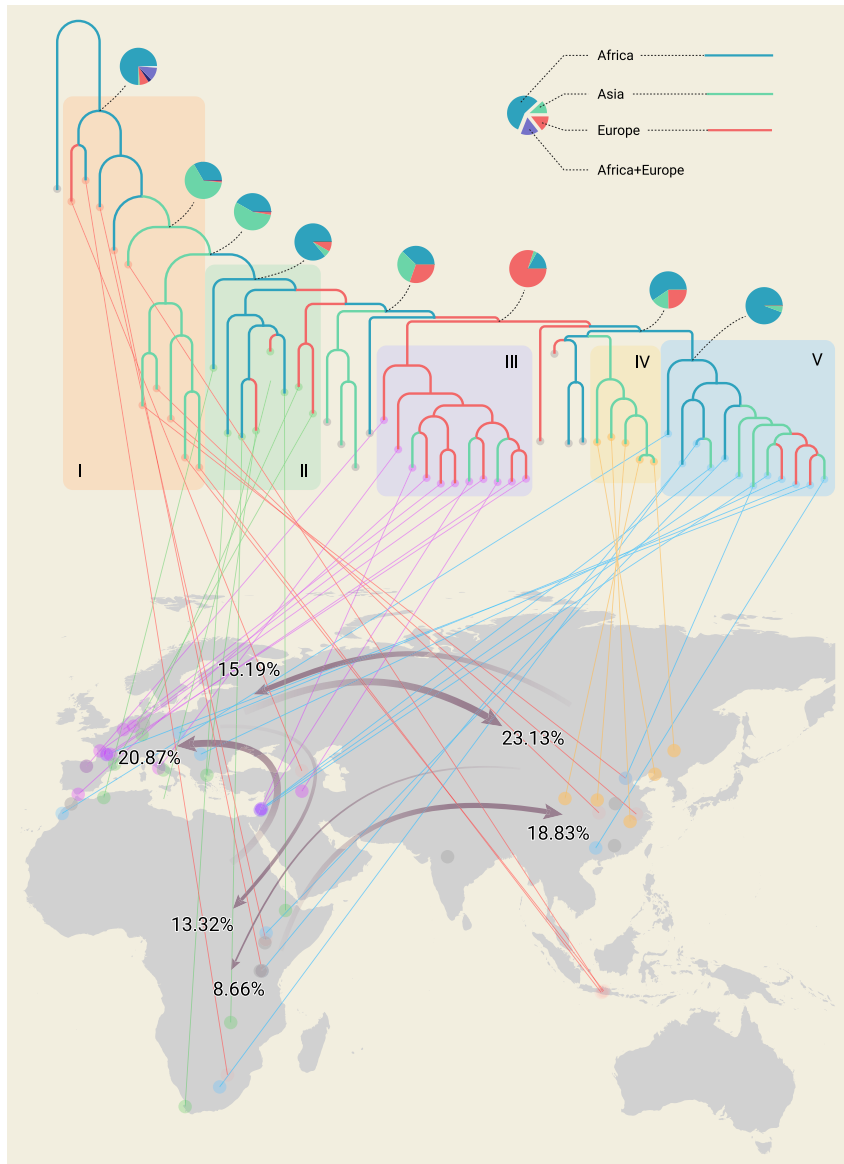

**Figure 5. Maximum likelihood ancestral range estimations and dispersal events for the Pleistocene *Homo* species/populations** R<sup>41</sup> package BioGeoBEARS<sup>39,40</sup> was used to estimate ancestral range probabilities and the number of dispersals. Topology of the phylogenetic tree is the same as that in Figure 4. The branch colors (red, blue, and green) indicate the geographical occurrences of the *Homo* fossils and the maximum likelihood ancestral range estimations for *Homo* under the best DEC + *j* model (dispersal-extinction cladogenesis<sup>38</sup> with the founder-event dispersal<sup>39,40</sup> model). The pie diagrams at the nodes show the relative probability of all possible ancestral distribution (areas or combinations of areas). Color shadows behind the phylogenetic tree indicate: I, *H. erectus* group; II, *H. heidelbergensis*/*H. rhodesiensis* group; III, Neanderthal group; IV, Harbin human group; V, *H. sapiens* group. Terminal taxa are linked with their geographical distributions. Grey arrows indicate the dispersal events between Africa, Asia, and Europe. Numbers near the arrowheads show the percentages of the means for the count of dispersal events between each pair of regions. The means are calculated from the event counts in each of 100 biogeographical stochastic maps. The common ancestor of the *H. sapiens* group and the common ancestor of the *H. sapiens* group, Harbin human group, and Neanderthal group are from Africa. However, the monophyletic clade embraced between the *H. sapiens* group and Asian *H. erectus* has an ancestral distribution in Asia. Asia received more dispersals from the other two continents. Africa received fewer dispersal from the other two continents.

## Conclusions

The Harbin cranium is one of the best preserved of all archaic human fossils and its estimated late Middle Pleistocene age places it as an Asian contemporary of the evolving *H. sapiens*, *H. neanderthalensis*, and Denisovan lineages. It is huge in size, and its distinctive combination of traits in the cranial vault and face differentiate it from *H. sapiens* and *H. neanderthalensis*, as well as from the earlier species *H. heidelbergensis*/*H. rhodesiensis*. Instead it shows the greatest resemblances to Middle Pleistocene Chinese fossils, such as Hualongdong, Dali, and Jinniushan. This is confirmed by phylogenetic analyses using parsimony and Bayesian methods, which place these Chinese fossils with Harbin as a part of the sister group to *H. sapiens*, based on synapomorphies, such as a moderate post-toral sulcus, gently arched zygomaticoalveolar crest, presence of inferior orbital torus, strong malar tubercle, and thick mastoid processes. Our analyses also suggest a potential link between the Harbin cranium and the Xiahe mandible, a fossil attributed to the Denisovan lineage. The northerly location of the Harbin site also has implications for Middle Pleistocene human adaptive capabilities, since, even in the present interglacial, this region has winter temperatures averaging more than 16°C below zero. The very large size of the Harbin individual (as judged from the size of the cranium) may indicate physical adaptation to such conditions.<sup>45</sup> The coexistence of several human lineages during the late Middle

and Late Pleistocene of Asia is probably related to its diverse palaeoenvironments (ranging from the Gobi Desert to rainforest, and from coastal plains to the Qinghai-Tibet Plateau), which produced a varied biogeographic sink for human evolution.

## MATERIAL AND METHODS

### Morphological studies

We scored and measured morphological characters from 95 cranial, mandibular, or dental specimens of the *Homo* genus (Table S1). All the specimens and replicas used in this research are under the oversight of the institutional review board of the Hebei GEO University, the Institute of Vertebrate Paleontology or the Natural History Museum, London. We used the high-resolution CT facilities and the surface scanner at the Key Laboratory of Vertebrate Evolution and Human Origins of the Chinese Academy of Sciences and the Natural History Museum, London, to CT scan or surface scan all the *Homo* fossils and casts included in this study. We used VG Studio Max 3.2 to build three-dimensional models. All measurements were taken from the digital three-dimensional models.

### Phylogenetic analyses

Although it is debatable how phenomic features are correlated to each other and whether some characters are more important than others for phylogeny reconstruction, phylogenetic analysis based on phenomic characters has long been practiced to generate phylogenetic frameworks for hominins (e.g., Wood and other

workers<sup>25,46–49</sup>). We built a phenomic character data matrix (232 discrete characters and 400 continuous characters) using MorphoBank.<sup>50</sup> Most of the 234 discrete characters are widely used and discussed in paleoanthropological research (see the supplemental information). The continuous characters include 184 linear measurements, 22 angles, and 194 ratios. The linear and angular measurements were taken following the standards defined by Martin and Saller,<sup>51</sup> and Howells.<sup>52</sup> In total, 1,379 annotated images and 9,618 labels were used in MorphoBank (MorphoBank: Project 3385) to illustrate the phenomic homologies. To remove the effect of body size, the linear measurements of the crania and the upper dentitions of a scored specimen were divided by the 1/3 power of the cranial capacity of this specimen. The linear measurements of the mandibles and lower dentitions of a scored specimen were divided by the biramus breadth at the alveolar margin of this specimen. We consciously avoided redundant and potentially correlated discrete characters. All the continuous characters were normalized to have a range between 0 and 1. Normalization of the continuous characters can significantly reduce the potential correlations among different characters.

For most of the species/populations of *Homo*, palaeoproteomic or ancient DNA data are unknown. Thus, phenomic data form the base of evidence for setting taxonomic boundaries and/or phylogenetic relationships. It has been shown that hybridization does not cause significant taxonomic problems in most analyses.<sup>53,54</sup> and we assume that any interbreeding between the OTUs did not affect the distribution or expression of characters for parsimony or Bayesian tip-dating analyses.

To reflect intra- and inter-species morphological variation, specimens that were from the same locality and generally accepted as the same species/population were grouped into one OTU. After combination, 55 OTUs were used as terminal taxa for the phylogenetic and biogeographic analyses. The OTUs cover most of the major clades or groups of the *Homo* genus. For each terminal taxon, we use the most recently published dating results (Table S1). The Hualongdong skull, *H. antecessor* ATD6-69, and the Turkana KNM-WT 15000 fossil are adolescent individuals. The main effects of their young ages will be in the final stages of cranial growth and the full development of face and mandible size, and cranial superstructures. When scoring these young specimens, we chose characters and character states that are little affected by their immaturity.

Parsimony analysis of the data matrix, including discrete and continuous characters was undertaken by using TNT, Tree analysis using New Technology, a parsimony analysis program subsidized by the Willi Hennig Society.<sup>13</sup> We used the parallel version of TNT on 100 CPU cores. In total, one million replications were performed (10,000 replications on each core). The 234 discrete characters were all equally weighted. Forty-six multi-state characters were set as “ordered.” The merged cells with multiple states were set to polymorphism. To separately reflect recent results from palaeoproteomic and ancient DNA research,<sup>521,2232</sup> partial backbone constraints were used to force the Xiahe mandible as the sister group of Neanderthals and to force *H. antecessor* outside of the Neanderthal-Xiahe-*H. sapiens* clade (see the supplemental information). We used Bremer supports<sup>55</sup> calculated in TNT to describe the stability of the phylogenetic results.

Estimating the split time of ancestral species/populations of *Homo* should be treated with caution, because all estimations must be based on particular models. The divergence times between Neanderthal, Denisovan, and fossil *H. sapiens* populations, as reflected by ancient DNA sequences and favored by one of the present authors (C.S. in Bergström et al.<sup>35</sup>), rely on a fixed human DNA sequence mutation rate.<sup>19,20,32,33,56</sup> However, in our Bayesian tip-dating analysis we included fossil ages for all the OTUs to inform the divergence times of all the *Homo* clades, and co-estimated the clock rate together with the divergence times (instead of using a fixed mutation rate, see the supplemental information). We used the Bayesian tip-dating approach<sup>14–17</sup> implemented in MrBayes 3.2.7<sup>23</sup> to infer the timetree and evolutionary rates. This method integrates both the fossil ages and the morphological data while accounting for their uncertainties in a coherent analysis. Since MrBayes 3.2.7 cannot handle continuous characters directly and can only deal with ordered characters up to six states, all the continuous characters were discretized into six states. We executed four independent runs and eight chains per run (one cold and seven hot chains with temperature 0.05) in the Markov chain Monte Carlo simulation. Each run was executed with 100 million iterations, and sampled every 2,000 iterations.

To test whether different age estimates for the Harbin cranium would change its phylogenetic position in the Bayesian tip-dating analyses, we also used 296 ± 8 and 59–304 ka (the maximum U-series age and the maximum U-series age range, see the supplemental information) as the tip ages for the Harbin cranium. Different tip age estimates have very minor influence on the topology and the divergence age estimation of the whole tree (Figures S22 and S23).

#### Biogeographical analyses

We used the R<sup>41</sup> package BioGeoBEARS<sup>39,40</sup> to compare biogeographical models and estimate ancestral range probabilities of *Homo* species/populations. The same R package was also used to estimate the number of dispersal, vicariance, and sympatry events with BSM<sup>40</sup> using the same R package. The Bayesian tip-dating all-compatible consensus tree was used for biogeographical analyses. We tested 18 biogeographical models, including 3 hypotheses of dispersal routes from Africa to

Asia. AIC was used to select the best fitting model.<sup>37</sup> We ran 1,000 BSMs under the best fitting biogeographical model, and calculated the means and standard deviations of biogeographical events across the 100 mapping processes.

#### Data availability

The phenomic data matrix, including scoring, metrical measurements, illustrations, and labels will be released on MorphoBank (project 3385) after publication. Full description of the methods and the scripts for computational analyses are given in the supplemental information. Other data will be available by request to X.N. and Q.J.

#### REFERENCES

- Grün, R., Pike, A., McDermott, F., et al. (2020). Dating the skull from Broken Hill, Zambia, and its position in human evolution. *Nature*. <https://doi.org/10.1038/s41586-020-2165-4>.
- Berger, L.R., Hawks, J., de Ruiter, D.J., et al. (2015). *Homo naledi*, a new species of the genus *Homo* from the Dinaledi Chamber, South Africa. *eLife* **4**, e09560. <https://doi.org/10.7554/eLife.09560>.
- Hublin, J.-J., Ben-Ncer, A., Bailey, S.E., et al. (2017). New fossils from Jebel Irhoud, Morocco and the pan-African origin of *Homo sapiens*. *Nature* **546**. <https://doi.org/10.1038/nature22336>.
- Wood, B., and Baker, J. (2011). Evolution in the genus *Homo*. *Ann. Rev. Ecol. Evol. Syst.* **42**, 47–69. <https://doi.org/10.1146/annurev-eolsys-102209-144653>.
- Reich, D., Green, R.E., Kircher, M., et al. (2010). Genetic history of an archaic hominin group from Denisova Cave in Siberia. *Nature* **468**, 1053–1060. <https://doi.org/10.1038/nature09710>.
- Wu, X., and Athreya, S. (2013). A description of the geological context, discrete traits, and linear morphometrics of the middle Pleistocene hominin from Dali, Shaanxi Province, China. *Am. J. Phys. Anthropol.* **150**, 141–157.
- Athreya, S., and Wu, X. (2017). A multivariate assessment of the Dali hominin cranium from China: morphological affinities and implications for Pleistocene evolution in East Asia. *Am. J. Phys. Anthropol.* **164**, 679–701. <https://doi.org/10.1002/ajpa.23305>.
- Li, Z.-Y., Wu, X.-J., Zhou, L.-P., et al. (2017). Late Pleistocene archaic human crania from Xuchang, China. *Science* **355**, 969–972.
- Wu, X.-J., Pei, S.-W., Cai, Y.-J., et al. (2019). Archaic human remains from Hualongdong, China, and Middle Pleistocene human continuity and variation. *Proc. Natl. Acad. Sci. U.S.A.* **116**, 9820–9824. <https://doi.org/10.1073/pnas.1902396116>.
- Shao, Q., Ge, J., Ji, Q., et al. (2021). Geochemical locating and direct dating of the Harbin archaic human cranium. *The Innovation* **2**, 100131. In this issue. <https://doi.org/10.1016/j.xinn.2021.100131>.
- Sawyer, S., Renaud, G., Viola, B., et al. (2015). Nuclear and mitochondrial DNA sequences from two Denisovan individuals. *Proc. Natl. Acad. Sci. U.S.A.* **112**, 15696–15700. <https://doi.org/10.1073/pnas.1519905112>.
- Zubova, A.V., Chikisheva, T.A., and Shunkov, M.V. (2017). The morphology of permanent molars from the Paleolithic layers of Denisova Cave. *Archaeol. Ethnol. Anthropol. Euras.* **45**, 121–134. <https://doi.org/10.17746/1563-0110.2017.45.1.121-134>.
- Goloboff, P.A., Farris, J.S., and Nixon, K.C. (2008). TNT, a free program for phylogenetic analysis. *Cladistics* **24**, 774–786.
- Ronquist, F., Klopfstein, S., Vilhelmsen, L., et al. (2012). A total-evidence approach to dating with fossils, applied to the early radiation of the Hymenoptera. *Syst. Biol.* **61**, 973–999. <https://doi.org/10.1093/sysbio/sys058>.
- Gavryushkina, A., Heath, T.A., Ksepka, D.T., et al. (2017). Bayesian total-evidence dating reveals the recent crown radiation of penguins. *Syst. Biol.* **66**, 57–73. <https://doi.org/10.1093/sysbio/syw060>.
- Zhang, C., Stadler, T., Klopfstein, S., et al. (2016). Total-evidence dating under the fossilized birth-death process. *Syst. Biol.* **65**, 228–249. <https://doi.org/10.1093/sysbio/syw080>.
- Zhang, C., and Wang, M. (2019). Bayesian tip dating reveals heterogeneous morphological clocks in Mesozoic birds. *R. Soc. Open Sci.* **6**, 182062. <https://doi.org/10.1098/rsos.182062>.
- Arsuaga, J.L., Martínez, I., Arnold, L.J., et al. (2014). Neandertal roots: cranial and chronological evidence from Sima de los Huesos. *Science* **344**, 1358–1363. <https://doi.org/10.1126/science.1253958>.
- Meyer, M., Arsuaga, J.-L., de Filippo, C., et al. (2016). Nuclear DNA sequences from the Middle Pleistocene Sima de los Huesos hominins. *Nature* **531**, 504–507. <https://doi.org/10.1038/nature17405>.
- Meyer, M., Fu, Q., and Aximu-Petri, A. (2014). A mitochondrial genome sequence of a hominin from Sima de los Huesos. *Nature* **505**, 403–406. <https://doi.org/10.1038/nature12788>.
- Chen, F., Welker, F., Shen, C.-C., et al. (2019). A late Middle Pleistocene Denisovan mandible from the Tibetan plateau. *Nature* **569**, 409–412. <https://doi.org/10.1038/s41586-019-1139-x>.
- Welker, F., Ramos-Madruga, J., Gutenbrunner, P., et al. (2020). The dental proteome of *Homo antecessor*. *Nature* **580**, 235–238. <https://doi.org/10.1038/s41586-020-2153-8>.



23. Ronquist, F., Teslenko, M., van der Mark, P., et al. (2012). MrBayes 3.2: efficient Bayesian phylogenetic inference and model choice across a large model space. *Syst. Biol.* **61**, 539–542. <https://doi.org/10.1093/sysbio/sys029>.
24. Etler, D.A. (2006). *Homo erectus* in East Asia: human ancestor or evolutionary dead-end? *Athena Rev.* **4**, 37–50.
25. Wood, B., and Loneragan, N. (2008). The hominin fossil record: taxa, grades and clades. *J. Anat.* **212**, 354–376.
26. Tattersall, I., and Schwartz, J.H. (2009). Evolution of the genus *Homo*. *Ann. Rev. Ear. Plan. Sci.* **37**, 67–92. <https://doi.org/10.1146/annurev.earth.031208.100202>.
27. Tattersall, I. (2011). In *Continuity and Discontinuity in the Peopling of Europe: One Hundred Fifty Years of Neanderthal Study*, S. Condemi and G.-C. Weniger, eds. (Springer), pp. 47–53.
28. Stringer, C.B. (1992). Reconstructing recent human evolution. *Phil. Trans. R. Soc. B* **337**, 217–224.
29. Derevianko, A.P. (2011). The origin of anatomically modern humans and their behavior in Africa and Eurasia. *Archaeol. Ethnol. Anthropol. Euras.* **39**, 2–31. <https://doi.org/10.1016/j.aee.2011.09.001>.
30. Zhang, D., Xia, H., Chen, F., et al. (2020). Denisovan DNA in late Pleistocene sediments from Baishiyu Karst Cave on the Tibetan plateau. *Science* **370**, 584–587. <https://doi.org/10.1126/science.abb6320>.
31. Stringer, C. (2012). The status of *Homo heidelbergensis* (Schoetensack 1908). *Evol. Anthropol.* **21**, 101–107. <https://doi.org/10.1002/evan.21311>.
32. Prüfer, K., Racimo, F., Patterson, N., et al. (2014). The complete genome sequence of a Neanderthal from the Altai Mountains. *Nature* **505**, 43–49. <https://doi.org/10.1038/nature12886>.
33. Posth, C., Wißing, C., Kitagawa, K., et al. (2017). Deeply divergent archaic mitochondrial genome provides lower time boundary for African gene flow into Neanderthals. *Nat. Comm.* **8**, 16046. <https://doi.org/10.1038/ncomms16046>.
34. Petr, M., Hajdinjak, M., Fu, Q., et al. (2020). The evolutionary history of Neanderthal and Denisovan Y chromosomes. *Science* **369**, 1653–1656. <https://doi.org/10.1126/science.abb6460>.
35. Bergström, A., Stringer, C., Hajdinjak, M., et al. (2021). Origins of modern human ancestry. *Nature* **590**, 229–237. <https://doi.org/10.1038/s41586-021-03244-5>.
36. Harvati, K., Röding, C., Bosman, A.M., et al. (2019). Apidima Cave fossils provide earliest evidence of *Homo sapiens* in Eurasia. *Nature* **571**, 500–504. <https://doi.org/10.1038/s41586-019-1376-z>.
37. Burnham, K.P., and Anderson, D.R. (2002). *Model Selection and Multimodel Inference: A Practical Information-Theoretic Approach, Second edition* (Springer), p. 488.
38. Ree, R.H., and Smith, S.A. (2008). Maximum likelihood inference of geographic range evolution by dispersal, local extinction, and cladogenesis. *Syst. Biol.* **57**, 4–14. <https://doi.org/10.1080/10635150701883881>.
39. Matzke, N.J. (2016). Stochastic Mapping under Biogeographical Models (Wikidot.com). [http://phylo.wikidot.com/biogeobears#stochastic\\_mapping](http://phylo.wikidot.com/biogeobears#stochastic_mapping).
40. Matzke, N.J. (2018). BioGeoBEARS: bioGeography with Bayesian (and Likelihood) Evolutionary Analysis with R Scripts (GitHub). <https://github.com/nmatzke/BioGeoBEARS>.
41. R Core Team (2018). R: A Language and Environment for Statistical Computing (The R Foundation). <http://www.R-project.org>.
42. Matzke, N.J. (2014). Model selection in historical biogeography reveals that founder-event speciation is a crucial process in Island Clades. *Syst. Biol.* **63**, 951–970. <https://doi.org/10.1093/sysbio/syu056>.
43. Soto-Trejo, F., Matzke, N.J., Schilling, E.E., et al. (2017). Historical biogeography of Florestina (Asteraceae: Bahieae) of dry environments in Mexico: evaluating models and uncertainty in low-diversity clades. *Bot. J. Linn. Soc.* **185**, 497–510. <https://doi.org/10.1093/botlinnean/box069>.
44. Dupin, J., Matzke, N.J., Särkinen, T., et al. (2017). Bayesian estimation of the global biogeographical history of the Solanaceae. *J. Biogeogr.* **44**, 887–899. <https://doi.org/10.1111/jbi.12898>.
45. Ruff, C. (2002). Variation in human body size and shape. *Ann. Rev. Anthropol.* **31**, 211–232. <https://doi.org/10.1146/annurev.anthro.31.040402.085407>.
46. Strait, D.S., and Grine, F.E. (2004). Inferring hominoid and early hominid phylogeny using craniodental characters: the role of fossil taxa. *J. Hum. Evol.* **47**, 399–452.
47. González-José, R., Escapa, I., Neves, W.A., et al. (2008). Cladistic analysis of continuous modularized traits provides phylogenetic signals in *Homo* evolution. *Nature* **453**, 775–778. <https://doi.org/10.1038/nature06891>.
48. Argue, D., Morwood, M., Sutikna, T., et al. (2009). *Homo floresiensis*: a cladistic analysis. *J. Hum. Evol.* **57**, 623–639. <https://doi.org/10.1016/j.jhevol.2009.05.002>.
49. Mounier, A., Balzeau, A., Caparros, M., et al. (2016). Brain, calvarium, cladistics: a new approach to an old question, who are modern humans and Neandertals? *J. Hum. Evol.* **92**, 22–36. <https://doi.org/10.1016/j.jhevol.2015.12.006>.
50. O'Leary, M.A., and Kaufman, S. (2011). MorphoBank: phylophenomics in the “cloud”. *Cladistics* **27**, 529–537. <https://doi.org/10.1111/j.1096-0031.2011.00355.x>.
51. Martin, R., and Saller, K. (1956). *Lehrbuch der Anthropologie*. In *Systematischer Darstellung. Lieferung 3. Systematische Anthropologie* (Gustav Fischer Verlag), pp. 273–518.
52. Howells, W.W. (1973). Cranial variation in man. A study by multivariate analysis of patterns of differences among recent human populations. *Pap. Peab. Mus. Archaeol. Ethnol.* **67**, 1–190.
53. McDade, L.A. (1995). Species concepts and problems in practice: insight from botanical monographs. *Syst. Bot.* **20**, 606–622. <https://doi.org/10.2307/2419813>.
54. Rieseberg, L.H., Wood, T.E., and Baack, E.J. (2006). The nature of plant species. *Nature* **440**, 524–527. <https://doi.org/10.1038/nature04402>.
55. Bremer, K. (1994). Branch support and tree stability. *Cladistics* **10**, 295–304.
56. Bokelmann, L., Hajdinjak, M., Peyrégne, S., et al. (2019). A genetic analysis of the Gibraltar Neanderthals. *Proc. Natl. Acad. Sci. U.S.A.* **116**, 15610–15615. <https://doi.org/10.1073/pnas.1903984116>.

## ACKNOWLEDGMENTS

We thank Messrs Yemao Hou, Wei Zhang, Ning Ma, Ruiping Tang, and Ms Fang Zheng for CT scanning, surface model scanning, geological imaging, and Anthropology staff, especially Dr. Rachel Ives, at the Natural History Museum London for the provision of comparative material. We are grateful for the support of Drs. Fengming Wang, Chun Li, Xiujie Wu, Dongju Zhang, Lucile Crété, Tao Deng, and Tao Zhan. Heilongjiang Academy of Geological Sciences helped with core-drilling and sample collections. Dr. Tao Yang from the Nanjing University helped with the REE and Sr isotopic analyses. Drs. Lei Zhang, Jinhai Zhang, and Wei Yang from the Innovation Academy for Earth Science of Chinese Academy of Sciences helped with geographic imaging. We also thank Jinhai Zhang and Wei Yang for helpful discussions. This project has been supported by the National Natural Science Foundation of China (41842039, 41625005, 41888101, 41988101, 41877430, 41977380), the Strategic Priority Research Program of the Chinese Academy of Sciences (CAS) (XDB26030300, XDA20070203, XDA19050100), the People's Government of Hebei Province (Z20177187), the China Geological Survey (DD20190601), the Science Foundation of Hebei GEO University (TS2017-001), and the Second Tibetan Plateau Scientific Expedition and Research Program (2019QZKK0705). C.S.'s research is supported by the Calvea Foundation and the Human Origins Research Fund. Mr. Chuang Zhao produced the artist's illustration of the life reconstruction. We thank the reviewers for their help in improving the paper.

## AUTHOR CONTRIBUTIONS

Q.J. obtained the Harbin cranium, organized the project, and edited the manuscript. Q.S. performed U-series dating, REE and Sr isotopic analyses, analyzed the U-series dating data, and edited the manuscript. J.G. analyzed the REE and Sr isotopic data, and edited the manuscript. J.L. performed XRF analyses, and edited the manuscript. C.Z. performed the Bayesian tip-dating analysis, and edited the manuscript. R.G. analyzed the U-series dating data, and edited the manuscript. Q.L. collected the mammalian fossils, revised the phylogenetic data matrix, and edited the manuscript. W.W., Y.J., Z.G., and L.L. collected data, drilled the core, and measured sections. C.S. described and compared the fossils, revised the phylogenetic data matrix, and wrote the manuscript. X.N. organized the project, developed the phylogenetic data matrix, described and compared the fossils, performed phylogenetic and biogeographical analyses, and wrote the manuscript.

## DECLARATION OF INTERESTS

The authors declare no competing interests.

## SUPPLEMENTAL INFORMATION

Supplemental information can be found online at <https://doi.org/10.1016/j.xinn.2021.100130>.

**The Innovation, Volume 2**

**Supplemental Information**

**Massive cranium from Harbin in northeastern China establishes a new  
Middle Pleistocene human lineage**

**Xijun Ni, Qiang Ji, Wensheng Wu, Qingfeng Shao, Yannan Ji, Chi Zhang, Lei Liang, Junyi Ge, Zhen Guo, Jinhua Li, Qiang Li, Rainer Grün, and Chris Stringer**

The Innovation, Volume ■ ■

## Supplemental Information

### **Massive cranium from Harbin in northeastern China establishes a new Middle Pleistocene human lineage**

**Xijun Ni, Qiang Ji, Wensheng Wu, Qingfeng Shao, Yannan Ji, Chi Zhang, Lei Liang, Junyi Ge, Zhen Guo, Jinhua Li, Qiang Li, Rainer Grün, and Chris Stringer**



**Title:**

Massive cranium from Harbin in northeastern China establishes a new Middle Pleistocene human lineage

**Authors:**

Xijun Ni<sup>1, 2, 3, 4\*</sup>, Qiang Ji<sup>1\*</sup>, Wensheng Wu<sup>1</sup>, Qingfeng Shao<sup>5</sup>, Yannan Ji<sup>6</sup>, Chi Zhang<sup>2, 4</sup>, Lei Liang<sup>1</sup>, Junyi Ge<sup>2, 4</sup>, Zhen Guo<sup>1</sup>, Jinhua Li<sup>7</sup>, Qiang Li<sup>2, 4</sup>, Rainer Grün<sup>8, 9</sup>, Chris Stringer<sup>10\*</sup>

**Addresses:**

1. Hebei GEO University, Shijiazhuang, Hebei Province, 050031, China
2. CAS Center for Excellence in Life and Paleoenvironment, Chinese Academy of Science, Beijing, 100044, China
3. CAS Center for Excellence in Tibetan Plateau Earth Sciences, Chinese Academy of Science, Beijing, 100104, China
4. University of Chinese Academy of Sciences, Beijing, 100049, China
5. Key Laboratory of Virtual Geographic Environment, Ministry of Education, Nanjing Normal University, Nanjing, 210023, China
6. China Geo-Environmental Monitoring Institute, Beijing, 100081, China
7. Key Laboratory of Earth and Planetary Physics, Innovation Academy for Earth Science, Chinese Academy of Sciences, Beijing 100029, China
8. Australian Research Centre for Human Evolution, Griffith University, Nathan, Queensland, Australia
9. Research School of Earth Sciences, The Australian National University, Canberra, ACT, Australia
10. Centre for Human Evolution Research, Department of Earth Sciences, Natural History Museum, London, UK

\*Correspondence: [jqiang@hgu.edu.cn](mailto:jqiang@hgu.edu.cn) (Q.J.), [nixijun@hgu.edu.cn](mailto:nixijun@hgu.edu.cn) (X.N.), [c.stringer@nhm.ac.uk](mailto:c.stringer@nhm.ac.uk) (C.S.)

|                                                                                                                                                                                                                                                                                                                                                                                                                                                                                                                                                                                                                                                                                                                                                                        |    |
|------------------------------------------------------------------------------------------------------------------------------------------------------------------------------------------------------------------------------------------------------------------------------------------------------------------------------------------------------------------------------------------------------------------------------------------------------------------------------------------------------------------------------------------------------------------------------------------------------------------------------------------------------------------------------------------------------------------------------------------------------------------------|----|
| <b>Story of the discovery</b> _____                                                                                                                                                                                                                                                                                                                                                                                                                                                                                                                                                                                                                                                                                                                                    | 7  |
| <b>Taxonomic scope</b> _____                                                                                                                                                                                                                                                                                                                                                                                                                                                                                                                                                                                                                                                                                                                                           | 7  |
| S-Table 1. Specimens used for comparison and phylogenetic analysis _____                                                                                                                                                                                                                                                                                                                                                                                                                                                                                                                                                                                                                                                                                               | 7  |
| <b>Three dimensional model building</b> _____                                                                                                                                                                                                                                                                                                                                                                                                                                                                                                                                                                                                                                                                                                                          | 12 |
| <b>Morphological data collection</b> _____                                                                                                                                                                                                                                                                                                                                                                                                                                                                                                                                                                                                                                                                                                                             | 12 |
| <b>Morphology of the Harbin cranium</b> _____                                                                                                                                                                                                                                                                                                                                                                                                                                                                                                                                                                                                                                                                                                                          | 12 |
| S-Figure 1. Left upper M <sup>2</sup> of the Harbin cranium. White bar indicates 10 mm. _____                                                                                                                                                                                                                                                                                                                                                                                                                                                                                                                                                                                                                                                                          | 14 |
| <b>Comparative morphology of the Harbin cranium</b> _____                                                                                                                                                                                                                                                                                                                                                                                                                                                                                                                                                                                                                                                                                                              | 15 |
| S-Table 2. Measurements of the Harbin cranium and comparisons with other Middle-Late Pleistocene <i>Homo</i> cranial fossils. Linear measurements in millimetres, angles in degrees, ratios ranged from 0 to 100. _____                                                                                                                                                                                                                                                                                                                                                                                                                                                                                                                                                | 16 |
| S-Figure 2. Frontal angle and parietal angle of the Harbin cranium compared with other Middle-Late Pleistocene <i>Homo</i> cranial fossils. Scales in <i>ln</i> -degrees. The <i>Homo erectus</i> group tends to have flat frontal and parietal bones (with larger frontal angles and parietal angles). The <i>Homo sapiens</i> group tends to have more arched frontal and parietal bones (with smaller frontal angles and parietal angles). Harbin and comparable Chinese fossils lie centrally in this figure. _____                                                                                                                                                                                                                                                | 21 |
| S-Figure 3. Parietal angle and occipital angle of the Harbin cranium compared with other Middle-Late Pleistocene <i>Homo</i> cranial fossils. Scales in <i>ln</i> -degrees. The <i>Homo erectus</i> group tends to have flat parietal bones (with larger parietal angles) and more angulated occipital bones (with smaller occipital angles). The <i>Homo sapiens</i> group tends to have more arched parietal bones (with smaller parietal angles) and flat occipital bones (with larger occipital angles). The Harbin, Dali, and Jinniushan crania fall in the range of the <i>Homo erectus</i> group. _____                                                                                                                                                         | 22 |
| S-Figure 4. Nasion-bregma angle and occipital angle of the Harbin cranium compared with other Middle-Late Pleistocene <i>Homo</i> cranial fossils. Scales in <i>ln</i> -degrees. The <i>Homo erectus</i> group tends to have smaller nasion-bregma angles and more arched occipital bones (with smaller occipital angles) than <i>Homo sapiens</i> . The <i>H. sapiens</i> group tends to have less angulated occipital bones (with larger occipital angles) and larger nasion-bregma angles. The Harbin, Dali, and Jinniushan crania fall in the range of the <i>H. erectus</i> group. _____                                                                                                                                                                          | 23 |
| S-Figure 5. Medial supraorbital torus thickness of the Harbin cranium compared with other Middle-Late Pleistocene <i>Homo</i> cranial fossils. Scales in <i>ln</i> -millimeters. The regression line fits on the data excluding <i>Homo sapiens</i> . The linear relationship between the maximum cranial length and the medial supraorbital torus thickness fits quite well within the archaic humans and excluding <i>H. sapiens</i> . The medial supraorbital torus thickness of <i>H. sapiens</i> is not correlated with the maximum cranial length, which can be used as a proxy of body size. The Harbin, Dali, and Jinniushan crania fall in the range of archaic humans, excluding <i>H. sapiens</i> , but have a small overlap with <i>H. sapiens</i> . _____ | 24 |
| S-Figure 6. Central supraorbital torus thickness of the Harbin cranium compared with other Middle-Late Pleistocene <i>Homo</i> cranial fossils. Scales in <i>ln</i> -millimeters. The regression line fits on the data excluding <i>Homo sapiens</i> . The linear relationship between the maximum cranial length and the central supraorbital torus thickness fits quite well within the archaic humans, excluding <i>H. sapiens</i> . The central supraorbital torus thickness of <i>H.</i>                                                                                                                                                                                                                                                                          |    |

*sapiens* is not correlated with the maximum cranial length, which can be used as a proxy of body size. The Harbin, Dali, and Jinniushan crania fall in the range of archaic humans, excluding *H. sapiens*, but have a small overlap with *H. sapiens*. \_\_\_\_\_ 25

S-Figure 7. Lateral supraorbital torus thickness of the Harbin cranium compared with other Middle-Late Pleistocene *Homo* cranial fossils. Scales in *ln*-millimeters. The regression line fits on the data excluding *Homo sapiens*. The linear relationship between the maximum cranial length and the lateral supraorbital torus thickness fits quite well within the archaic humans, excluding *H. sapiens*. The lateral supraorbital torus thickness of *H. sapiens* is not correlated with the maximum cranial length, which can be used as a proxy of body size. The Harbin, Dali, and Jinniushan crania fall in the range of archaic humans, excluding *H. sapiens*, but have a small overlap with *H. sapiens*. \_\_\_\_\_ 26

S-Figure 8. Bifrontomolare temporale breadth of the Harbin cranium compared with other Middle-Late Pleistocene *Homo* cranial fossils. Scales in *ln*-millimeters. The regression analysis indicates that all the humans examined here follow the same linear relationship between the bifrontomolare temporale breadth and the maximum cranial length. The Harbin cranium is well above the regression line, suggesting that it has a broader face relative to its cranial length. \_\_\_\_\_ 27

S-Figure 9. Biorbital breadth of the Harbin cranium compared with other Middle-Late Pleistocene *Homo* cranial fossils. Scales in *ln*-millimeters. The regression analysis indicates that all the humans examined here follow the same linear relationship between the biorbital breadth and the maximum cranial length. The Harbin cranium lies well above the regression line, suggesting that it has a broader face relative to its cranial length. \_\_\_\_\_ 28

S-Figure 10. Bizygomatic breadth of the Harbin cranium compared with other Middle-Late Pleistocene *Homo* cranial fossils. Scales in *ln*-millimeters. The regression analysis indicates that all the humans examined here follow the same linear relationship between the bizygomatic breadth and the maximum cranial length. The Harbin cranium lies well above the regression line, suggesting that it has a broader face relative to its cranial length. \_\_\_ 29

S-Figure 11. The basion angle and nasion angle of the Harbin cranium compared with other Middle-Late Pleistocene *Homo* cranial fossils. Scales in *ln*-degrees. The two angles do not show a significant linear relationship when all the data are grouped together. *Homo sapiens* tend to have smaller nasion and basion angles, corresponding to a low and retracted face. The Harbin, Dali and Jinniushan crania largely overlap the range of *H. sapiens*. \_\_\_\_\_ 30

S-Figure 12. The basion angles of the Harbin cranium and other Middle-Late Pleistocene *Homo* cranial fossils relative to the maximum cranial lengths. Scales in *ln*-degrees and *ln* millimeters. The basion angles do not show a significant linear relationship against the maximum cranial lengths. *Homo sapiens* tend to have smaller nasion and basion angles, corresponding to their low and retracted faces. The Harbin and Dali also have small basion and nasion angles. \_\_\_\_\_ 31

S-Figure 13. Postorbital constriction index of the Harbin cranium compared with other Middle-Late Pleistocene *Homo* cranial fossils. The postorbital constriction index is calculated as the quotient of least frontal breadth (M9) over biorbital breadth (M44). Notched boxes indicate the first quartiles (Q1s) and the third quartiles (Q3s). Whiskers indicate 1.5 times the interquartile range (IQR, IQR = Q3 – Q1). The notches indicate the medians. The widths of the boxes are proportional to the sample sizes. The postorbital constriction variation range of *Homo*



*sapiens* largely overlaps that of the Neanderthals. The Harbin cranium has a moderate postorbital constriction, well above the variation range of *Homo erectus*, but below the variation range of *H. sapiens* and the Neanderthals. It overlaps with those of the *Homo heidelbergensis/Homo rhodesiensis* group and the ungrouped archaic humans.

32

S-Figure 14. Postorbital constriction indices of the Harbin cranium and other Middle-Late Pleistocene *Homo* cranial fossils, relative to the maximum cranial lengths. Maximum cranial length is scaled in *ln* millimeters. Postorbital constriction index is calculated as the quotient of least frontal breadth (M9) over biorbital breadth (M44). Larger cranial lengths tend to have larger postorbital constriction indices. The postorbital constriction variation range of *Homo sapiens* largely overlaps that of the Neanderthals. The Harbin cranium has a relatively lower postorbital constriction index compared with the Neanderthal and *H. sapiens* groups.

33

S-Figure 15. The prosthion angle and nasion angle of the Harbin cranium compared with other Middle-Late Pleistocene *Homo* cranial fossils. Scales in *ln*-degrees. The two angles show a significant linear relationship. *Homo sapiens* have smaller nasion angles and larger prosthion angles, corresponding to lower prognathism. *Homo erectus* have larger nasion angles and smaller prosthion angles, corresponding to higher prognathism. The Harbin, Dali and Jinniushan crania fall in the range of *H. sapiens*.

34

S-Figure 16. The nasion angles of the Harbin cranium and other Middle-Late Pleistocene *Homo* cranial fossils relative to the maximum cranial lengths. Scales in *ln*-degrees and *ln* millimeters. The nasion angles show a weak linear relationship against the maximum cranial lengths. If *Homo erectus* and other humans are considered separately, the linear relationship does not show. *Homo sapiens* and Neanderthals show large overlaps. The Jinniushan and Dali crania are close to the ranges of *H. sapiens* and Neanderthals, while Harbin lies outside the range because of its huge size.

35

S-Figure 17. The prosthion angles of the Harbin cranium and other Middle-Late Pleistocene *Homo* cranial fossils relative to the maximum cranial lengths. Scales in *ln*-degrees and *ln* millimeters. The prosthion angles show a linear relationship against the maximum cranial lengths. If *Homo erectus* and other humans are considered separately, the linear relationship does not show. *Homo sapiens* and Neanderthals show large overlaps. The Jinniushan and Dali crania are close to the ranges of *H. sapiens* and Neanderthals, while Harbin lies outside the range because of its huge size.

36

S-Figure 18. The zygomaxillary angles of the Harbin cranium and other Middle-Late Pleistocene *Homo* cranial fossils relative to the maximum cranial lengths. Scales in *ln*-degrees and *ln* millimeters. The zygomaxillary angles show a linear relationship against the maximum cranial lengths. If *Homo erectus* and other humans are considered separately, the linear relationship does not show. Given the same maximum cranial length, *Homo sapiens* have larger zygomaxillary angles than Neanderthals. The Harbin, Jinniushan and Dali crania are closer to the range of *H. sapiens*.

37

**Characters for phylogenetic analysis** 37

**Parsimony analysis** 38

S-Figure 19. Majority-rule consensus tree of 25 most parsimonious trees. Number in front of a slash indicates the node number, while the number behind a slash indicates the Bremer support.

39

S-Figure 20. Majority-rule consensus trees of 55 most parsimonious trees. Backbone constraints were used to

|                                                                                                                                                                                                                                                                                                                                                                                                                                                                                                                                                                                                                                                                                                                                                                                                                                                                    |           |
|--------------------------------------------------------------------------------------------------------------------------------------------------------------------------------------------------------------------------------------------------------------------------------------------------------------------------------------------------------------------------------------------------------------------------------------------------------------------------------------------------------------------------------------------------------------------------------------------------------------------------------------------------------------------------------------------------------------------------------------------------------------------------------------------------------------------------------------------------------------------|-----------|
| force Xiahe as the sister group of Neanderthals and <i>H. antecessor</i> outside of the Neanderthal- <i>H. sapiens</i> clade. Number in front of a slash indicates the node number, while the number behind a slash indicates the Bremer support.                                                                                                                                                                                                                                                                                                                                                                                                                                                                                                                                                                                                                  | 40        |
| S-Table 3. Comparison between the most parsimonious phylogenetic tree and the backbone constrained phylogenetic tree                                                                                                                                                                                                                                                                                                                                                                                                                                                                                                                                                                                                                                                                                                                                               | 41        |
| S-Table 4. Synapomorphies shared by the Harbin human clade.                                                                                                                                                                                                                                                                                                                                                                                                                                                                                                                                                                                                                                                                                                                                                                                                        | 41        |
| S-Table 5. Synapomorphies shared by the <i>H. sapiens</i> clade.                                                                                                                                                                                                                                                                                                                                                                                                                                                                                                                                                                                                                                                                                                                                                                                                   | 42        |
| S-Table 6. Synapomorphies shared by the Neanderthal clade.                                                                                                                                                                                                                                                                                                                                                                                                                                                                                                                                                                                                                                                                                                                                                                                                         | 44        |
| S-Table 7. Synapomorphies shared by Harbin- <i>H. sapiens</i> clade                                                                                                                                                                                                                                                                                                                                                                                                                                                                                                                                                                                                                                                                                                                                                                                                | 46        |
| <b>Bayesian inference and tip-dating analyses</b>                                                                                                                                                                                                                                                                                                                                                                                                                                                                                                                                                                                                                                                                                                                                                                                                                  | <b>46</b> |
| S-Figure 21. Phylogeny of the 55 selected OTUs from the genus <i>Homo</i> . This timetree was inferred from the Bayesian tip-dating analysis using MrBayes 3.2.7 and summarized as the all-compatible tree. The tip-date for the Harbin cranium is set as 148±2 ka. To reduce the polytomy at some clades, the strict consensus of the most parsimonious trees from the parsimony analysis (S-Fig. 19) was used as a reference. The branches in red indicate the backbone constraints based on the most parsimonious trees. Branch lengths are proportional to the division age in thousand years. Numbers at the internal nodes are the median ages, and the blue bars indicate the 95% highest posterior density interval of the node ages.                                                                                                                      | 49        |
| S-Figure 22. Phylogeny of the 55 selected OTUs from the genus <i>Homo</i> . This timetree was inferred from the Bayesian tip-dating analysis using MrBayes 3.2.7 and summarized as the all-compatible tree. The tip-date for the Harbin cranium is set as 296±8 ka. To reduce the polytomy at some clades, the strict consensus of the most parsimonious trees from the parsimony analysis (S-Fig. 19) was used as a reference. The branches in red indicate the backbone constraints based on the most parsimonious trees. The branches in bold lines indicate the significant differences compared with the preferred phylogeny in S-Fig. 21. Branch lengths are proportional to the division age in thousand years. Numbers at the internal nodes are the median ages, and the blue bars indicate the 95% highest posterior density interval of the node ages.  | 50        |
| S-Figure 23. Phylogeny of the 55 selected OTUs from the genus <i>Homo</i> . This timetree was inferred from the Bayesian tip-dating analysis using MrBayes 3.2.7 and summarized as the all-compatible tree. The tip-date for the Harbin cranium is set as 59-304 ka. To reduce the polytomy at some clades, the strict consensus of the most parsimonious trees from the parsimony analysis (S-Fig. 19) was used as a reference. The branches in red indicate the backbone constraints based on the most parsimonious trees. The branches in bold lines indicate the significant differences compared with the preferred phylogeny in S-Fig. 21. Branch lengths are proportional to the division age in thousand years. Numbers at the internal nodes are the median ages, and the blue bars indicate the 95% highest posterior density interval of the node ages. | 51        |
| <b>Biogeographical analyses</b>                                                                                                                                                                                                                                                                                                                                                                                                                                                                                                                                                                                                                                                                                                                                                                                                                                    | <b>53</b> |
| S-Table 8. The geographic coordinates of the terminal OTUs.                                                                                                                                                                                                                                                                                                                                                                                                                                                                                                                                                                                                                                                                                                                                                                                                        | 53        |
| S-Table 9. Manual dispersal multipliers matrix assuming 3 distribution areas with equal dispersal rates among Africa, Europe and Asia                                                                                                                                                                                                                                                                                                                                                                                                                                                                                                                                                                                                                                                                                                                              | 56        |

|                                                                                                                                                                                                                                                                                                                                                                                                                                                                |           |
|----------------------------------------------------------------------------------------------------------------------------------------------------------------------------------------------------------------------------------------------------------------------------------------------------------------------------------------------------------------------------------------------------------------------------------------------------------------|-----------|
| S-Table 10. Manual dispersal multipliers matrix assuming 5 distribution areas with a southern dispersal route from Africa to Asia _____                                                                                                                                                                                                                                                                                                                        | 56        |
| S-Table 11. Manual dispersal multipliers matrix assuming 5 distribution areas with a northern dispersal route from Africa to Asia _____                                                                                                                                                                                                                                                                                                                        | 56        |
| S-Table 12. Comparison of different biogeographical models under the equal dispersal rate hypothesis _____                                                                                                                                                                                                                                                                                                                                                     | 57        |
| S-Table 13. Comparison of different biogeographical models under the south route dispersal hypothesis _____                                                                                                                                                                                                                                                                                                                                                    | 57        |
| S-Table 14. Comparison of different biogeographical models under the north route dispersal hypothesis _____                                                                                                                                                                                                                                                                                                                                                    | 58        |
| S-Figure 24. Distribution of event counts across 1000 biogeographical stochastic mappings (BSMs) generated under the DEC+j model. The maximum of the vertical axis is the 1000 BSMs. _____                                                                                                                                                                                                                                                                     | 59        |
| S-Table 15. Summary of biogeographical stochastic mapping (BSM) counts for the <i>Homo</i> species using the DEC+j model under 3 distribution areas with equal dispersal rate hypothesis. Means, standard deviations and summation are calculated from 1000 BSMs. _____                                                                                                                                                                                        | 60        |
| S-Table 16. Mean (SD) of the number of the founder-events (jump dispersal events) in the evolutionary history of the genus <i>Homo</i> , estimated with biogeographical stochastic mappings (BSMs). Counts of dispersal events were averaged across the 1000 BSMs. The ancestral state is referred to the place where a lineage dispersed from (the rows), and the descendant state is referred to the place where a lineage dispersed to (the columns). _____ | 60        |
| <b>References</b> _____                                                                                                                                                                                                                                                                                                                                                                                                                                        | <b>61</b> |
| <b>Appendix</b> _____                                                                                                                                                                                                                                                                                                                                                                                                                                          | <b>68</b> |
| Appendix 1. Continuous phenomic characters used for phylogenetic analysis _____                                                                                                                                                                                                                                                                                                                                                                                | 68        |
| Appendix 2. Discrete phenomic characters used for phylogenetic analysis _____                                                                                                                                                                                                                                                                                                                                                                                  | 82        |
| Appendix 3. Data matrix in TNT format for phylogenetic analysis _____                                                                                                                                                                                                                                                                                                                                                                                          | 99        |
| Appendix 4. TNT script for running multiple replications, using sectorial searches, drifting, ratchet and fusing combined _____                                                                                                                                                                                                                                                                                                                                | 130       |
| Appendix 5. TNT script for running multiple replications, using sectorial searches, drifting, ratchet and fusing combined, with backbone constraints _____                                                                                                                                                                                                                                                                                                     | 131       |
| Appendix 6. TNT script for calculating the Bremer Supports and Relative Bremer Supports _____                                                                                                                                                                                                                                                                                                                                                                  | 131       |
| Appendix 7. Synapomorphies mapping on the most-parsimonious phylogenetic tree. Characters are listed in Appendix 1 and Appendix 2. Node number are indicated in S-Figure 27. _____                                                                                                                                                                                                                                                                             | 133       |
| Appendix 8. Data matrix in NEXUS format for Bayesian tip-dating analyses _____                                                                                                                                                                                                                                                                                                                                                                                 | 214       |
| Appendix 9. MrBayes commands for tip-dating, with backbone partial constraints from the results of parsimony analysis _____                                                                                                                                                                                                                                                                                                                                    | 226       |
| Appendix 10. BioGeoBEARS script for model selection and Biogeographical Stochastic Mapping analyses _____                                                                                                                                                                                                                                                                                                                                                      | 231       |



## Story of the discovery

The Harbin cranium reported in this paper was allegedly discovered in 1933. A man (kept anonymous by his family), who worked for the Japanese occupiers as a labour contractor, discovered the cranium when his team of workers were constructing a bridge for the Japanese near Harbin City in northeastern China. The bridge was later named as Dongjiang Bridge. The man was shrewd and realized the potential value of the discovery, probably because the discovery of the first Peking Man cranium in 1929 had attracted huge interest in China. Instead of passing the cranium to his Japanese boss, he buried it in an abandoned well, a traditional Chinese method of concealing treasures. After the establishment of the modern Chinese republic, the man returned to farming and did his best to hide his experience as a labour contractor working for the Japanese invaders. With his difficult life experience, the man never had a chance to re-excavate his secret treasure. The cranium thus remained unknown to the public and science for decades, but it survived the Japanese invasion, the civil war, the communist movement, the cultural revolution, and rampant fossil dealing in recent years. The third generation of the man's family learnt of his secret discovery before his death and recovered the fossil in 2018. The corresponding author (Qiang Ji) learnt of the cranium, and successfully persuaded the family to donate the specimen to the Geoscience Museum of Hebei GEO University.

## Taxonomic scope

We scored and measured morphological characters from 95 cranial, mandibular or dental specimens of the *Homo* genus (S-Table 1). Specimens from the same locality and generally accepted as the same species/population were grouped into one operational taxonomic unit (OTU). After combination, 55 OTUs were used as terminal taxa for the phylogenetic and biogeographic analyses. The OTUs cover most of the major clades or forms of the *Homo* genus, including *H. habilis*, “*H. ergaster*”, *H. erectus*, *H. heidelbergensis*/*H. rhodesiensis*, *H. neanderthalensis* and *H. sapiens* (S-Table 1). For each terminal taxon/specimen, we use the most recently published dating results. For the combined terminal taxon, dates for all the specimens were used as an age range. The two crania from Yunxian China were not included because they are severely deformed. Although one of the two Yunxian crania (Yunxian II) was reconstructed based on CT scanning data<sup>1</sup>, the results still show obvious deformation and cracking. *Homo floresiensis*<sup>2</sup>, *Homo luzonensis*<sup>3</sup>, and *H. naledi* were also not included. These three species show strong plesiomorphic and apomorphic features that are rare or absent elsewhere in the genus *Homo*<sup>3</sup> and some researchers have noted similarities between these species and *Australopithecus*<sup>3-9</sup>.

S-Table 1. Specimens used for comparison and phylogenetic analysis

| OTUs*         | Specimens                                    | Specimen source**         | Assigned Age (ka) | Cranial capacity (ml) | Age Reference      | Cranial Capacity Reference |
|---------------|----------------------------------------------|---------------------------|-------------------|-----------------------|--------------------|----------------------------|
| Antecessor    | <i>H. antecessor</i> ATD6-15 ATD6-69 ATD6-96 | NHM replicas; IVPP AN2245 | 900000-800000     | 1000                  | Ref. <sup>10</sup> | Ref. <sup>11</sup>         |
|               | <i>H. antecessor</i> Dental                  |                           | 900000-800000     |                       | Ref. <sup>10</sup> |                            |
| Narmada       | <i>Homo</i> sp. Narmada                      | NHM replica; IVPP AN1631  | 780000-236000     | 1155-1421             | Ref. <sup>12</sup> | Ref. <sup>13</sup>         |
| Eliye Springs | <i>Homo</i> sp. Eliye Springs                | NHM replica               | 300000-200000     | 1170-1245             | Ref. <sup>14</sup> | Ref. <sup>15</sup>         |

|                     |                                     |                            |                   |              |                        |                          |
|---------------------|-------------------------------------|----------------------------|-------------------|--------------|------------------------|--------------------------|
| Ndutu               | <i>Homo</i> sp. Ndutu               | NHM replica                | 350000            | 1100         | Ref. <sup>16, 17</sup> | Ref. <sup>16, 17</sup>   |
| Irhoud 1,2          | <i>H. sapiens</i> Irhoud1           | NHM replica                | 349000-<br>281000 | 1369-1381    | Ref. <sup>18</sup>     | Ref. <sup>19</sup>       |
|                     | <i>H. sapiens</i> Irhoud2           | NHM replica                | 349000-<br>281000 | 1467-1473    | Ref. <sup>18</sup>     | Ref. <sup>19</sup>       |
| Florisbad           | <i>H. sapiens</i> Florisbad         | NHM replica                | 294000-<br>224000 | 1280         | Ref. <sup>20</sup>     | Ref. <sup>17, 21</sup>   |
| Omo II              | <i>H. sapiens</i> Omo II            | NHM replicas               | 195000            | 1487-1495    | Ref. <sup>19</sup>     | Ref. <sup>19</sup>       |
| LH 18               | <i>H. sapiens</i> LH18              | NHM replicas               | 150000-<br>120000 | 1232-1242    | Ref. <sup>19</sup>     | Ref. <sup>19</sup>       |
| Skhul V,IX          | <i>H. sapiens</i> Skhul V           | NHM replicas               | 115000            | 1362-1364    | Ref. <sup>19</sup>     | Ref. <sup>19</sup>       |
|                     | <i>H. sapiens</i> Skhul IX          | NHM replicas               | 115000            | 1400-1587.33 | Ref. <sup>19</sup>     | Ref. <sup>17, 22</sup>   |
| Qafzeh IX           | <i>H. sapiens</i> Qafzeh IX         | NHM replicas               | 115000            | 1492-1502    | Ref. <sup>19</sup>     | Ref. <sup>19</sup>       |
| Mladec I,II,V,VI    | <i>H. sapiens</i> Mladec I          | IVPP AN1961,<br>AN1628     | 3500              | 1606         | Ref. <sup>19</sup>     | Ref. <sup>22</sup>       |
|                     | <i>H. sapiens</i> Mladec II         | NHM replica                | 35000             | 1390         | Ref. <sup>19</sup>     | Ref. <sup>22</sup>       |
|                     | <i>H. sapiens</i> Mladec V          | NHM replica                | 35000             | 1500-1650    | Ref. <sup>19</sup>     | Ref. <sup>17, 22</sup>   |
|                     | <i>H. sapiens</i> Mladec VI         | NHM replica                | 35000             |              | Ref. <sup>19</sup>     |                          |
| Cro-Magnon I,II,III | <i>H. sapiens</i> Cro-Magnon I      | NHM replicas               | 31000             | 1573-1575    | Ref. <sup>19</sup>     | Ref. <sup>19</sup>       |
|                     | <i>H. sapiens</i> Cro-Magnon II     |                            | 31000             |              | Ref. <sup>19</sup>     |                          |
|                     | <i>H. sapiens</i> Cro-Magnon III    | NHM replica                | 31000             | 1781-1845    | Ref. <sup>19</sup>     | Ref. <sup>19</sup>       |
| Oase 1,2            | <i>H. sapiens</i> Oase1             | IVPP AN2250-2              | 41470-<br>39410   |              | Ref. <sup>23</sup>     |                          |
|                     | <i>H. sapiens</i> Oase2             | IVPP AN2250-1              | 41470-<br>39410   | 1400-1500    | Ref. <sup>23</sup>     | This research            |
| ZKD UC101,103       | <i>H. sapiens</i> Upper Cave 101    | IVPP AN59,<br>AN62         | 27000             | 1500         | Ref. <sup>24</sup>     | Ref. <sup>24</sup>       |
|                     | <i>H. sapiens</i> Upper Cave 103    | IVPP AN61                  | 27000             | 1290-1300    | Ref. <sup>24</sup>     | Ref.; Ref. <sup>22</sup> |
| Liujiang            | <i>H. sapiens</i> Liujiang          | IVPP PA89                  | 67000             | 1567         | Ref. <sup>24</sup>     | Ref. <sup>24</sup>       |
| SH 4,5              | <i>H. neanderthalensis</i> SH4      |                            | 430000            | 1360         | Ref. <sup>25</sup>     | Ref. <sup>26</sup>       |
|                     | <i>H. neanderthalensis</i> SH5      | NHM replica;               | 430000            | 1092         | Ref. <sup>25</sup>     | Ref. <sup>26</sup>       |
|                     |                                     | IVPP AN2183-1,<br>AN2183-2 |                   |              |                        |                          |
| Tabun 1             | <i>H. neanderthalensis</i> Tabun C1 | NHM original               | 122000-<br>100000 | 1270.5-1271  | Ref. <sup>17</sup>     | Ref. <sup>17, 22</sup>   |
| Tabun 2             | <i>H. sapiens</i> Tabun C2          | NHM replica                | 122000-           |              | Ref. <sup>17</sup>     |                          |

|                        |                                                                 |                            |                   |           |                                      |                                       |
|------------------------|-----------------------------------------------------------------|----------------------------|-------------------|-----------|--------------------------------------|---------------------------------------|
| Spy I,II               | <i>H. neanderthalensis</i><br>spy ii                            | NHM replicas               | 100000<br>40000   | 1278-1296 | Ref. <sup>19</sup>                   | Ref. <sup>19</sup>                    |
|                        | <i>H. neanderthalensis</i><br>Spy II                            |                            | 40000             | 1524-1538 | Ref. <sup>19</sup>                   | Ref. <sup>19</sup>                    |
| Gibraltar 1            | <i>H. neanderthalensis</i><br>Gibraltar1 (=Forbes'<br>Quarry 1) | NHM original               | 75000             | 1209-1217 | Ref. <sup>19</sup>                   | Ref. <sup>19</sup>                    |
| Amud                   | <i>H. neanderthalensis</i><br>Amud                              | NHM replicas               | 53000             | 1731-1763 | Ref. <sup>19</sup>                   | Ref. <sup>19</sup>                    |
| La Chapelle aux Saints | <i>H. neanderthalensis</i><br>La Chapelle aux Saints            | IVPP AN2301-1,<br>AN2301-2 | 52000             | 1487-1493 | Ref. <sup>19</sup>                   | Ref. <sup>19</sup>                    |
| La Ferrassie 1         | <i>H. neanderthalensis</i><br>La Ferrassie1                     | NHM replica                | 70000             | 1638-1648 | Ref. <sup>19</sup>                   | Ref. <sup>19</sup>                    |
| Shanidar 1,5           | <i>H. neanderthalensis</i><br>Shanidar1                         | NHM replica                | 50000             | 1650      | Ref. <sup>16, 17</sup>               | Ref. <sup>16, 17</sup>                |
|                        | <i>H. neanderthalensis</i><br>Shanidar5                         | NHM replica                | 50000             | 1550      | Ref. <sup>16, 17</sup>               | Ref. <sup>16, 17</sup>                |
| St Césaire             | <i>H. neanderthalensis</i> St<br>Césaire                        | NHM replicas               | 41950-<br>40660   |           | Hublin et al.,<br>2012 <sup>27</sup> |                                       |
| Saccopastore I,II      | <i>H. neanderthalensis</i><br>Saccopastore I                    | NHM replica                | 250000            | 1234.3    | Ref. <sup>16, 17</sup>               | Ref. <sup>16, 17</sup>                |
|                        | <i>H. neanderthalensis</i><br>Saccopastore II                   | NHM replica                | 250000            | 1295      | Ref. <sup>16, 17</sup>               | Ref. <sup>16, 17</sup>                |
| Neanderthal type       | Neanderthal 1                                                   | NHM replica                | 42000             | 1337.8    | Ref. <sup>16, 17</sup>               | Ref. <sup>16, 17</sup>                |
| Xiahe                  | <i>Homo</i> sp. Xiahe                                           | IVPP replica               | 155000-<br>164500 |           | Chen et al.,<br>2019 <sup>28</sup>   |                                       |
| Dali                   | <i>Homo</i> sp. Dali                                            | IVPP AN1369                | 267700-<br>258300 | 1120      | Sun et al.,<br>2017 <sup>29</sup>    | Wu and Athreya,<br>2013 <sup>30</sup> |
| Hualongdong            | <i>Homo</i> sp.<br>Hualongdong                                  | IVPP<br>Hualongdong        | 331000-<br>275000 | 1150      | Ref. <sup>31</sup>                   | Ref. <sup>31</sup>                    |
| Harbin                 | <i>Homo</i> sp. Harbin                                          | HBSM2018-<br>000018(A)     | 225000-<br>221000 | 1400      | This research                        | This research                         |
| Jinniushan             | <i>Homo</i> sp. Jinniushan                                      | IVPP AN2118                | 310000-<br>200000 | 1390      | Ref. <sup>24</sup>                   | Ref. <sup>24</sup>                    |
| Maba                   | <i>Homo</i> sp. Maba                                            | IVPP AN629                 | 278000-<br>230000 | 1300      | Ref. <sup>32</sup>                   | Ref. <sup>33</sup>                    |
| Xuchang                | <i>Homo</i> sp. Xuchang                                         | IVPP replica               | 125000-<br>105000 | 1800      | Ref. <sup>34</sup>                   | Ref. <sup>34</sup>                    |
| Mauer 1                | <i>H. heidelbergensis</i> /<br><i>H. rhodesiensis</i> Mauer 1   | NHM replica                | 649000-<br>569000 |           | Ref. <sup>35</sup>                   |                                       |

|                             |                                                                  |              |               |               |                        |                            |
|-----------------------------|------------------------------------------------------------------|--------------|---------------|---------------|------------------------|----------------------------|
| Arago<br>II,XIII,XXI,XLVII  | <i>H. heidelbergensis/H. rhodensis</i> Arago XXI XLVII           | NHM replicas | 469000-407000 | 1138.667-1166 | Ref. <sup>36</sup>     | Ref. <sup>17, 22</sup>     |
|                             | <i>H. heidelbergensis/H. rhodensis</i> Arago XIII                | NHM replicas | 469000-407000 |               | Ref. <sup>36</sup>     |                            |
|                             | <i>H. heidelbergensis/H. rhodensis</i> Arago II                  | NHM replicas | 469000-407000 |               | Ref. <sup>36</sup>     |                            |
| Broken Hill                 | <i>H. heidelbergensis/H. rhodensis</i> Broken Hill               | NHM E 686    | 324000-274000 | 1249          | Ref. <sup>37</sup>     | Ref. <sup>19</sup>         |
| Petralona 1                 | <i>H. heidelbergensis/H. rhodensis</i> Petralona1                | NHM replica  | 400000-150000 | 1160-1164     | Ref. <sup>19</sup>     | Ref. <sup>19</sup>         |
| Ceprano                     | <i>H. heidelbergensis/H. rhodensis</i> Ceprano                   | NHM replica  | 850000-400000 | 1185          | Ref. <sup>16, 17</sup> | Ref. <sup>16, 17</sup>     |
| Steinheim                   | <i>H. heidelbergensis/H. rhodensis</i> Steinheim S11             | NHM replica  | 300000        | 1111.192      | Ref. <sup>16, 17</sup> | Ref. <sup>16, 17</sup>     |
| Saldanha                    | <i>H. heidelbergensis/H. rhodensis</i> Saldanha (=Elandsfontein) | NHM replicas | 500000-350000 | 1216.667      | Ref. <sup>16, 17</sup> | Ref. <sup>16, 17</sup>     |
| Bodo                        | <i>H. heidelbergensis/H. rhodensis</i> Bodo                      | NHM replica  | 600000        | 1200-1325     | Ref. <sup>16, 17</sup> | Ref. <sup>38</sup>         |
| Ternifine 1,2,3,4           | <i>H. heidelbergensis/H. rhodensis</i> Ternifine1                | NHM replica  | 750000        |               | Ref. <sup>21</sup>     |                            |
|                             | <i>H. heidelbergensis/H. rhodensis</i> Ternifine2                | NHM replica  | 750000        |               | Ref. <sup>21</sup>     |                            |
|                             | <i>H. heidelbergensis/H. rhodensis</i> Ternifine3                | NHM replica  | 750000        |               | Ref. <sup>21</sup>     |                            |
|                             | <i>H. heidelbergensis/H. rhodensis</i> Ternifine4                | NHM replica  | 750000        | 1300          | Ref. <sup>21</sup>     | Ref. <sup>16, 17, 21</sup> |
| Peking<br>X,XII,XIII,LII,RC | <i>H. erectus</i> Peking X                                       | IVPP AN1     | 580000-280000 | 1225          | Ref. <sup>24, 39</sup> | Ref. <sup>24</sup>         |
|                             | <i>H. erectus</i> Peking XII                                     | IVPP AN3     | 580000-280000 | 1030          | Ref. <sup>24, 39</sup> | Ref. <sup>24</sup>         |
|                             | <i>H. erectus</i> Peking XIII                                    | IVPP AN55    | 580000-       |               | Ref. <sup>24, 39</sup> |                            |

|                     |                                     |                          |                 |           |                                |                        |
|---------------------|-------------------------------------|--------------------------|-----------------|-----------|--------------------------------|------------------------|
|                     |                                     |                          | 280000          |           |                                |                        |
|                     | <i>H. erectus</i> Peking LII        | IVPP AN22                | 580000-280000   |           | Ref. <sup>24, 39</sup>         |                        |
|                     | <i>H. erectus</i> Peking RC1996     | IVPP AN742-1, AN742-2    | 580000-280000   | 1030      | Ref. <sup>24, 39</sup>         | Ref. <sup>24</sup>     |
| Nanjing 1           | <i>H. erectus</i> Nanjing1          | IVPP AN1353              | 620000-580000   | 876       | Ref. <sup>24</sup>             | Ref. <sup>24</sup>     |
| Hexian              | <i>H. erectus</i> Hexian            | IVPP AN1368              | 437000-387000   | 1025      | Cui and Wu, 2015 <sup>40</sup> | Ref. <sup>24</sup>     |
| Sambungmacan 1,3    | <i>H. erectus</i> Sambungmacan1     | NHM replica              | 200000          |           | Ref. <sup>19</sup>             |                        |
|                     | <i>H. erectus</i> Sambungmacan3     | NHM replica              | 200000          | 898-906   | Ref. <sup>19</sup>             | Ref. <sup>19</sup>     |
| Sangiran 2,17       | <i>H. erectus</i> Sangiran2         | NHM replica              | 1500000-1300000 | 789-797   | Ref. <sup>19</sup>             | Ref. <sup>19</sup>     |
|                     | <i>H. erectus</i> Sangiran17        | NHM replica              | 1500000-1300000 | 1020      | Ref. <sup>19</sup>             | Ref. <sup>16, 17</sup> |
| Ngandong 7,9,12     | <i>H. erectus</i> Ngandong 7        | IVPP AN166               | 117000-108000   | 1013      | Ref. <sup>41</sup>             | Ref. <sup>22</sup>     |
|                     | <i>H. erectus</i> Ngandong 9        | IVPP AN345               | 117000-108000   |           | Ref. <sup>41</sup>             |                        |
|                     | <i>H. erectus</i> Ngandong 12       | IVPP AN170               | 117000-108000   | 1127      | Ref. <sup>41</sup>             | Ref. <sup>22</sup>     |
| Dmanisi             | <i>H. erectus</i> Dmanisi 211 2282  | NHM replicas             | 1770000         | 650       | Ref. <sup>42</sup>             | Ref. <sup>42</sup>     |
|                     | <i>H. erectus</i> Dmanisi 2280      | IVPP AN2181              | 1770000         | 730       | Ref. <sup>42</sup>             | Ref. <sup>42</sup>     |
|                     | <i>H. erectus</i> Dmanisi 2700 2735 | NHM replicas             | 1770000         | 601       | Ref. <sup>42</sup>             | Ref. <sup>42</sup>     |
|                     | <i>H. erectus</i> Dmanisi 4500 2600 | NHM replicas             | 1770000         | 546       | Ref. <sup>42</sup>             | Ref. <sup>42</sup>     |
| Rabat               | <i>Homo</i> sp. Rabat               | IVPP AN1288              | 300000          |           | Ref. <sup>43, 44</sup>         |                        |
| STW53               | <i>Homo</i> sp. STW53               | NHM replica              | 1900000         | 570       | Ref. <sup>16, 17</sup>         | Ref. <sup>16, 17</sup> |
| OH 9                | <i>H. erectus</i> OH9               | NHM replica; IVPP AN748  | 1470000         | 1009-1017 | Ref. <sup>19</sup>             | Ref. <sup>19</sup>     |
| Turkana ER3733,3883 | <i>H. erectus</i> Turkana           | NHM replicas             | 1535000         | 846-854   | Ref. <sup>19</sup>             | Ref. <sup>19</sup>     |
|                     | <i>H. erectus</i> ER 3733           | NHM replica              | 1780000         | 876-880   | Ref. <sup>19</sup>             | Ref. <sup>19</sup>     |
|                     | <i>H. erectus</i> ER 3883           | NHM replica              | 1570000         | 837-839   | Ref. <sup>19</sup>             | Ref. <sup>19</sup>     |
| Habilis             | <i>H. habilis</i> OH24              | NHM replica; IVPP AN2179 | 1800000         | 597       | Ref. <sup>16, 17</sup>         | Ref. <sup>16, 17</sup> |
| OH7,OH24,ER1805     | <i>H. habilis</i> OH7               | NHM replica;             | 1780000         |           | Ref. <sup>16, 17</sup>         | Ref. <sup>16, 17</sup> |



|  |                          |                             |         |     |                        |                        |
|--|--------------------------|-----------------------------|---------|-----|------------------------|------------------------|
|  | <i>H. habilis</i> ER1805 | IVPP AN2292<br>NHM replicas | 1850000 | 616 | Ref. <sup>16, 17</sup> | Ref. <sup>16, 17</sup> |
|--|--------------------------|-----------------------------|---------|-----|------------------------|------------------------|

\* OTUs: operational taxonomy units. \*\* NHM: Natural History Museum, London; IVPP: Institute of Vertebrate Paleontology and Paleoanthropology; HBSM: Hebei Science Museum.

### Three dimensional model building

The Harbin, Hexian, and Liujiang crania were CT scanned using the High Resolution CT facilities at the Key Laboratory of Vertebrate Evolution and Human Origins of the Chinese Academy of Sciences. The resolution ranges from 60 micrometers to 160 micrometers. X-ray CT images were exported to VG Studio Max 3.2 to build three dimensional models. Other casts and fossils compared and scored in this research were surface scanned by using the Arctec Space Spider surface scanner with a 3D point accuracy up to 50 micrometers.

### Morphological data collection

Character state scoring and linear and angular measurements were taken at the specimen level. Most of the 234 discrete characters are widely used and discussed in palaeoanthropological researches (e.g. in the resources of ref.<sup>26, 42, 45-50</sup>). We revised and re-defined the characters, and presented illustrations for those not in outright or unmistakable definition. The continuous characters include 184 linear measurements, 22 angles and 194 ratios. The ratios are derived from the linear measurements. The linear and angular measurements were taken following the standards defined by Martin<sup>51</sup> and Howells<sup>52</sup>. X-ray CT images and the surface models were exported to VG Studio Max 3.2, and all the measurements were taken from the digital 3D models in VG Studio Max 3.2. It has long been recognized that dental traits are not simply discrete. Most of the gross morphology of hominid dentitions shows extensive variation. The wide range of variation should be scored on a ranked scale. Here, the morphological traits of the permanent upper and lower dentitions of *Homo* fossils were scored by using the standard of the Arizona State University Dental Anthropology System<sup>53</sup>. This ranking system is widely accepted as a standard<sup>54, 55</sup>, and it has been used to infer the phylogenetic relationships of hominids<sup>56</sup>.

Discrete character definitions, linear and angle measurement standards, original scoring and measurements are stored in MorphoBank, which is a publicly available web application and database widely used for large-scale, online morphological character standardization and data collection<sup>57</sup>. To standardize the characters, scoring and measurements, we used the labeling tools of MorphoBank (Morphobank Project 3385) to illustrate the anatomical features and homology. By following the methods of scoring in ref.<sup>58</sup>, we loaded and labelled medial to document the exemplars of the characters and measurements, and recorded how the states of discrete characters looked in each specimen. Two hundred and thirty-four discrete characters and 321 continuous characters were defined and scored or measured for the 95 *Homo* specimens. In total, 1379 media, 9618 labels and 22042 cell scorings were input in MorphoBank Project 3385.

### Morphology of the Harbin cranium

The Harbin cranium is undistorted and almost intact, with the main losses being all but one tooth (the left M<sup>2</sup>), and slight damage to the left zygomatic arch (Fig. 2). It is massive in size, showing the largest values in our comparative fossil database (S-Table 2) for measurements such as maximum cranial length, nasio-occipital length and supraorbital torus breadth, and the second largest values for measurements like biauricular breadth, frontal chord, zygomatic breadth and biorbital breadth. We have presented only limited data from the internal morphology of the

Harbin cranium, as these will be presented in additional studies.

The cranial vault is voluminous (~1420 ml capacity, measured using high-resolution CT scanning and 3D reconstruction of the endocranial cast) and is relatively long and low in lateral view, with a receding frontal and evenly curved parietal contour. There are very small angular tori inferiorly on the parietals, and a relatively rounded occipital profile, lacking both the flexed form typical of *H. erectus*, and the protruding chignon found in many Neanderthals. However, the occipital surfaces are slightly raised compared with the parietals along their common sutures. The upper scale of the occipital bone is slightly longer than the lower, and they meet at a minimally developed occipital torus. The temporal line parallels the upper border of the high temporal squama, and the zygomatic arches are long and relatively slender. There are prominent mastoid processes, which incline slightly forwards and inwards. The external auditory meatus is high and narrow. The anteroinferior tympanic plate is flat and moderately thick. In lateral view the face is relatively low in height and lacks the total anterior projection typical of *H. erectus* and *H. heidelbergensis*/*H. rhodesiensis*, and there is a deep nasal root beneath a strong supraorbital torus. The zygomaxillary region is flat and faces anteriorly, but there is alveolar prognathism below.

In facial view (Fig. 2B,C), the frontal bone has an evenly curved superior profile, without obvious keeling or parasagittal flattening. The supraorbital torus is very wide and massively developed, but with a slight lateral reduction in thickness. There is a horizontal shelf of bone above and behind the prominent glabella, where a small vertical furrow partly separates the right and left components of the browridge, and the torus curves downwards from about the midpoint of the orbits. The inferior borders of the torus are near horizontal until midorbit, where they also start to curve downwards more strongly laterally. The upper face is extremely wide, with large and almost square-looking orbits, separated by a wide interorbital area with a rather flat nasal saddle, recessed below glabella. The lateral portions of the cheekbones are flat and quite low, with shallow canine fossae. There are inferior prominences at the zygomaxillary suture, and small notches mesially before the anterior surface meets the alveolar portion. The infraorbital foramina are placed quite high and mesial with only a small associated furrow extending below. The lower nasal region and maxillae lie well forward of the cheekbones, but there is none of the maxillary inflation found in Neanderthals and some *H. heidelbergensis*/*H. rhodesiensis* crania. The nasal aperture is very wide inferiorly, and almost triangular, but nasal and facial height are relatively low compared with the upper facial breadth. The anterior nasal spine is broken but bifid. A blunt spinal crest passes laterally and produces two branches. One branch merges with the sharp edge of the aperture, while the other trends posterolaterally, where it merges with the nasal wall. The nasal margin descends externally to a shallow, crescent-shaped sill, reaching to the damaged incisor sockets. The internal nasal floor is depressed and smooth, curving upwards centrally to the preserved parts of the bony nasal septum but almost horizontal proceeding internally. The internal nasal volume is very large.

In superior view (Fig. 2E), the cranium is widest in the supramastoid area, and the frontal bone narrows behind the wide supraorbital torus, but post-orbital constriction is not as marked as in *H. erectus* and *H. heidelbergensis*/*H. rhodesiensis* fossils. The torus recedes in an even curve laterally. In posterior view the cranium is also widest in the supramastoid area, below which the well-developed mastoid processes slope inwards. The temporals and parietals do not converge strongly as in *H. erectus* fossils, but there is no upper parietal expansion, as found in recent *H. sapiens*, nor the 'en bombe' shape typical of Neanderthals. There is no keeling near bregma, but there are slight depressions in the surface of the left parietal near bregma, perhaps indicative of healed trauma. The occipital bone has no central protuberance or suprainiac depression, and the occipital torus is a weak and low ridge of bone which becomes slightly more salient towards the mastoid region.

The inferior view (Fig. 2F) illustrates the extreme breadth of the cranial base and palate, which is U-shaped and

shallow, with thick alveolar bone. The incisor sockets are angled, suggesting there was alveolar prognathism. The incisive fossa is situated just behind the incisor roots, and a channel leading into the posteriorly directed incisive canal is formed behind the septum that separated the central incisors. The premolar sockets suggest only single-rooted teeth, while the  $M^1$  sockets show one very large and splayed lingual root socket and two smaller buccals. The preserved  $M^2$  is exceptionally large (mesiodistal length 13.6, buccolingual breadth 16.6), bigger than all the other comparative specimens except the  $M^{2/3}$  from Denisova Cave<sup>59,60</sup>. This tooth (and its antimere, to judge from the preserved sockets) has three roots, with the lingual one much larger. The Xiahe lower molars cannot be compared directly, but their large size matches the Harbin upper molar quite well. In occlusal view, the tooth has a nearly oval shape. The crown is deeply worn, generating a flat crown surface (S-Fig. 1). A small dentine facet is exposed on the protocone, and a large dentine facet on the paracone. The mesial side of the tooth has a flat contact facet for the  $M^1$ . The distal side is round and smooth, without any trace of a contact facet. Given the quite deep wear stage and the lack of a distal contact facet, the  $M^3$  was either very small or absent. The protocone (mesiolingual cusp, cusp 1) of the tooth is massive, occupying nearly half of the tooth. The mesiolingual side of the protocone is round and smooth. There is no trace of a Carabelli's cusp. The paracone (mesiolabial cusp, cusp 2) is slightly smaller than the protocone. Its labial side is round and smooth. The metacone (distolabial cusp, cusp 3) is very reduced, presenting as a ridge-like cusp without a free apex. The labial side of the metacone is small. The groove separating the paracone and metacone is distally positioned. A faint mesostyle (sometime called a parastyle) is present at the base of this groove. The hypocone (distolingual cusp, cusp 4) was probably moderately developed. Because of wear, no groove is present to show the boundary between the protocone and hypocone.

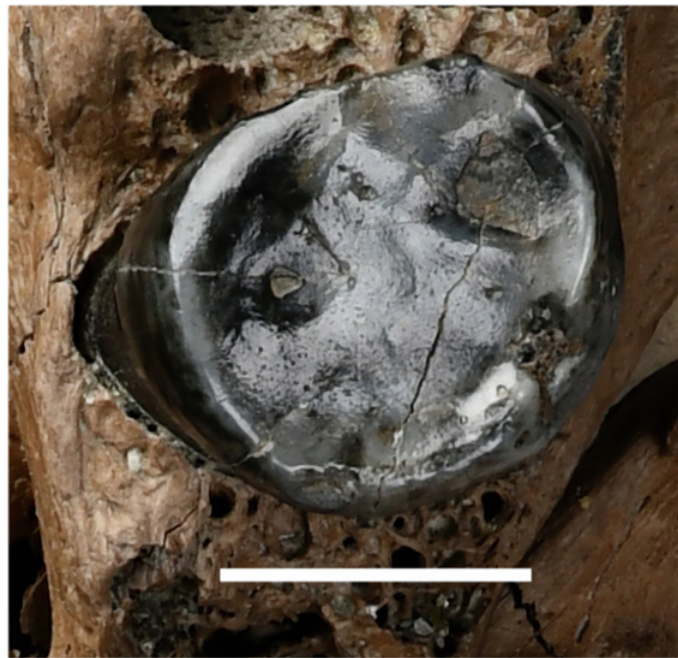

S-Figure 1. Left upper  $M^2$  of the Harbin cranium. White bar indicates 10 mm.

The zygomaticoalveolar root emerges from the region of the  $P^4$ - $M^1$ , and recedes slightly as it progresses laterally. The pterygoid processes are sloping and elongated, with relatively thickened bone. The supramastoid crest is mound-

like and stronger on the right side, and extends forward to overhang the auditory opening. Here it contributes to form a shelf above the recessed auditory meatus, from which the wide root of the zygomatic process emerges, distal to the mandibular fossa. The mandibular fossae are wide and quite deep, but the tympanic plates and petrous bones are not robustly built, and only slightly angled in relation to each other. A forwardly inclined sphenoid spine is preserved on the left side and fused to the tympanic, but broken off on the right. There is a well-marked, long and straight digastric fossa mesial to the mastoid processes, but this region lacks the prominent occipitomastoid crest found in Neanderthals. The foramen magnum is oval and broad, and the occipital condyles are long, while the nuchal plane is extensive and relatively flat, traversed by an external occipital crest, and bordered posteriorly by the modest occipital torus.

### **Comparative morphology of the Harbin cranium**

The Harbin cranium clearly represents an archaic human. The cranial vault lacks the globularity of the modern human braincase, with a low frontal and parietal bone. The frontal, parietal, occipital and nasion-bregma angles, as the metrical proxies of globularity, fall in the range of archaic humans, including the *H. erectus* group (S-Fig. 2-4). The supraorbital torus is massive and continuous. As in archaic humans, the thickness of the supraorbital torus is proportionally greater than that of later *H. sapiens* (S-Fig. 5-7). The base and upper face are extremely broad, and there is no upper parietal expansion in posterior view. Relative to the maximum cranial length, the frontomale, biorbital and zygomatic breadths are all well above the averages for the genus *Homo* (S-Fig. 8-10). However, in contrast, the face height is very low and the basion angle-nasion angle plot indicates that the Harbin cranium is much closer to *H. sapiens* than to *H. erectus* and *H. heidelbergensis/H. rhodesiensis* (S-Fig. 11-12). The single molar tooth is enormous, approached but not matched in size by those of some early *H. sapiens* fossils.

The large endocranial volume differentiates the Harbin cranium from primitive *Homo* species such as *H. erectus*, *H. naledi* and *H. floresiensis*, and this is reflected in almost parallel-sided temporals and parietals in posterior view, and only moderate postorbital constriction. The postorbital constriction index of the Harbin cranium is lower than those of Neanderthals and *H. sapiens*, but higher than in most members of the *H. erectus* group (S-Fig. 10, 11). The fossil lacks an angular cranial vault with buttressing and keeling, the occipital torus is only minimally developed, and the tympanic bone lacks the robusticity typical of *H. erectus*. The face does not show the total prognathism found in archaic *Homo* species. Together with the Dali and Jinniushan crania, the range of the prosthion angle and nasion angle of these three humans overlaps that of *H. sapiens* (S-Fig. 12-14).

Compared with Neanderthals, the Harbin cranium has a similarly massive supraorbital torus, with strong lateral thickness. Relative to the maximum cranial length, the supraorbital torus of Harbin has a similar central and lateral thickness to Neanderthals (S-Fig. 3-4), but its medial thickness is even larger (S-Fig. 2). In lateral view the occipital profile of the Harbin cranium is more arched, with a much smaller occipital angle (S-Fig. 3-4). In posterior view the cranium lacks the 'en bombe' shape, as well as a centrally developed suprainiac fossa. These two features are typically present in the Neanderthals. The midface projection is strong, but lacks the maxillary inflation found in Neanderthals. In contrast, the cheekbones are low, transversely flattened, and with an incurved inframalar region. The zygomaxillary angle is slightly larger than in Neanderthals and approaches that of *H. sapiens*. Relative to their maximum cranial lengths, the Harbin, Dali, Jinniushan and most *H. sapiens* crania show larger zygomaxillary angles (S-Fig. 15), corresponding to their flatter faces compared with the Neanderthals. The single molar tooth is huge by Neanderthal standards.

Comparisons with *H. antecessor* are limited by the incompleteness of the Spanish fossils, and despite similarities in zygomaxillary shape, the massive supraorbital development, large endocranial volume, high upper face width and huge M<sup>2</sup> set Harbin apart. Compared to *H. heidelbergensis/H. rhodesiensis*, the Harbin cranium lacks the strong transverse torus

and angulation of the occipital. The cheekbones do not show the inflation typically seen in Neanderthals and some large specimens of *H. heidelbergensis*/*H. rhodesiensis*. The midface projection is moderate, weaker than those in the Broken Hill, Arago and Steinheim fossils (S-Fig. 11, 12).

The Harbin cranium shows resemblances to Dali, Hualongdong, Jinniushan and other Middle Pleistocene Asian archaic humans, particularly illustrated using conventional metrics and cranial angles (S-Table 2, S-Fig. 2-18). Differing from the Dali cranium<sup>30,61</sup>, the Harbin cranium lacks sagittal keeling, presents relatively larger orbits, thinner and smoother supraorbital tori, weaker superciliary arch and weaker lateral thinning. Compared with the more gracile Jinniushan cranium, the anterior maxillary region of the Harbin cranium is proportionally broader. The orbits are much larger and more squared, the supraorbital tori are thicker, and the single preserved molar is much larger than in Jinniushan. The adolescent Hualongdong<sup>31</sup> is more similar to the Dali cranium than to the Harbin cranium. The Hualongdong cranium has strong frontal sagittal keeling. The supraorbital tori of Hualongdong are thicker and show significant lateral thinning. The superciliary arch is very strong. Compared with the Xuchang cranium<sup>34</sup>, the Harbin cranium has a much smaller cranial capacity, but with a more elevated frontal squama. The bones of the braincase of Harbin are much thicker. Overall the Xuchang cranium is more gracile. Its supraorbital tori are much thinner, and its mastoid processes are much smaller. The Maba partial cranium is as gracile, with thinner frontal and parietal, as the Xuchang and Jinniushan fossils. The preserved supraorbital torus of Maba is very Neanderthal-like<sup>33,62</sup>. It is thinner and more curved. The nasal bone of Maba is more projecting, another feature of Maba similar to the Neanderthals.

Overall, the Harbin cranium shows a distinctive combination of traits, and probably represents a distinct species of *Homo* from other designated Middle-Late Pleistocene human taxa such as *H. sapiens*, *H. neanderthalensis* and *H. heidelbergensis/rhodesiensis*. Its enormous overall size sets it apart from nearly every other fossil, with the highest values recorded for dimensions like maximum cranial length, nasio-occipital length and supraorbital torus breadth, and it is matched or exceeded only by fossils such as Xuchang (biauricular breadth), Ceprano (bizygomatic breadth), Cro-Magnon 3 (frontal chord), Saccopastore 2 (biorbital breadth) and Denisova (molar size). In terms of cranial vault proportions, the braincase clearly overlaps in shape with those of other large-sized late archaic *Homo* species, although the relatively and absolutely long frontal chord seems more *H. sapiens*-like. However the face, despite its enormous breadth dimensions, is relatively low in height and has a *H. sapiens* and *H. antecessor*-like zygomaxillary shape. It is also hafted onto the braincase with reduced prognathism, as in recent humans. In its combination of traits Harbin is more like fossils attributed to early *H. sapiens*, such as Jebel Irhoud 1 and Eliye Springs, than like later members of our lineage.

S-Table 2. Measurements of the Harbin cranium and comparisons with other Middle-Late Pleistocene *Homo* cranial fossils. Linear measurements in millimetres, angles in degrees, ratios ranged from 0 to 100.

| Measurements                           | Harbin | Dali  | Jinniushan | Maba  | Xuchang | Narmada | Broken Hill | Irhoud 1 |
|----------------------------------------|--------|-------|------------|-------|---------|---------|-------------|----------|
| M1. GOL. g-op. Maximum cranial length  | 221.3  | 212.2 | 203.6      | 196.5 | 217     | 207.5   | 206.3       | 198.9    |
| M1d. NOL. n-op. Nasio-occipital length | 212.9  | 202.2 | 195.4      | 188.5 | 212     | 198.5   | 197.6       | 192.6    |
| M2. Glabella-inion length              | 218.3  | 203.5 | 191.6      | ?     | 217     | 204     | 208         | 198.9    |
| Glabella-sphenobasion length           | 107.6  | 96    | 87.9       | ?     | ?       | ?       | 97.9        | ?        |
| Glabella-bregma chord                  | 122.2  | 114.4 | 112.4      | 104.1 | 103     | 109.8   | 118.2       | 104.4    |
| g-b/g-op. Glabella-bregma chord index  | 55.2   | 53.9  | 55.2       | 53    | 47.45   | 52.9    | 57.3        | 52.5     |



|                                                                          |       |       |       |       |        |       |       |       |
|--------------------------------------------------------------------------|-------|-------|-------|-------|--------|-------|-------|-------|
| Length of basal temporal                                                 | 116.1 | 97    | 104   | ?     | 112    | ?     | 101.8 | ?     |
| BTL/g-op. Basal temporal length index                                    | 52.5  | 45.7  | 51.1  | ?     | 51.65  | ?     | 49.3  | ?     |
| Entire temporal bone length                                              | 104.8 | 97.5  | 97.8  | ?     | 103.8  | 89.6  | 97.6  | 102   |
| ETL/g-op. Entire temporal bone length index                              | 47.4  | 45.9  | 48    | ?     | 47.85  | 43.2  | 47.3  | 51.3  |
| M5. BNL. Basion-nasion length                                            | 117.5 | 108.2 | 97.9  | ?     | ?      | 108.5 | 109.8 | ?     |
| M5(1). Nasion-opisthion length                                           | 152.2 | 147.4 | 147.7 | ?     | ?      | 147.5 | 148.5 | ?     |
| M6. ba-sphba. Basilar length                                             | 23.7  | 25.7  | 22.6  | ?     | ?      | ?     | 24.6  | ?     |
| M7. FOL. Foramen magnum length (ba-o)                                    | 38    | 41.1  | 52.6  | ?     | ?      | ?     | 41.4  | ?     |
| M8. XCB. Maximum cranial breadth                                         | 164.1 | 156.4 | 144.1 | ?     | 177    | 166.7 | 146.9 | 151.5 |
| M8c. Squama suture breadth                                               | 154.6 | 139   | 140.9 | ?     | 167    | 158.5 | 142.8 | 141.6 |
| Maximum cranial breadth at supramastoid crest.                           | 164.1 | 156.7 | 144.1 | ?     | 177    | 166.7 | 146.9 | 148.9 |
| Cranial vault                                                            |       |       |       |       |        |       |       |       |
| Maximum biparietal breadth (Rightmire et al., 2006). Cranial vault       | 157.4 | 155.1 | 143.8 | 146   | 170.7  | 158.5 | 144.4 | 148.9 |
| Ratio. Maximum biparietal breadth / maximum bimastoid breadth            | 95.9  | 99    | 99.8  | ?     | 96.4   | 97.9  | 98.3  | 100.4 |
| M9. ft-ft. Least frontal breadth. Frontal                                | 116.1 | 105.7 | 109   | 98.1  | 122.8  | 107.8 | 97.6  | 108.5 |
| Postorbital constriction index. M9/M44                                   | 88.7  | 90.4  | 88.8  | 91.3  | ?      | 93.3  | 78.1  | 94.9  |
| M10. XFB. Maximum frontal breadth. Frontal                               | 128.1 | 122.7 | 127.1 | 116.6 | 138.8  | 120.8 | 118.3 | 135.1 |
| M10b. STB. Bistephanic breadth (st-st)                                   | 121.9 | 110   | 115.3 | 112.7 | 138.8  | 107.6 | 111.2 | 120.6 |
| M11. AUB. Biauricular breadth                                            | 159.1 | 145.8 | 139.2 | ?     | 173.62 | 151.9 | 135.9 | 143.1 |
| M11b. Biradicular breadth                                                | 158.8 | 144.3 | 132.8 | ?     | 165.1  | 146   | 133.7 | 143   |
| M12. ASB. Biastorian breadth (ast-ast). Temporal                         | 134.4 | 121.4 | 126.4 | ?     | 136.7  | 147.5 | 120.4 | 123.2 |
| M14. WCB. Minimum cranial breadth                                        | 76.7  | 80.6  | 80.9  | ?     | ?      | 77.3  | 72    | 87.6  |
| M16. Foramen magnum breadth                                              | 30.6  | 31.5  | 35.4  | ?     | ?      | ?     | 34.1  | ?     |
| M17. BBH. Basion-Bregma height                                           | 132.6 | 116.4 | 110.7 | ?     | ?      | 129   | 128.8 | ?     |
| M13a. MDB. Mastoid width. Temporal                                       | 21.3  | 18.4  | 17.65 | ?     | 13.9   | 11.8  | 16.1  | 13.3  |
| Maximum mastoid width                                                    | 25.4  | 24.65 | 20.9  | ?     | 20.95  | 18.8  | 20.7  | 20.2  |
| M19a. MDH. Mastoid height. Temporal                                      | 30.65 | 26.55 | 20.5  | ?     | 19.15  | 25.9  | 30.9  | 28.3  |
| Minimum distance between the mastoid and supramastoid crests             | 14.25 | 15.2  | 14.8  | ?     | 14.1   | 17.1  | 8.5   | 11.8  |
| Maximum bimastoid breadth                                                | 147.5 | 140.6 | 128   | ?     | 166.1  | 161.9 | 143.3 | 148.3 |
| M20. Porion-bregmatic project height                                     | 113.9 | 102.9 | 99.7  | ?     | 114.6  | 118.2 | 107.1 | 112.4 |
| AVH. Auriculare-vertex projective height                                 | 109.5 | 101.6 | 97.1  | ?     | 103.9  | 112.8 | 103.3 | 110.6 |
| Biporion breadth. Cranial vault                                          | 147.9 | 135.3 | 128.7 | ?     | 158.5  | 143   | 125.5 | 133.5 |
| Porion-basion height                                                     | 18.8  | 13.6  | 12.9  | ?     | ?      | 13.1  | 22.1  | ?     |
| M29. FRC. n-b. Frontal sagittal chord                                    | 125.1 | 114.9 | 113.5 | 107.9 | 104.9  | 114.9 | 120   | 107.7 |
| FRF. Nasion-subtense fraction. Frontal                                   | 58.6  | 47.7  | 57.3  | 53.6  | 51.8   | 54.8  | 59.7  | 39.7  |
| FRF/M29. Nasion-subtense fraction relative to the frontal sagittal chord | 46.8  | 41.5  | 50.5  | 49.7  | 49.4   | 47.9  | 49.8  | 36.9  |
| Metopion subtense. Frontal                                               | 25.3  | 25.4  | 21.4  | 22.6  | 20.8   | 21    | 21.6  | 22.1  |

|                                                                                                                  |       |       |       |       |       |       |       |       |
|------------------------------------------------------------------------------------------------------------------|-------|-------|-------|-------|-------|-------|-------|-------|
| Metopion subtense/M29. Metopion subtense relative to the nation-bregma chord                                     | 20.2  | 22.1  | 18.9  | 20.9  | 19.8  | 18.3  | 18    | 20.5  |
| Lower frontal inclination angle (m-g-i)                                                                          | 64    | 68.3  | 59.8  | 69    | 64.5  | 68.4  | 60.5  | 73.1  |
| M30. PAC. Parietal sagittal chord                                                                                | 106.1 | 109.3 | 104.7 | 112.1 | 109.2 | 128.3 | 110.8 | 122.7 |
| M30(2). Bregma-sphenion chord (b-sphn)                                                                           | 93.9  | 91.4  | 95.7  | 89    | 100.5 | 96.15 | 89.5  | 96.2  |
| M30(3). Lambda-asterion chord (l-ast)                                                                            | 105.8 | 91.8  | 79.9  | ?     | 99.3  | 99.9  | 90    | 91.6  |
| ASI. Asterion-inion chord                                                                                        | 81.7  | 76    | 72.6  | ?     | 80.4  | 88.3  | 75.2  | 76.8  |
| M30c. Bregma-asterion chord (b-ast). Parietal                                                                    | 146   | 131.9 | 121.7 | ?     | 146.4 | 148.3 | 139.3 | 144.3 |
| Parietal chord index. M30/M1                                                                                     | 47.9  | 51.5  | 51.4  | 57.05 | 50.35 | 61.8  | 53.7  | 61.7  |
| M31. OCC. I-o. Occipital sagittal chord                                                                          | 103.1 | 90.3  | 72.7  | ?     | ?     | 87.8  | 91.1  | ?     |
| M31(1). LIC. Lambda-inion chord (l-i)                                                                            | 79.8  | 69.2  | 53.2  | 52    | 84.2  | 56.1  | 55.7  | 47.3  |
| Lambda-opisthocranion chord                                                                                      | 56.7  | 49.5  | 39.6  | 52    | 82.3  | 44.2  | 43.4  | 47.3  |
| M31(2). Inion-opisthion chord (i-o)                                                                              | 62.2  | 39    | 39.2  | ?     | ?     | 53.8  | 63.6  | ?     |
| Ratio. M31(1)/M31(2). Length of occipital (lambda-inion) plane compared to nuchal (inion- opisthion) plane. X100 | 128.3 | 177.4 | 135.7 | ?     | ?     | 104.3 | 87.6  | ?     |
| Opisthocranion-opisthion chord                                                                                   | 77.9  | 64.5  | 58.4  | ?     | ?     | 65.2  | 67.7  | ?     |
| Sphenobasion-opisthion length                                                                                    | 58.2  | 63.9  | 70.6  | ?     | ?     | ?     | 63.6  | ?     |
| M32(1). Frontal inclination angle (b-n-i). Frontal                                                               | 50.9  | 51.8  | 48.6  | 51.5  | 51.4  | 58.6  | 49.4  | 52.9  |
| M32(2). Bregma angle (b-g-i). Frontal                                                                            | 46.9  | 47.2  | 45    | 48.5  | 47.2  | 54    | 45.9  | 49.7  |
| M32(5). FRA. Frontal angle (b-m-n, degree)                                                                       | 135.9 | 129.7 | 138.7 | 134.7 | 137.3 | 139.9 | 141.1 | 132.7 |
| M33d. OCA. Occipital angle (degree)                                                                              | 93.4  | 94.2  | 95.6  | ?     | ?     | 105.6 | 102.2 | ?     |
| M33e. PAA. Parietal angle (degree)                                                                               | 146.5 | 145.8 | 142   | 139.2 | 152.7 | 140   | 145.8 | 150.3 |
| M33(4). Lambda-inion-opisthion angle (l-i-o)                                                                     | 93.3  | 98.4  | 102.8 | ?     | ?     | 106.9 | 100.5 | ?     |
| Temporal squama length (Martínez and Arsuaga, 1997)                                                              | 71.4  | 70.9  | 68.5  | ?     | 70.8  | 69.9  | 69.3  | 79.3  |
| Temporal squama height (Martínez and Arsuaga, 1997)                                                              | 52.9  | 46.5  | 41.2  | ?     | 39.8  | 52    | 51.7  | 38.3  |
| Temporal squama angle (Martínez and Arsuaga, 1997)                                                               | 52.8  | 46.8  | 50.2  | ?     | 38.7  | 56.8  | 52    | 32    |
| Temporal muscle attachment height                                                                                | 83.3  | 89.9  | 87.6  | ?     | 76.1  | 90    | 91.4  | 75.8  |
| Temporal muscle attachment length                                                                                | 143.4 | 131.4 | 141.9 | 140   | 140   | 127.2 | 143.7 | 135.2 |
| Temporal muscle attachment length index                                                                          | 64.8  | 61.9  | 69.7  | 71.25 | 64.55 | 61.3  | 69.7  | 68    |
| Transverse tympanic width                                                                                        | 22.5  | 25.6  | 20.7  | ?     | ?     | 25.5  | 26    | ?     |
| Tympanic axis angle                                                                                              | 94.8  | 101.2 | 100.4 | ?     | ?     | 91.6  | 105.8 | ?     |
| Tympanic axis length                                                                                             | 23.1  | 23.2  | 21.4  | ?     | ?     | 23    | 26.5  | ?     |
| Petrous axis angle                                                                                               | 128.4 | 136.9 | 131.7 | ?     | ?     | 124   | 122   | ?     |
| Petrous axis length                                                                                              | 14.5  | 12.9  | 13    | ?     | ?     | 15.9  | 11.6  | ?     |
| Tympanic angle                                                                                                   | 38.6  | 34.9  | 30.4  | ?     | ?     | 31.2  | 16.8  | ?     |
| Postglenoid-ectoglenoid length                                                                                   | 17.4  | 18.3  | 14.5  | ?     | 19.4  | 14.5  | 18.1  | 24.2  |
| Postglenoid-entoglenoid length                                                                                   | 24.8  | 21.3  | 15.4  | ?     | ?     | 24.2  | 23.8  | 17.8  |

|                                                                           |       |       |       |       |       |       |       |       |
|---------------------------------------------------------------------------|-------|-------|-------|-------|-------|-------|-------|-------|
| Ectoglenoid-entoglenoid length                                            | 29.9  | 29.5  | 23.4  | ?     | ?     | 25    | 30.2  | 30.2  |
| Chord length of the parietomastoid suture. Incisura parietalis - asterion | 33.4  | 26.7  | 29.3  | ?     | 33    | 19.7  | 28.3  | 22.7  |
| Occipital height (l-sphba)                                                | 130.7 | 123.8 | 117   | ?     | ?     | ?     | 125.3 | ?     |
| Occipital subtense                                                        | 47.7  | 41.7  | 33.8  | ?     | ?     | 31.8  | 37.1  | ?     |
| Occipital plane index                                                     | 42.2  | 40.8  | 31.3  | ?     | 60.2  | 38    | 36    | 38.4  |
| Inion-endinion                                                            | 25.1  | 26.4  | ?     | ?     | ?     | ?     | 35.3  | 37.9  |
| M40. BPL. Basion-prosthion length. Cranial vault                          | 125.1 | 107.8 | 101.6 | ?     | ?     | ?     | 117.1 | ?     |
| M43. FMT. Bi-frontomale temporale breadth (fmt-fmt). Frontal              | 140.2 | 124.4 | 129   | 117.2 | 140   | 123.8 | 134.4 | 127.2 |
| M43a. FMB. Bifrontal breadth. Frontal                                     | 130.9 | 116.9 | 122.7 | 107.4 | 120   | 113.9 | 124.9 | 113   |
| M43b. NAS. Nasio-frontal subtense                                         | 27.1  | 20.4  | 21.4  | 18.8  | 13.1  | 13.8  | 26.4  | 19    |
| M43b/M43a. Nasion-frontal subtense relative to the bifrontal breadth      | 20.7  | 17.5  | 17.4  | 17.5  | 10.9  | 12.1  | 21.1  | 16.8  |
| Frontal. Supraorbital torus breadth                                       | 145.7 | 129   | 135.5 | 119   | 140.7 | 125.5 | 139.4 | 128.3 |
| M44. EKB. Biorbital breadth (ek-ek)                                       | 130.9 | 116.9 | 122.7 | 107.4 | ?     | 115.6 | 124.9 | 114.3 |
| Supraorbital torus thickness central. Frontal                             | 15    | 18    | 10.8  | 12.4  | 13.8  | 14    | 20    | 13.1  |
| Supraorbital torus thickness lateral. Frontal                             | 15.5  | 13    | 13.4  | 9.5   | 12.7  | 18.2  | 17.2  | 17.2  |
| Supraorbital torus thickness medial. Frontal                              | 21.4  | 19.2  | 15.8  | 16.8  | ?     | 13.5  | 20    | 18.8  |
| M45. ZYB. Bizygomatic breadth (zy-zy)                                     | 162.4 | 143.8 | 148.5 | ?     | ?     | ?     | 143.4 | ?     |
| M45(1). JUB. Bijugal breadth                                              | 138.6 | 126.5 | 130.9 | 114.2 | ?     | 122.4 | 134.1 | 127.9 |
| M46b. ZMB. Bimaxillary breadth                                            | 113.8 | 111.4 | 116.9 | ?     | ?     | ?     | 110.6 | 108.1 |
| Facial proportion. M46b/M43                                               | 81.2  | 89.5  | 90.6  | ?     | ?     | ?     | 82.3  | 85    |
| Temporal gutter angle                                                     | 54.8  | 59.4  | 58.5  | 48.2  | ?     | 49.5  | 51    | 40.4  |
| M48. NPH. Upper facial height. Nasion-prosthion height (n-pr)             | 76.4  | 64.1  | 72.5  | ?     | ?     | ?     | 90.9  | 83.5  |
| M48(1). Nasospinale-prosthion distance (ns-pr)                            | 16.2  | 16.8  | 19.7  | ?     | ?     | ?     | 26.9  | 23    |
| M74. Upper facial angle. Nasion-prosthion relative to the FH              | 78    | 82.1  | 82.9  | ?     | ?     | ?     | 82.2  | 75.9  |
| M74(1). Clivus-alveolar plane angle                                       | 57.9  | 55.1  | 74.1  | ?     | ?     | ?     | 65    | 64.8  |
| Nasospinale-alveolare length                                              | 19.5  | ?     | 23    | ?     | ?     | ?     | 31.5  | ?     |
| Nasospinale-alveolare angle                                               | 81.5  | ?     | 86.7  | ?     | ?     | ?     | 84.9  | ?     |
| M48d. WMH. Cheek height                                                   | 28.3  | 22.6  | 27.6  | ?     | ?     | ?     | 26.5  | 23.45 |
| M49a. DKB. Interorbital breadth (d-d)                                     | 24.7  | 20.6  | 26.2  | 19.9  | ?     | ?     | 25.3  | 27.3  |
| M50. IOW. Anterior interorbital breadth (mf-mf)                           | 31.4  | 23.5  | 33.6  | 22.4  | ?     | ?     | 28.1  | 26.6  |
| M51. Orbital breadth (mf-ek)                                              | 52.4  | 50.5  | 46.4  | 47    | ?     | 51.5  | 52.7  | 45.1  |
| M51a. OBB. Orbital breadth                                                | 57.3  | 51    | 50.7  | 45.5  | ?     | 51    | 49.5  | 44.9  |
| M52. OBH. Orbital height                                                  | 41.6  | 34.2  | 36    | 38    | ?     | 39    | 39.2  | 33.3  |
| M54. NBL. Nasal breadth                                                   | 36.2  | 34.9  | 31.8  | ?     | ?     | ?     | 31.5  | 36    |
| M57(2). Upper nasal breadth of nasal bones                                | 17.9  | 8.5   | 13    | 13.4  | ?     | ?     | 17.7  | 15.9  |
| M55. NH. Nasal height                                                     | 61    | 48.4  | 52.1  | ?     | ?     | ?     | 63.9  | 56.5  |

|                                                                                                                                                                                                          |       |       |       |      |   |       |       |       |
|----------------------------------------------------------------------------------------------------------------------------------------------------------------------------------------------------------|-------|-------|-------|------|---|-------|-------|-------|
| M61. MAB. Maxilloalveolar breadth                                                                                                                                                                        | 79.2  | 73.9  | 65.5  | ?    | ? | ?     | 84.8  | 73.5  |
| Maxilloalveolar length                                                                                                                                                                                   | 74    | 69.1  | 65.1  | ?    | ? | ?     | 67.2  | 63.1  |
| Maxillary palate length                                                                                                                                                                                  | 45.8  | 49.8  | 39.5  | ?    | ? | ?     | 42.4  | 45    |
| M63. Internal palatal breadth                                                                                                                                                                            | 39    | 40.3  | 34.8  | ?    | ? | ?     | 47.4  | 40.6  |
| External alveolar breadth at canine level                                                                                                                                                                | 68.8  | 51.3  | 46.4  | ?    | ? | ?     | 52.4  | 50.8  |
| External alveolar breadth at P3 level                                                                                                                                                                    | 73.1  | 62    | 54.7  | ?    | ? | ?     | 62.1  | 56.6  |
| External alveolar breadth at P4 level                                                                                                                                                                    | 74.6  | 66.2  | 60.5  | ?    | ? | ?     | 67.7  | 65.1  |
| External alveolar breadth at M1/M2 level                                                                                                                                                                 | 74.5  | 67.2  | 64.8  | ?    | ? | ?     | 78.7  | 73.5  |
| M61 relative to the external palatal breadth at the canine level                                                                                                                                         | 115.1 | 144.1 | 141.2 | ?    | ? | ?     | 161.8 | 144.7 |
| M61 relative to the external palatal breadth at the P3 level                                                                                                                                             | 108.3 | 119.2 | 119.7 | ?    | ? | ?     | 129.1 | 129.9 |
| M76a. SSA. Zygomaxillary angle (degree)                                                                                                                                                                  | 112.3 | 122.6 | 119.5 | ?    | ? | ?     | 107.3 | 116.8 |
| Subspinale subtense                                                                                                                                                                                      | 38.2  | 30.5  | 33.9  | ?    | ? | ?     | 40.8  | 33.5  |
| M77a. NFA. Nasio-frontal angle (fm:a-n-fm:a)                                                                                                                                                             | 135.2 | 141.8 | 142.7 | 143  | ? | 152.9 | 136   | 145.3 |
| Width of nasal bridge. Rightmire 1998                                                                                                                                                                    | 29.9  | 24.7  | 31    | 20.1 | ? | ?     | 27.4  | 27.8  |
| Nasal bridge height. Rightmire 1998                                                                                                                                                                      | 16.2  | 12.1  | 11.6  | 12.4 | ? | ?     | 16.8  | 20.5  |
| Nasal bridge index. Rightmire 1998                                                                                                                                                                       | 54.2  | 49    | 37.4  | 61.7 | ? | ?     | 61.3  | 73.7  |
| Nasal bridge angle. Rightmire 1998                                                                                                                                                                       | 85.8  | 91.4  | 103.4 | 75.7 | ? | ?     | 77.3  | 67.4  |
| M41c. XML. Maximum malar length                                                                                                                                                                          | 52.7  | 54    | 52    | ?    | ? | ?     | 56.6  | ?     |
| Maximum malar height (Rightmire et al., 2006)                                                                                                                                                            | 52.1  | 43.1  | 41.6  | ?    | ? | ?     | 54.1  | 48.7  |
| Zygomaxillare anterior-zygoorbitale (zm:a-zo)                                                                                                                                                            | 33.9  | 32.9  | 35.4  | ?    | ? | ?     | 33.4  | 32.9  |
| M41d. MLS. Malar subtense                                                                                                                                                                                | 11.5  | 10.8  | 10.4  | ?    | ? | ?     | 12.3  | ?     |
| IZM height. Inferior zygomatic margin height                                                                                                                                                             | 18.9  | 16.9  | 21.2  | ?    | ? | ?     | 26.5  | 22.9  |
| Malar angle. Posterior-inferior angle between the Frankfurt horizontal and the chord connecting the most inferior-lateral point of the orbit and the most inferior point on the malaria-maxillary suture | 67.9  | 50.3  | 58.8  | ?    | ? | ?     | 73.8  | 66.7  |
| bimandibular fossa breadth                                                                                                                                                                               | 116.2 | 104.7 | 97.7  | ?    | ? | 118.7 | 107.8 | 113.6 |
| Mandibular fossa depth                                                                                                                                                                                   | 11.8  | 6.5   | 9.3   | ?    | 8 | 9.2   | 10.1  | ?     |
| Midfacial prognathism                                                                                                                                                                                    | 15.8  | 5.6   | 9.1   | ?    | ? | ?     | 12.3  | 16.7  |
| Dental. Upper M2. Mesiodistal length                                                                                                                                                                     | 13.6  | ?     | 11.1  | ?    | ? | ?     | 12.4  | ?     |
| Dental. Upper M2. Buccolingual width                                                                                                                                                                     | 16.6  | ?     | 12.3  | ?    | ? | ?     | 13.4  | ?     |
| Dental. Upper M2. Width/length                                                                                                                                                                           | 122.1 | ?     | 110.8 | ?    | ? | ?     | 108.1 | ?     |

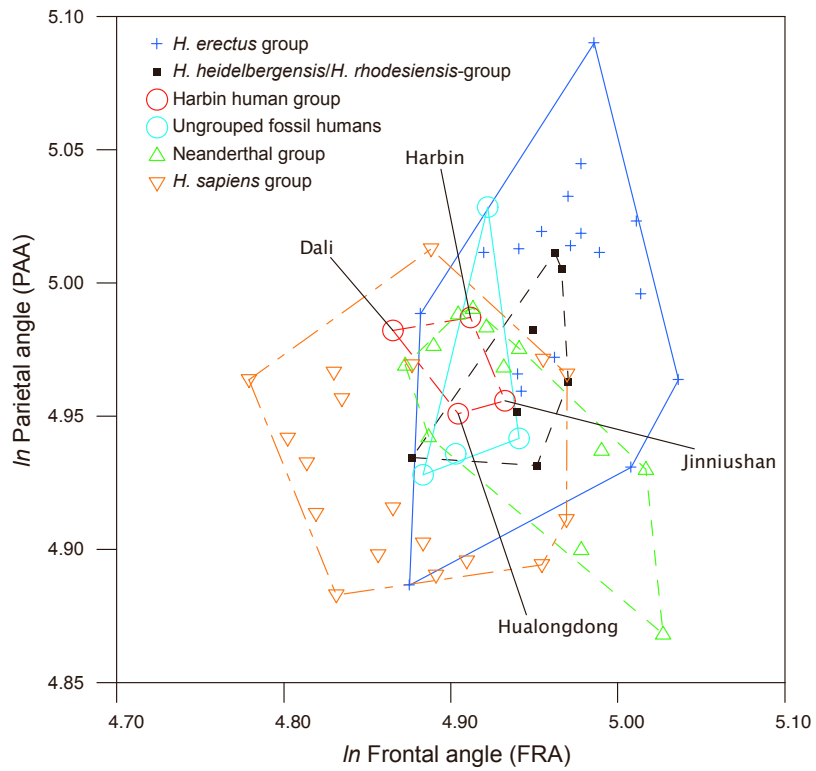

S-Figure 2. Frontal angle and parietal angle of the Harbin cranium compared with other Middle-Late Pleistocene *Homo* cranial fossils. Scales in *ln*-degrees. The *Homo erectus* group tends to have flat frontal and parietal bones (with larger frontal angles and parietal angles). The *Homo sapiens* group tends to have more arched frontal and parietal bones (with smaller frontal angles and parietal angles). Harbin and comparable Chinese fossils lie centrally in this figure.



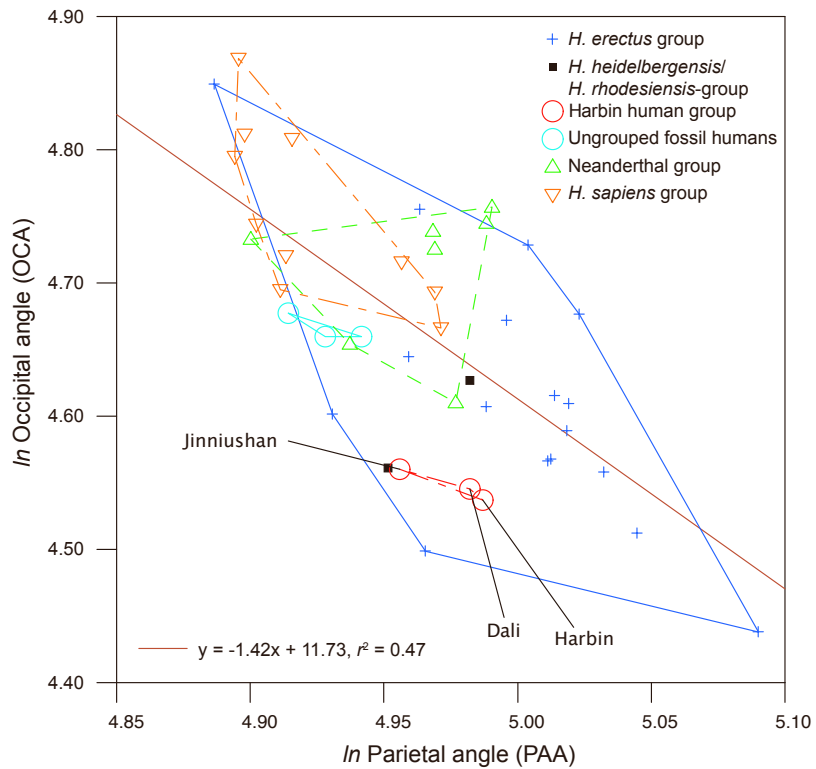

S-Figure 3. Parietal angle and occipital angle of the Harbin cranium compared with other Middle-Late Pleistocene *Homo* cranial fossils. Scales in *ln*-degrees. The *Homo erectus* group tends to have flat parietal bones (with larger parietal angles) and more angulated occipital bones (with smaller occipital angles). The *Homo sapiens* group tends to have more arched parietal bones (with smaller parietal angles) and flat occipital bones (with larger occipital angles). The Harbin, Dali, and Jinniushan crania fall in the range of the *Homo erectus* group.

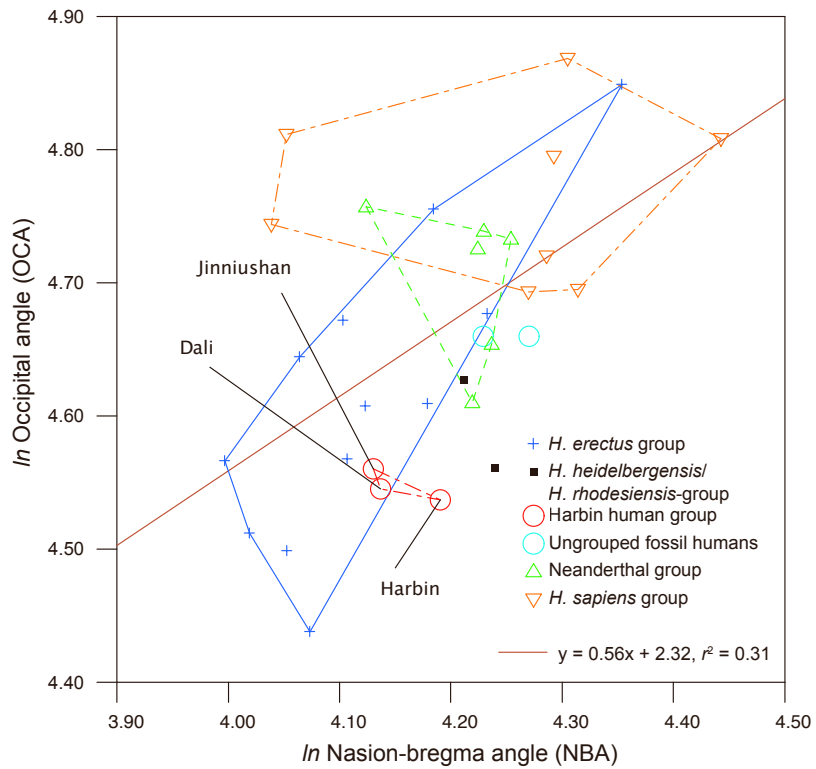

S-Figure 4. Nasion-bregma angle and occipital angle of the Harbin cranium compared with other Middle-Late Pleistocene *Homo* cranial fossils. Scales in *ln*-degrees. The *Homo erectus* group tends to have smaller nasion-bregma angles and more arched occipital bones (with smaller occipital angles) than *Homo sapiens*. The *H. sapiens* group tends to have less angulated occipital bones (with larger occipital angles) and larger nasion-bregma angles. The Harbin, Dali, and Jinniushan crania fall in the range of the *H. erectus* group.

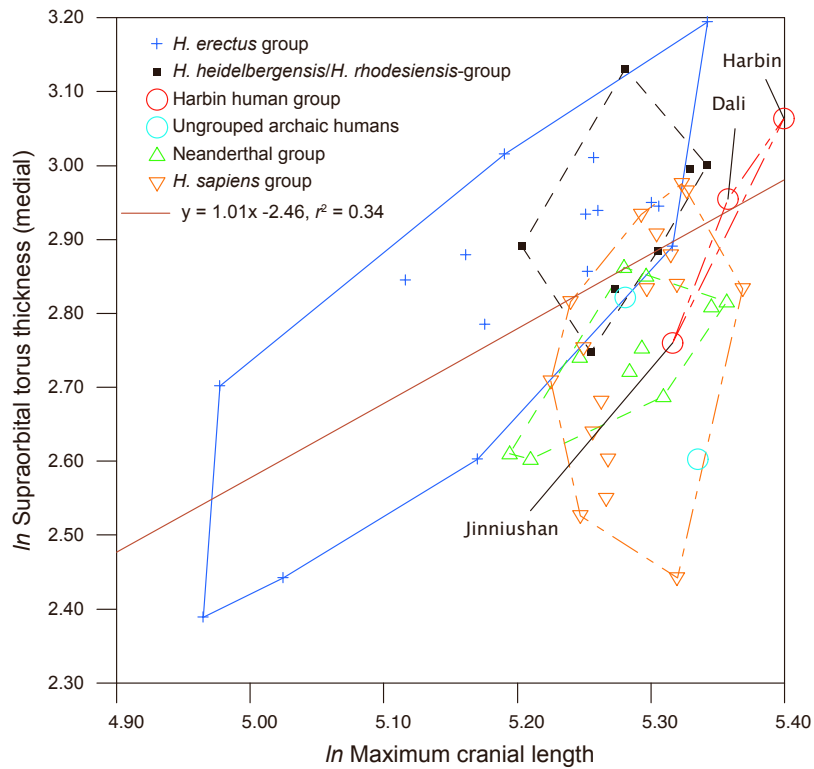

S-Figure 5. Medial supraorbital torus thickness of the Harbin cranium compared with other Middle-Late Pleistocene *Homo* cranial fossils. Scales in *ln*-millimeters. The regression line fits on the data excluding *Homo sapiens*. The linear relationship between the maximum cranial length and the medial supraorbital torus thickness fits quite well within the archaic humans and excluding *H. sapiens*. The medial supraorbital torus thickness of *H. sapiens* is not correlated with the maximum cranial length, which can be used as a proxy of body size. The Harbin, Dali, and Jinniushan crania fall in the range of archaic humans, excluding *H. sapiens*, but have a small overlap with *H. sapiens*.

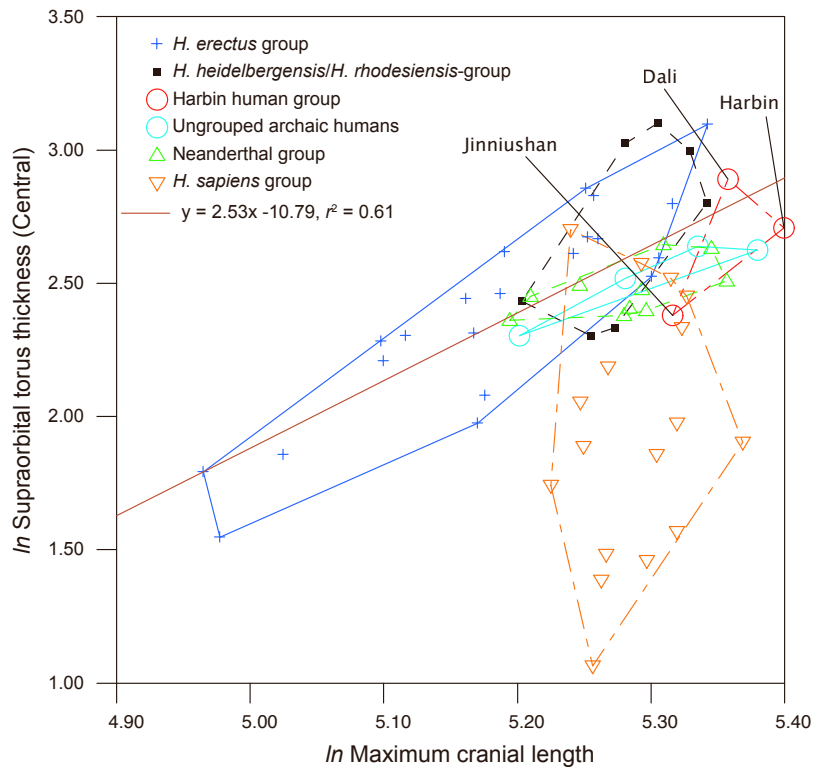

S-Figure 6. Central supraorbital torus thickness of the Harbin cranium compared with other Middle-Late Pleistocene *Homo* cranial fossils. Scales in *ln*-millimeters. The regression line fits on the data excluding *Homo sapiens*. The linear relationship between the maximum cranial length and the central supraorbital torus thickness fits quite well within the archaic humans, excluding *H. sapiens*. The central supraorbital torus thickness of *H. sapiens* is not correlated with the maximum cranial length, which can be used as a proxy of body size. The Harbin, Dali, and Jinniushan crania fall in the range of archaic humans, excluding *H. sapiens*, but have a small overlap with *H. sapiens*.

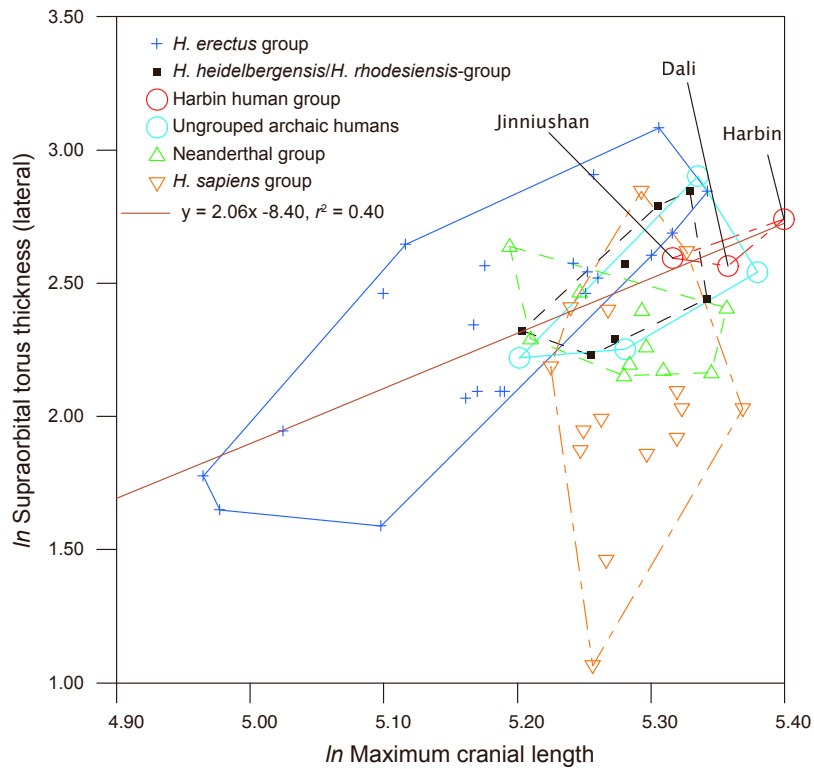

S-Figure 7. Lateral supraorbital torus thickness of the Harbin cranium compared with other Middle-Late Pleistocene *Homo* cranial fossils. Scales in *ln*-millimeters. The regression line fits on the data excluding *Homo sapiens*. The linear relationship between the maximum cranial length and the lateral supraorbital torus thickness fits quite well within the archaic humans, excluding *H. sapiens*. The lateral supraorbital torus thickness of *H. sapiens* is not correlated with the maximum cranial length, which can be used as a proxy of body size. The Harbin, Dali, and Jinniushan crania fall in the range of archaic humans, excluding *H. sapiens*, but have a small overlap with *H. sapiens*.



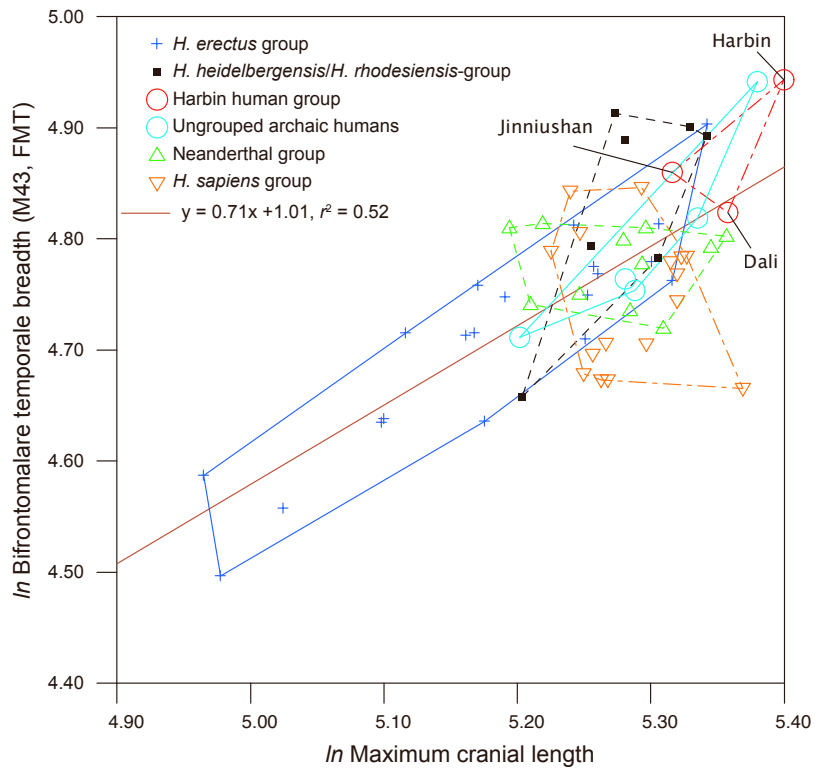

S-Figure 8. Bifrontomolare temporale breadth of the Harbin cranium compared with other Middle-Late Pleistocene *Homo* cranial fossils. Scales in *ln*-millimeters. The regression analysis indicates that all the humans examined here follow the same linear relationship between the bifrontomolare temporale breadth and the maximum cranial length.

The Harbin cranium is well above the regression line, suggesting that it has a broader face relative to its cranial length.

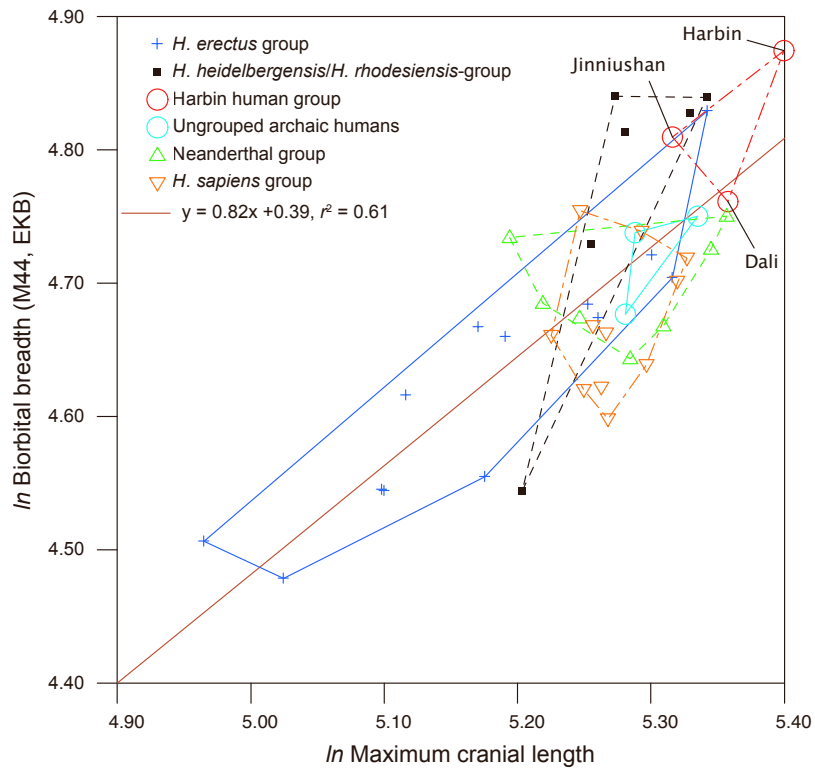

S-Figure 9. Biorbital breadth of the Harbin cranium compared with other Middle-Late Pleistocene *Homo* cranial fossils. Scales in *ln*-millimeters. The regression analysis indicates that all the humans examined here follow the same linear relationship between the biorbital breadth and the maximum cranial length. The Harbin cranium lies well above the regression line, suggesting that it has a broader face relative to its cranial length.

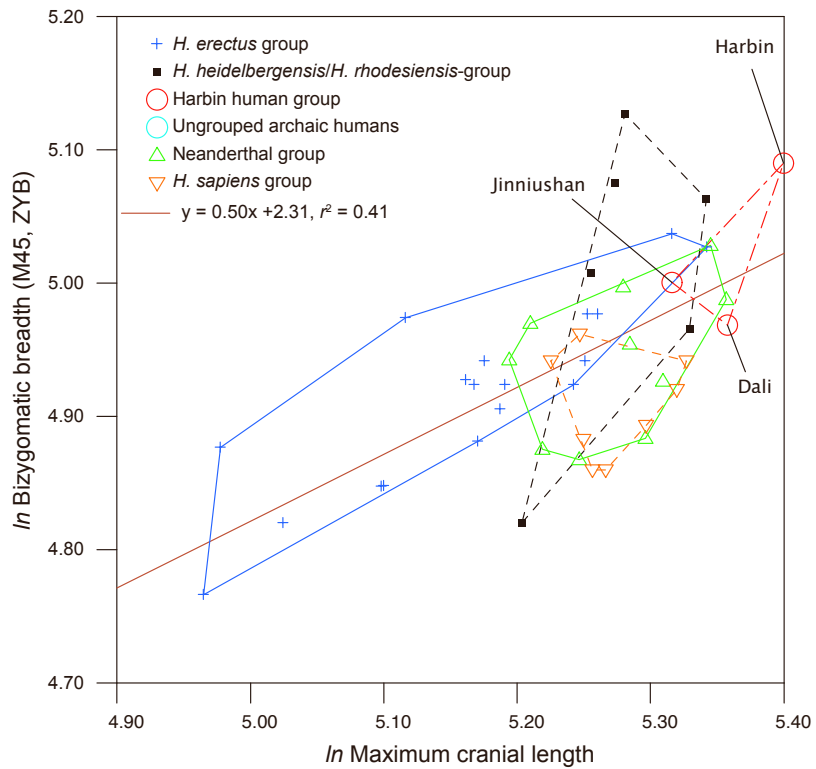

S-Figure 10. Bizygomatic breadth of the Harbin cranium compared with other Middle-Late Pleistocene *Homo* cranial fossils. Scales in *ln*-millimeters. The regression analysis indicates that all the humans examined here follow the same linear relationship between the bizygomatic breadth and the maximum cranial length. The Harbin cranium lies well above the regression line, suggesting that it has a broader face relative to its cranial length.

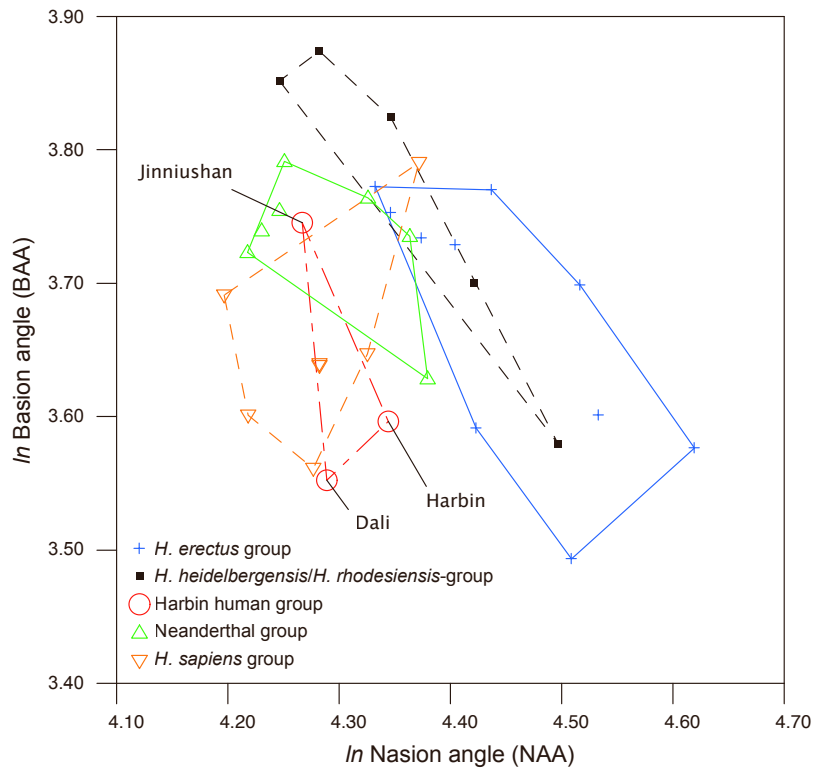

S-Figure 11. The basion angle and nasion angle of the Harbin cranium compared with other Middle-Late Pleistocene *Homo* cranial fossils. Scales in *ln*-degrees. The two angles do not show a significant linear relationship when all the data are grouped together. *Homo sapiens* tend to have smaller nasion and basion angles, corresponding to a low and retracted face. The Harbin, Dali and Jinniushan crania largely overlap the range of *H. sapiens*.

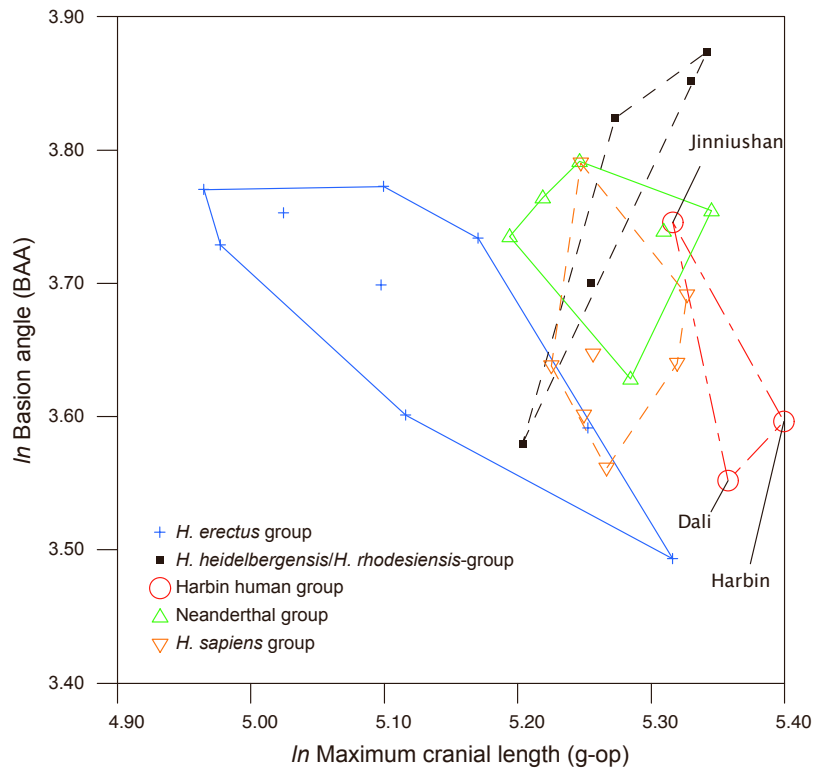

S-Figure 12. The basion angles of the Harbin cranium and other Middle-Late Pleistocene *Homo* cranial fossils relative to the maximum cranial lengths. Scales in *ln*-degrees and *ln* millimeters. The basion angles do not show a significant linear relationship against the maximum cranial lengths. *Homo sapiens* tend to have smaller nasion and basion angles, corresponding to their low and retracted faces. The Harbin and Dali also have small basion and nasion angles.

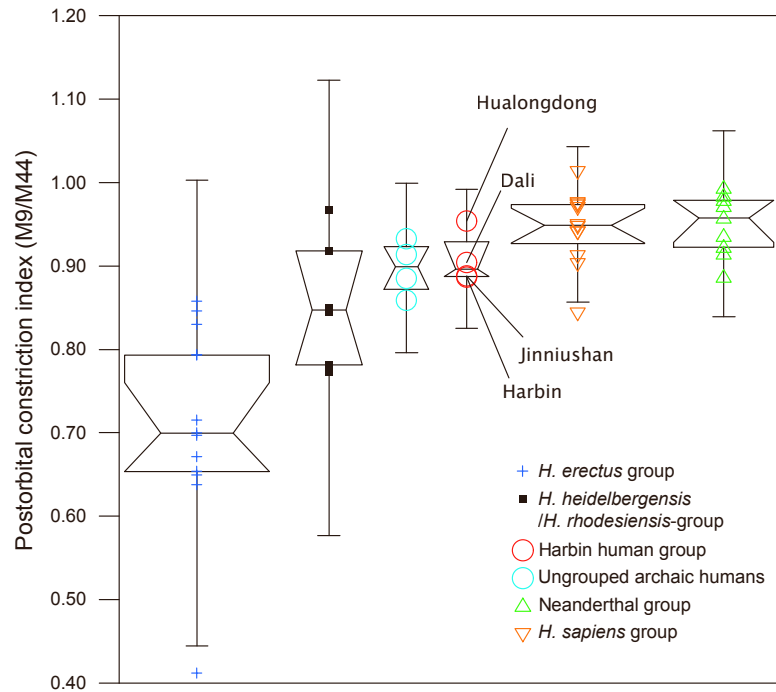

S-Figure 13. Postorbital constriction index of the Harbin cranium compared with other Middle-Late Pleistocene *Homo* cranial fossils. The postorbital constriction index is calculated as the quotient of least frontal breadth (M9) over biorbital breadth (M44). Notched boxes indicate the first quartiles (Q1s) and the third quartiles (Q3s). Whiskers indicate 1.5 times the interquartile range (IQR,  $IQR = Q3 - Q1$ ). The notches indicate the medians. The widths of the boxes are proportional to the sample sizes. The postorbital constriction variation range of *Homo sapiens* largely overlaps that of the Neanderthals. The Harbin cranium has a moderate postorbital constriction, well above the variation range of *Homo erectus*, but below the variation range of *H. sapiens* and the Neanderthals. It overlaps with those of the *Homo heidelbergensis*/*Homo rhodesiensis* group and the ungrouped archaic humans.

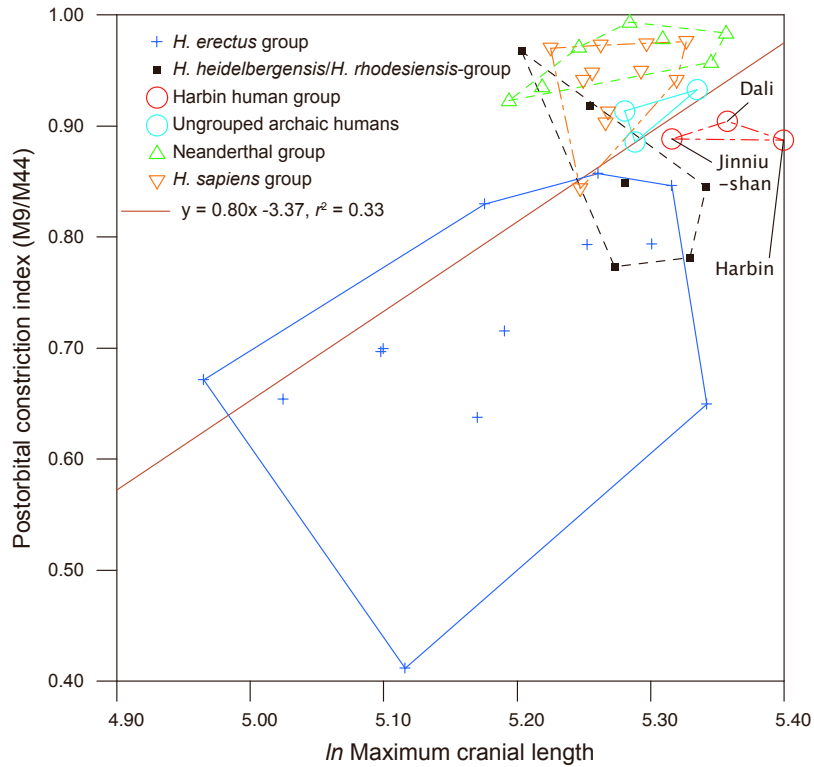

S-Figure 14. Postorbital constriction indices of the Harbin cranium and other Middle-Late Pleistocene *Homo* cranial fossils, relative to the maximum cranium lengths. Maximum cranial length is scaled in  $\ln$  millimeters. Postorbital constriction index is calculated as the quotient of least frontal breadth (M9) over biorbital breadth (M44). Larger cranial lengths tend to have larger postorbital constriction indices. The postorbital constriction variation range of *Homo sapiens* largely overlaps that of the Neanderthals. The Harbin cranium has a relatively lower postorbital constriction index compared with the Neanderthal and *H. sapiens* groups.



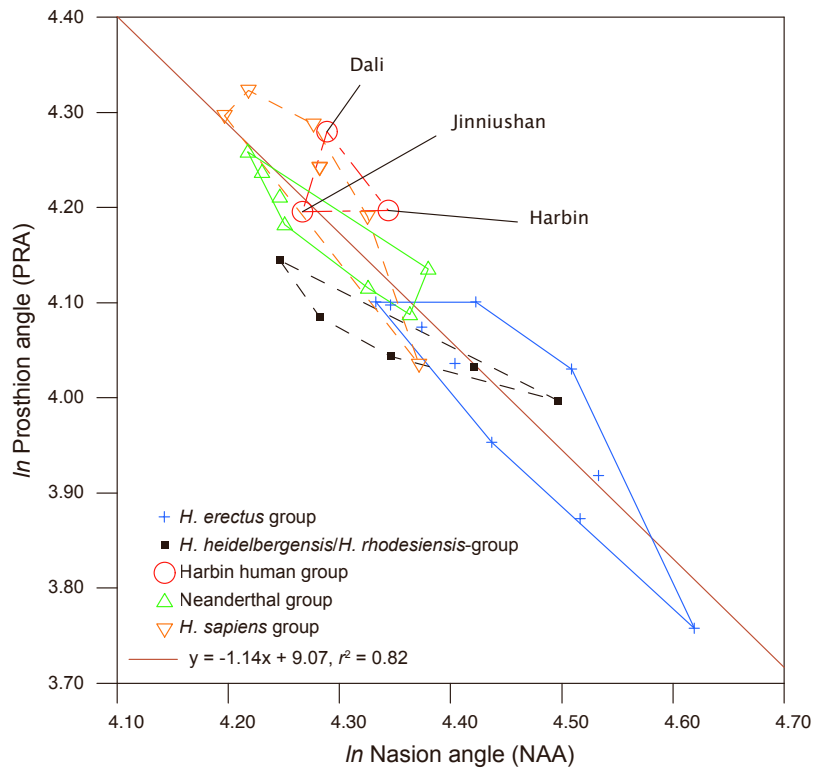

S-Figure 15. The prosthion angle and nasion angle of the Harbin cranium compared with other Middle-Late Pleistocene *Homo* cranial fossils. Scales in *ln*-degrees. The two angles show a significant linear relationship. *Homo sapiens* have smaller nasion angles and larger prosthion angles, corresponding to lower prognathism. *Homo erectus* have larger nasion angles and smaller prosthion angles, corresponding to higher prognathism. The Harbin, Dali and Jinniushan crania fall in the range of *H. sapiens*.

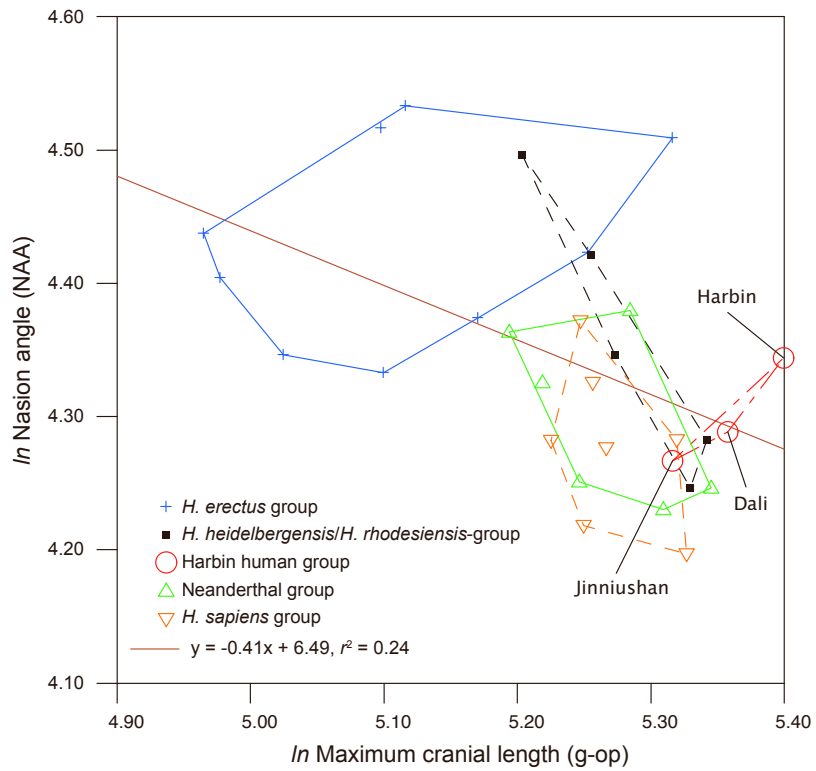

S-Figure 16. The nasion angles of the Harbin cranium and other Middle-Late Pleistocene *Homo* cranial fossils relative to the maximum cranial lengths. Scales in  $\ln$ -degrees and  $\ln$  millimeters. The nasion angles show a weak linear relationship against the maximum cranial lengths. If *Homo erectus* and other humans are considered separately, the linear relationship does not show. *Homo sapiens* and Neanderthals show large overlaps. The Jinniushan and Dali crania are close to the ranges of *H. sapiens* and Neanderthals, while Harbin lies outside the range because of its huge size.

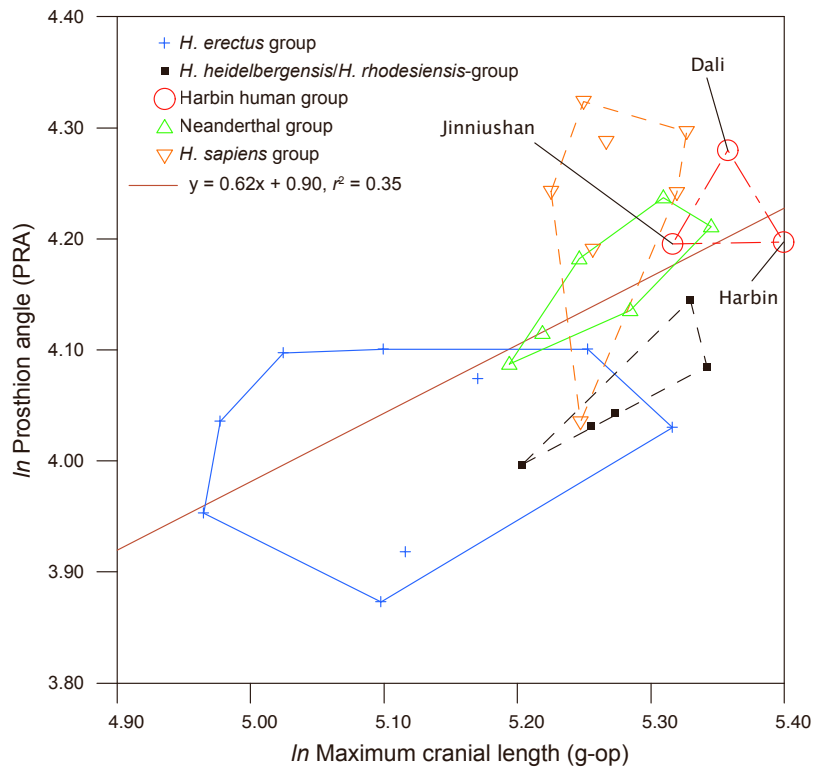

S-Figure 17. The prosthion angles of the Harbin cranium and other Middle-Late Pleistocene *Homo* cranial fossils relative to the maximum cranial lengths. Scales in *ln*-degrees and *ln* millimeters. The prosthion angles show a linear relationship against the maximum cranial lengths. If *Homo erectus* and other humans are considered separately, the linear relationship does not show. *Homo sapiens* and Neanderthals show large overlaps. The Jinniushan and Dali crania are close to the ranges of *H. sapiens* and Neanderthals, while Harbin lies outside the range because of its huge size.

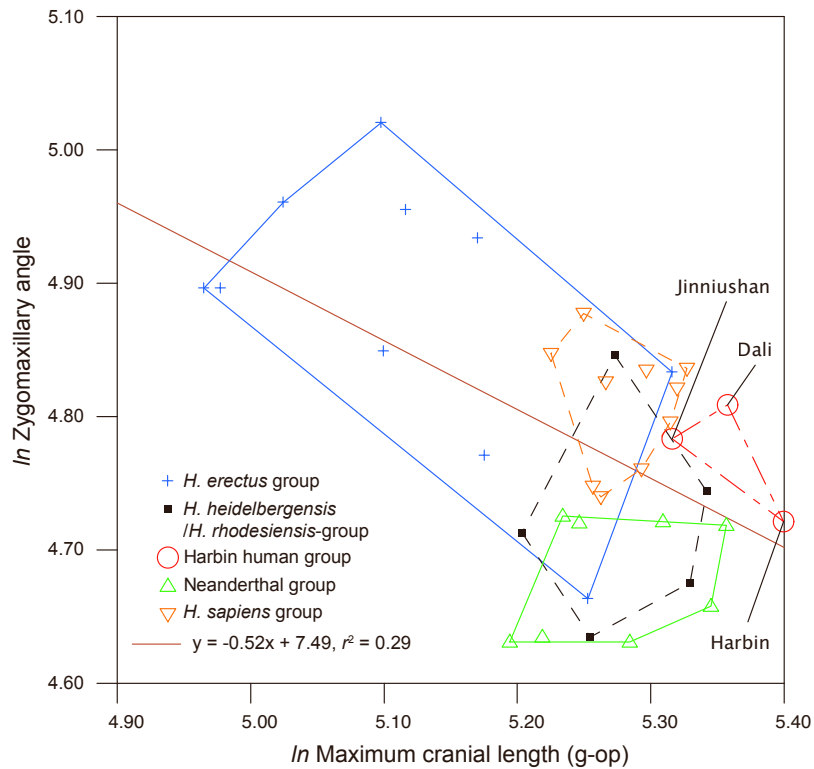

S-Figure 18. The zygomaxillary angles of the Harbin cranium and other Middle-Late Pleistocene *Homo* cranial fossils relative to the maximum cranial lengths. Scales in *ln*-degrees and *ln* millimeters. The zygomaxillary angles show a linear relationship against the maximum cranial lengths. If *Homo erectus* and other humans are considered separately, the linear relationship does not show. Given the same maximum cranial length, *Homo sapiens* have larger zygomaxillary angles than Neanderthals. The Harbin, Jinniushan and Dali crania are closer to the range of *H. sapiens*.

### Characters for phylogenetic analysis

The 234 discrete characters were all equally weighted. Forty-six multi-state characters were set as “ordered”. When the scored specimens were merged into a terminal taxon, their character states were also merged. The merged cells with multiple states were set to polymorphism.

To remove the effect of body size, the linear measurements of the crania and the upper dentitions of a scored specimen were divided by the  $1/3^{\text{rd}}$  power of the cranial capacity of this specimen. The linear measurements of the mandibles and lower dentitions of a scored specimen were divided by the bi-ramus breadth at the alveolar margin of this specimen. Ratios were calculated as one linear measurement over another linear measurement and multiplied by 100. After the removal of the effect of body size, the linear measurement, ratio, or angle variables were normalized. Given a variable, a value of this variable minus the minimum of the variable, then the result was divided by the difference between the maximum and minimum of this variable among all the scored specimens. After transformation and normalization, all the continuous characters have a range between 0 and 1.

In total 400 normalized continuous characters and 234 discrete characters were used for phylogenetic analysis.

The names of the characters were listed in Appendix 1 and Appendix 2.

### Parsimony analysis

Parsimony analysis of the dataset (discrete and continuous, Appendix 3) was undertaken by using TNT, Tree analysis using New Technology, a parsimony analysis program subsidized by the Willi Hennig Society<sup>63</sup>. We used the parallel version of TNT on one hundred CPU cores. We ran multiple replications, using sectorial searches, drifting, ratchet and fusing combined (Appendix 4). Random sectorial search, constraint sectorial search and exclusive sectorial search were set with default settings. On each core, ten cycles of tree drifting, 10 cycles of ratchet and 10 cycles of tree fusing were performed in the search. The search level was set as 10 for 55 taxa. Optimal scores were hit 10 times independently, each hit with 1000 initial replications. In total 1 million replications were performed (10000 replications on each core). Some characters are set as ordered (Appendix 4, 5). All characters have equal weight. No constraint was used for the parsimony analysis. About 31 hours were required to finish the non-constraint parsimony search on our computing cluster. More than 3247 billion rearrangements were examined. Twenty-five trees with a best score of 2812.678 were retained.

To reflect the recent results from palaeoproteomic and ancient DNA researches<sup>28, 64-66</sup>, partial backbone constraints were used to force the Xiahe mandible as the sister group of Neanderthals and to force *H. antecessor* outside of the Neanderthal-Xiahe-*H. sapiens* clade. The same searching strategy was used as in the non-constraint parsimony analysis. Script for the backbone constrained parsimony searches is given in Appendix 5. About 31 hours were required to finish the backbone constrained parsimony search. More than 3207 billion rearrangements were examined. Fifty-five trees with a best score of 2818.897 were retained.

We used Bremer supports<sup>67</sup> calculated in TNT (Appendix 6) to describe the stability of the phylogenetic results (S-Fig. 19, 20). The results of backbone-constrained and non-constraint searches were compared in S-Table 3. The most parsimonious trees (S-Fig. 19) are preferred because they require fewer assumptions than the backbone-constrained trees. The majority consensus of the most parsimonious trees was described in TNT. The synapomorphies were listed in S-Table 4 to S-Table 7 and Appendix 7.

When parsimony criteria are used for mapping the characters on the most parsimonious tree, the Harbin human group (Harbin, Dali, Jinniushan, Hualongdong, Xiahe) shares 31 synapomorphies of continuous characters and 10 synapomorphies of discrete characters (S-Table 4). Most of these continuous characters are related to an increase in overall size and robustness, such as nasion-opisthion length, biasterionic breadth, and supraorbital torus breadth. A few angles, such as the frontal inclination angle, bregma angle, occipital angle etc., are related to the low cranial vaults of the Harbin group. The upper facial angle and nasiospinale-alveolare angle are enlarged, while the nasio-frontal angle and midfacial prognathism are reduced. These four characters are related to the reduction of prognathism in the Harbin human group. The discrete synapomorphic characters mainly lie in the anterior maxillary and temporal regions. Synapomorphies supporting the Harbin-*H. sapiens* clade include 20 continuous characters and 9 discrete characters (S-Table 7). Most of the continuous characters are related to the increase in cranial breadth and reduction of palatine length. The synapomorphic discrete characters include a moderate post-toral sulcus, gently arched zygomaticoalveolar crest, presence of inferior orbital torus, strong malar tubercle, and thick mastoid processes.

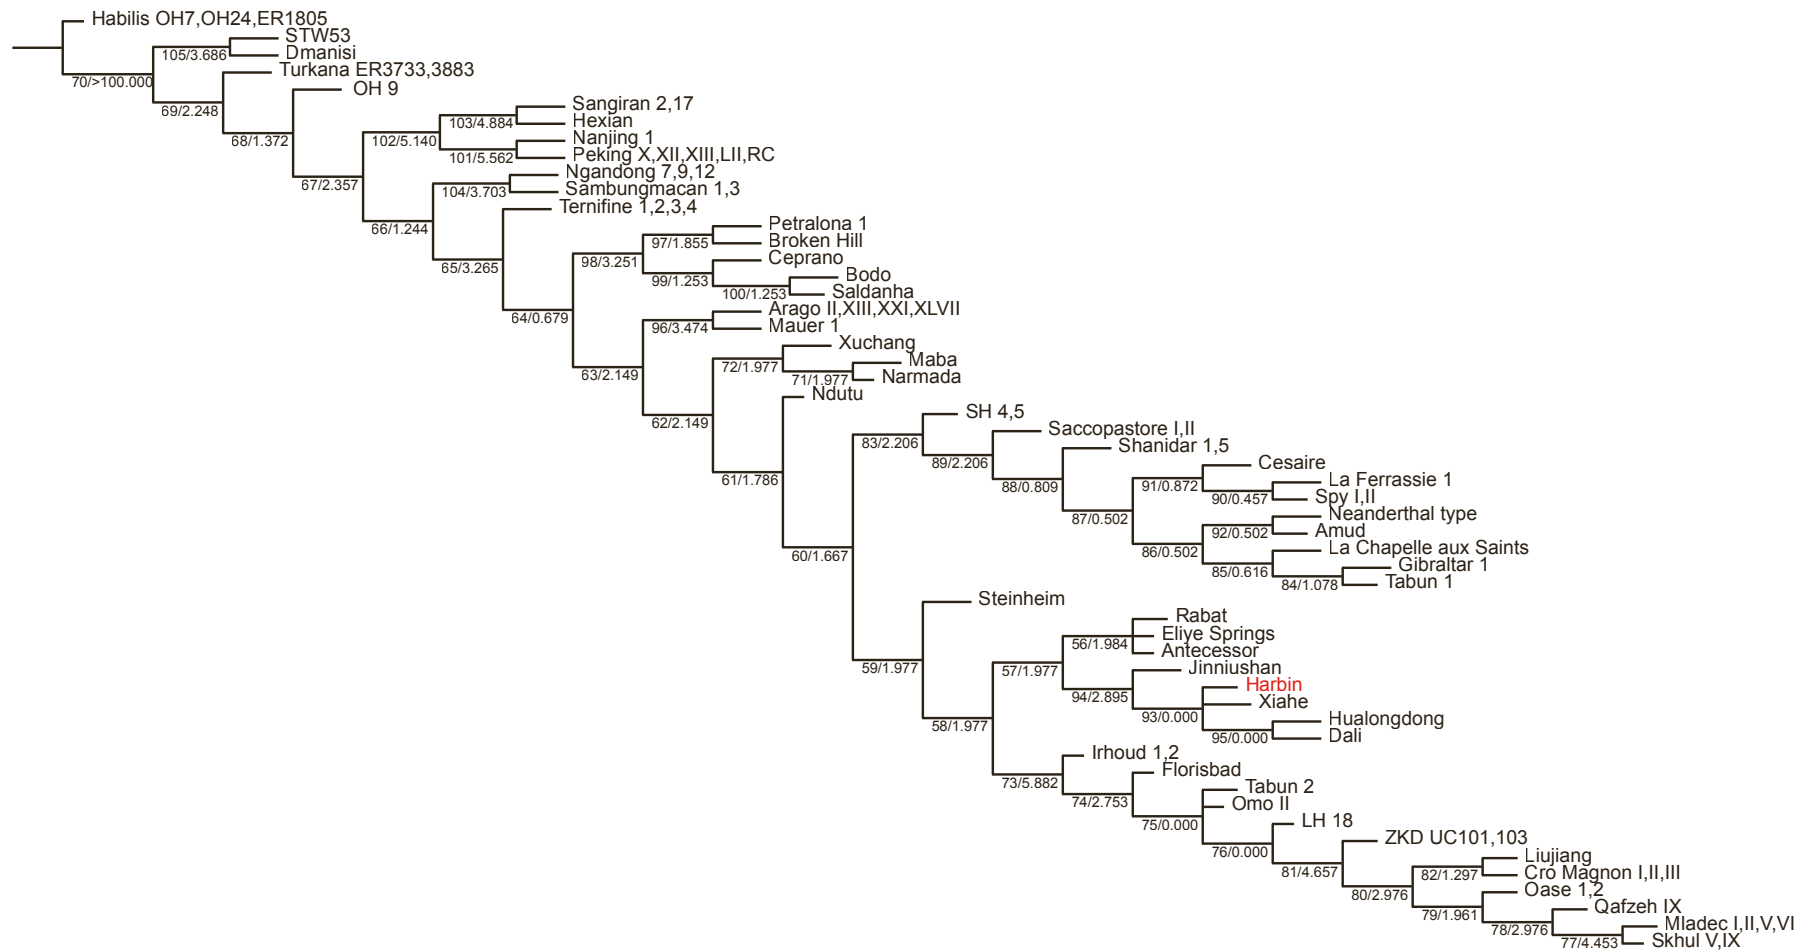

S-Figure 19. Majority-rule consensus tree of 25 most parsimonious trees. Number in front of a slash indicates the node number, while the number behind a slash indicates the Bremer support.

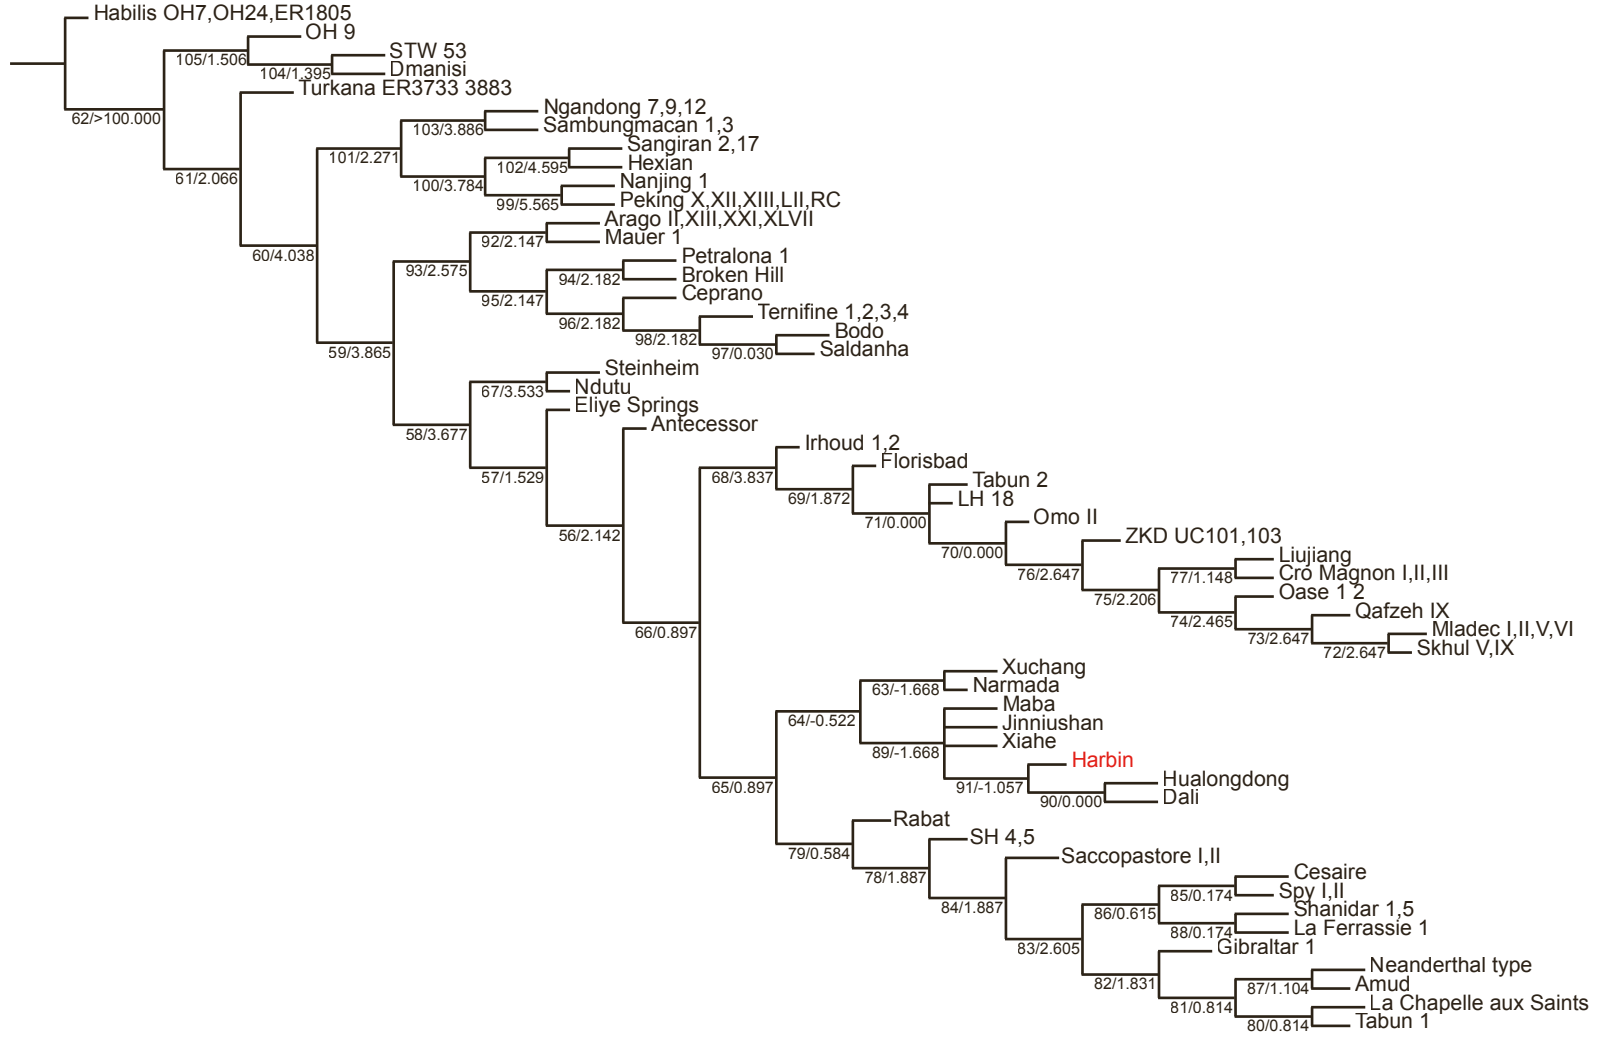

S-Figure 20. Majority-rule consensus trees of 55 most parsimonious trees. Backbone constraints were used to force Xiahe as the sister group of Neanderthals and *H. antecessor* outside of the Neanderthal-*H. sapiens* clade. Number in front of a slash indicates the node number, while the number behind a slash indicates the Bremer support.



S-Table 3. Comparison between the most parsimonious phylogenetic tree and the backbone constrained phylogenetic tree

|                                                                        | Most parsimonious tree | Backbone constrained tree |
|------------------------------------------------------------------------|------------------------|---------------------------|
| Replications                                                           | 1 million              | 1 million                 |
| Most parsimonious tree number                                          | 25                     | 55                        |
| Searching time                                                         | 30:45:48               | 30:46:24                  |
| Rearrangements examined                                                | 3,247,009,993,272      | 3,207,084,736,601         |
| Tree length                                                            | 2812.68                | 2818.90                   |
| Consistency Index                                                      | 0.26                   | 0.26                      |
| Retention Index                                                        | 0.46                   | 0.46                      |
| <i>Homo sapiens</i>                                                    | Monophyletic           | Monophyletic              |
| Neanderthals                                                           | Monophyletic           | Monophyletic              |
| <i>H. sapiens</i> -Harbin monophyly                                    | Supported              | Not supported             |
| <i>H. sapiens</i> -Xiahe monophyly                                     | Supported              | Not supported             |
| Neanderthal-Harbin monophyly                                           | Not supported          | Supported                 |
| Neanderthal-Xiahe monophyly                                            | Not supported          | Supported                 |
| Harbin-Xiahe-Dali-Jinniushan-Hualongdong monophyly                     | Supported              | Supported                 |
| Harbin-Maba-Narmada-Xuchang monophyly                                  | Not supported          | Supported                 |
| <i>Homo heidelbergensis</i> / <i>H. rhodesiensis</i>                   | Paraphyletic           | Paraphyletic              |
| <i>Homo heidelbergensis</i> / <i>H. rhodesiensis</i> -Harbin monophyly | Not supported          | Not supported             |
| <i>Homo heidelbergensis</i> / <i>H. rhodesiensis</i> -Maba monophyly   | Not supported          | Not supported             |
| <i>Homo erectus</i>                                                    | Paraphyletic           | Paraphyletic              |

S-Table 4. Synapomorphies shared by the Harbin human clade.

| Characters                                                      | Plesiomorphic states | Synapomorphic states |
|-----------------------------------------------------------------|----------------------|----------------------|
| Char. 12, M5(1). Nasion-opisthion length                        | 0.325-0.351          | 0.391                |
| Char. 26, M12. ASB. Biasterion breadth (ast-ast).               | 0.457                | 0.536                |
| Char. 48, ASI. Asterion-inion chord                             | 0.524                | 0.537                |
| Char. 50, Parietal chord index. M30/M1                          | 0.632-0.736          | 0.544-0.547          |
| Char. 58, M32(1). Frontal inclination angle (b-n-i)             | 0.606-0.698          | 0.566-0.602          |
| Char. 59, M32(2). Bregma angle (b-g-i). Frontal                 | 0.536-0.706          | 0.516-0.528          |
| Char. 61, M33d. OCA. Occipital angle (degree)                   | 0.461                | 0.241                |
| Char. 63, M33(4). Lambda-inion-opisthion angle (l-i-o)          | 0.518-0.540          | 0.400                |
| Char. 68, Temporal muscle attachment length                     | 0.344                | 0.519-0.531          |
| Char. 85, M43. FMT. Bi-frontomolare temporale breadth (fmt-fmt) | 0.462                | 0.522                |
| Char. 87, M43b. NAS. Nasio-frontal subtense                     | 0.502-0.566          | 0.596                |
| Char. 89, Frontal. Supraorbital torus breadth. XSOT             | 0.461                | 0.637                |

|                                                                                                      |                                          |                                  |
|------------------------------------------------------------------------------------------------------|------------------------------------------|----------------------------------|
| Char. 92, Supraorbital torus thickness lateral                                                       | 0.427-0.429                              | 0.514                            |
| Char. 94, M45. ZYB. Bizygomatic breadth (zy-zy)                                                      | 0.108-0.196                              | 0.316                            |
| Char. 95, M45(1). JUB. Bijugal breadth                                                               | 0.339                                    | 0.381                            |
| Char. 96, M46b. ZMB. Bimaxillary breadth                                                             | 0.266-0.280                              | 0.352-0.409                      |
| Char. 101, M74. Upper facial angle. Nasion-prosthion relative to the FH                              | 0.558-0.592                              | 0.632-0.711                      |
| Char. 104, Nasiospinale-alveolare angle                                                              | 0.618-0.718                              | 0.759-0.835                      |
| Char. 107, M50. IOW. Anterior interorbital breadth (mf-mf)                                           | 0.388-0.408                              | 0.512-0.867                      |
| Char. 109, M51a. OBB. Orbital breadth                                                                | 0.517-0.654                              | 0.679                            |
| Char. 110, M52. OBH. Orbital height                                                                  | 0.408-0.492                              | 0.552                            |
| Char. 126, M77a. NFA. Nasio-frontal angle (fm_a-n-fm_a)                                              | 0.451-0.571                              | 0.440                            |
| Char. 139, Midfacial prognathism                                                                     | 0.384-0.440                              | 0.208-0.361                      |
| Char. 216, Dental. Upper P3. Width/length                                                            | 0.406-0.466                              | 0.318                            |
| Char. 240, Dental. Upper M2. Hypocone size. ASUDAS grades. UM2HC                                     | 0.583                                    | 0.500                            |
| Char. 332, Ratio, Auriculare-vertex projection height/Maximum cranial breadth                        | 0.423                                    | 0.417                            |
| Char. 334, Ratio, Frontal sagittal chord/Parietal sagittal chord                                     | 0.139-0.172                              | 0.212-0.243                      |
| Char. 339, Ratio, Occipital angle/Parietal angle                                                     | 0.526                                    | 0.336                            |
| Char. 354, Cheek height/Supraorbital breadth                                                         | 0.292                                    | 0.230                            |
| Char. 355, Ratio, Interorbital breadth (d-d)/Supraorbital breadth                                    | 0.276-0.300                              | 0.240                            |
| Char. 358, Ratio, Maxilloalveolar breadth/Maxilloalveolar length                                     | 0.376                                    | 0.269-0.270                      |
| Char. 406, Frontal. Anterior view. Supraorbital sulcus                                               | Shallow                                  | Absent                           |
| Char. 409, Frontal. Anterior view, superior view. Supraorbital trigon surface topography             | Posteriorly concave                      | Flat                             |
| Char. 430, Frontal. Double temporal line on the frontal                                              | Absent                                   | Present                          |
| Char. 452, Maxillary. Anterior view. Anterior nasal sill crest                                       | Absent or very weak                      | Present                          |
| Char. 453, Maxillary. Anterior view. Anterior nasal sill central spine                               | Small                                    | Large                            |
| Char. 467, Parietal. Thickness at parietal eminence (or the centre)                                  | Intermediate                             | Thick                            |
| Char. 484, Occipital. Ventral view. opisthionic recess (narrowing) at the rear of the foramen magnum | Absent                                   | Present                          |
| Char. 493, Temporal. Posterior view. Mastoid foramen position                                        | Lateral to the temporal-occipital suture | At the temporal-occipital suture |
| Char. 502, Temporal. Ventral view. Glenoid fossa anterior-posterior width                            | Relatively broad                         | Very broad                       |
| Char. 511, Temporal. Ventral view. Tympanic plate orientation                                        | More coronally orientated                | More sagittally orientated       |

S-Table 5. Synapomorphies shared by the *H. sapiens* clade.

| Characters                                                              | Plesiomorphic states | Synapomorphic states |
|-------------------------------------------------------------------------|----------------------|----------------------|
| Char. 13, M6. ba-sphba. Basilar length                                  | 0.347-0.352          | 0.479                |
| Char. 19, Ratio, Maximum biparietal breadth / maximum bimastoid breadth | 0.492                | 0.514-0.618          |
| Char. 62, M33e. PAA. Parietal angle (degree)                            | 0.287-0.368          | 0.411-0.436          |

|                                                                                                                                                                                                                     |             |             |
|---------------------------------------------------------------------------------------------------------------------------------------------------------------------------------------------------------------------|-------------|-------------|
| Char. 64, Temporal squama length                                                                                                                                                                                    | 0.246-0.277 | 0.360-0.396 |
| Char. 65, Temporal squama height                                                                                                                                                                                    | 0.524-0.619 | 0.297       |
| Char. 66, Temporal squama angle                                                                                                                                                                                     | 0.338-0.581 | 0.278       |
| Char. 76, Postglenoid-ectoglenoid length                                                                                                                                                                            | 0.376-0.420 | 0.456-0.475 |
| Char. 105, M48d. WMH. Cheek height                                                                                                                                                                                  | 0.282-0.315 | 0.228-0.271 |
| Char. 115, Maxilloalveolar length                                                                                                                                                                                   | 0.370       | 0.327       |
| Char. 136, Malar angle. Posterior-inferior angle between the Frankfurt horizontal and the chord connecting the most inferior-lateral point of the orbit and the most inferior point on the malaria-maxillary suture | 0.243       | 0.269       |
| Char. 143, Gonion condylar height                                                                                                                                                                                   | 0.479-0.560 | 0.696       |
| Char. 147, Condylar neck length                                                                                                                                                                                     | 0.589       | 0.638       |
| Char. 158, Mandibular corpus height at p3                                                                                                                                                                           | 0.557-0.594 | 0.698-0.732 |
| Char. 159, Mandibular corpus height at p4                                                                                                                                                                           | 0.582-0.616 | 0.726-0.825 |
| Char. 188, Symphysis height (id-gn)                                                                                                                                                                                 | 0.339-0.414 | 0.573-0.702 |
| Char. 229, Dental. Upper M1. Metacone size. ASUDAS grades. UM1MC                                                                                                                                                    | 0.333-0.444 | 0.666       |
| Char. 239, Dental. Upper M2. Metacone size. ASUDAS grades. UM2MC                                                                                                                                                    | 0.300-0.400 | 0.500       |
| Char. 248, Dental. Upper M3. Area relative to M1                                                                                                                                                                    | 0.163-0.281 | 0.301       |
| Char. 293, Dental. Lower m2. Anterior Fovea. ASUDAS grades                                                                                                                                                          | 0.500       | 0.250       |
| Char. 298, Dental. Lower m3. Mesiodistal length                                                                                                                                                                     | 0.236-0.363 | 0.392       |
| Char. 300, Dental. Lower m3. Width/length                                                                                                                                                                           | 0.589-0.655 | 0.420       |
| Char. 302, Dental. Lower m3. Anterior Fovea. ASUDAS grades. As LM1AF                                                                                                                                                | 0.500-0.833 | 0.250       |
| Char. 328, Ratio, Basion-Bregma height/Maximum cranial breadth                                                                                                                                                      | 0.221-0.317 | 0.445       |
| Char. 329, Ratio, Basion-Bregma height/Maximum cranial length                                                                                                                                                       | 0.316-0.433 | 0.567       |
| Char. 334, Ratio, Frontal sagittal chord/Parietal sagittal chord                                                                                                                                                    | 0.139-0.172 | 0.112-0.129 |
| Char. 335, Ratio, b-sphn bregma-sphenion chord/l-ast lambda-asterion chord                                                                                                                                          | 0.210       | 0.305-0.326 |
| Char. 340, Ratio, Temporal squama height/Temporal squama length                                                                                                                                                     | 0.583-0.596 | 0.304       |
| Char. 342, Ratio, Postglenoid-ectoglenoid length/Postglenoid-entoglenoid length                                                                                                                                     | 0.437       | 0.473-0.560 |
| Char. 358, Ratio, Maxilloalveolar breadth/Maxilloalveolar length                                                                                                                                                    | 0.376-0.380 | 0.388-0.442 |
| Char. 364, Ratio, External alveolar breadth at M1-M2/External alveolar breadth at canine                                                                                                                            | 0.359-0.388 | 0.417       |
| Char. 385, Ratio, External breadth at i2/canine along the alveolar margin/External breadth at canine along the alveolar margin                                                                                      | 0.338-0.437 | 0.486-0.588 |
| Char. 408, Frontal. Anterior view. Supraorbital lateral tubercle                                                                                                                                                    | Very large  | Large       |
| Char. 422, Frontal 4. Anterior view. Glabellar inflexion                                                                                                                                                            | Deep        | Shallow     |
| Char. 437, Maxillary. Anterior view. Lateral view. Paranasal inflation. Maxilla superior lateral inflation of the bone surrounding the nasal aperture                                                               | Present     | Absent      |
| Char. 439, Maxillary. Anterior view. Dorsal-ventral position of the root of the zygomaticoalveolar crest                                                                                                            | Intermedia  | High        |
| Char. 496, Temporal. Ventral view. Preglenoid planum                                                                                                                                                                | Small       | Large       |
| Char. 512, Temporal. Lateral view. Tympanic plate thickness                                                                                                                                                         | Moderate    | Thin        |
| Char. 529, Mandible 4. Anterior view. Mental tubercle                                                                                                                                                               | Absent      | Strong      |
| Char. 531, Mandible 6. Anterior view. Mental fossa                                                                                                                                                                  | Absent      | Shallow     |

|                                                                                               |                       |             |
|-----------------------------------------------------------------------------------------------|-----------------------|-------------|
| Char. 563, Mandible. Anterior view. Canine pillar                                             | Low                   | Moderate    |
| Char. 582, Mandible 52. Superior view, medial view. Symphysis planum alveolare (simian shelf) | Preset<br>small/large | Absent      |
| Char. 614, Lower p3. Occlusal view. Crown shape                                               | Asymmetrical          | Symmetrical |

S-Table 6. Synapomorphies shared by the Neanderthal clade.

| Characters                                                               | Plesiomorphic states | Synapomorphic states |
|--------------------------------------------------------------------------|----------------------|----------------------|
| Char. 1, M1. GOL. g-op. Maximum cranial length                           | 0.263-0.270          | 0.185                |
| Char. 19, Ratio, Maximum biparietal breadth / maximum bimaistoid breadth | 0.492                | 0.564-0.708          |
| Char. 31, Maximum mastoid width                                          | 0.214-0.294          | 0.212                |
| Char. 52, M31(1). LIC. Lambda-inion chord (l-i)                          | 0.562                | 0.417-0.435          |
| Char. 53, Lambda-opisthocranion chord                                    | 0.445-0.586          | 0.419-0.433          |
| Char. 65, Temporal squama height                                         | 0.524                | 0.455-0.477          |
| Char. 68, Temporal muscle attachment length                              | 0.276-0.327          | 0.117-0.183          |
| Char. 69, Temporal muscle attachment length index                        | 0.243-0.253          | 0.144-0.224          |
| Char. 71, Tympanic axis angle                                            | 0.495-0.502          | 0.540                |
| Char. 82, Occipital plane index                                          | 0.649-0.699          | 0.450-0.506          |
| Char. 111, M54. NBL. Nasal breadth                                       | 0.305-0.329          | 0.471-0.513          |
| Char. 112, M57(2). Upper nasal breadth of nasal bones                    | 0.467                | 0.476-0.755          |
| Char. 129, Nasal bridge index                                            | 0.315-0.337          | 0.236                |
| Char. 130, Nasal bridge angle                                            | 0.446                | 0.620-0.630          |
| Char. 138, Mandibular fossa depth                                        | 0.333-0.468          | 0.245-0.297          |
| Char. 193, Dental. Upper I1. Area relative to M1                         | 0.411-0.417          | 0.472                |
| Char. 226, Dental. Upper M1. Mesiodistal length                          | 0.542-0.561          | 0.392-0.463          |
| Char. 228, Dental. Upper M1. Width/length                                | 0.265-0.330          | 0.367-0.459          |
| Char. 235, Dental. Upper M2. Mesiodistal length                          | 0.271                | 0.101-0.149          |
| Char. 236, Dental. Upper M2. Buccolingual width                          | 0.212                | 0.049-0.133          |
| Char. 237, Dental. Upper M2. Width/length                                | 0.533-0.618          | 0.749                |
| Char. 238, Dental. Upper M2. Area relative to M1                         | 0.227-0.274          | 0.081-0.154          |
| Char. 271, Dental. Lower p3. Mesiodistal length                          | 0.176-0.248          | 0.064                |
| Char. 272, Dental. Lower p3. Buccolingual width                          | 0.295-0.358          | 0.173-0.286          |
| Char. 276, Dental. Lower p4. Mesiodistal length                          | 0.309-0.336          | 0.063-0.064          |
| Char. 277, Dental. Lower p4. Buccolingual width                          | 0.231-0.232          | 0.080-0.129          |
| Char. 279, Dental. Lower p4. Area relative to m1                         | 0.528-0.621          | 0.419                |
| Char. 281, Dental. Lower m1. Mesiodistal length                          | 0.323-0.365          | 0.058-0.061          |
| Char. 282, Dental. Lower m1. Buccolingual width                          | 0.231-0.292          | 0.116-0.190          |
| Char. 283, Dental. Lower m1. Width/length                                | 0.489-0.523          | 0.716-0.746          |
| Char. 289, Dental. Lower m2. Mesiodistal length                          | 0.212-0.238          | 0.044-0.063          |

|                                                                                                                                |                                                       |                                             |
|--------------------------------------------------------------------------------------------------------------------------------|-------------------------------------------------------|---------------------------------------------|
| Char. 290, Dental. Lower m2. Buccolingual width                                                                                | 0.245-0.326                                           | 0.174-0.201                                 |
| Char. 301, Dental. Lower m3. Area relative to m1                                                                               | 0.627-0.722                                           | 0.773-0.787                                 |
| Char. 333, Ratio, n-b frontal sagittal chord/Glabella-bregma chord                                                             | 0.417-0.474                                           | 0.593-0.645                                 |
| Char. 342, Ratio, Postglenoid-ectoglenoid length/Postglenoid-entoglenoid length                                                | 0.437                                                 | 0.499                                       |
| Char. 355, Ratio, Interorbital breadth (d-d)/Supraorbital breadth                                                              | 0.276-0.300                                           | 0.389-0.577                                 |
| Char. 356, Ratio, Orbital height OBH/Orbital breadth OBB                                                                       | 0.410-0.441                                           | 0.501                                       |
| Char. 358, Ratio, Maxilloalveolar breadth/Maxilloalveolar length                                                               | 0.376-0.380                                           | 0.440-0.529                                 |
| Char. 366, Ratio, Maximum malar length/Bimaxillary breadth                                                                     | 0.354                                                 | 0.410-0.585                                 |
| Char. 378, Ratio, Mandibular corpus height at canine/Infradentale to the posterior edge of the last molar at the aveolar level | 0.256-0.433                                           | 0.608-0.627                                 |
| Char. 384, Ratio, Condyle articular facet breadth/Infradentale to the posterior edge                                           | 0.378-0.385                                           | 0.468                                       |
| Char. 403, Frontal. Anterior view. Supraorbital torus parallel-bordered                                                        | Absent                                                | Present                                     |
| Char. 410, Frontal. Anterior view, superior view. Supraorbital trigon orientation                                              | Posterior-lateral                                     | Mainly lateral, slightly posterior          |
| Char. 412, Frontal 6. Superior view. Supraorbital torus arching in superior view                                               | Gently arching                                        | Strongly arching                            |
| Char. 414, Frontal. Superior view. Glabella concavity relative to the supraorbital tori                                        | Shallow                                               | Absent                                      |
| Char. 423, Frontal. Mid-sagittal supraglabellary tubercle                                                                      | Absent                                                | Present                                     |
| Char. 433, Maxillary. Medial view. Lack of an ossified roof over the lacrimal groove                                           | No                                                    | Yes                                         |
| Char. 435, Maxillary. Anterior view, medial view. Inferior concha covering the lacrimal groove                                 | Present                                               | Absent                                      |
| Char. 441, Maxillary. Ventral view. Anterior-posterior position of the root of the zygomaticoalveolar crest                    | M1-M2                                                 | M2-M3                                       |
| Char. 464, Parietal. Lateral view. Posterior view                                                                              | Position of the superior temporal line. Intermediate  | Low                                         |
| Char. 471, Occipital. Posterior inferior view. Superior nuchal line                                                            | Moderately developed                                  | Highly elevated                             |
| Char. 493, Temporal. Posterior view. Mastoid foramen position                                                                  | Lateral to the temporal-occipital suture              | At the temporal-occipital suture            |
| Char. 511, Temporal. Ventral view. Tympanic plate orientation                                                                  | More coronally orientated                             | More sagittally orientated                  |
| Char. 521, Nasal. Lateral view. Nasal root projecting                                                                          | Deeply concave                                        | At the same sagittal level as the glabella. |
| Char. 532, Mandible 7. Anterior view. Inferior marginal thickening                                                             | Present, thick                                        | Absent                                      |
| Char. 549, Mandible 22. Lateral view. Retromolar space shielded by the ramus                                                   | Completely shielded, shielding part of the last molar | No shielding, large space visible           |

S-Table 7. Synapomorphies shared by Harbin-*H. sapiens* clade

| Characters                                                                                                                           | Plesiomorphic states             | Synapomorphic states |
|--------------------------------------------------------------------------------------------------------------------------------------|----------------------------------|----------------------|
| Char. 22, M10. XFB. Maximum frontal breadth. Frontal                                                                                 | 0.585-0.588                      | 0.689-0.720          |
| Char. 27, M14. WCB. Minimum cranial breadth                                                                                          | 0.340-0.388                      | 0.463-0.501          |
| Char. 35, M20. Porion-bregmatic projective height                                                                                    | 0.351-0.466                      | 0.575-0.595          |
| Char. 46, M30(2). Bregma-sphenion chord (b-sphn)                                                                                     | 0.445-0.521                      | 0.658-0.665          |
| Char. 49, M30c. Bregma-asterion chord (b-ast)                                                                                        | 0.431-0.567                      | 0.746                |
| Char. 77. Postglenoid-entoglenoid length                                                                                             | 0.309                            | 0.333-0.395          |
| Char. 84, M40. BPL. Basion-prosthion length                                                                                          | 0.257-0.322                      | 0.129-0.250          |
| Char. 86, M43a. FMB. Bifrontal breadth. Frontal                                                                                      | 0.385-0.462                      | 0.512                |
| Char. 88, M43b/M43a. Nasion-frontal subtense relative to the bifrontal breadth                                                       | 0.338-0.582                      | 0.619-0.624          |
| Char. 116. Maxillary palate length                                                                                                   | 0.494                            | 0.333-0.380          |
| Char. 124, M76a. SSA. Zygomatic angle (degree)                                                                                       | 0.185                            | 0.268-0.294          |
| Char. 133. Zygomatic anterior-zygoorbitale (zm:a-zo)                                                                                 | 0.342                            | 0.303-0.338          |
| Char. 223. Dental. Upper P4. Area relative to M1                                                                                     | 0.220-0.228                      | 0.242-0.324          |
| Char. 335. Ratio, b-sphn bregma-sphenion chord/l-ast lambda-asterion chord                                                           | 0.189                            | 0.210                |
| Char. 344. Ratio, Basion-prosthion length/Maximum cranial length                                                                     | 0.411-0.462                      | 0.150-0.184          |
| Char. 346. Ratio, Bi-frontomolare temporale breadth/Maximum frontal breadth                                                          | 0.498                            | 0.480                |
| Char. 354. Ratio, Cheek height/Supraorbital breadth                                                                                  | 0.405-0.481                      | 0.292-0.315          |
| Char. 356. Ratio, Orbital height OBH/Orbital breadth OBB                                                                             | 0.389                            | 0.309-0.356          |
| Char. 368. Ratio, Inferior zygomatic margin height/Bimaxillary breadth                                                               | 0.550-0.607                      | 0.490                |
| Char. 421. Frontal. Lateral view. Posttoral sulcus. Concavity of the region between supraorbital torus and frontal squama            | Deep                             | Moderate             |
| Char. 438. Maxillary. Anterior view. Zygomaticoalveolar crest                                                                        | Oblique                          | Gently arched        |
| Char. 440. Zygomatic. Maxillary. Anterior view. Zygomaticoalveolar crest (Inferior zygomaticomaxillary margin) extends to the zygion | Present                          | Absent               |
| Char. 442. Zygomatic. Maxillary. Anterior view. Inferior orbital torus                                                               | Absent                           | Present              |
| Char. 443. Zygomatic. Maxillary. Anterior view, lateral view. Malar tubercle                                                         | Absent or weak                   | Strong               |
| Char. 486. Temporal. Posterior view. Mastoid process thickness                                                                       | Thin                             | Thick                |
| Char. 488. Temporal-occipital. Posterior view. Juxtamastoid process (or eminence)                                                    | Absent                           | Small                |
| Char. 489. Temporal. Posterior view. Ventral view. Sulcus for occipital artery                                                       | Absent                           | Present              |
| Char. 504. Temporal. Ventral view. Glenoid fossa overhang                                                                            | Equal or greater than 50 percent | Less than 50 percent |

### Bayesian inference and tip-dating analyses

We used the Bayesian tip-dating approach<sup>68-71</sup> implemented in MrBayes 3.2.7<sup>72</sup> to infer the timetree and evolutionary rates. The method integrates both fossil ages and morphological data in a coherent analysis, while accounting for their uncertainties in a coherent analysis. The morphological data (both discrete and continuous characters) are treated as two data partitions. For the discrete data, the Lewis Mk model with variable ascertainment

bias correction<sup>73</sup> and gamma rate variation across characters<sup>74</sup> (Mkv+ $\Gamma$ ) was used for the likelihood calculation. 46 characters were defined as ordered and the rest of them (188 characters) were unordered (See the Characters for phylogenetic analysis section). Since MrBayes 3.2.7 cannot handle continuous characters directly and can deal with ordered characters only up to six states, all the continuous characters (400 characters) were discretised into six states. This is done by first dividing the range of 0 and 1 into six equal-length intervals (numbered as 0 to 5) and then converting each trait value into a state according to its interval assignment (Appendix 8). The discretised continuous characters were all defined as ordered to fit the nature of gradual change and modelled under Mkv+ $\Gamma$ . We note that RevBayes<sup>75, 76</sup> can handle continuous characters directly without discretisation. However, the software is still under development and the functionalities related to tip-dating using both discrete and continuous characters were not working when we were planning this study (see <https://github.com/revbayes/revbayes/issues>). Thus, we used MrBayes 3.2.7 for dating purpose, which is more established and produced more reliable results.

We now describe the prior usages in the Bayesian inference. The Mkv+ $\Gamma$  model has only one free parameter, the gamma shape<sup>74</sup>, which was assigned an exponential(1.0) prior by default. The gamma shape models rate variation within each partition, while the evolutionary rate variation among the two data partitions were accounted for using a uniform Dirichlet prior<sup>70</sup>. The prior for the timetree was modelled by the fossilized birth-death (FBD) process<sup>70, 77-79</sup>. The process is conditioned on the time of the most recent common ancestor (root age) and has hyperparameters of speciation rate, extinction rate, fossil-sampling rate and extant-sampling probability. It has long been hypothesized that the origin of the genus *Homo* was related to the climatic and environmental shifts around 3.0-2.6 Ma in the Late Pliocene<sup>80, 81</sup>. The root age was assigned an offset-exponential prior with a mean age of 3600 kyr and minimum age of 2800 kyr, referring to the potentially oldest fossil of *Homo habilis*<sup>82, 83</sup> and the beginning of the Late Pliocene epoch. The ages of the fossil tips were either fixed or given uniform distributions based on the corresponding stratigraphic ranges. The speciation, extinction and fossil-sampling rates were reparametrized for convenience<sup>70, 78</sup>. The net diversification rate (speciation rate minus extinction rate) was assigned an exponential(200) prior with mean 0.005 which ranges from zero to infinity and puts less weight on higher rate. The turn-over rate (extinction rate over speciation rate, which is between 0 and 1) and relative fossil-sampling rate (fossil-sampling rate over the sum of extinction rate and fossil-sampling rate, which is also between 0 and 1) were both assigned a uniform(0,1) prior. The extant-sampling probability was fixed to 1.0 by default.

Apart from the timetree, the other key component in the Bayesian tip-dating analysis is the relaxed clock model, which models the evolutionary rate variation along the branches in the tree. We used the white noise (WN)<sup>84</sup> model, in which the branch rates follow independent gamma distributions. The mean clock rate was assigned an exponential (300) prior (about 3 changes per 1000 characters per thousand years) and the variance parameter of the clock rate was exponential(2). As the discrete and continuous characters probably have distinct patterns of change through time, we unlinked the clock variance in these two partitions so that the evolutionary rate varies independently between partitions.

We executed four independent runs and 8 chains per run (1 cold and 7 hot chains with temperature 0.05) in the Markov chain Monte Carlo (MCMC) simulation. Each run was executed with 100 million iterations and sampled every 2000 iterations. The first 30% of samples were discarded as burn-in and the rest from two runs were combined. Good convergence and mixing were diagnosed by an effective sample size (ESS)<sup>85</sup> larger than 200 for all parameters and the average standard deviation of split frequencies (ASDSF)<sup>72</sup> smaller than 0.02. The posterior trees were summarized to both 50% majority-rule consensus tree and all-compatible consensus tree. The MrBayes commands are provided in Appendix 9. The analysis took about 83 hours using the parallel version of MrBayes on



our computing cluster.

The initial run with no topological constraint was not able to resolve the phylogenetic relationship in the clade containing *H. heidelbergensis*/*H. rhodesiensis*, Harbin, Maba, Neanderthals and *H. sapiens* in the majority-rule consensus tree. The all-compatible consensus tree is more resolved but we note that the posterior probabilities are very low for many clades, and those with probabilities smaller than 0.5 were collapsed into polytomies in the majority-rule consensus tree. On one hand, the consensus tree summarized all the trees in the posterior credibility region instead of just taking one most probable tree (e.g., the maximum a posteriori (MAP) tree or most parsimonious tree), and thus represents more uncertainty from the posterior region. On the other hand, discretising the continuous characters reduced the amount of information contained in the original data thus would also increase the uncertainty in the consensus tree. We further enforced a few backbone constraints based on the parsimony analysis, which handled the continuous characters directly without discretization (S-Fig. 19). The preferred Bayesian tip-dating phylogenetic tree is shown in S-Fig. 21.

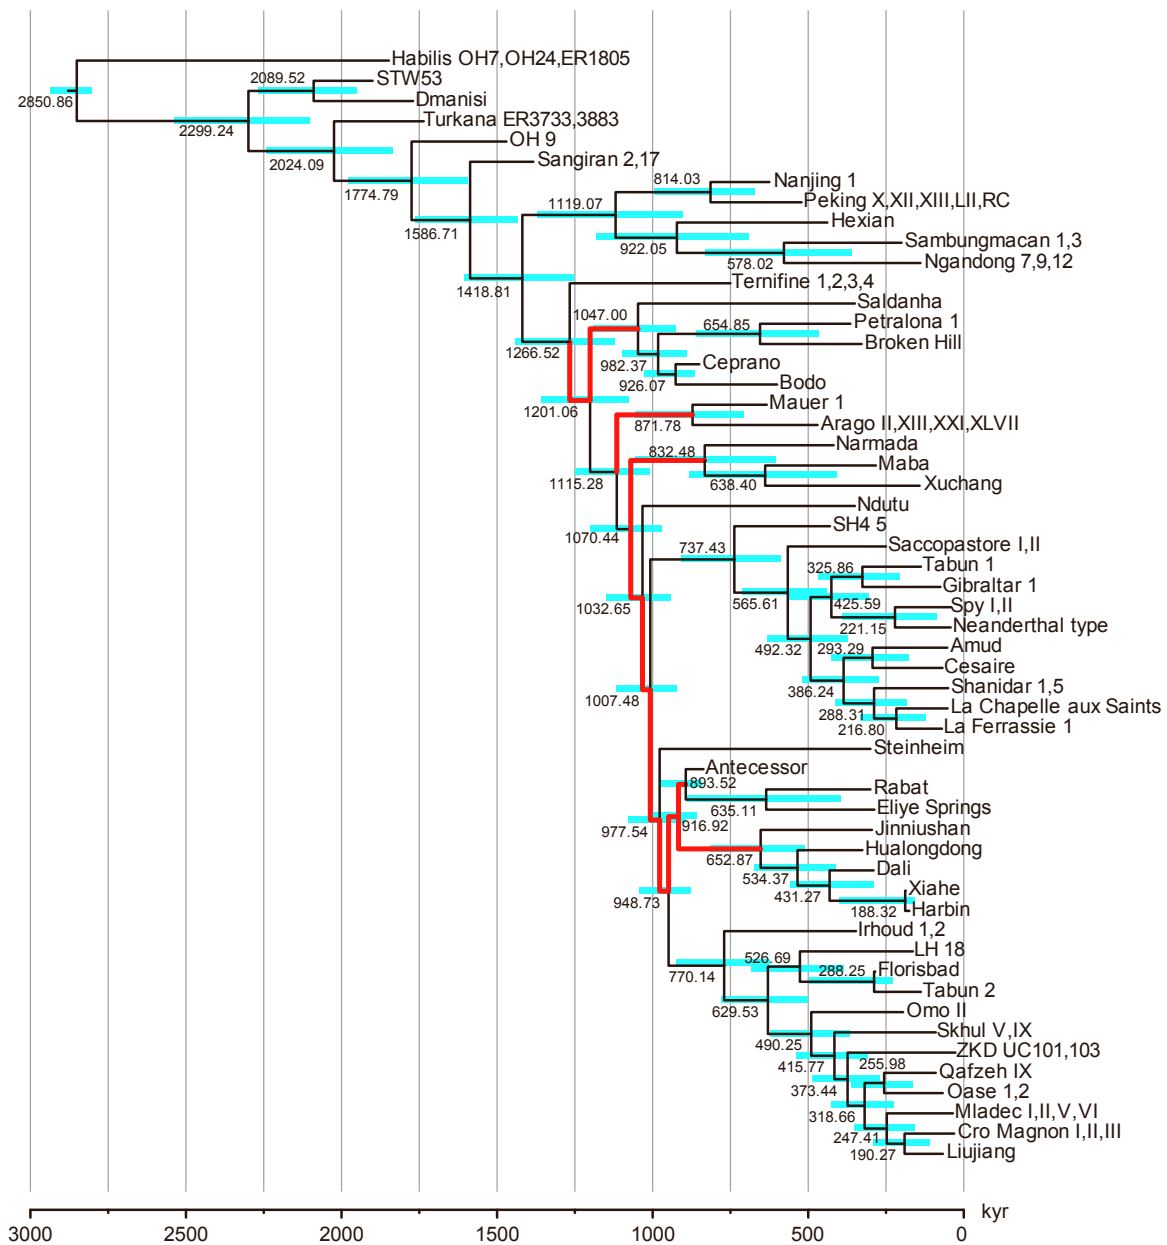

S-Figure 21. Phylogeny of the 55 selected OTUs from the genus *Homo*. This timetree was inferred from the Bayesian tip-dating analysis using MrBayes 3.2.7 and summarized as the all-compatible tree. The tip-date for the Harbin cranium is set as  $148 \pm 2$  ka. To reduce the polytomy at some clades, the strict consensus of the most parsimonious trees from the parsimony analysis (S-Fig. 19) was used as a reference. The branches in red indicate the backbone constraints based on the most parsimonious trees. Branch lengths are proportional to the division age in thousand years. Numbers at the internal nodes are the median ages, and the blue bars indicate the 95% highest posterior density interval of the node ages.

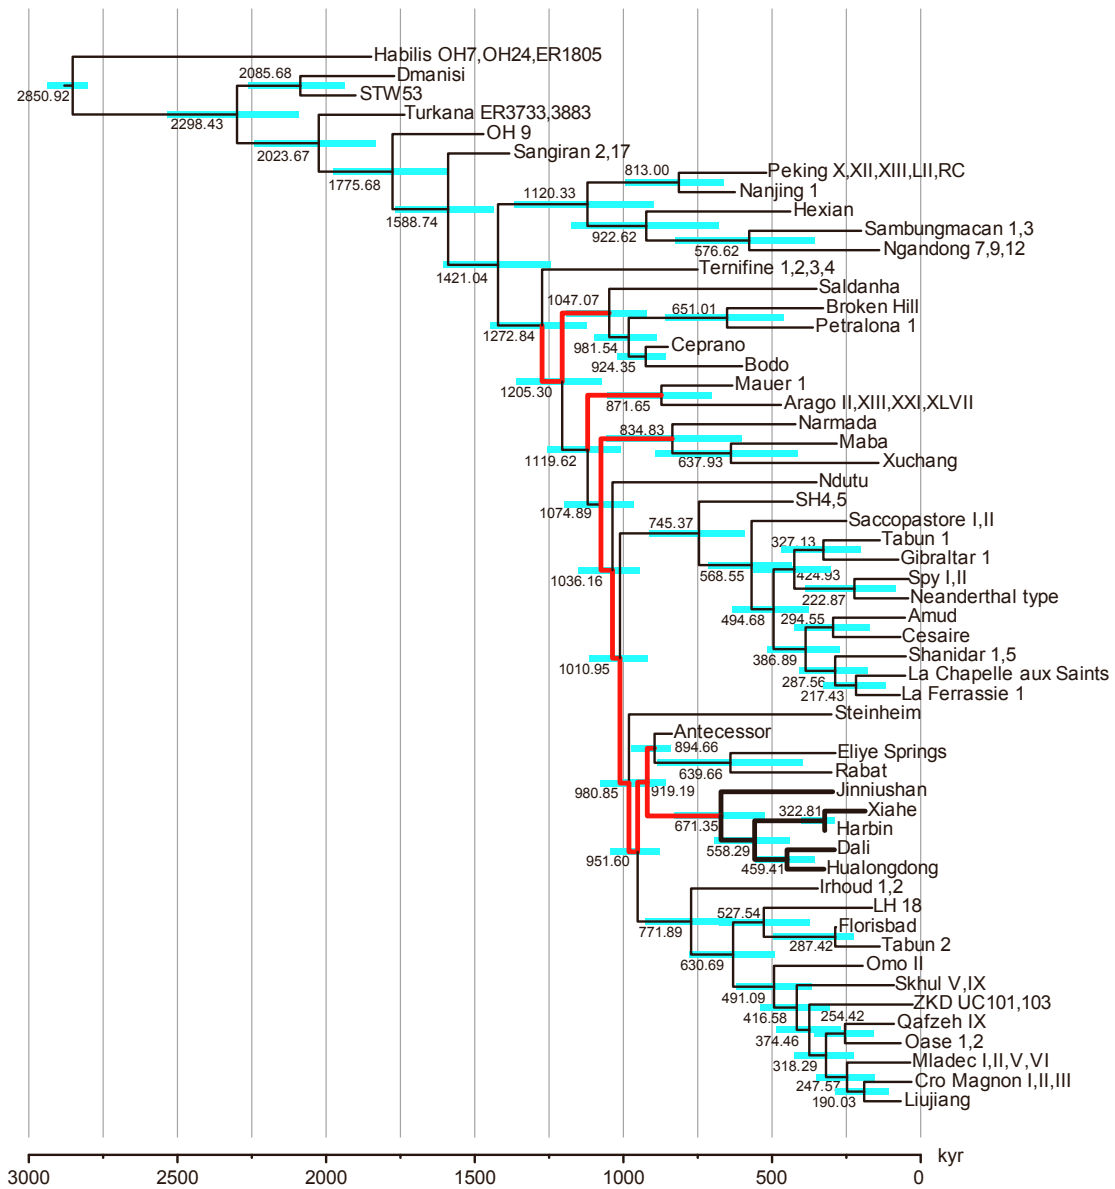

S-Figure 22. Phylogeny of the 55 selected OTUs from the genus *Homo*. This timetree was inferred from the Bayesian tip-dating analysis using MrBayes 3.2.7 and summarized as the all-compatible tree. The tip-date for the Harbin cranium is set as 296±8 ka. To reduce the polytomy at some clades, the strict consensus of the most parsimonious trees from the parsimony analysis (S-Fig. 19) was used as a reference. The branches in red indicate the backbone constraints based on the most parsimonious trees. The branches in bold lines indicate the significant differences compared with the preferred phylogeny in S-Fig. 21. Branch lengths are proportional to the division age in thousand years. Numbers at the internal nodes are the median ages, and the blue bars indicate the 95% highest posterior density interval of the node ages.

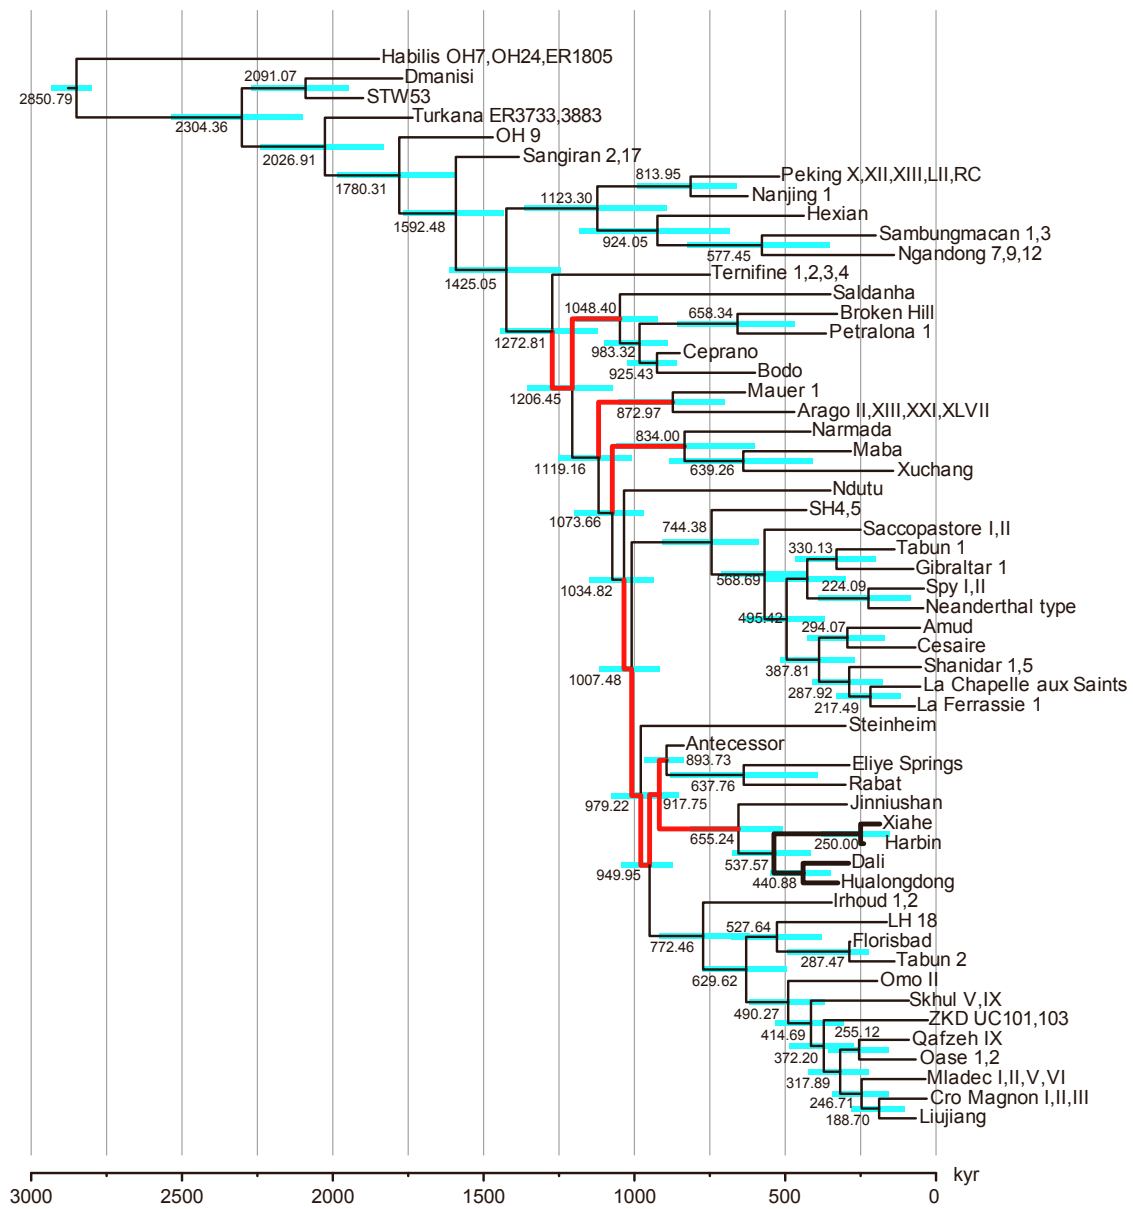

S-Figure 23. Phylogeny of the 55 selected OTUs from the genus *Homo*. This timetree was inferred from the Bayesian tip-dating analysis using MrBayes 3.2.7 and summarized as the all-compatible tree. The tip-date for the Harbin cranium is set as 59-304 ka. To reduce the polytomy at some clades, the strict consensus of the most parsimonious trees from the parsimony analysis (S-Fig. 19) was used as a reference. The branches in red indicate the backbone constraints based on the most parsimonious trees. The branches in bold lines indicate the significant differences compared with the preferred phylogeny in S-Fig. 21. Branch lengths are proportional to the division age in thousand years. Numbers at the internal nodes are the median ages, and the blue bars indicate the 95% highest posterior density interval of the node ages.

The U-series dating on the Harbin cranium shows a large variation range. As discussed above, the most reliable minimum date of the cranium is 146 ka. To test whether different age estimates for the Harbin cranium will change its phylogenetic position in the Bayesian tip-dating analyses, we also used  $296 \pm 8$  ka (the maximum U-series age) and 59 - 304 ka (the maximum U-series age range) as the tip ages for the Harbin cranium. All the other parameters and dates are unchanged. The results suggest that different tip age estimates for the Harbin cranium have only very minor influences on the topology and the divergence age estimation of the whole tree (S-Fig. 22, 23). Only the divergence times between Harbin, Xiahe, Dali and Hualongdong are significantly altered.

In both the parsimony and Bayesian analyses, the morphological characters (both discrete and continuous) were treated as independent data points, and thus no correlations among characters were considered. This follows the most common practice in morphological data analyses, and indeed, most characters can be assumed to be independent. However, some characters are likely to be correlated due to their anatomical structure or synergy in function. Here we discuss the potential biases that could be introduced and the further work that needs to be done. When we built the data matrix, we consciously avoided redundant and potentially correlated discrete characters. Normalisation of the continuous characters can significantly reduce the potential correlations. As parsimony has no explicit model assumption, the consequence of ignoring character correlation is hard to predict. One obvious consequence would be overestimating the number of changes (parsimony length) in the tree and would probably aggravate long-branch attraction. In Bayesian tip-dating analysis, the overestimation of character changes is reflected in the branch lengths, each of which is a product of divergence time and evolutionary rate. With sufficient fossils and relatively accurate ages, the divergence time estimates would be less affected while resulting in accelerated evolutionary rates. The ignorance of character correlation would also include erroneous or overconfident topological inference<sup>86</sup>, although simulation studies showed that the estimate is relatively robust<sup>87</sup>. Some studies also show that when the correlation is low, treating the characters as independent still can produce reliable estimates of topology and times<sup>87, 88</sup>. Further efforts are still needed in model developments for morphological characters.

Some recent analyses based on ancient DNA have produced relatively younger estimates of Neanderthal-*H. sapiens* divergence dates<sup>89</sup>. The approach is also tip dating -- using ancient DNA sequences as data and their ages as tip dates. Although there were abundant molecular sequences in their analyses, it does not necessarily mean that their estimates are more reliable than ours. Theoretical studies have shown that even with infinitely long molecular sequences (or infinitely many morphological characters analogously) so that the branch lengths (distances measured by expected number of substitutions per site) can be inferred without error, the divergence times and evolutionary rates are confounded and rely on the information of fossil ages (or calibration priors) and clock models to get resolved<sup>90, 91</sup>. They only included Neanderthals, Denisovans and *H. sapiens* with the oldest being the Sima de los Huesos early Neanderthal (~ 430 kyr), and lack information to inform the divergences near the root of the *Homo* genus. We included most of the major clades of the *Homo* genus, and thus we have more information from fossil ages to inform the divergence times of all the *Homo* clades. They also fixed the mutation rate<sup>89</sup> and thus put apparent certainty in the clock model, which might also bias the age estimates, while in our study, the clock rate was co-estimated with the divergence times from the tip-dating analysis. The FBD model that we used explicitly models the speciation, extinction and sampling processes and is more suitable for our data than the coalescent model<sup>92</sup> used by Posth et al.<sup>89</sup>, which is better suited for a single population without population structure.

## Biogeographical analyses

Biogeography is the study of geographic distribution pattern of any forms of life and the factors responsible for forming and changing the distribution pattern. It is a very old discipline, even dating back to the pre-Darwin era<sup>93</sup>. The evolutionary processes occurring over long temporal large spatial scale are the historical perspectives of biogeography, and the relevant study is primarily concerned with the evolutionary history of the geographic distribution of organisms<sup>93-96</sup>. Such a discipline is also called historical biogeography, and is generally regarded as a discipline of comparative biology<sup>93, 95</sup>. It is generally accepted that taxa sharing similar geographic distribution patterns and close position in the phylogenetic tree must have shared a common evolutionary history of biogeography<sup>93, 97</sup>. The idea that phylogenetic relationships reflects the evolutionary process of the geographic distribution can be traced back to Darwin and Wallace<sup>97</sup>. Since the cladistic methodology was applied in reconstructing the ancestral distribution areas across a phylogenetic tree, many quantitative methods and models for biogeographic analyses have been developed and widely used outside of palaeoanthropology<sup>96, 98, 99</sup>. These methods include cladistic biogeography, event-based biogeography and probabilistic biogeography<sup>93</sup>. The probabilistic biogeography is a parametric approach. The development of parametric modeling of geographic range evolution makes biogeographic problems accessible to statistical model-based methodologies (such as maximum-likelihood and Bayesian inference)<sup>93, 96, 98, 99</sup>.

The objectives of the biogeographic analyses in this research lie in two aspects: a) to statistically compare the models concerning the biogeographical origin and evolutionary history of the members of the *Homo* genus; b) to statistically estimate the historical biogeographical processes that have resulted in the geographical range evolution of *Homo*.

All biogeographical analyses were based on the Bayesian tip-dating all-compatible consensus tree (as in S-Fig. 21), which is more resolved than the majority-rule consensus tree, for biogeographical analyses. No pruning was needed for the downstream analyses. The geographic coordinates of the terminal OTUs are given in S-Table 8.

S-Table 8. The geographic coordinates of the terminal OTUs.

| OTUs                    | Latitude | Longitude |                        |       |        |
|-------------------------|----------|-----------|------------------------|-------|--------|
|                         |          |           | ZKD UC101,103          | 39.69 | 115.93 |
| Habilis OH7,OH24,ER1805 | -2.98    | 35.4      | Liujiang               | 24.25 | 109.33 |
| Antecessor              | 42.35    | -3.52     | SH 4,5                 | 42.35 | -3.52  |
| Narmada                 | 22.3     | 76.5      | Tabun 1                | 32.67 | 35     |
| Eliye Springs           | 3.24     | 36.02     | Tabun 2                | 32.67 | 35     |
| Ndutu                   | -3       | 35        | Spy I,II               | 50.48 | 4.67   |
| Irhoud 1,2              | 31.9     | -8.9      | Gibraltar 1            | 36.13 | -5.34  |
| Florisbad               | -28.7    | 26        | Amud                   | 32.95 | 35.3   |
| Omo II                  | 5.4      | 36.3      | La Chapelle aux Saints | 45    | 1.73   |
| LH 18                   | -2.99    | 35.4      | La Ferrassie 1         | 44.95 | 0.94   |
| Skhul V,IX              | 32.9     | 35.2      | Shanidar 1,5           | 36.83 | 44.22  |
| Qafzeh IX               | 32.7     | 35.3      | Cesaire                | 45.75 | -0.51  |
| Mladec I,II,V,VI        | 49.7     | 17        | Saccopastore I,II      | 41.93 | 12.53  |
| Cro Magnon I,II,III     | 44.94    | 1.02      | Neanderthal type       | 51.23 | 6.94   |
| Oase 1,2                | 45.02    | 21.82     | Xiahe                  | 35.2  | 102.52 |

|                          |        |        |
|--------------------------|--------|--------|
| Dali                     | 34.87  | 109.67 |
| Hualongdong              | 30.11  | 116.95 |
| Harbin                   | 45.82  | 126.69 |
| Jinniushan               | 40.58  | 122.45 |
| Maba                     | 24.75  | 113.5  |
| Xuchang                  | 34.07  | 113.68 |
| Mauer 1                  | 49.34  | 8.8    |
| Arago II,XIII,XXI,XLVII  | 42.84  | 2.75   |
| Broken Hill              | -14.43 | 28.45  |
| Petralona 1              | 40.38  | 23.17  |
| Ceprano                  | 41.53  | 13.51  |
| Steinheim                | 51.87  | 9.09   |
| Saldanha                 | -33.06 | 18.35  |
| Bodo                     | 10.4   | 40.6   |
| Ternifine 1,2,3,4        | 35.42  | 0.33   |
| Peking X,XII,XIII,LII,RC | 39.69  | 115.93 |
| Nanjing1                 | 32.05  | 110.05 |
| Hexian                   | 31.75  | 118.33 |
| Sambungmacan 1,3         | -7.41  | 111.1  |
| Sangiran 2,17            | -7.63  | 110.89 |
| Ngandong 7,9,12          | -7.78  | 110.55 |
| Dmanisi                  | 41.33  | 44.21  |
| Rabat                    | 34     | -6.9   |
| STW53                    | -26.02 | 27.73  |
| OH 9                     | -2.98  | 35.4   |
| Turkana ER3733,3883      | 3.95   | 36.19  |

---



We used R<sup>100</sup> package BioGeoBEARS<sup>99, 101</sup> to compare biogeographical models and estimated ancestral range probabilities of *Homo* species or populations (Appendix 10). Using the same package, we also estimated the number of dispersal, vicariance and sympatry events with biogeographical stochastic mapping (BSM)<sup>102</sup>. Dispersal-Extinction-Cladogenesis<sup>98</sup> (DEC), Dispersal-Vicariance-Analysis<sup>103</sup> like (DIVALIKE) and Bayesian-Inference-of-Historical-Biogeography-for-Discrete-Areas<sup>96</sup> like (BAYAREALIKE) were used as the basic models. DEC model assigns probabilities to various biogeographic events<sup>98</sup>. Given the observed geographic distribution data of the OTUs of a phylogenetic tree and these probabilities of the biogeographic events, maximum likelihood is used as the criterion for estimating the parameters and ancestral states. Dispersal-vicariance analysis (DIVA)<sup>103</sup> method assigns the biogeographic events or processes of dispersal, extinction, duplication and vicariance deterministic costs according to their likelihood of occurrence. All the event-based methods (also cladistic biogeographic methods) must rely on the principle of parsimony for biogeographic inference. Bayesian-Inference-of-Historical-Biogeography-for-Discrete-Areas (BAYAREA), as its name indicates, is a method based on Bayesian technique<sup>96</sup>. The three models (DEC, DIVA and BAYAREA) were widely applied in various biogeographical researches<sup>99</sup>. Matzke<sup>99, 101</sup> developed the likelihood interpretations (DEC, DIVALIKE, and BAYAREALIKE) of the three models in the BioGeoBEARS package. This package can be used not only for probabilistic inference of the evolution of the geographic ranges on a phylogenetic tree as in the three models, but also for comparison of different models of range evolution. The available model that best fits the given geographical and phylogenetic data can be determined through the model comparison.

The DEC models “dispersal” and “extinction” as an anagenetic range-expansion process and an anagenetic range-contraction process. DEC assumes equal per-event weights for the sympatry, subset sympatry and vicariance during the cladogenesis<sup>98</sup>. DIVALIKE assumes the same anagenetic processes as the DEC model, but disallows subset sympatry and permits vicariance in the distribution of the descendants. BAYAREALIKE assumes no geographical range change during cladogenesis. The descendants inherit the ancestral distribution ranges. The three models cover all the generally recognized biogeographical processes, including sympatric speciation, vicariance, range expansion and range contraction.

When the founder-event speciation is considered and the  $j$  parameter is added to the three basic models, it creates three additional models: DEC+ $j$ , DIVALIKE+ $j$  and BAYAREALIKE+ $j$ . The free parameter  $j$  represents the relative per-event weight of the founder-event speciation/diversification during cladogenesis.

For the founder-event speciation/diversification, it describes a jump dispersal event that founds a new species or lineage, which occupies a new distribution area while its sister group remains in the ancestral distribution area<sup>104-106</sup>. This founder-event speciation, or jump dispersal speciation, is sometimes called speciation through long distance dispersal or allopatric mode II speciation<sup>104, 107-110</sup>. It usually involves a small number of individuals that dispersed to a new locality through a long dispersal distance and established a new isolated founder population. Here in our analysis, the founder-event is more relevant to diversification instead of speciation, because most of the terminal OTUs in our analyses are populations, not an isolated species. Before a species is actually evolved through the founder-event speciation mode, a founder isolated population must be established. In our analyses, all the terminal OTUs show distinct features and the tip-dating results suggest that they have a deeper division time.

To test the possibility of different dispersal routes, each of these six models was modified by adding the free parameter  $w$  and the dispersal probability (the dispersal rate for parameter  $d$ , and the dispersal weight for parameter  $j$ ) is multiplied by a manual dispersal multiplier matrix. Three manual dispersal multiplier matrix are used. The first manual dispersal multiplier matrix divides the distribution range of *Homo* into 3 areas: Africa, Asia, and Europe.

The rates among the 3 areas are set to be equal (S-Table 9). By using this manual dispersal multiplier, we assume that the dispersal probabilities among African, Asia and Europe are equal. No route is specifically more preferred by humans when they dispersed from one area to another area. The second and the third manual dispersal multiplier matrix divide the distribution range of *Homo* into 5 areas: Africa, Europe, West Asia, East Asia, South-Southeast Asia. The rates from West Asia to East Asia and South-Southeast Asia are set to values lower than 1 (S-Table 10, 11). For a southern dispersal route from Africa to Asia, the rates from Africa to West Asia, to South-Southeast Asia then to East Asia are gradually reduced from 0.8 to 0.4 (S-Table 10). Alternatively for a northern dispersal route from Africa to Asia, the rates from Africa to West Asia, to East Asia, then to South-Southeast Asia are gradually reduced from 0.8 to 0.4 (S-Table 11).

S-Table 9. Manual dispersal multipliers matrix assuming 3 distribution areas with equal dispersal rates among Africa, Europe and Asia

|        | Africa | Asia | Europe |
|--------|--------|------|--------|
| Africa | 1      | 0.8  | 0.8    |
| Asia   | 0.8    | 1    | 0.8    |
| Europe | 0.8    | 0.8  | 1      |

S-Table 10. Manual dispersal multipliers matrix assuming 5 distribution areas with a southern dispersal route from Africa to Asia

|           | Africa | E Asia | Europe | S-SE Asia | W Asia |
|-----------|--------|--------|--------|-----------|--------|
| Africa    | 1      | 0.4    | 0.6    | 0.6       | 0.8    |
| E Asia    | 0.4    | 1      | 0.6    | 0.8       | 0.6    |
| Europe    | 0.6    | 0.4    | 1      | 0.6       | 0.8    |
| S-SE Asia | 0.6    | 0.8    | 0.6    | 1         | 0.8    |
| W Asia    | 0.8    | 0.6    | 0.8    | 0.8       | 1      |

S-Table 11. Manual dispersal multipliers matrix assuming 5 distribution areas with a northern dispersal route from Africa to Asia

|           | Africa | E Asia | Europe | S-SE Asia | W Asia |
|-----------|--------|--------|--------|-----------|--------|
| Africa    | 1      | 0.6    | 0.6    | 0.4       | 0.8    |
| E Asia    | 0.6    | 1      | 0.6    | 0.8       | 0.8    |
| Europe    | 0.6    | 0.6    | 1      | 0.4       | 0.6    |
| S-SE Asia | 0.4    | 0.8    | 0.4    | 1         | 0.6    |
| W Asia    | 0.8    | 0.8    | 0.8    | 0.6       | 1      |

For each dispersal route hypothesis, we tested 6 models (DEC, DEC+ $j$ , DIVALIKE, DIVALIKE+ $j$ , BAYAREALIKE, BATAREALIKE+ $j$ ) and estimated 3 free parameters ( $d$  for the rate of range expansion,  $e$  for the rate of range contraction, and  $j$  for the per-event weight of founder-event speciation at cladogenesis). We used the Akaike information criterion (AIC)<sup>111</sup> to select the best fitting model. We also used the likelihood ratio test (LRT) to compare pairs of nested models, that is, DEC vs. DEC+ $j$ , DIVALIKE vs. DIVALIKE+ $j$ , BAYAREALIKE vs. BATAREALIKE+ $j$ . All the models with the  $j$  parameter show much lower AICs than others without the  $j$  parameter (S-Table 11-13). The results suggest that range expansion alone cannot sufficiently interpret the increase of distribution areas. Model DEC+ $j$  of each dispersal route hypothesis has the lowest AIC value compared with other models. The three basic models (without  $j$  parameter) all have much higher AIC than the best model (DEC+ $j$ ). Although the three basic models have AICs different to each other, the models with  $j$  parameters perform similarly well in terms of the AIC values and the  $\Delta$ AIC values among them are less than 1 (S-Table 12-14).

The model DEC+ $j$  of the first dispersal route hypothesis (3 distribution areas, equal dispersal rates among different areas) has the lowest AIC value (115.19) among the 18 models and is the best fitting biogeographical model (S-Table 12). The models DEC+ $j$  of the southern dispersal route and northern dispersal route have similar AIC values (S-Table 13, 14), with that of the southern dispersal route hypothesis being slightly better.

S-Table 12. Comparison of different biogeographical models under the equal dispersal rate hypothesis

| Models        | log-likelihoods | Number of parameters | d            | e            | j         | AIC      | $\Delta$ AIC |
|---------------|-----------------|----------------------|--------------|--------------|-----------|----------|--------------|
| DEC           | -93.92043       | 2                    | 3.250324e-04 | 1.000000e-12 | 0.000000  | 191.8409 | 76.6484      |
| DEC+J         | -54.59623       | 3                    | 1.000000e-12 | 1.000000e-12 | 0.2113595 | 115.1925 | 0            |
| DIVALIKE      | -92.69438       | 2                    | 4.760872e-04 | 1.000000e-12 | 0.000000  | 189.3888 | 74.1963      |
| DIVALIKE+J    | -54.66967       | 3                    | 1.000000e-12 | 1.000000e-12 | 0.2057641 | 115.3393 | 0.1468       |
| BAYAREALIKE   | -109.58300      | 2                    | 1.687909e-04 | 1.489092e-03 | 0.000000  | 223.1660 | 107.9735     |
| BAYAREALIKE+J | -54.82272       | 3                    | 1.000000e-07 | 1.000000e-07 | 0.1838015 | 115.6454 | 0.4529       |

S-Table 13. Comparison of different biogeographical models under the south route dispersal hypothesis

| Models        | log-likelihoods | Number of parameters | d            | e            | j         | AIC      | $\Delta$ AIC |
|---------------|-----------------|----------------------|--------------|--------------|-----------|----------|--------------|
| DEC           | -120.83285      | 2                    | 2.583563e-04 | 5.651608e-05 | 0.000000  | 245.6657 | 89.749       |
| DEC+J         | -74.95835       | 3                    | 1.000000e-12 | 1.000000e-12 | 0.1671559 | 155.9167 | 0            |
| DIVALIKE      | -117.27715      | 2                    | 3.480991e-04 | 1.000000e-12 | 0.000000  | 238.5543 | 82.6376      |
| DIVALIKE+J    | -75.17725       | 3                    | 1.000000e-12 | 1.000000e-12 | 0.1626270 | 156.3545 | 0.4378       |
| BAYAREALIKE   | -230.98269      | 2                    | 1.000000e-02 | 1.000000e-02 | 0.000000  | 465.9654 | 310.0487     |
| BAYAREALIKE+J | -230.98553      | 3                    | 1.000000e-02 | 1.000000e-02 | 0.0001000 | 467.9711 | 312.0544     |

S-Table 14. Comparison of different biogeographical models under the north route dispersal hypothesis

| Models        | log-likelihoods | Number of parameters | d            | e            | j         | AIC      | $\Delta$ AIC |
|---------------|-----------------|----------------------|--------------|--------------|-----------|----------|--------------|
| DEC           | -121.06451      | 2                    | 2.548388e-04 | 5.002505e-05 | 0.0000000 | 246.1290 | 89.4804      |
| DEC+J         | -75.32429       | 3                    | 1.000000e-12 | 1.000000e-12 | 0.1637598 | 156.6486 | 0            |
| DIVALIKE      | -117.48584      | 2                    | 3.434934e-04 | 1.000000e-12 | 0.0000000 | 238.9717 | 82.3231      |
| DIVALIKE+J    | -75.55497       | 3                    | 1.000000e-12 | 1.000000e-12 | 0.1593124 | 157.1099 | 0.4613       |
| BAYAREALIKE   | -231.43713      | 2                    | 1.000000e-02 | 1.000000e-02 | 0.0000000 | 466.8743 | 310.2257     |
| BAYAREALIKE+J | -231.44003      | 3                    | 1.000000e-02 | 1.000000e-02 | 0.0001000 | 468.8801 | 312.2315     |

BSM generates simulated biogeographical histories, including the times, ancestral ranges, and the geographical distribution of all the biogeographic events along the phylogenetic branches. We ran 1000 BSMs under the DEC+*j* 3 areas equal dispersal rate biogeographical model, and calculated the means and standard deviations of biogeographical events across the 1000 mapping processes. The ancestral range estimation in BioGeoBEARS shows the single most probable range and a pie chart of all the possible ranges at each internal node (Fig. 5).

Each of the 1000 BSMs has a certain number of narrow sympatry, subset sympatry, vicariance and founder-events (S-Fig. 24). Anagenetic dispersal events are totally absent. Subset sympatry and vicariance are also quite rare events. Narrow sympatry and founder-event are the most common events. Narrow sympatry shows 28-34 events per BSM realized history, and the founder-event shows 20-26 events per BSM realized history. Sympatric events account for 57.46% of the total biogeographical events, and the founder-events occupy 41.72% of the total biogeographical events (S-Table 15).

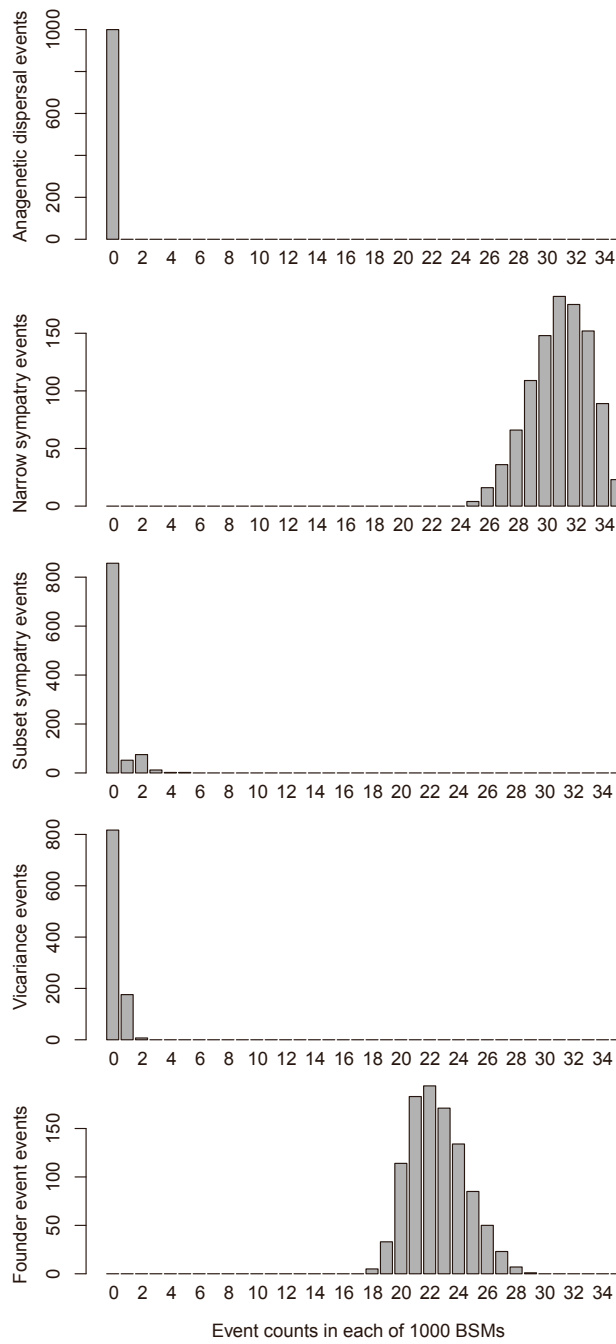

S-Figure 24. Distribution of event counts across 1000 biogeographical stochastic mappings (BSMs) generated under the DEC+j model. The maximum of the vertical axis is the 1000 BSMs.

S-Table 15. Summary of biogeographical stochastic mapping (BSM) counts for the *Homo* species using the DEC+*j* model under 3 distribution areas with equal dispersal rate hypothesis. Means, standard deviations and summation are calculated from 1000 BSMs.

| Mode                                                 | Type                                 | Means | SD   | Percentage |
|------------------------------------------------------|--------------------------------------|-------|------|------------|
| Sympatric diversifications                           | Narrow sympatry                      | 31.03 | 2.06 | 57.46%     |
|                                                      | Subset Sympatry                      | 0.26  | 0.69 | 0.48%      |
| Dispersal events                                     | Founder-event (cladogenic dispersal) | 22.53 | 1.97 | 41.72%     |
|                                                      | Range-switching dispersal            | 0     | 0    | 0.00       |
|                                                      | Range-expansion dispersal            | 0     | 0    | 0.00       |
|                                                      | Range-contraction                    | 0     | 0    | 0.00       |
| Vicariances                                          | Vicariance                           | 0.19  | 0.41 | 0.35%      |
| All dispersals (anagenetic and cladogenic dispersal) |                                      | 22.53 | 1.97 | 42.20%     |
| Anagenetic dispersals (range-switching or expansion) |                                      | 0     | 0    | 0.00       |
| All anagenetic events                                |                                      | 0     | 0    | 0.00       |
| All cladogenic events                                |                                      | 54    | 0    | 100.00%    |
| Total biogeographic events                           |                                      | 54    | 0    | 100.00%    |

Because all the OTUs are at the population level from a single locality, it is reasonable to see that no range expansion or range contraction event is detected from the BSM simulations. For the founder-events, or the jump dispersal events, we found that the dispersal movements between areas are asymmetrical (S-Table 16). Africa is the source of dispersal, which represents the ancestral state. In total, 39.70% of all the dispersals are from Africa, much greater than the dispersals to Africa (21.98%). Europe keeps a kind of balance. The continent originates 36.46% dispersal events, and receives 36.06% dispersals from other continents. Asia is obviously a sink for the evolution of *Homo*. Totally 41.96% dispersal events are from other continents to Asia, and only 23.85% dispersals are from Asia to other continents.

S-Table 16. Mean (SD) of the number of the founder-events (jump dispersal events) in the evolutionary history of the genus *Homo*, estimated with biogeographical stochastic mappings (BSMs). Counts of dispersal events were averaged across the 1000 BSMs. The ancestral state is referred to the place where a lineage dispersed from (the rows), and the descendant state is referred to the place where a lineage dispersed to (the columns).

|             | To Africa   | To Asia     | To Europe   | Total | Percentage |
|-------------|-------------|-------------|-------------|-------|------------|
| From Africa | 0           | 4.24 (1.13) | 4.70 (1.37) | 8.94  | 39.70%     |
| From Asia   | 1.95 (1.58) | 0           | 3.42 (1.67) | 5.37  | 23.85%     |
| From Europe | 3.00 (1.82) | 5.21 (1.47) | 0           | 8.21  | 36.46%     |
| Total       | 4.95        | 9.45        | 8.12        | 22.52 |            |
| Percentage  | 21.98%      | 41.96%      | 36.06%      |       |            |

## References

1. Vialet, A., Guipert, G., Jianing, H., Xiaobo, F., Zune, L., Youping, W., Tianyuan, L., de Lumley, M.-A. and de Lumley, H. *Homo erectus* from the Yunxian and Nankin Chinese sites: anthropological insights using 3D virtual imaging techniques. *Comptes Rendus Palevol* **9**(6), 331-339 (2010). doi:10.1016/j.crpv.2010.07.017
2. Brown, P., Sutikna, T., Morwood, M., Soejono, R., Jatmiko, Saptomo, E. and Due, R. A new small-bodied hominin from the Late Pleistocene of Flores, Indonesia. *Nature* **431**, 1055 - 1061doi:10.1038/nature02999 (2004).
3. Détroit, F., Mijares, A.S., Corny, J., Daver, G., Zanolli, C., Dizon, E., Robles, E., Grün, R. and Piper, P.J. A new species of *Homo* from the Late Pleistocene of the Philippines. *Nature* **568**(7751), 181-186 (2019). doi:10.1038/s41586-019-1067-9
4. Kaifu, Y., Kono, R.T., Sutikna, T., Saptomo, E.W., Jatmiko, Awe, R.D. and Baba, H. Descriptions of the dental remains of *Homo floresiensis*. *Anthropol. Sci.* **123**(2), 129-145 (2015). doi:10.1537/ase.150501
5. Kaifu, Y., Kono, R.T., Sutikna, T., Saptomo, E.W., Jatmiko and Due Awe, R. Unique Dental Morphology of *Homo floresiensis* and Its Evolutionary Implications. *PLOS ONE* **10**(11), e0141614 (2015). doi:10.1371/journal.pone.0141614
6. Larson, S., Jungers, W., Tocheri, M., Orr, C., Morwood, M., Sutikna, T., Awe, R. and Djubiantono, T. Descriptions of the upper limb skeleton of *Homo floresiensis*. *J. Hum. Evol.* **57**(5), 555 - 570doi:10.1016/j.jhevol.2008.06.007 (2009).
7. Jungers, W., Harcourt-Smith, W., Wunderlich, R., Tocheri, M., Larson, S., Sutikna, T., Due, R. and Morwood, M. The foot of *Homo floresiensis*. *Nature* **459**, 81-84doi:10.1038/nature07989 (2009).
8. Jungers, W.L., Larson, S.G., Harcourt-Smith, W., Morwood, M.J., Sutikna, T., Due Awe, R. and Djubiantono, T. Descriptions of the lower limb skeleton of *Homo floresiensis*. *J. Hum. Evol.* **57**(5), 538-554 (2009). doi:10.1016/j.jhevol.2008.08.014
9. Argue, D., Groves, C.P., Lee, M.S.Y. and Jungers, W.L. The affinities of *Homo floresiensis* based on phylogenetic analyses of cranial, dental, and postcranial characters. *J. Hum. Evol.* **107**, 107-133 (2017). doi:10.1016/j.jhevol.2017.02.006
10. Moreno, D., Falguères, C., Pérez-González, A., Voinchet, P., Ghaleb, B., Despriée, J., Bahain, J.-J., Sala, R., Carbonell, E., Bermúdez de Castro, J.M. and Arsuaga, J.L. New radiometric dates on the lowest stratigraphical section (TD1 to TD6) of Gran Dolina site (Atapuerca, Spain). *Quaternary Geochronology* **30**, 535-540 (2015). doi:10.1016/j.quageo.2015.05.007
11. Bermúdez de Castro, J.M., Arsuaga, J.L., Carbonell, E., Rosas, A., Martínez, I. and Mosquera, M. A hominid from the lower Pleistocene of Atapuerca, Spain: possible ancestor to Neandertals and modern humans. *Science* **276**(5317), 1392-1395 (1997). doi:10.1126/science.276.5317.1392
12. Sonakia, A. and de Lumley, H. Narmada *Homo erectus* – a possible ancestor of the modern Indian. *Comptes Rendus Palevol* **5**(1), 353-357 (2006). doi:10.1016/j.crpv.2005.10.002
13. Kennedy, K.A.R., Sonakia, A., Chiment, J. and Verma, K.K. Is the Narmada hominid an Indian *Homo erectus*? *Am. J. Phys. Anthropol.* **86**(4), 475-496 (1991). doi:10.1002/ajpa.1330860404
14. Klein, R.G., *The human career. Human biology and cultural origins. Third edition.*, (The University of Chicago, Chicago and London, 2009), pp. 989.
15. Bräuer, G., Groden, C., Gröning, F., Kroll, A., Kupczik, K., Mbua, E., Pommert, A. and Schiemann, T. Virtual study of the endocranial morphology of the matrix-filled cranium from Eliye Springs, Kenya. *Anat.*

- Rec.* **276A**(2), 113-133 (2004). doi:10.1002/ar.a.90122
16. Ash, J. and Gallup, G.G. Paleoclimatic variation and brain expansion during human evolution. *Human Nature* **18**(2), 109-124 (2007). doi:10.1007/s12110-007-9015-z
  17. Bailey, D.H. and Geary, D.C. Hominid brain evolution. *Human Nature* **20**(1), 67-79 (2009). doi:10.1007/s12110-008-9054-0
  18. Hublin, J.-J., Ben-Ncer, A., Bailey, S.E., Freidline, S.E., Neubauer, S., Skinner, M.M., Bergmann, I., Le Cabec, A., Benazzi, S., Harvati, K. and Gunz, P. New fossils from Jebel Irhoud, Morocco and the pan-African origin of *Homo sapiens*. *Nature* **546**, 289 (2017). doi:10.1038/nature22336
  19. Neubauer, S., Hublin, J.-J. and Gunz, P. The evolution of modern human brain shape. *Science Advances* **4**(1), eaao5961 (2018). doi:10.1126/sciadv.aao5961
  20. Grün, R., Brink, J.S., Spooner, N.A., Taylor, L., Stringer, C.B., Franciscus, R.G. and Murray, A.S. Direct dating of Florisbad hominid. *Nature* **382**(6591), 500-501 (1996). doi:10.1038/382500a0
  21. De Miguel, C. and Henneberg, M. Variation in hominid brain size: How much is due to method? *HOMO* **52**(1), 3-58 (2001). doi:10.1078/0018-442X-00019
  22. Holloway, R.L., Broadfield, D.C. and Yuan, M.S., *The human fossil record: brain endocasts*. (John Wiley & Sons, Inc., New York, 2004), pp. 315.
  23. Rougier, H., Milota, Ş., Rodrigo, R., Gherase, M., Sarcină, L., Moldovan, O., Zilhão, J., Constantin, S., Franciscus, R.G., Zollikofer, C.P.E., Ponce de León, M. and Trinkaus, E. Peștera cu Oase 2 and the cranial morphology of early modern Europeans. *Proc. Natl. Acad. Sci. U.S.A.* **104**(4), 1165-1170 (2007). doi:10.1073/pnas.0610538104
  24. Liu, W., Wu, X., Xing, S. and Zhang, Y., *Human fossils in China*. (Science Press, Beijing, 2014), pp. 378.
  25. Poza-Rey, E.M., Gómez-Robles, A. and Arsuaga, J.L. Brain size and organization in the Middle Pleistocene hominins from Sima de los Huesos. Inferences from endocranial variation. *J. Hum. Evol.* **129**, 67-90 (2019). doi:10.1016/j.jhevol.2019.01.006
  26. Arsuaga, J.L., Martínez, I., Arnold, L.J., Aranburu, A., Gracia-Téllez, A., Sharp, W.D., Quam, R.M., Falguères, C., Pantoja-Pérez, A., Bischoff, J., Poza-Rey, E., Parés, J.M., Carretero, J.M., Demuro, M., Lorenzo, C., Sala, N., Martínón-Torres, M., García, N., Alcázar de Velasco, A., Cuenca-Bescós, G., et al. Neandertal roots: Cranial and chronological evidence from Sima de los Huesos. *Science* **344**(6190), 1358 (2014). doi:10.1126/science.1253958
  27. Hublin, J.-J., Talamo, S., Julien, M., David, F., Connet, N., Bodu, P., Vandermeersch, B. and Richards, M.P. Radiocarbon dates from the Grotte du Renne and Saint-Césaire support a Neandertal origin for the Châtelperronian. *Proc. Natl. Acad. Sci. U.S.A.* **109**(46), 18743 (2012). doi:10.1073/pnas.1212924109
  28. Chen, F., Welker, F., Shen, C.-C., Bailey, S.E., Bergmann, I., Davis, S., Xia, H., Wang, H., Fischer, R., Freidline, S.E., Yu, T.-L., Skinner, M.M., Stelzer, S., Dong, G., Fu, Q., Dong, G., Wang, J., Zhang, D. and Hublin, J.-J. A late Middle Pleistocene Denisovan mandible from the Tibetan Plateau. *Nature* **569**(7756), 409-412 (2019). doi:10.1038/s41586-019-1139-x
  29. Sun, X., Yi, S., Lu, H. and Zhang, W. TT-OSL and post-IR IRSL dating of the Dali Man site in central China. *Quat. Int.* **434**, 99-106 (2017). doi:10.1016/j.quaint.2015.05.027
  30. Wu, X. and Athreya, S. A description of the geological context, discrete traits, and linear morphometrics of the middle Pleistocene hominin from Dali, Shaanxi Province, China. *Am. J. Phys. Anthropol.* **150**, 141-157 (2013).



31. Wu, X.-J., Pei, S.-W., Cai, Y.-J., Tong, H.-W., Li, Q., Dong, Z., Sheng, J.-C., Jin, Z.-T., Ma, D.-D., Xing, S., Li, X.-L., Cheng, X., Cheng, H., de la Torre, I., Edwards, R.L., Gong, X.-C., An, Z.-S., Trinkaus, E. and Liu, W. Archaic human remains from Hualongdong, China, and Middle Pleistocene human continuity and variation. *Proc. Natl. Acad. Sci. U.S.A.* **116**(20), 9820 (2019). doi:10.1073/pnas.1902396116
32. Shen, G., Tu, H., Xiao, D., Qiu, L., Feng, Y.-x. and Zhao, J.-x. Age of Maba hominin site in Southern China: Evidence from U-series dating of Southern Branch Cave. *Quaternary Geochronology* **23**, 56-62 (2014). doi:10.1016/j.quageo.2014.06.004
33. Wu, X.-j. and Bruner, E. The endocranial anatomy of Maba 1. *Am. J. Phys. Anthropol.* **160**(4), 633-643 (2016). doi:10.1002/ajpa.22974
34. Li, Z.-Y., Wu, X.-J., Zhou, L.-P., Liu, W., Gao, X., Nian, X.-M. and Trinkaus, E. Late Pleistocene archaic human crania from Xuchang, China. *Science* **355**(6328), 969 (2017).
35. Wagner, G.A., Krbetschek, M., Degering, D., Bahain, J.-J., Shao, Q., Falguères, C., Voinchet, P., Dolo, J.-M., Garcia, T. and Rightmire, G.P. Radiometric dating of the type-site for *Homo heidelbergensis* at Mauer, Germany. *Proc. Natl. Acad. Sci. U.S.A.* **107**(46), 19726 (2010). doi:10.1073/pnas.1012722107
36. Falguères, C., Shao, Q., Han, F., Bahain, J.J., Richard, M., Perrenoud, C., Moigne, A.M. and Lumley de, H. New ESR and U-series dating at Caune de l'Arago, France: A key-site for European Middle Pleistocene. *Quaternary Geochronology* **30**, 547-553 (2015). doi:10.1016/j.quageo.2015.02.006
37. Grün, R., Pike, A., McDermott, F., Eggins, S., Mortimer, G., Aubert, M., Kinsley, L., Joannes-Boyau, R., Rumsey, M., Denys, C., Brink, J., Clark, T. and Stringer, C. Dating the skull from Broken Hill, Zambia, and its position in human evolution. *Nature*, (2020). doi:10.1038/s41586-020-2165-4
38. Conroy, G.C., Weber, G.W., Seidler, H., Recheis, W., Zur Nedden, D. and Mariam, J.H. Endocranial capacity of the Bodo cranium determined from three-dimensional computed tomography. *Am. J. Phys. Anthropol.* **113**(1), 111-118 (2000). doi:10.1002/1096-8644(200009)113:1<111::AID-AJPA10>3.0.CO;2-X
39. Chen, T.-M. and Zhou, L.-P. Dating of the Peking Man site: a comparison between existing chronology and the <sup>26</sup>Al/<sup>10</sup>Be burial ages. *Acta Anthropol. Sin.* **28**(3), 285-291 (2009).
40. Cui, Y. and Wu, X. A geometric morphometric study of a Middle Pleistocene cranium from Hexian, China. *J. Hum. Evol.* **88**(Supplement C), 54-69 (2015). doi:10.1016/j.jhevol.2015.08.001
41. Rizal, Y., Westaway, K.E., Zaim, Y., van den Bergh, G.D., Bettis, E.A., Morwood, M.J., Huffman, O.F., Grün, R., Joannes-Boyau, R., Bailey, R.M., Westaway, M.C., Kurniawan, I., Moore, M.W., Storey, M., Aziz, F., Zhao, J.-x., Aswan, Sipola, M.E., Larick, R., Zonneveld, J.-P., et al. Last appearance of *Homo erectus* at Ngandong, Java, 117,000–108,000 years ago. *Nature*, (2019). doi:10.1038/s41586-019-1863-2
42. Lordkipanidze, D., Ponce de León, M.S., Margvelashvili, A., Rak, Y., Rightmire, G.P., Vekua, A. and Zollikofer, C.P.E. A complete skull from Dmanisi, Georgia, and the evolutionary biology of early *Homo*. *Science* **342**(6156), 326 (2013).
43. Neuville, R. and Ruhlmann, A. L'âge de l'Homme fossile de Rabat. *Bull. Mem. Soc. Anthropol. Paris* **IX**<sup>o</sup> **Série. Tome 3**, 74-88 (1942).
44. Oujaa, A., Arnaud, J., Bardey-Vaillant, M. and Grimaud-Hervé, D. The fossil human from Rabat-Kébibat (Morocco): comparative study of the cranial and mandibular fragments. *African Archaeological Review* **34**(4), 511-523 (2017). doi:10.1007/s10437-017-9278-7
45. Schwartz, J.H. and Tattersall, I. Significance of some previously unrecognized apomorphies in the nasal region of *Homo neanderthalensis*. *Proc. Natl. Acad. Sci. U.S.A.* **93**(20), 10852 (1996).

- doi:10.1073/pnas.93.20.10852
46. Schwartz, J.H. and Tattersall, I. Toward distinguishing *Homo neanderthalensis* from *Homo sapiens*, and vice versa. *Anthropologie (Brno)* **34**(1-2), 79-88 (1996).
  47. Schwartz, J.H. and Tattersall, I. The human chin revisited: what is it and who has it? *J. Hum. Evol.* **38**(3), 367-409 (2000). doi:10.1006/jhev.1999.0339
  48. Rightmire, G.P., Lordkipanidze, D. and Vekua, A. Anatomical descriptions, comparative studies and evolutionary significance of the hominin skulls from Dmanisi, Republic of Georgia. *J. Hum. Evol.* **50**(2), 115-141 (2006). doi:10.1016/j.jhevol.2005.07.009
  49. Rightmire, P.G. The human cranium from Bodo, Ethiopia: evidence for speciation in the Middle Pleistocene? *J. Hum. Evol.* **31**(1), 21-39 (1996). doi:10.1006/jhev.1996.0046
  50. Martínez, I. and Arsuaga, J.L. The temporal bones from Sima de los Huesos Middle Pleistocene site (Sierra de Atapuerca, Spain). A phylogenetic approach. *J. Hum. Evol.* **33**(2), 283-318 (1997). doi:10.1006/jhev.1997.0155
  51. Martin, R. and Saller, K., *Lehrbuch der Anthropologie, in systematischer Darstellung. Lieferung 3. Systematische Anthropologie.* (Gustav Fischer Verlag, Stuttgart, 1956).
  52. Howells, W.W. Cranial variation in man. A study by multivariate analysis of patterns of differences among recent human populations. *Papers of the Peabody Museum of Archaeology and Ethnology* **67**, 1-190 (1973).
  53. Turner, C.G., II, Nichol, C.R. and Scott, G.R., in *Advances in dental anthropology*, Kelley, M.A., Larsen, C.S., Eds. (Wiley-Liss, Inc., New York, 1991), pp. 13-31.
  54. Edgar, H.J.H., *Dental morphology for anthropology. An illustrated manual.* (Taylor & Francis, New York and London, 2017), pp. 184.
  55. Scott, G.R. and Irish, J.D., *Human tooth crown and root morphology. The Arizona State University dental anthropology System.* (Cambridge University Press, Cambridge, 2017), pp. 331.
  56. Irish, J.D., Guatelli-Steinberg, D., Legge, S.S., de Ruiter, D.J. and Berger, L.R. Dental morphology and the phylogenetic “place” of *Australopithecus sediba*. *Science* **340**(6129), (2013). doi:10.1126/science.1233062
  57. O’Leary, M.A. and Kaufman, S. MorphoBank: phylophenomics in the “cloud”. *Cladistics* **27**(5), 529-537 (2011). doi:10.1111/j.1096-0031.2011.00355.x
  58. O’Leary, M.A., Bloch, J.I., Flynn, J.J., Gaudin, T.J., Giallombardo, A., Giannini, N.P., Goldberg, S.L., Kraatz, B.P., Luo, Z.-X., Meng, J., Ni, X., Novacek, M.J., Perini, F.A., Randall, Z.S., Rougier, G.W., Sargis, E.J., Silcox, M.T., Simmons, N.B., Spaulding, M., Velazco, P.M., et al. The Placental Mammal Ancestor and the Post-K-Pg Radiation of Placentals. *Science* **339**(6120), 662-667 (2013). doi:10.1126/science.1229237
  59. Sawyer, S., Renaud, G., Viola, B., Hublin, J.-J., Gansauge, M.-T., Shunkov, M.V., Derevianko, A.P., Prüfer, K., Kelso, J. and Pääbo, S. Nuclear and mitochondrial DNA sequences from two Denisovan individuals. *Proc. Natl. Acad. Sci. U.S.A.* **112**(51), 15696 (2015). doi:10.1073/pnas.1519905112
  60. Zubova, A.V., Chikisheva, T.A. and Shunkov, M.V. The morphology of permanent molars from the Paleolithic layers of Denisova Cave. *Archaeology, Ethnology & Anthropology of Eurasia* **45**(1), 121-134 (2017). doi:10.17746/1563-0110.2017.45.1.121-134
  61. Athreya, S. and Wu, X. A multivariate assessment of the Dali hominin cranium from China: Morphological affinities and implications for Pleistocene evolution in East Asia. *Am. J. Phys. Anthropol.* **164**(4), 679-701

- (2017). doi:10.1002/ajpa.23305
62. Woo, R. and Peng, R. Fossil human skull of early Paleolithic stage found at Mapa, Shaoyuan, Kwangtung Province. *Vertebrata Palasiatica* **3**, 176-182 (1959).
  63. Goloboff, P.A., Farris, J.S. and Nixon, K.C. TNT, a free program for phylogenetic analysis. *Cladistics* **24**, 774-786 (2008).
  64. Reich, D., Green, R.E., Kircher, M., Krause, J., Patterson, N., Durand, E.Y., Viola, B., Briggs, A.W., Stenzel, U., Johnson, P.L.F., Maricic, T., Good, J.M., Marques-Bonet, T., Alkan, C., Fu, Q., Mallick, S., Li, H., Meyer, M., Eichler, E.E., Stoneking, M., et al. Genetic history of an archaic hominin group from Denisova Cave in Siberia. *Nature* **468**(7327), 1053-1060 (2010). doi:10.1038/nature09710
  65. Prüfer, K., Racimo, F., Patterson, N., Jay, F., Sankararaman, S., Sawyer, S., Heinze, A., Renaud, G., Sudmant, P.H., de Filippo, C., Li, H., Mallick, S., Dannemann, M., Fu, Q., Kircher, M., Kuhlwilm, M., Lachmann, M., Meyer, M., Ongyerth, M., Siebauer, M., et al. The complete genome sequence of a Neanderthal from the Altai Mountains. *Nature* **505**(7481), 43-49 (2014). doi:10.1038/nature12886
  66. Welker, F., Ramos-Madrugal, J., Gutenbrunner, P., Mackie, M., Tiwary, S., Rakownikow Jersie-Christensen, R., Chiva, C., Dickinson, M.R., Kuhlwilm, M., de Manuel, M., Gelabert, P., Martínón-Torres, M., Margvelashvili, A., Arsuaga, J.L., Carbonell, E., Marques-Bonet, T., Penkman, K., Sabidó, E., Cox, J., Olsen, J.V., et al. The dental proteome of *Homo antecessor*. *Nature* **580**(7802), 235-238 (2020). doi:10.1038/s41586-020-2153-8
  67. Bremer, K. Branch support and tree stability. *Cladistics* **10**(3), 295-304 (1994).
  68. Ronquist, F., Klopfstein, S., Vilhelmsen, L., Schulmeister, S., Murray, D.L. and Rasnitsyn, A.P. A total-evidence approach to dating with fossils, applied to the early radiation of the Hymenoptera. *Systematic Biology* **61**(6), 973-999PMC3478566 (2012). doi:10.1093/sysbio/sys058
  69. Gavryushkina, A., Heath, T.A., Ksepka, D.T., Stadler, T., Welch, D. and Drummond, A.J. Bayesian total-evidence dating reveals the recent crown radiation of penguins. *Systematic Biology* **66**(1), 57-73 (2017). doi:10.1093/sysbio/syw060
  70. Zhang, C., Stadler, T., Klopfstein, S., Heath, T.A. and Ronquist, F. Total-evidence dating under the fossilized birth–death process. *Systematic Biology* **65**(2), 228-249PMC4748749 (2016). doi:10.1093/sysbio/syv080
  71. Zhang, C. and Wang, M. Bayesian tip dating reveals heterogeneous morphological clocks in Mesozoic birds. *Royal Society Open Science* **6**(7), 182062 doi:10.1098/rsos.182062
  72. Ronquist, F., Teslenko, M., van der Mark, P., Ayres, D.L., Darling, A., Höhna, S., Larget, B., Liu, L., Suchard, M.A. and Huelsenbeck, J.P. MrBayes 3.2: efficient Bayesian phylogenetic inference and model choice across a large model space. *Systematic Biology* **61**(3), 539-542 (2012). doi:10.1093/sysbio/sys029
  73. Lewis, P.O. A likelihood approach to estimating phylogeny from discrete morphological character data. *Systematic Biology* **50**(6), 913-925 (2001).
  74. Yang, Z. Maximum likelihood phylogenetic estimation from DNA sequences with variable rates over sites: Approximate methods. *Journal of Molecular Evolution* **39**(3), 306-314 (1994). doi:10.1007/BF00160154
  75. Höhna, S., Landis, M.J., Heath, T.A., Boussau, B., Lartillot, N., Moore, B.R., Huelsenbeck, J.P. and Ronquist, F. RevBayes: Bayesian phylogenetic inference using graphical models and an interactive model-specification language. *Systematic biology* **65**(4), 726-73627235697 (2016). doi:10.1093/sysbio/syw021
  76. Höhna, S., Landis, M.J. and Heath, T.A. Phylogenetic inference using RevBayes. *Current Protocols in*

- Bioinformatics* **57**(1), 6.16.11-16.16.34 (2017). doi:10.1002/cpbi.22
77. Stadler, T. Sampling-through-time in birth–death trees. *Journal of Theoretical Biology* **267**(3), 396-404 (2010). doi:10.1016/j.jtbi.2010.09.010
  78. Heath, T.A., Huelsenbeck, J.P. and Stadler, T. The fossilized birth–death process for coherent calibration of divergence-time estimates. *Proc. Natl. Acad. Sci. U.S.A.* **111**(29), E2957 (2014). doi:10.1073/pnas.1319091111
  79. Gavryushkina, A., Welch, D., Stadler, T. and Drummond, A.J. Bayesian inference of sampled ancestor trees for epidemiology and fossil calibration. *PLoS Comput Biol* **10**(12), e1003919-e100391925474353 (2014). doi:10.1371/journal.pcbi.1003919
  80. Alemseged, Z., Wynn, J.G., Geraads, D., Reed, D., Andrew Barr, W., Bobe, R., McPherron, S.P., Deino, A., Alene, M., J. Sier, M., Roman, D. and Mohan, J. Fossils from Mille-Logya, Afar, Ethiopia, elucidate the link between Pliocene environmental changes and *Homo* origins. *Nature Communications* **11**(1), 2480 (2020). doi:10.1038/s41467-020-16060-8
  81. Robinson, J.R., Rowan, J., Campisano, C.J., Wynn, J.G. and Reed, K.E. Late Pliocene environmental change during the transition from *Australopithecus* to *Homo*. *Nature Ecology & Evolution* **1**(6), 0159 (2017). doi:10.1038/s41559-017-0159
  82. DiMaggio, E.N., Campisano, C.J., Rowan, J., Dupont-Nivet, G., Deino, A.L., Bibi, F., Lewis, M.E., Souron, A., Garello, D., Werdelin, L., Reed, K.E. and Arrowsmith, J.R. Late Pliocene fossiliferous sedimentary record and the environmental context of early *Homo* from Afar, Ethiopia. *Science* **347**(6228), 1355 (2015). doi:10.1126/science.aaa1415
  83. Villmoare, B., Kimbel, W.H., Seyoum, C., Campisano, C.J., DiMaggio, E.N., Rowan, J., Braun, D.R., Arrowsmith, J.R. and Reed, K.E. Early *Homo* at 2.8 Ma from Ledi-Geraru, Afar, Ethiopia. *Science* **347**(6228), 1352-1355 (2015).
  84. Lepage, T., Bryant, D., Philippe, H. and Lartillot, N. A general comparison of relaxed molecular clock models. *Molecular Biology and Evolution* **24**(12), 2669-2680 (2007). doi:10.1093/molbev/msm193
  85. Geyer, C.J. Practical Markov Chain Monte Carlo. *Statist. Sci.* **7**(4), 473-483 (1992). doi:10.1214/ss/1177011137
  86. Ronquist, F., Lartillot, N. and Phillips, M.J. Closing the gap between rocks and clocks using total-evidence dating. *Phil. Trans. R. Soc. B* **371**, 20150136 (2016). doi:10.1098/rstb.2015.0136
  87. Parins-Fukuchi, C. Use of continuous traits can improve morphological phylogenetics. *Systematic Biology* **67**(2), 328-339 (2017). doi:10.1093/sysbio/syx072
  88. Álvarez-Carretero, S., Goswami, A., Yang, Z. and Dos Reis, M. Bayesian estimation of species divergence times using correlated quantitative characters. *Systematic Biology* **68**(6), 967-986 (2019). doi:10.1093/sysbio/syz015
  89. Posth, C., Wißing, C., Kitagawa, K., Pagani, L., van Holstein, L., Racimo, F., Wehrberger, K., Conard, N.J., Kind, C.J., Bocherens, H. and Krause, J. Deeply divergent archaic mitochondrial genome provides lower time boundary for African gene flow into Neanderthals. *Nature Communications* **8**(1), 16046 (2017). doi:10.1038/ncomms16046
  90. dos Reis, M. and Yang, Z. The unbearable uncertainty of Bayesian divergence time estimation. *Journal of Systematics and Evolution* **51**, 30-43 (2013).
  91. Zhu, T., dos Reis, M. and Yang, Z. Characterization of the uncertainty of divergence time estimation under

- relaxed molecular clock models using multiple loci. *Systematic Biology* **64**, 267–280 (2015).
92. Drummond, A.J., Rambaut, A., Shapiro, B. and Pybus, O.G. Bayesian Coalescent Inference of Past Population Dynamics from Molecular Sequences. *Molecular Biology and Evolution* **22**(5), 1185-1192 (2005). doi:10.1093/molbev/msi103
  93. Sanmartín, I. Historical biogeography: evolution in time and space. *Evo Edu Outreach* **5**, 555-568 (2012). doi:10.1007/s12052-012-0421-2
  94. Myers, A.A. and Giller, P., Eds., *Analytical Biogeography. An Integrated Approach to the Study of Animal and Plant Distributions*, (Springer Netherlands, London and New York, 1988), pp. 1-578.
  95. Morrone, J.J. and Crisci, J.V. Historical biogeography: introduction to methods. *Annual Review of Ecology and Systematics* **26**, 373-401 (1995).
  96. Landis, M.J., Matzke, N.J., Moore, B.R. and Huelsenbeck, J.P. Bayesian analysis of biogeography when the number of areas is large. *Systematic Biology* **62**(6), 789-804 (2013). doi:10.1093/sysbio/syt040
  97. Ronquist, F. and Sanmartín, I. Phylogenetic Methods in Biogeography. *Annual Review of Ecology, Evolution, and Systematics* **42**(1), 441-464 (2011). doi:10.1146/annurev-ecolsys-102209-144710
  98. Ree, R.H. and Smith, S.A. Maximum likelihood inference of geographic range evolution by dispersal, local extinction, and cladogenesis. *Systematic Biology* **57**(1), 4-14 (2008). doi:10.1080/10635150701883881
  99. Matzke, N.J. Probabilistic historical biogeography: new models for founder-event speciation, imperfect detection, and fossils allow improved accuracy and model-testing. *Frontiers of Biogeography* **5**(4), 242-248 (2013). doi:10.21425/F5FBG19694
  100. R Core Team. R: a language and environment for statistical computing. (2018).
  101. Matzke, N.J. BioGeoBEARS: bioGeography with Bayesian (and likelihood) evolutionary analysis with R scripts. (2018). doi:10.5281/zenodo.1478250
  102. Matzke, N.J. Stochastic mapping under biogeographical models. (2015).
  103. Ronquist, F. Dispersal-vicariance analysis: a new approach to the quantification of historical biogeography. *Systematic Biology* **46**(1), 195-203 (1997). doi:10.1093/sysbio/46.1.195
  104. Matzke, N.J. Model selection in historical biogeography reveals that founder-event speciation is a crucial process in Island Clades. *Systematic Biology* **63**(6), 951-970 (2014). doi:10.1093/sysbio/syu056
  105. Soto-Trejo, F., Matzke, N.J., Schilling, E.E., Massana, K.A., Oyama, K., Lira, R. and Dávila, P. Historical biogeography of Florestina (Asteraceae: Bahieae) of dry environments in Mexico: evaluating models and uncertainty in low-diversity clades. *Botanical Journal of the Linnean Society* **185**(4), 497-510 (2017). doi:10.1093/botlinnean/box069
  106. Dupin, J., Matzke, N.J., Särkinen, T., Knapp, S., Olmstead, R.G., Bohs, L. and Smith, S.D. Bayesian estimation of the global biogeographical history of the Solanaceae. *Journal of Biogeography* **44**(4), 887-899 (2017). doi:10.1111/jbi.12898
  107. Maguire, K.C. and Stigall, A.L. Paleobiogeography of Miocene Equinae of North America: a phylogenetic biogeographic analysis of the relative roles of climate, vicariance, and dispersal. *Palaeogeography, Palaeoclimatology, Palaeoecology* **267**(3), 175-184 (2008). doi:10.1016/j.palaeo.2008.06.014
  108. Templeton, A.R. The reality and importance of founder speciation in evolution. *BioEssays* **30**(5), 470-479 (2008). doi:10.1002/bies.20745
  109. Lomolino, M.V., Riddle, B.R., Whittaker, R.J. and Brown, J.H., *Biogeography. Fourth edition*. (Sinauer Associates, Sunderland (Massachusetts), 2010), pp. 878.

110. Heads, M.J., *Molecular panbiogeography of the tropics*. (University of California Press, Berkeley, 2012), pp. 576.
111. Burnham, K.P. and Anderson, D.R., *Model selection and multimodel Inference: a practical information-theoretic Approach. Second edition*. (Springer, New York, 2002), pp. 488.

## **Appendix**

### **Appendix 1. Continuous phenomic characters used for phylogenetic analysis**



0. Cranial capacity. [In cm<sup>3</sup>, cc, ml]
1. M1. GOL. g-op. Maximum cranial length.
2. M1d. NOL. n-op. Nasio-occipital length.
3. M2. Glabella-inion length.
4. Glabella-sphenobasion length.
5. Glabella-bregma chord. g-b chord.
6. g-b/g-op. Glabella-bregma chord index. [Glabella-bregma/glabella-opisthocranion]
7. Length of basal temporal.
8. BTL/g-op. Basal temporal length index.
9. Entire temporal bone length. [Sum of the temporal squama length and parietal notch length]
10. ETL/g-op. Entire temporal bone length index.
11. M5. BNL. Basion-nasion length.
12. M5(1). Nasion-opisthion length.
13. M6. ba-sphba. Basilar length. [Straight distance of the basion (ba) from the sphenobasion (sphba)]
14. M7. FOL. Foramen magnum length (ba-o).
15. M8. XCB. Maximum cranial breadth.
16. M8c. Squama suture breadth.
17. Maximum cranial breadth at supramastoid crest. Cranial vault.
18. Maximum biparietal breadth (Rightmire et al., 2006). Cranial vault. BPB. [Taken as a chord. -- Rightmire et al., 2006]
19. Ratio. Maximum biparietal breadth / maximum bimastoid breadth. [Taken inferior to the supramastoid crest]
20. M9. ft-ft. Least frontal breadth. Frontal.
21. Postorbital constriction index. M9/M44.
22. M10. XFB. Maximum frontal breadth. Frontal.
23. M10b. STB. Bistephanic breadth (st-st).
24. M11. AUB. Biauricular breadth.
25. M11b. Biradicular breadth.
26. M12. ASB. Biasterion breadth (ast-ast). Temporal.
27. M14. WCB. Minimum cranial breadth.
28. M16. Foramen magnum breadth.
29. M17. BBH. Basion-Bregma height.
30. M13a. MDB. Mastoid width. Temporal. [Width of the mastoid process at its base, through its transverse axis. Measure from the incisura mastoidea, or digastric groove, to a corresponding level on the external surface of the process, transversely with reference to the process itself, not with reference to the cranium]
31. Maximum mastoid width. [Width of the mastoid process at its base, at the level of mastoid tip, through its transverse axis. Measure from the incisura mastoidea, or digastric groove, to a corresponding level on most lateral point of the mastoid. Perpendicular to the sagittal section]
32. M19a. MDH. Mastoid height. Temporal. [The length of the mastoid process below, and perpendicular to, the eye-ear plane, in the vertical plane. Below the porion]
33. Minimum distance between the mastoid and supramastoid crests.
34. Maximum bimastoid breadth.
35. M20. Porion-bregmatic projective height.
36. AVH. Auriculare-vertex projective height.
37. Biporion breadth. Cranial vault.
38. Porion-basion projective height.
39. M29. FRC. n-b. Frontal sagittal chord.
40. FRF. Nasion-subtense fraction. Frontal. [The distance along the nasion-bregma chord, recorded from nasion, at which the nasion-bregma subtense falls]
41. FRF/M29. Nasion-subtense fraction relative to the frontal sagittal chord. [As a measurement for the position of the metopion]
42. Metopion subtense. Frontal. [Maximum distance from the metopion to the nasion-bregma chord]
43. Metopion subtense/M29. Metopion subtense relative to the nasion-bregma chord. [A measurement for the elevation of the frontal bossing (anterior-posterior convexity)]

44. Lower frontal inclination angle (m-g-i).
45. M30. PAC. Parietal sagittal chord. [The external chord, or direct distance from bregma to lambda, taken in the midplane and at the external surface]
46. M30(2). Bregma-sphenion chord (b-sphn).
47. M30(3). Lambda-asterion chord (l-ast).
48. ASI. Asterion-inion chord.
49. M30c. Bregma-asterion chord (b-ast).
50. Parietal chord index. M30/M1.
51. M31. OCC. l-o. Occipital sagittal chord. [Lambda-opisthion chord (Occipital chord). The external occipital chord, or direct distance from lambda to opisthion taken in the midplane and at the external surface]
52. M31(1). LIC. Lambda-inion chord (l-i).
53. Lambda-opisthocranion chord.
54. M31(2). Inion-opisthion chord (i-o).
55. Ratio. M31(1)/M31(2). Length of occipital (lambda-inion) plane compared to nuchal (inion- opisthion) plane. X100. [Weidenreich, 1943; Santa Luca, 1980. M31(1)/M31(2)]
56. Opisthocranion-opisthion chord.
57. Sphenobasion-opisthion length.
58. M32(1). Frontal inclination angle (b-n-i). Frontal.
59. M32(2). Bregma angle (b-g-i). Frontal.
60. M32(5). FRA. Frontal angle (b-m-n, degree).
61. M33d. OCA. Occipital angle (degree). [In the sagittal plane, the angle underlying the curvature of the occipital bone at its maximum height above the occipital chord]
62. M33e. PAA. Parietal angle (degree). [In the sagittal plane, the angle underlying the curvature of the parietal bones along the sagittal suture, at its maximum height above the parietal chord]
63. M33(4). Lambda-inion-opisthion angle (l-i-o).
64. Temporal squama length (Martínez and Arsuaga, 1997). [Distance from the incisura parietalis to the most anterior point of the temporal bone, taken parallel to the major axis of the zygomatic root. -- Martínez, I., Arsuaga, J. L. (1997): The temporal bones from Sima de los Huesos Middle Pleistocene site (Sierra de Atapuerca, Spain). A phylogenetic approach. *Journal of Human Evolution*, 33(2): 283-318]
65. Temporal squama height (Martínez and Arsuaga, 1997). [Maximum height of the squama from porion, perpendicular to the squama length. -- Martínez, I., Arsuaga, J. L. (1997): The temporal bones from Sima de los Huesos Middle Pleistocene site (Sierra de Atapuerca, Spain). A phylogenetic approach. *Journal of Human Evolution*, 33(2): 283-318]
66. Temporal squama angle (Martínez and Arsuaga, 1997). [Distance from incisura parietalis to the highest point of the temporal squama projected on the squama length -- Martínez, I., Arsuaga, J. L. (1997): The temporal bones from Sima de los Huesos Middle Pleistocene site (Sierra de Atapuerca, Spain). A phylogenetic approach. *Journal of Human Evolution*, 33(2): 283-318]
67. Temporal muscle attachment height.
68. Temporal muscle attachment length. [A raised and thickened ridge at the back of the posterior temporalis muscle attachment, where the line marking the furthest backward extent of its fan-shaped fibres angles downward and forward]
69. Temporal muscle attachment length index.
70. Transverse tympanic width. [The medial edge is defined as the lateral margin of the internal carotid canal]
71. Tympanic axis angle. [The tympanic axis is defined as the line connecting the most lateroposterior point of the carotid foramen and the point Crossing point between the inferior edge of the tympanic plate and the auditory meatus inferior border (Martínez, I., & Arsuaga, J. L., 1997). The angle is this axis relative to the sagittal plane on the Frankfurt horizontal plane. anterior angle]



72. Tympanic axis length. [The distance between the most lateroposterior point of the carotid foramen and the point Crossing point between the inferior edge of the tympanic plate and the auditory meatus inferior border.]
73. Petrous axis angle. [The petrous axis is defined as the line connecting the most lateroposterior point of the carotid foramen and the most medioanterior point of the stylomastoid foramen (Martínez, I., & Arsuaga, J. L., 1997). The anterior angle is this axis relative to the sagittal plane on the Frankfurt horizontal plane]
74. Petrous axis length. [The distance between the most lateroposterior point of the carotid foramen and the most medioanterior point of the stylomastoid foramen]
75. Tympanic angle. [The tympanic axis is defined as the line connecting the most lateroposterior point of the carotid foramen and the crossing point between the inferior edge of the tympanic plate and the auditory meatus inferior border. The petrous axis is defined as the line connecting the most lateroposterior point of the carotid foramen and the most medioanterior point of the stylomastoid foramen (Martínez, I., & Arsuaga, J. L., 1997). The tympanic angle is defined by these two axes. Projected on the Frankfurt plane]
76. Postglenoid-ectoglenoid length.
77. Postglenoid-entoglenoid length.
78. Ectoglenoid-entoglenoid length.
79. Chord length of the parietomastoid suture. Incisura parietalis - asterion.
80. Occipital height (l-sphba). [Xinzhi Wu and Sheela Athreya. 2013.]
81. Occipital subtense.
82. Occipital plane index.
83. Inion-endinion. [Xinzhi Wu and Sheela Athreya. 2013. In general, a lesser endinion-inion distance seems directly associated with rounding of the occipital as a whole]
84. M40. BPL. Basion-prosthion length.
85. M43. FMT. Bi-frontomalare temporale breadth (fmt-fmt). Frontal. [fmt, Frontomalare temporale, most lateral point on frontozygomatic suture]
86. M43a. FMB. Bifrontal breadth. Frontal. [The breadth across the frontal bone between frontomalare anterior on each side, i.e., the most anterior point on the fronto-malar suture]
87. M43b. NAS. Nasio-frontal subtense. [The subtense from nasion to the bifrontal breadth]
88. M43b/M43a. Nasion-frontal subtense relative to the bifrontal breadth.
89. Frontal. Supraorbital torus breadth. XSOT. [Greatest breadth across the supraorbital tori. This corresponds to the superior facial breadth (M43) when the tip of zygomatic process of the frontal bone flares inferolaterally as in most modern humans. but not necessary as in *Homo erectus* (Kaifu et al., 2008)]
90. M44. EKB. Biorbital breadth (ek-ek). [The breadth across the orbits from ectoconchion to ectoconchion. Ectoconchion is here defined as lying on the most anterior surface of the orbital border]
91. Supraorbital torus thickness central. Frontal. [Thickness perpendicular to the central line of the supraorbital torus]
92. Supraorbital torus thickness lateral. Frontal. [Thickness perpendicular to the central line of the supraorbital torus]
93. Supraorbital torus thickness medial. Frontal. [Thickness perpendicular to the central line of the supraorbital torus]
94. M45. ZYB. Bizygomatic breadth (zy-zy).
95. M45(1). JUB. Bijugal breadth. [The external breadth across the malars at the jugale and jugale. At the deepest points in the curvature between the frontal and temporal process of the malars. Jugale, the jugal point is the point at which lines following the margin of the frontal

- and temporal processes of the zygomatic bone are joined]
96. M46b. ZMB. Bimaxillary breadth.
  97. Facial proportion. M46b/M43.
  98. Temporal gutter angle.
  99. M48. NPH. Upper facial height. Nasion-prosthion height (n-pr).
  100. M48(1). Nasospinale-prosthion distance (ns-pr). [Height of the intermediate jaw. Straight-line distance of nasospinal (ns) from the prosthion (pr)]
  101. M74. Upper facial angle. Nasion-prosthion relative to the FH.
  102. M74(1). Clivus-alveolar plane angle. [The angle that the alveolar-condylar plane (ACE) forms with a nasospinal (ns) and prosthion (pr) connecting straight line. ACE is also called Broca's plane, which is laid by the prosthion and the two lowest points of the occipital condyles]
  103. Nasiospinale-alveolare length.
  104. Nasiospinale-alveolare angle.
  105. M48d. WMH. Cheek height. [The minimum distance, in any direction, from the lower border of the orbit to the lower margin of the maxilla, mesial to the masseter attachment, on the left side]
  106. M49a. DKB. Interorbital breadth (d-d).
  107. M50. IOW. Anterior interorbital breadth (mf-mf).
  108. M51. Orbital breadth (mf-ek). [Measured from Ectoconchion to maxillofrontale]
  109. M51a. OBB. Orbital breadth. [Breadth from ectoconchion to dacryon, as defined, approximating the longitudinal axis which bisects the orbit into equal upper and lower parts. The point of junction of the maxillary bone, lacrimal bone, and frontal bone is named the dacryon]
  110. M52. OBH. Orbital height. [The height between the upper and lower borders of the orbit, perpendicular to the long axis of the orbit and bisecting it]
  111. M54. NBL. Nasal breadth.
  112. M57(2). Upper nasal breadth of nasal bones. [Straight distance of the two points where the Suturae nasofrontalis and nasomaxillaris meet]
  113. M55. NH. Nasal height. n-ns.
  114. M61. MAB. Maxilloalveolar breadth. [The greatest breadth across the alveolar border. Wherever it is found, perpendicular to the medial plane]
  115. Maxilloalveolar length. [The greatest length of the alveolar process of maxilla]
  116. Maxillary palate length.
  117. M63. Internal palatal breadth. [Endomolar endomolare (enm - enm). Straight distance of the middle edges of the alveoli of the second molars from each other.]
  118. External alveolar breadth at canine level.
  119. External alveolar breadth at P3 level.
  120. External alveolar breadth at P4 level.
  121. External alveolar breadth at M1/M2 level.
  122. M61 relative to the external palatal breadth at the canine level.
  123. M61 relative to the external palatal breadth at the P3 level. [In frontal view, the lateral protrusion of the alveolar torus of the maxilla is sometimes also visible posterior to P3 (lateral alveolar prognathism, Pope, 1991)]
  124. M76a. SSA. Zygomaxillary angle (degree). [The angle at subspinale whose two sides reach from this point to zygomaxillare anterior left and right]
  125. Subspinale subtense. [Distance from subspinale to bi-zygomaxillary chord]
  126. M77a. NFA. Nasio-frontal angle (fm:a-n-fm:a). [The angle at nasion whose two sides reach from this point to frontomalare, left and right. This measures the facial flatness at nasion relative to the most anterior points on the external angular processes of the frontal, the

- higher the angle the less the forward protrusion of the supranasal point of the frontal relative to its external angles. It is entirely a measure of the frontal bones, it is thus more an index of transverse frontal flatness than of facial flatness. -- Howells, 1973. Also called nasion angle, can be calculated from the nasion subtense and one half the biorbital chord in Rightmire (1998).]
127. Width of nasal bridge. Rightmire 1998. [Measured at the anterior lacrimal crests, following Weidenreich (1943). The nasal bones and the bridge portions of the frontal process of the maxilla forming a continuous, curved line. The bridge itself is formed by the two nasal bones and the two bridge portions of the maxilla which are bound by the nasomaxillary margin, on one side, and the crista lacrimalis anterior, on the other.]
128. Nasal bridge height. Rightmire 1998. [Taken as a subtense to nasion, from the chord defined as the width of nasal bridge]
129. Nasal bridge index. Rightmire 1998. [The ratio of height to width, as used by Weidenreich (1943)]
130. Nasal bridge angle. Rightmire 1998. [Projection of nasion relative to the anterior lacrimal crests, calculated from the nasal bridge subtense and one half the nasal bridge width]
131. M41c. XML. Maximum malar length. [Total direct length of the malar in a diagonal direction, from the lower end of the zygo-temporal suture on the lateral face of the bone, to zygoorbitale the junction of the zygomaxillary suture with the lower border of the orbit, on the left side]
132. Maximum malar height (Rightmire et al., 2006). [Caliper. Taken approximately vertically, from the inferior margin of the malar surface to the tip of the frontal process]
133. Zygomaxillare anterior-zygoorbitale (zm:a-zo). [Zygoorbitale is the point at which zygomaxillary suture contacts lower border of the eye. Zygomaxillare anterior is the limit of the attachment of the masseter muscle on the zygomaxillary suture (Hanihara, 2000) corresponding to lowest point on the zygomaxillary suture (Iskan and Steyn, 2013)]
134. M41d. MLS. Malar subtense. [The maximum subtense from the convexity of the malar to the maximum length of the bone, at the level of the zygomaticofacial foramen, on the left side]
135. IZM height. Inferior zygomatic margin height. [A point on the inferior zygomatic margin at the level of the lateral wall of the orbit (fmo) to the horizontal plane containing prosthion (Pope, 1991)]
136. Malar angle. Posterior-inferior angle between the Frankfurt horizontal and the chord connecting the most inferior-lateral point of the orbit and the most inferior point on the malar-maxillary suture.
137. Bimandibular fossa breadth.
138. Mandibular fossa depth.
139. Midfacial prognathism.
140. M66. Bigonial breadth. go-go. Mandible.
141. M71a. Minimum ramus width.
142. Gonion coronoid height.
143. Gonion condylar height.
144. Gonion-notch height.
145. Notch width.
146. Notch depth.
147. Condylar neck length.
148. Coronoid length.
149. Coronoid width.
150. M79. Ramus angle. Angulus mandibularis. [Projected to the sagittal plane]
151. M79(1b). Angle of chin to alveolar plane (degree).
152. Pogonion-gonion length.
153. Infradentale-gonion length.
154. Infradentale to the posterior edge of the last molar at the alveolar level.

155. Infradentale to the coronoid tip.
156. Pogonion to the posterior edge of the last molar at the alveolar level.
157. Mandibular corpus height at canine.
158. Mandibular corpus height at p3.
159. Mandibular corpus height at p4.
160. Mandibular corpus height at m1.
161. Mandibular corpus height at m2.
162. Bimental breadth. [If there are more than one mental foramen, select the largest one]
163. Bicornoid breadth.
164. Binotch breadth.
165. Biramus breadth at the alveolar margin.
166. Biramus breadth at the lateral prominence.
167. Condyle articular facet breadth.
168. External breadth at i2/canine along the alveolar margin.
169. External breadth at canine along the alveolar margin.
170. External breadth at p3 along the alveolar margin.
171. External breadth at p4 along the alveolar margin.
172. External breadth at m1 along the alveolar margin.
173. External breadth at m2 along the alveolar margin.
174. External breadth at m3 along the alveolar margin.
175. Internal breadth at canine along the alveolar margin.
176. Internal breadth at p3 along the alveolar margin.
177. Internal breadth at p4 along the alveolar margin.
178. Internal breadth at m1 along the alveolar margin.
179. Internal breadth at m2 along the alveolar margin.
180. Maximum thickness of the mandibular corpus at the canine level.
181. Maximum thickness of the mandibular corpus at the p3 level.
182. Maximum thickness of the mandibular corpus at the p4 level.
183. Maximum thickness of the mandibular corpus at the m1 level.
184. Maximum thickness of the mandibular corpus at the m2 level.
185. Alveolar length of incisor region along the alveolar margin.
186. Alveolar length of canine-premolar region along the alveolar margin.
187. Alveolar length of molar region along the alveolar margin.
188. Symphysis height (id-gn).
189. Symphysis width. [When pogonion is not present, take a point which makes the connection between this point and the genion perpendicular to the long axis of the symphysis]
190. Dental. Upper I1. Mesiodistal length.
191. Dental. Upper I1. Buccolingual width.
192. Dental. Upper I1. Width/length.
193. Dental. Upper I1. Area relative to M1. LxW of I1 / LxW of M1.
194. Dental. Upper I1. Labial convexity. ASUDAS grades. UI1LC.
195. Dental. Upper I1. Lingual shovelling. ASUDAS grades. UI1SS.
196. Dental. Upper I1. Labial shovelling. ASUDAS grades. UI1DS. [Named as double-shovelling]
197. Dental. Upper I1. Tuberculum Dentale. ASUDAS grades. UI1TD.
198. Dental. Upper I2. Mesiodistal length.
199. Dental. Upper I2. Buccolingual width.
200. Dental. Upper I2. Width/length.
201. Dental. Upper I2. Area relative to I1. LxW of I2 / LxW of I1.
202. Dental. Upper I2. Labial convexity. ASUDAS grades as UI1LC.
203. Dental. Upper I2. Lingual shovelling. ASUDAS grades. UI2SS.
204. Dental. Upper I2. Labial shovelling. ASUDAS grades. UI2DS.

205. Dental. Upper I2. Tuberculum Dentale. ASUDAS grades. UI2TD.
206. Dental. Upper canine. Mesiodistal length.
207. Dental. Upper canine. Buccolingual width.
208. Dental. Upper canine. Width/length.
209. Dental. Upper canine. Area relative to M1. LxW of C1 / LxW of M1.
210. Dental. Upper canine. Tuberculum Dentale. ASUDAS grades. UCTD.
211. Dental. Upper canine. Mesial marginal ridge. ASUDAS grades. UCMR.
212. Dental. Upper canine. Distal marginal ridge. ASUDAS grades. As UCMR.
213. Dental. Upper canine. Distal accessory ridges. ASUDAS grades. UCDR.
214. Dental. Upper P3. Mesiodistal length.
215. Dental. Upper P3. Buccolingual width.
216. Dental. Upper P3. Width/length.
217. Dental. Upper P3. Area relative to M1. LxW of P3 / LxW of M1.
218. Dental. Upper P3. Mesial accessory ridges. ASUDAS grades. UP3M MXPAR.
219. Dental. Upper P3. Distal accessory ridges. ASUDAS grades. UP3D MXPAR.
220. Dental. Upper P4. Mesiodistal length.
221. Dental. Upper P4. Buccolingual width.
222. Dental. Upper P4. Width/length.
223. Dental. Upper P4. Area relative to M1. LxW of P4 / LxW of M1.
224. Dental. Upper P4. Mesial accessory ridges. ASUDAS grades. UP4M MXPAR.
225. Dental. Upper P4. Distal accessory ridges. ASUDAS grades. UP4D MXPAR.
226. Dental. Upper M1. Mesiodistal length.
227. Dental. Upper M1. Buccolingual width.
228. Dental. Upper M1. Width/length.
229. Dental. Upper M1. Metacone size. ASUDAS grades. UM1MC.
230. Dental. Upper M1. Hypocone size. ASUDAS grades. UM1HC.
231. Dental. Upper M1. Cusp 5 size. ASUDAS grades. UM1C5. [It is a cusp developed on the distal cingulum, buccal to the hypocone. Some researchers call it metaconule, but it is not the true metaconule.]
232. Dental. Upper M1. Carabelli's cusp. ASUDAS grades. UM1CB. [Carabelli's trait is referred to a cusp on the lingual surface of the protocone. It is equivalent to the pericone]
233. Dental. Upper M1. Mesostyle size. ASUDAS grades. UM1PS. [In the "Dental Morphology Manual", this small cusp is called parastyle. It is a small cusp on the distobuccal side of the paracone. The true parastyle is a small cusp mesial to the paracone]
234. Dental. Upper M1. Enamel Extension. ASUDAS grades. UMEE. ["This trait is an apical extension of the enamel from a straight line that is the usual cemento-enamel junction on the buccal surface, usually in line with the buccal groove. It is more common on maxillary than mandibular molars. Enamel in the buccal groove but not attached to the tooth crown is not considered an enamel extension, but may be an enamel pearl."]
235. Dental. Upper M2. Mesiodistal length.
236. Dental. Upper M2. Buccolingual width.
237. Dental. Upper M2. Width/length.
238. Dental. Upper M2. Area relative to M1. LxW of M2 / LxW of M1.
239. Dental. Upper M2. Metacone size. ASUDAS grades. UM2MC.
240. Dental. Upper M2. Hypocone size. ASUDAS grades. UM2HC.
241. Dental. Upper M2. Cusp 5 size. ASUDAS grades. UM2C5. [It was called metaconule by some authors, but it is not the true metaconule]
242. Dental. Upper M2. Carabelli's cusp. ASUDAS grades. UM2CB. [Carabelli's trait is referred to a cusp on the lingual surface of the protocone. It is equivalent to the pericone]
243. Dental. Upper M2. Mesostyle size. ASUDAS

- grades. UM2PS. [In the "Dental Morphology Manual", this small cusp is called parastyle. It is a small cusp on the distobuccal side of the paracone. The true parastyle is a small cusp mesial to the paracone]
244. Dental. Upper M2. Enamel Extension. ASUDAS grades. UMEE. ["This trait is an apical extension of the enamel from a straight line that is the usual cemento-enamel junction on the buccal surface, usually in line with the buccal groove. It is more common on maxillary than mandibular molars. Enamel in the buccal groove but not attached to the tooth crown is not considered an enamel extension, but may be an enamel pearl."]
245. Dental. Upper M3. Mesiodistal length.
246. Dental. Upper M3. Buccolingual width.
247. Dental. Upper M3. Width/length.
248. Dental. Upper M3. Area relative to M1. LxW of M3 / LxW of M1.
249. Dental. Upper M3. Metacone size. ASUDAS grades. As UM2MC.
250. Dental. Upper M3. Hypocone size. ASUDAS grades. As UM2HC.
251. Dental. Upper M3. Cusp 5 size. ASUDAS grades. As UM2C5. [It was called metaconule by some authors, but it is not the true metaconule]
252. Dental. Upper M3. Carabelli's cusp. ASUDAS grades. As UM2CB. [Carabelli's trait is referred to a cusp on the lingual surface of the protocone. It is equivalent to the pericone]
253. Dental. Upper M3. Mesostyle size. ASUDAS grades. As UM2PS. [In the "Dental Morphology Manual", this small cusp is called parastyle. It is a small cusp on the distobuccal side of the paracone. The true parastyle is a small cusp mesial to the paracone]
254. Dental. Upper M3. Enamel Extension. ASUDAS grades. UMEE. ["This trait is an apical extension of the enamel from a straight line that is the usual cemento-enamel junction on the buccal surface, usually in line with the buccal groove. It is more common on maxillary than mandibular molars. Enamel in the buccal groove but not attached to the tooth crown is not considered an enamel extension, but may be an enamel pearl."]
255. Dental. Lower i1. Mesiodistal length.
256. Dental. Lower i1. Buccolingual width.
257. Dental. Lower i1. Width/length.
258. Dental. Lower i1. Area relative to m1. LxW of i1 / LxW of m1.
259. Dental. Lower i1. Lingual shovelling. ASUDAS grades. LI1SS.
260. Dental. Lower i2. Mesiodistal length.
261. Dental. Lower i2. Buccolingual width.
262. Dental. Lower i2. Width/length.
263. Dental. Lower i2. Area relative to i1. LxW of i2 / LxW of i1.
264. Dental. Lower i2. Area relative to m1. LxW of i2 / LxW of m1.
265. Dental. Lower i2. Lingual shovelling. ASUDAS grades. LI2SS.
266. Dental. Lower canine. Mesiodistal length.
267. Dental. Lower canine. Buccolingual width.
268. Dental. Lower canine. Width/length.
269. Dental. Lower canine. Area relative to m1. LxW of c1 / LxW of m1.
270. Dental. Lower canine. Distal accessory ridge. ASUDAS grades. LCDR.
271. Dental. Lower p3. Mesiodistal length.
272. Dental. Lower p3. Buccolingual width.
273. Dental. Lower p3. Width/length.
274. Dental. Lower p3. Area relative to m1. LxW of p3 / LxW of m1.
275. Dental. Lower p3. Lingual cusp complexity. ASUDAS grades. LP3LC.
276. Dental. Lower p4. Mesiodistal length.
277. Dental. Lower p4. Buccolingual width.
278. Dental. Lower p4. Width/length.
279. Dental. Lower p4. Area relative to m1. LxW of



- p4 / LxW of m1.
280. Dental. Lower p4. Lingual cusp complexity. ASUDAS grades. LP4LC.
281. Dental. Lower m1. Mesiodistal length.
282. Dental. Lower m1. Buccolingual width.
283. Dental. Lower m1. Width/length.
284. Dental. Lower m1. Anterior Fovea. ASUDAS grades. LM1AF.
285. Dental. Lower m1. Deflecting wrinkle on the hypometacristid (a ridge on the buccal side of the metaconid). ASUDAS grades. LM1DW.
286. Dental. Lower m1. Protostylid. ASUDAS grades. LM1PS. [A small cusp on the distobuccal side of the protoconid]
287. Dental. Lower m1. Metastylid. LM1C7. [A cusp occurs on the distolingual side of the metaconid, between the metaconid and entoconid. Usually called cusp 7.]
288. Dental. Lower m1. Enamel Extension. ASUDAS grades. LMEE.
289. Dental. Lower m2. Mesiodistal length.
290. Dental. Lower m2. Buccolingual width.
291. Dental. Lower m2. Width/length.
292. Dental. Lower m2. Area relative to m1. LxW of m2 / LxW of m1.
293. Dental. Lower m2. Anterior Fovea. ASUDAS grades. As LM1AF.
294. Dental. Lower m2. Deflecting wrinkle on the hypometacristid (a ridge on the buccal side of the metaconid). ASUDAS grades. As LM1DW.
295. Dental. Lower m2. Protostylid. ASUDAS grades. LM2PS.
296. Dental. Lower m2. Metastylid. LM2C7.
297. Dental. Lower m2. Enamel Extension. ASUDAS grades. LMEE.
298. Dental. Lower m3. Mesiodistal length.
299. Dental. Lower m3. Buccolingual width.
300. Dental. Lower m3. Width/length.
301. Dental. Lower m3. Area relative to m1. LxW of m3 / LxW of m1.
302. Dental. Lower m3. Anterior Fovea. ASUDAS grades. As LM1AF.
303. Dental. Lower m3. Deflecting wrinkle on the hypometacristid (a ridge on the buccal side of the metaconid). ASUDAS grades. As LM1DW.
304. Dental. Lower m3. Protostylid. ASUDAS grades. As LM1PS.
305. Dental. Lower m3. Metastylid. As LM1C7.
306. Dental. Lower m3. Enamel Extension. ASUDAS grades. LMEE.
307. Dental. BPh I. Relative wear areas of buccal phase I. [Zanolli C, Kullmer O, Kelley J, Bacon A-M, Demeter F, Dumoncel J, Fiorenza L, Grine FE, Hublin J-J, Nguyen AT, Nguyen TMH, Pan L, Schillinger B, Schrenk F, Skinner MM, Ji X, Macchiarelli R. 2019. Evidence for increased hominid diversity in the Early to Middle Pleistocene of Indonesia. *Nature Ecology & Evolution* 3: 755-764.]
308. Dental. LPh I. Relative wear areas of lingual phase I. [Zanolli C, Kullmer O, Kelley J, Bacon A-M, Demeter F, Dumoncel J, Fiorenza L, Grine FE, Hublin J-J, Nguyen AT, Nguyen TMH, Pan L, Schillinger B, Schrenk F, Skinner MM, Ji X, Macchiarelli R. 2019. Evidence for increased hominid diversity in the Early to Middle Pleistocene of Indonesia. *Nature Ecology & Evolution* 3: 755-764]
309. Dental. Ph II. Relative wear areas of phase II. [Zanolli C, Kullmer O, Kelley J, Bacon A-M, Demeter F, Dumoncel J, Fiorenza L, Grine FE, Hublin J-J, Nguyen AT, Nguyen TMH, Pan L, Schillinger B, Schrenk F, Skinner MM, Ji X, Macchiarelli R. 2019. Evidence for increased hominid diversity in the Early to Middle Pleistocene of Indonesia. *Nature Ecology & Evolution* 3: 755-764]
310. Dental. Ve. Volume of enamel cap (mm<sup>3</sup>). [Zanolli C, Kullmer O, Kelley J, Bacon A-M, Demeter F, Dumoncel J, Fiorenza L, Grine FE, Hublin J-J, Nguyen AT, Nguyen TMH, Pan L, Schillinger B, Schrenk F, Skinner MM, Ji X,

- Macchiarelli R. 2019. Evidence for increased hominid diversity in the Early to Middle Pleistocene of Indonesia. *Nature Ecology & Evolution* 3: 755-764]
311. Dental. Vc. Total crown volume (mm<sup>3</sup>). [Zanolli C, Kullmer O, Kelley J, Bacon A-M, Demeter F, Dumoncel J, Fiorenza L, Grine FE, Hublin J-J, Nguyen AT, Nguyen TMH, Pan L, Schillinger B, Schrenk F, Skinner MM, Ji X, Macchiarelli R. 2019. Evidence for increased hominid diversity in the Early to Middle Pleistocene of Indonesia. *Nature Ecology & Evolution* 3: 755-764]
312. Dental. Vcdp. Volume of the crown dentine and pulp (mm<sup>3</sup>). [Zanolli C, Kullmer O, Kelley J, Bacon A-M, Demeter F, Dumoncel J, Fiorenza L, Grine FE, Hublin J-J, Nguyen AT, Nguyen TMH, Pan L, Schillinger B, Schrenk F, Skinner MM, Ji X, Macchiarelli R. 2019. Evidence for increased hominid diversity in the Early to Middle Pleistocene of Indonesia. *Nature Ecology & Evolution* 3: 755-764]
313. Dental. Vcdp/Vc. Relative size of dental and pulp. [Zanolli C, Kullmer O, Kelley J, Bacon A-M, Demeter F, Dumoncel J, Fiorenza L, Grine FE, Hublin J-J, Nguyen AT, Nguyen TMH, Pan L, Schillinger B, Schrenk F, Skinner MM, Ji X, Macchiarelli R. 2019. Evidence for increased hominid diversity in the Early to Middle Pleistocene of Indonesia. *Nature Ecology & Evolution* 3: 755-764]
314. Dental. SEDG. Surface area of the enamel-dentine junction (mm<sup>2</sup>). [Zanolli C, Kullmer O, Kelley J, Bacon A-M, Demeter F, Dumoncel J, Fiorenza L, Grine FE, Hublin J-J, Nguyen AT, Nguyen TMH, Pan L, Schillinger B, Schrenk F, Skinner MM, Ji X, Macchiarelli R. 2019. Evidence for increased hominid diversity in the Early to Middle Pleistocene of Indonesia. *Nature Ecology & Evolution* 3: 755-764]
315. Dental. 3D AET. Three dimensional average enamel thickness (mm). [Zanolli C, Kullmer O, Kelley J, Bacon A-M, Demeter F, Dumoncel J, Fiorenza L, Grine FE, Hublin J-J, Nguyen AT, Nguyen TMH, Pan L, Schillinger B, Schrenk F, Skinner MM, Ji X, Macchiarelli R. 2019. Evidence for increased hominid diversity in the Early to Middle Pleistocene of Indonesia. *Nature Ecology & Evolution* 3: 755-764]
316. Dental. 3D RET. Three-dimensional relative average enamel thickness (mm). [Zanolli C, Kullmer O, Kelley J, Bacon A-M, Demeter F, Dumoncel J, Fiorenza L, Grine FE, Hublin J-J, Nguyen AT, Nguyen TMH, Pan L, Schillinger B, Schrenk F, Skinner MM, Ji X, Macchiarelli R. 2019. Evidence for increased hominid diversity in the Early to Middle Pleistocene of Indonesia. *Nature Ecology & Evolution* 3: 755-764]
317. Dental. LEA. Lateral enamel surface area (mm<sup>2</sup>). [Zanolli C, Kullmer O, Kelley J, Bacon A-M, Demeter F, Dumoncel J, Fiorenza L, Grine FE, Hublin J-J, Nguyen AT, Nguyen TMH, Pan L, Schillinger B, Schrenk F, Skinner MM, Ji X, Macchiarelli R. 2019. Evidence for increased hominid diversity in the Early to Middle Pleistocene of Indonesia. *Nature Ecology & Evolution* 3: 755-764.]
318. Dental. RA. Root surface area (mm<sup>2</sup>). [Zanolli C, Kullmer O, Kelley J, Bacon A-M, Demeter F, Dumoncel J, Fiorenza L, Grine FE, Hublin J-J, Nguyen AT, Nguyen TMH, Pan L, Schillinger B, Schrenk F, Skinner MM, Ji X, Macchiarelli R. 2019. Evidence for increased hominid diversity in the Early to Middle Pleistocene of Indonesia. *Nature Ecology & Evolution* 3: 755-764]
319. Dental. CRR. Crown-root ratio. [Zanolli C, Kullmer O, Kelley J, Bacon A-M, Demeter F, Dumoncel J, Fiorenza L, Grine FE, Hublin J-J, Nguyen AT, Nguyen TMH, Pan L, Schillinger B, Schrenk F, Skinner MM, Ji X, Macchiarelli



- R. 2019. Evidence for increased hominid diversity in the Early to Middle Pleistocene of Indonesia. *Nature Ecology & Evolution* 3: 755-764]
320. Ratio: Maximum cranial breadth/Maximum cranial length.
321. Ratio: Least frontal breadth/Maximum frontal breadth.
322. Ratio: Bistephanic breadth/Maximum frontal breadth.
323. Ratio: Glabella-bregma chord/Maximum frontal breadth.
324. Ratio: Biasterion breadth/Maximum cranial breadth at supramastoid crest.
325. Ratio: Minimum cranial breadth/Maximum cranial breadth.
326. Ratio: Minimum cranial breadth/Maximum frontal breadth.
327. Ratio: Foramen magnum breadth/Foramen magnum length.
328. Ratio: Basion-Bregma height/Maximum cranial breadth.
329. Ratio: Basion-Bregma height/Maximum cranial length.
330. Ratio: Mastoid width/Maximum mastoid width.
331. Ratio: Mastoid height/Maximum mastoid width.
332. Ratio: Auriculare-vertex projection height/Maximum cranial breadth.
333. Ratio: n-b frontal sagittal chord/Glabella-bregma chord.
334. Ratio: Frontal sagittal chord/Parietal sagittal chord.
335. Ratio: b-sphn bregma-sphenion chord/l-ast lambda-asterion chord.
336. Ratio: Occipital sagittal chord/Parietal sagittal chord.
337. Ratio: Lambda-inion chord/Parietal sagittal chord.
338. Ratio: Frontal angle/Parietal angle.
339. Ratio: Occipital angle/Parietal angle.
340. Ratio: Temporal squama height/Temporal squama length.
341. Ratio: Temporal muscle attachment height/Auriculare-vertex projection height.
342. Ratio: Postglenoid-ectoglenoid length/Postglenoid-entoglenoid length.
343. Ratio: Ectoglenoid-entoglenoid length/Postglenoid-entoglenoid length.
344. Ratio: Basion-prosthion length/Maximum cranial length.
345. Ratio: Bi-frontomolare temporale breadth/Maximum cranial length.
346. Ratio: Bi-frontomolare temporale breadth/Maximum frontal breadth.
347. Ratio: Supraorbital torus thickness medial/Supraorbital torus thickness central.
348. Ratio: Supraorbital torus thickness lateral/Supraorbital torus thickness central.
349. Ratio: Bijugal breadth/Supraorbital torus breadth.
350. Ratio: Nasion-prosthion height/Maximum cranial length.
351. Ratio: Nasion-prosthion height/Supraorbital torus breadth.
352. Ratio: Nasiospinale-alveolare length/Nasion-prosthion height.
353. Ratio: Cheek height/Maximum cranial length.
354. Ratio: Cheek height/Supraorbital breadth.
355. Ratio: Interorbital breadth (d-d)/Supraorbital breadth.
356. Ratio: Orbital height OBH/Orbital breadth OBB.
357. Ratio: Nasal breadth NBL/Nasal height NH.
358. Ratio: Maxilloalveolar breadth/Maxilloalveolar length.
359. Ratio: Maxilloalveolar breadth/Supraorbital torus breadth.
360. Ratio: Maxilloalveolar breadth/Maximum cranial length.
361. Ratio: Internal palatal breadth/Maxilloalveolar breadth.

362. Ratio: External alveolar breadth at P3/External alveolar breadth at canine.
363. Ratio: External alveolar breadth at P4/External alveolar breadth at canine.
364. Ratio: External alveolar breadth at M1-M2/External alveolar breadth at canine.
365. Ratio: Width of nasal bridge/Bimaxillary breadth.
366. Ratio: Maximum malar length/Bimaxillary breadth.
367. Ratio: Maximum malar height/Bimaxillary breadth.
368. Ratio: Inferior zygomatic margin height/Bimaxillary breadth.
369. Ratio: Bimandibular fossa breadth/Maximum cranial length.
370. Ratio: Bimandibular fossa breadth/Maximum cranial breadth.
371. Ratio: Midfacial prognathism/Maximum cranial length.
372. Ratio: Midfacial prognathism/Upper facial height.
373. Ratio: Minimum ramus width/Gonion-notch height.
374. Ratio: Gonion-notch height/Bigonial breadth go-go.
375. Ratio: Notch width/Minimum ramus width.
376. Ratio: Notch depth/Gonion-notch height.
377. Ratio: Pogonion-gonion length/Bigonial breadth go-go.
378. Ratio: Mandibular corpus height at canine/Infradentale to the posterior edge of the last molar at the alveolar level.
379. Ratio: Mandibular corpus height at p3/Mandibular corpus height at canine.
380. Ratio: Mandibular corpus height at p4/Mandibular corpus height at canine.
381. Ratio: Mandibular corpus height at m1/Mandibular corpus height at canine.
382. Ratio: Mandibular corpus height at m2/Mandibular corpus height at canine.
383. Ratio: Bimental breadth/Bigonial breadth go-go.
384. Ratio: Condyle articular facet breadth/Infradentale to the posterior edge of the last molar at the alveolar level.
385. Ratio: External breadth at i2/canine along the alveolar margin/External breadth at canine along the alveolar margin.
386. Ratio: External breadth at p3 along the alveolar margin/External breadth at canine along the alveolar margin.
387. Ratio: External breadth at p4 along the alveolar margin/External breadth at canine along the alveolar margin.
388. Ratio: External breadth at m1 along the alveolar margin/External breadth at canine along the alveolar margin.
389. Ratio: External breadth at m2 along the alveolar margin/External breadth at canine along the alveolar margin.
390. Ratio: External breadth at m3 along the alveolar margin/External breadth at canine along the alveolar margin.
391. Ratio: Internal breadth at m1 along the alveolar margin/External breadth at m1 along the alveolar margin.
392. Ratio: External breadth at m1 along the alveolar margin/Infradentale to the posterior edge of the last molar at the alveolar level.
393. Ratio: Maximum thickness of the mandibular corpus at the p3 level/Maximum thickness of the mandibular corpus at the canine level.
394. Ratio: Maximum thickness of the mandibular corpus at the p4 level/Maximum thickness of the mandibular corpus at the canine level.
395. Ratio: Maximum thickness of the mandibular corpus at the m1 level/Maximum thickness of the mandibular corpus at the canine level.
396. Ratio: Maximum thickness of the mandibular corpus at the m2 level/Maximum thickness of the mandibular corpus at the canine level.

397. Ratio: Alveolar length of incisor region along the alveolar margin/Alveolar length of molar region along the alveolar margin.
398. Ratio: Alveolar length of canine-premolar region along the alveolar margin/Alveolar length of molar region along the alveolar margin.
399. Ratio: Symphysis width/Symphysis height (idgn).

## Appendix 2. Discrete phenomic characters used for phylogenetic analysis

400. Frontal. Anterior view. Supraorbital tori arching in anterior view. [Related character: double-arched torus. It's two rather parallel-bordered arches, one above each orbit.]  
 -- straight (0)  
 -- gently arching (1)  
 -- strongly arching (2)
401. Frontal. Anterior view. Supraorbital torus divided into distinct medial and lateral portions.  
 -- absent (0)  
 -- present (1)
402. Frontal. Anterior view. Supraorbital torus lateral thinning.  
 -- absent (0)  
 -- present (1)
403. Frontal. Anterior view. Supraorbital torus parallel-bordered. [Superior and inferior borders of the supraorbital torus are rather parallel.]  
 -- Present. (0)  
 -- Absent in young individual. (1)  
 -- Absent. (2)
404. Frontal. Anterior view. Superciliary arch. [Referred to a ridge or crest on the media part of the supraorbital torus only.]  
 -- Absent (0)  
 -- Present, weak (1)  
 -- Present, strong (2)
405. Frontal. Anterior view. Fusion of superciliary arcs (arcus superciliaris) at the glabellar level (Zeitoun, V., 2000). [Zeitoun, V. Reappraisal of the species *Homo erectus* (Dubois, 1893). Use of morphologic and metric data in cladistic investigation of the case of *Homo erectus*. Bull. Mem. Soc. Anthropol. Paris Nouvelle S"]  
 -- Unmerged. (0)  
 -- Merged. (1)
406. Frontal. Anterior view. Supraorbital sulcus.  
 -- Absent (0)  
 -- Shallow (1)  
 -- Deep (2)
- Foramen (3)
407. Frontal. Anterior view. Supraorbital arch.  
 -- Thick (0)  
 -- Thin (1)
408. Frontal. Anterior view. Supraorbital lateral tubercle.  
 -- Small (0)  
 -- Large (1)  
 -- Very large (2)
409. Frontal. Anterior view, superior view. Supraorbital trigon surface topography.  
 -- Posteriorly concave (0)  
 -- Flat (1)
410. Frontal. Anterior view, superior view. Supraorbital trigon orientation.  
 -- Posterior-lateral (0)  
 -- Mainly lateral, slightly posterior (1)  
 -- Anterior-lateral (2)
411. Frontal. Anterior view. Zygomatic process of the frontal bone flaring inferolaterally. [As in most of modern humans, but not necessarily so in *H. erectus*]  
 -- absent (0)  
 -- present (1)
412. Frontal. Superior view. Supraorbital torus arching in superior view.  
 -- straight (0)  
 -- gently arching (1)  
 -- strongly arching (2)
413. Frontal. Superior view. Supraorbital torus orientation relative to the glabella.  
 -- in the same as plane (0)  
 -- the glabellar and orbital segments on different planes (1)
414. Frontal. Superior view. Glabella concavity relative to the supraorbital tori.  
 -- deep (0)  
 -- shallow (1)  
 -- absent (2)
415. Frontal. Lateral view. Supraorbital torus

- smoothly rolled. [Related character: double-arched torus. Evenly curved profile (rolled) in lateral view]  
 -- absent (0)  
 -- present (1)
416. Frontal. Anterior view. Frontal Keeling.  
 -- absent (0)  
 -- weak (1)  
 -- strong (2)
417. Frontal. Lateral view. Bregmatic eminence.  
 [Present in *Homo erectus*.]  
 -- absent (0)  
 -- present (1)
418. Frontal. Lateral view. Cranial vault thickness at bregma. [Modified from Gilbert 2008.]  
 -- thin, thinner than 7.5 mm (0)  
 -- thick, between 7.5-9.5 mm (1)  
 -- very thick, larger than 9.5 mm (2)
419. Frontal. Lateral view. Forehead elevation.  
 [Convexity along the sagittal profile of the frontal bone between the supratotal sulcus and the bregma. When the frontal presented even curvature, it was scored as 0, such in Sangiran 17. Some have slightly convexity, such as the Zhoukoudian specimens. Modern human are scored as pronounced convexity. Modified from Gilbert, 2008.]  
 -- Flat. (0)  
 -- Slightly convex. (1)  
 -- Strongly convex. (2)
420. Frontal. Lateral view. Position of the most prominent aspect of midsagittal profile. [Wu X, Athreya S. 2013. A description of the geological context, discrete traits, and linear morphometrics of the middle Pleistocene hominin from Dali, Shaanxi Province, China. American Journal of Physical Anthropology 150: 141-157.]  
 -- Low (0)  
 -- High (1)
421. Frontal. Lateral view. Posttoral sulcus.  
 Concavity of the region between supraorbital torus and frontal squama.  
 -- deep (0)  
 -- moderate (1)  
 -- absent or very shallow (2)
422. Frontal 4. Anterior view. Glabellar inflexion.  
 [Transverse concavity at the glabella. It is the concavity separating the supraorbital tori. Modified from Gilbert, 2008.]  
 -- Flat or slightly concave. (0)  
 -- Shallow. (1)  
 -- Deep. (2)
423. Frontal. Mid-sagittal supraglabellary tubercle (Zeitoun, 2000). [A tubercle at the junction of the postorbital sulcus and the frontal squama. Always present in the Neanderthals, Zeitoun, V. Reappraisal of the species *Homo erectus* (Dubois, 1893). Use of morphologic and metric data in cladistic investigation of the case of *Homo erectus*. Bull. Mem. Soc. Anthropol. Paris Nouvelle S"]  
 -- Absent. (0)  
 -- Present. (1)
424. Frontal 7. Superior view. Postorbital constriction. [It was measured as an index of chord between two temporal lines at the point of maximum constriction divided by maximum cranial breadth. Because in many fossils, the cranium was incomplete, it is very hard to estimate the chord and the breadth. Here it is scored as very deep like in some *H. erectus*, moderate as in Neanderthals, and shallow as in *H. sapiens*.]  
 -- Very deep. (0)  
 -- Deep. (1)  
 -- Moderate. (2)  
 -- Shallow. (3)
425. Frontal. Lateral. Frontal bossing. [Frontal bossing is not present in the Sima de los Huesos crania, but it is present in Neanderthals. Boss is a smooth, round, broad eminence. Female *Homo*

- sapiens* skulls tend to show more bossing of the frontal bone than those of males.]
- Absent. (0)
- Present. (1)
426. Frontal. Internal. Frontal sinus. [Weidenreich, 1943, 1951. Rightmire, 2004, 2007, 2008]
- Absent. (0)
- Present. (1)
427. Frontal. Internal. Frontal sinus lateral extension.
- small, not reaching midorbit laterally. (0)
- large, reaching midorbit laterally. (1)
428. Frontal. Internal. Frontal sinus posterior extension.
- No posterior extension. (0)
- Invading the frontal squama. (1)
429. Frontal. Development of the temporal line on the frontal. [When present double temporal line, score the strongest one.]
- Strong, elevated, extends to the frontal-parietal suture. (0)
- Moderate, low, extends to the frontal-parietal suture. (1)
- Weak, elevated crest present at the posterior side of the orbit only. (2)
430. Frontal. Double temporal line on the frontal.
- Absent. (0)
- Present. (1)
431. Maxillary. Anterior view. Internal nasal margin medial projection. [Development of an internal nasal margin bearing a well-developed and vertically oriented medial projection. An apomorphic form Neanderthals. Schwartz, J. H., Tattersall, I., 1996. Called "internal nasal rim" in Ref.. It was described as absent for the Sima de los Huesos crania.]
- Absent. (0)
- Present. (1)
432. Maxillary. Anterior view. Swelling of the lateral nasal cavity wall into the capacious posterior nasal cavity. [An apomorphic feature of Neanderthals. Schwartz, J. H., Tattersall, I., 1996.]
- Absent. (0)
- Present. (1)
433. Maxillary. Medial view. Lack of an ossified roof over the lacrimal groove. [An apomorphic feature of Neanderthals. Schwartz, J. H., Tattersall, I., 1996]
- Yes. (0)
- No. (1)
434. Maxillary. Anterior view, medial view. Conchal crest extends to the nasal margin. [Inferior nasal concha anteriorly continues the conchal crest. A *Homo sapiens* character.]
- Absent. (0)
- Present. (1)
435. Maxillary. Anterior view, medial view. Inferior concha covering the lacrimal groove. [Present in *Homo sapiens*.]
- Absent. (0)
- Present. (1)
436. Maxillary. Anterior view. Lateral view. Inflation of the maxillary below the orbit. [A Neanderthal feature, also present in Petralona 1.]
- Absent. (0)
- Present. (1)
437. Maxillary. Anterior view. Lateral view. Paranasal inflation. Maxilla superior lateral inflation of the bone surrounding the nasal aperture [As in Sangiran 17, Dali, and Jinniushan. Pope, 1992.]
- Absent (0)
- Present (1)
438. Maxillary. Anterior view. Zygomaticoalveolar crest. [Zygomaticoalveolar crest is the inferior zygomaticomaxillary margin (Pope, 1991). State 2 "deeply arched" is equivalent to a prominently developed malar notch (incisura malaris).]
- Oblique (0)
- gently arched (1)
- deeply arched (2)
439. Maxillary. Anterior view. Dorsal-ventral

- position of the root of the zygomaticoalveolar crest. [Low as in Neanderthals. Intermedia as in the Sima de los Huesos crania. High as in modern human.]
- Low. (0)
  - Intermedia. (1)
  - High. (2)
440. Zygomatic, Maxillary. Anterior view. Zygomaticoalveolar crest (Inferior zygomaticomaxillary margin) extends to the zygion. [Zygion is the most lateral point the zygomatic bone.]
- Absent. (0)
  - Present. (1)
441. Maxillary. Ventral view. Anterior-posterior position of the root of the zygomaticoalveolar crest.
- M2-M3 (0)
  - M1-M2 (1)
  - P4-M1 (2)
  - P3-4 (3)
442. Zygomatic, Maxillary. Anterior view. Inferior orbital torus.
- Absent. (0)
  - Present. (1)
443. Zygomatic, Maxillary. Anterior view, lateral view. Malar tubercle. [Lateral prominence used by Weidenreich 1943. It is not necessarily associated with the zygomaticomaxillary suture. Here, the malar tubercle refers to an inferiorly projecting tubercle which, in anatomically modern humans, marks the anterior origin of the masseter muscle (Pope, 1991).]
- Absent or weak (0)
  - Strong (1)
444. Zygomatic, Maxillary. Anterior view. Malar tubercle position. [The placement of the tubercle relative to a vertical line marking the lateral wall of the orbit (a vertical line intersecting fmo (frontomalare orbitale) and parallel to the medial sagittal plane) (Pope, 1991)]
- Completely lateral to the lateral wall of the orbit (0)
  - Slightly lateral to the lateral wall of the orbit (1)
  - Below the lateral wall of the orbit (2)
  - Slightly medial to the lateral wall of the orbit (3)
  - Completely medial to the lateral wall of the orbit (4)
445. Maxillary. Ventral view. Anterior-posterior position of the incisive foramen.
- P4. (0)
  - P3. (1)
  - Canine. (2)
446. Maxillary. Anterior view. Lateral view. Canine fossa. [Canine fossa is coincident with the infraorbital depression sensu Maureille (1994), which produces a horizontal incurvation as well as an incurvation of the zygomaticoalveolar crest. It refers to an extended infraorbital depression that affects most, if not the entire zygomatic process of the maxilla.]
- Absent (0)
  - Present, shallow (1)
  - Present, deep (2)
447. Maxillary. Anterior view. Sulcus maxillaries. [A vertical groove inferior to the infraorbital foramen, a furrow-like sulcus, which would lie lateral to the canine jugum.]
- Absent (0)
  - Present (1)
448. Maxillary. Superior view. Anterior view. Maxillary flexion [A zone of flexion along the junction of the two maxillary surfaces: the infraorbital plate and the more sagittal one of the lateral nasal wall. This flexure can be easily noticed in a transverse (horizontal) cross-section. Neanderthals have a uniplanar facial surface (sometimes may even be slightly convex), which lacks both a canine fossa and maxillary flexion.]

- present (0)  
 -- absent (1)
449. Maxillary. Anterior view. Lateral view. Infraorbital plate orientation. [Diagonally orientated in Neanderthals.]  
 -- diagonally (0)  
 -- coronally (1)
450. Maxillary. Lateral view. Maxillary torus.  
 -- present (0)  
 -- absent (1)
451. Maxillary. Anterior view. Lateral view. Subnasal clivus shape. [overall curvature in sagittal and transverse directions]  
 -- Convex (0)  
 -- Flat (1)  
 -- Concave (2)
452. Maxillary. Anterior view. Anterior nasal sill crest. [The nasal sill is the floor of the nasal opening.]  
 -- absent or very weak (0)  
 -- present (1)
453. Maxillary. Anterior view. Anterior nasal sill central spine  
 -- Absent. (0)  
 -- Small. (1)  
 -- Large. (2)
454. Maxillary. Anterior view. Philtrum crest.  
 -- Absent. (0)  
 -- Present. (1)
455. Maxillary. Anterior view. Anterior nasal sill crest continuous with the lateral nasal margin  
 -- Absent. (0)  
 -- Present. (1)
456. Maxillary. Palatine. Ventral view. Elevated ridges along both sides of the inter maxillary suture. [Mainly on the maxillary. It is not considered as the palatine torus.]  
 -- absent (0)  
 -- present (1)
457. Palatine. Maxillary. Ventral view. Palatine torus. [Palatine torus is a bony exostosis that is expressed on both side of the midline on the hard palate (Scott and Irish, 2017).]  
 -- Absent (0)  
 -- Small, elevated for about 1-5 mm, limited to the palatine bones. (1)  
 -- Large, elevated for about 5-10 mm, extends onto the maxillary. (2)  
 -- Very large, elevated greater than 10 mm long, extends to the maxillary. (3)
458. Palatine. Ventral view. Surface. [Rightmire 1998.]  
 -- Rugose (0)  
 -- Smooth (1)
459. Parietal. Posterior view. Parietal keeling.  
 -- Absent. (0)  
 -- Weak. (1)  
 -- Strong. (2)
460. Parietal. Superior view. Obelion depression [Depression along the sagittal suture]  
 -- Absent. (0)  
 -- Present. (1)
461. Parietal. Parasagittal hollowing on both sides of the parietal suture.  
 -- Absent. (0)  
 -- Present. (1)
462. Parietal. Lateral view. Superior view. Temporal line.  
 -- Absent. (0)  
 -- Present, low. (1)  
 -- Present, strong ridge. (2)
463. Parietal. Lateral view. Temporal double line band. [Modified from Mounier, A. & Caparros, M. Le statut phylogénétique d'*Homo heidelbergensis* - étude cladistique des hominins du Pléistocène moyen. BMSAP 27, 110-134, doi:10.1007/s13219-015-0127-4 (2015).]  
 -- Absent. (0)  
 -- Present, single line. (1)  
 -- Present, double lines, the band narrow. <20 mm. (2)



- Present, double lines, the band wide.  $\geq 20$  mm. (3)
464. Parietal. Lateral view. Posterior view. Position of the superior temporal line. [Mounier, A. & Caparros, M. Le statut phylogénétique d'*Homo heidelbergensis* - étude cladistique des hominins du Pléistocène moyen. BMSAP 27, 110-134, doi:10.1007/s13219-015-0127-4 (2015).]  
 -- High. (0)  
 -- Intermediate. (1)  
 -- Low. (2)
465. Parietal. Lateral view. Torus angulari. [Angular torus is a raised and thickened ridge at the back of the posterior temporalis muscle attachment, where the line marking the furthest backward extent of its fan-shaped fibers angles downward and forward. The torus angular on parietal was first described by Weidenreich (1943) as a round bulge at the angle of the lambdoid suture and parietomastoid suture.]  
 -- Absent. (0)  
 -- Present, small, ridge like. (1)  
 -- Present, large, rounded bulge. (2)
466. Parietal. Posterior view. Parietal eminence. [Parietal tuber.]  
 -- Absent. (0)  
 -- Present. (1)
467. Parietal. Thickness at parietal eminence (or the center). [Cranial vault thickness at the parietal tuber. If the parietal eminence is absent, take the middle point of the parietal.]  
 -- thick (0)  
 -- intermediate (1)  
 -- thin (2)
468. Parietal. Lateral view. Lambdoidal flattening.  
 -- Absent (0)  
 -- Present (1)
469. Occipital. Posterior inferior view. Supreme nuchal line.  
 -- Absent (0)
- Weak (1)  
 -- Moderately developed (2)  
 -- Highly elevated (3)
470. Occipital. Posterior inferior view. Extension of the supreme nuchal line.  
 -- Limited in the middle region. (0)  
 -- Continuous from asterion to asterion. (1)
471. Occipital. Posterior inferior view. Superior nuchal line.  
 -- Absent. (0)  
 -- Weak. (1)  
 -- Moderately developed. (2)  
 -- Highly elevated. (3)
472. Occipital. Posterior inferior view. Extension of the superior nuchal line.  
 -- Limited in the middle region. (0)  
 -- Continuous from asterion to asterion. (1)
473. Occipital. Posterior inferior view. Inferior nuchal line.  
 -- Absent. (0)  
 -- Weak. (1)  
 -- Moderately developed. (2)  
 -- Highly elevated. (3)
474. Occipital. Posterior inferior view. Occipital crest. [An external bony ridge that separates left and right halves of the nuchal plane of the occipital bone.]  
 -- Weak. (0)  
 -- Moderately developed. (1)  
 -- High ridge. (2)
475. Occipital. Posterior view. Occipital torus thickness at the middle line. [Transverse bony thickening along the border of the nuchal and occipital planes. The occipital torus is formed between the superior and supreme nuchal lines.]  
 -- Absent (0)  
 -- superoinferiorly thin (1)  
 -- moderate (2)  
 -- thick (3)
476. Occipital. Posterior view. Occipital torus transverse extension. [Variable in *Homo erectus*.

- Modified from Gilbert, 2008.]
- long, continuous from asterion to asterion. (0)
  - narrow, present near the middle line. (1)
477. Occipital. Posterior view. Occipital torus central depression.
- absent, torus straight in the middle (0)
  - present, depression in the middle (1)
478. Occipital. Posterior view. Occipital supratoral sulcus.
- present (0)
  - absent (1)
479. Occipital. Posterior view. Ventral view. Suprainiac fossa. [The cratered area is present in the Sima de los Huesos and Swanscombe. The Neanderthal suprainiac fossa is smaller, clearly sunken, and more inferiorly oriented. Also called suprainiac depression, "Santa Luca, A. P., 1978, A re-examination of presumed Neandertal-like fossils: Journal of Human Evolution, v. 7, no. 7, p. 619-636."]
- absent (0)
  - present, small pit (1)
  - present, large, oval "cratered" area (2)
  - present, large, oval or triangle depression (3)
480. Occipital. Lateral view. Opisthocranion position. [In *Homo sapiens* and Sima de los Huesos, the opisthocranion lies on the occipital plane, In contrast, in early *Homo* and Asian *H. erectus*, the opisthocranion always lies on the occipital torus.]
- On the occipital torus. (0)
  - On the occipital plane. (1)
481. Occipital. Lateral view. Inion separate from opisthocranion.
- No or very close (0)
  - Yes (1)
482. Occipital. Lateral view. Occipital bun.
- absent, occipital plane exhibits small curvature (0)
  - present, small, occipital plane exhibits large curvature (1)
- present, large, occipital plane exhibits very large curvature (2)
483. Occipital. Ventral view. Postcondyloid tuberosities
- present (0)
  - absent (1)
484. Occipital. Ventral view. opisthionic recess (narrowing) at the rear of the foramen magnum
- Present (0)
  - Absent (1)
485. Occipital. Endocranial. Cerebellar fossa area relative to the cerebral fossa. [Moderns have a cerebellar fossa to cerebral fossa ratio of about 2:1, or a 100% larger area devoted to the cerebellar fossa. In "*Sinanthropus*", the ratio is reversed, with the cerebellar fossa only 50% as large as the cerebral fossa (Weidenreich, 1943).]
- Cerebral fossa larger (0)
  - Cerebellar fossa larger (1)
486. Temporal. Posterior view. Mastoid process thickness
- thin (0)
  - thick (1)
487. Temporal. Ventral view. Digastric fossa depth. [Also known as mastoid notch. It is the medial notch on the inferior surface of the mastoid process. It gives origin to the posterior belly of the digastric muscle.]
- deep (0)
  - shallow (1)
488. Temporal-occipital. Posterior view. Juxtamastoid process (or eminence)
- absent (0)
  - small (1)
  - large (2)
489. Temporal. Posterior view. Ventral view. Sulcus for occipital artery
- absent (0)
  - present (1)
490. Temporal-occipital. Posterior view. Ventral view. Occipitomastoid crest [The

- occipitomastoid suture is usually flat in modern humans, but is usually elevated in the Neanderthal crania. The elevated occipitomastoid suture is referred as occipitomastoid crest.]
- absent (0)
  - low (1)
  - high (2)
491. Temporal. Posterior inferior view. Mastoid process ventral projection relative to the temporal-occipital suture.
- At the same level. (0)
  - Below the suture. (1)
  - Markedly below. (2)
  - Higher than the suture. (3)
492. Temporal. Ventral view. Position of the tip of the mastoid process relative to the external meatus
- More medially positioned (0)
  - Mediolaterally at the same level or slightly lateral (1)
493. Temporal. Posterior view. Mastoid foramen position.
- at the temporal-occipital suture (0)
  - media to the temporal-occipital suture (1)
  - lateral to the temporal-occipital suture (2)
494. Temporal. Posterior view. Mastoid foramen number.
- absent (0)
  - one (1)
  - more than one (2)
495. Temporal. Ventral view. Articular eminence.
- flat (0)
  - raised, projected (1)
496. Temporal. Ventral view. Preglenoid planum. [Large in modern humans (Pope G G. 1992. Craniofacial evidence for the origin of modern humans in China. *American Journal of Physical Anthropology*, 35: 243-298).]
- Absent (0)
  - Small (1)
  - Large (2)
497. Temporal. Ventral view. Postglenoid process.
- absent (0)
  - small (1)
  - large (2)
498. Temporal. Ventral view. Entoglenoid process.
- absent (0)
  - small (1)
  - large (2)
499. Temporal. Ventral view. Medial recess. [The entoglenoid process is separated from the tympanic bone by a deep gap or medial recess.]
- broad (0)
  - narrow (1)
500. Temporal. Ventral view. Contribution of the sphenoid bone to the medial wall of the glenoid fossa. [Modified from Martínez, I., & Arsuaga, J. L. (1997). The temporal bones from Sima de los Huesos Middle Pleistocene site (Sierra de Atapuerca, Spain). A phylogenetic approach. *Journal of Human Evolution*, 33(2), 283-318. doi:<https://doi.org/10.1006/jhev.1997.0155>]
- absent (0)
  - small (1)
  - large (2)
501. Temporal. Ventral view. Glenoid fossa depth.
- shallow (0)
  - deep (1)
502. Temporal. Ventral view. Glenoid fossa anterior-posterior width [Preglenoid eminence is excluded.]
- Anterior-posteriorly very narrow. (0)
  - Narrow. (1)
  - Relatively broad. (2)
  - Very broad. (3)
503. Temporal. Ventral view. Glenoid fossa shape.
- Oval fossa. (0)
  - Transverse trough. (1)
504. Temporal. Ventral view. Glenoid fossa overhang. [Proportion of the fossa that overhangs the external cranial vault.

- Lordkipanidze, D. Better seen from the anterior-ventral view.]
- Equal or greater than 50 percent (0)
  - Less than 50 percent (1)
505. Temporal. Ventral view. Medirolateral course of the squamotympanic fissure coincides with the deepest portion of the glenoid fossa
- Present (0)
  - Positioned more posteriorly (1)
506. Temporal. Lateral view. Deepest point of the glenoid fossa dorsal-ventral position relative to the external acoustic meatus.
- Close to the dorsal edge of the meatus. (0)
  - Close to the ventral edge of the meatus. (1)
507. Temporal. Ventral view. Styloid process fused to the basicranium [In *Homo erectus*, the styloid process probably is not fused to the basicranium. It was regarded as absent by some researchers (Pope G G. 1992. Craniofacial evidence for the origin of modern humans in China. *American Journal of Physical Anthropology*, 35: 243-298).]
- absent (0)
  - present (1)
508. Temporal. Ventral view. Vaginal process. [In contrast to hominoids and *Homo erectus*, the styloid process is partially surrounded by a flange of bone in modern humans and Neanderthals. This flange of bone is the vaginal process. (as it was figured in: Pope G G. 1992. Craniofacial evidence for the origin of modern humans in China. *American Journal of Physical Anthropology*, 35: 243-298).]
- absent (0)
  - present (1)
509. Temporal. Ventral view. Process supratubalis. [In *Homo erectus*, there is neither a styloid process nor vaginal process, but there is a process supratubalis (Pope G G. 1992. Craniofacial evidence for the origin of modern humans in China. *American Journal of Physical Anthropology*, 35: 243-298).]
- Present (0)
  - Absent (1)
510. Temporal. Ventral view. Stylomastoid foramen position relative to the line of digastric groove
- More medially positioned (0)
  - Aligned with the styloid process and the digastric groove (1)
  - More laterally positioned (2)
511. Temporal. Ventral view. Tympanic plate orientation. [In *Homo erectus* (Sangiran 17), the tympanic plate is more sagittally orientated. In *Homo sapiens*, the tympanic plate is more coronally orientated.]
- More coronally orientated (0)
  - More sagittally orientated (1)
512. Temporal. Lateral view. Tympanic plate thickness. [Weidenreich, 1951. Martínez and Arsuaga, 1997. Tympanic plate is a curved platelike bone that is part of the temporal bone and forms the floor and anterior wall of the external auditory canal.]
- Thick (0)
  - moderate (1)
  - thin (2)
513. Temporal. Ventral view. Shape of the anteroinferior surface of the tympanic.
- Rounded (0)
  - Flat (1)
514. Temporal. Ventral view. Tympanomastoid fissure
- Wide, known as mastoid groove (0)
  - Narrow (1)
515. Temporal. Lateral view. Superior edge shape of the temporal squama.
- convex, with an arched or subtriangular superior border (0)
  - flat (1)
516. Temporal. Lateral view. Supramastoid crest.
- absent or very weak (0)
  - moderate (1)

- marked (2)
517. Temporal. Lateral view. Anterior mastoid tubercle on the mastoid process [Called mastoid crest or tuberosity in "Santa Luca, A. P., 1978, A re-examination of presumed Neandertal-like fossils: *Journal of Human Evolution*, v. 7, no. 7, p. 619-636."]  
 -- absent or weak (0)  
 -- strong (1)
518. Temporal-parietal. Posterior view. Cranium form. Pentagonal-globular form. [Klein, R. G., 2009, *The human career. Human biology and cultural origins. Third edition.*, Chicago and London, The University of Chicago, 989 p.]  
 -- Low pentagonal. (0)  
 -- Intermediate pentagonal. (1)  
 -- High pentagonal. (2)  
 -- Globular. (3)
519. Temporal-parietal. Posterior view. Maximum cranial breadth position.  
 -- at the supramastoid crest. (0)  
 -- slightly above the supramastoid crest. (1)  
 -- above the supramastoid crest. (2)
520. Temporal-Parietal. Posterior view. Lateral cranial walls. [Convergent superiorly, as in early *Homo* and Asian *H. erectus*. Parallel or slightly convergent superiorly as in Sima de los Huesos crania and other European MPHs (Swanscombe, Steinheim, Reilingen, Petralona). Circular outline as in Neanderthals. Divergent lateral walls with marked parietal bosses as in *Homo sapiens*.]  
 -- Convergent superiorly (0)  
 -- parallel or slightly convergent superiorly (1)  
 -- circular outline (2)  
 -- divergent lateral walls with marked parietal bosses (3)
521. Nasal. Lateral view. Nasal root projecting  
 -- At the same sagittal level as the glabella. (0)  
 -- Deeply concave. (1)
522. Nasal. Lateral view. Inferior end projecting.
- absent (0)  
 -- present (1)
523. Nasal. Anterior view. Internasal keeling. [Rightmire, 1998.]  
 -- Absent (0)  
 -- Present (1)
524. Sphenoid. Lateral view. Basicranial flexion, flexion between the pre-sellar sphenoid and the sphenoid-occipital clivus. [In Dmanisi crania, the basicranial flexion is strong. In *Australopithecus* it is moderate. In chimpanzees, it is weak.]  
 -- Weak (0)  
 -- Moderate (1)  
 -- Strong (2)
525. Sphenoid. Ventral view. Sphenoid spine extends inferiorly without contributing directly to medial wall of mandibular fossa [Stringer, 1984]  
 -- absent (0)  
 -- present, small (1)  
 -- present, large (2)
526. Mandible 1. Lateral view. Incurvatio mandibulae. [Below the alveolar margin, the bone may be curved inward, presenting a shallow depression that has been referred to as the "incurvatio mandibularis" (Hublin & Tillier, 1981), the "incurvatio mandibulae" (Rosas, 1995), or the "impressio subincisiva externa" (Inke, 1967). Schwartz and Tattersall, 2000.]  
 -- absent (0)  
 -- shallow (1)  
 -- deep (2)
527. Mandible 2. Lateral view. Symphyseal profile. Relative to the lower dental border.  
 -- Receding (0)  
 -- Vertical (1)  
 -- Convex (2)
528. Mandible 3. Anterior view. Central part of the mental protuberance. [The "mental protuberance" (Johnston & Willis, 1954), the "mental eminence" (Lieberman, 1995), the

- "mental osseum" (Brauer, 1984. Rosas, 1995), or the "tuber symphyseos" (Hublin & Tillier, 1981. Inke, 1967). Schwartz and Tattersall, 2000.]
- absent (0)
  - weak (1)
  - strong (2)
529. Mandible 4. Anterior view. Mental tubercle. [The mental protuberance may continue laterally on each side to some extent as a thickening of the inferior margin of the corpus. In some individuals, each lateral extremity of the mental protuberance may bear a blunt "corner", which has been referred to as a "mental tubercle" (Johnston & Willis, 1954. Ran, 1998) or "tubercula lateralia" (Hublin and Tillier, 1981. Inke, 1967). Schwartz and Tattersall, 2000.]
- absent (0)
  - weak (1)
  - strong (2)
530. Mandible 5. Anterior view. Mental trigon central keel. [The mental protuberance and lateral extremities were collectively called "mental trigon" (Rak, 1998). In the center of the mental trigon, it usually bears a vertical keel.]
- absent (0)
  - weak (1)
  - strong, crest-like (2)
531. Mandible 6. Anterior view. Mental fossa. [Above each lateral extremity and to each side of the mental protuberance, there is a depression.]
- absent (0)
  - shallow (1)
  - deep (2)
532. Mandible 7. Anterior view. Inferior marginal thickening
- absent (0)
  - present, thick (1)
  - present, very thick (2)
533. Mandible 8. Anterior view. Cleft indentation at the inferior margin of the symphysis. [Corresponding to the incompletely fused symphysis. (Schwartz and Tattersall, 2000). Also called incisura submentalis, referred to a semilunar space beneath the inferior rim of the symphysis (Mounier et al., 2009).]
- absent (0)
  - small (1)
  - large (2)
534. Mandible. Anterior view. Central tubercle at the inferior margin.
- Absent (0)
  - Present (1)
535. Mandible 9. Lateral view. Inferior marginal tubercle. [Usually lies under the large mental foramen. This tubercle is separate from the mental protuberance, and it is not a terminus or corner of the mental protuberance. It is not the mental tubercle. Tuberculus marginalis anterior in Mounier et al., 2009.]
- absent (0)
  - small (1)
  - large (2)
536. Mandible. Lateral view. Inferior marginal tubercle position. [Also called anterior marginal tubercle (illustrated in Antonio Rosas, 2001).]
- p3-p4 (0)
  - p4-m1 (1)
  - m1 (2)
537. Mandible 10. Ventral view, posterior view. Fossae digastrica.
- shallow (0)
  - deep (1)
538. Mandible 11. Ventral view, posterior view. Fossae digastrica medial crest. [Ridge between the fossae.]
- absent (0)
  - weak (1)
  - strong (2)
539. Mandible 12. Ventral view, posterior view.

- Fossae digastrica orientation.
- Downward (0)
  - Downward-backward (1)
  - Backward (2)
540. Mandible 13. Lateral view. Depth at the symphysis vs. the depth at the posterior margin of m2.
- symphysis deeper (0)
  - sub equal (1)
  - symphysis shallower (2)
541. Mandible 14. Lateral view. Foramen mentale number.
- Single (0)
  - multiple (1)
542. Mandible 15. Lateral view. Foramen mentale position.
- p3-p4 (0)
  - p4-m1 (1)
  - m1 (2)
543. Mandible 16. Lateral view. Superoinferior position of the mental foramen
- Inferior (0)
  - middle (1)
  - superior (2)
544. Mandible 17. Lateral view. Sulcus intertoralis [The hollowed area posterior to the mental foramen surrounded by the marginal tori. Mounier et al. (2009).]
- Flat surface (0)
  - Weak, mainly defined by one torus (1)
  - well defined, by two marginal tori (2)
545. Mandible 18. Lateral view. Torus marginalis superis relief.
- absent or weak (0)
  - swelling, clearly visible (1)
546. Mandible 19. Lateral view. Torus marginalis inferius relief.
- absent or weak (0)
  - swelling, clearly visible (1)
547. Mandible 20. Lateral view. Prominentia lateralis relief.
- absent, flat surface (0)
  - weak swelling (1)
  - strong swelling (2)
548. Mandible 21. Lateral view. Prominentia lateralis position relative to the tooth loci. [Lateral prominence.]
- m1-m2 (0)
  - m2-m3 (1)
  - m3 (2)
549. Mandible 22. Lateral view. Retromolar space shielded by the ramus.
- completely shielded, shielding part of the last molar (0)
  - completely shielded, to the posterior margin of the last molar (1)
  - no shielding, large space visible (2)
550. Mandible 23. Superior view. Retromolar space.
- Absent or very small (0)
  - smaller than half of the m1 (1)
  - large, larger than half of the m1 (2)
  - large, larger than m1 (3)
551. Mandible 24. Superior view. Retromolar space orientation.
- horizontal (0)
  - inclined (1)
  - deeply inclined, near vertical (2)
552. Mandible 25. Superior view. Extramolar sulcus.
- absent (0)
  - narrow gutter (1)
  - large gutter (2)
553. Mandible 26. Lateral view. Crista ectocondyloidea. [A ridge extending inferiorly from the lateral side of the condyle.]
- Absent or very weak (0)
  - Present, short (1)
  - Present, long (2)
554. Mandible 27. Lateral view. Fossa subcondylea.
- absent, flat (0)
  - present, shallow (1)
  - present, deep (2)
555. Mandible 28. Lateral view. Masseter fossa.



- [Insertion area of the masseter muscle.]
- absent, flat (0)
  - present, shallow (1)
  - present, deep (2)
556. Mandible 29. Lateral view. Masseter tuberosity.
- weak (0)
  - strong (1)
557. Mandible 30. Lateral view. Gonion shape.
- broad curved (0)
  - acute curved (1)
558. Mandible 31. Lateral view. Mandibular notch (sigmoid notch) depth.
- very shallow (0)
  - shallow (1)
  - deep (2)
559. Mandible 32. Lateral view. Mandibular notch (sigmoid notch) length.
- very short (0)
  - short (1)
  - long (2)
560. Mandibular 33. Lateral view. Mandibular notch (sigmoid notch) shape. [In chimps, the lowest point is closer to the coronoid process. In modern humans, it is symmetric. In Neanderthals, it is closer to the condyle process.]
- Asymmetric, the lowest point is more anteriorly positioned, closer to the coronoid process (0)
  - symmetric, the lowest point is in the middle between coronoid process and the condyle process (1)
  - asymmetric, the lowest point is more posteriorly positioned, closer to the condyle process (2)
561. Mandibular 34. Lateral view. Coronoid process orientation. [In modern humans, it is near vertical. In early modern *Homo sapiens*, it is anteriorly projecting. In chimps and Neanderthals, it is posteriorly projecting.]
- posteriorly projecting (0)
  - anteriorly projecting (1)
  - vertically projecting (2)
562. Mandible 34. Lateral view. Condyle height relative to the coronoid.
- lower (0)
  - subequal (1)
  - higher (2)
563. Mandible. Anterior view. Canine pillar. [Absent in *Homo*, strong in *Pongo* and *Sivapithecus*. Moderate in *Gigantopithecus* and *Lufengpithecus*. Low in *Khoratpithecus*.]
- absent (0)
  - low (1)
  - moderate (2)
  - strong (3)
564. Mandible. Anterior view, lateral view. Canine alveolar size relative to the canine tooth root size. [In *Homo* and *Lufengpithecus*, the canine socket is much smaller than the canine tooth root.]
- Similar (0)
  - Smaller (1)
  - Canine socket very small (2)
565. Mandible 35. Superior view. Position of the junction between the mandibular notch and the condyle articular surface. [Medial-lateral position of intersection between mandibular notch and condyle. In medially positioned intersection, the condyle is laterally expanded (Antonio Rosas, 2001).]
- Lateral (0)
  - Medial (1)
566. Mandible 36. Medial view. Internal coronoid pillar.
- weak (0)
  - strong (1)
567. Mandible 37. Medial view. Internal coronoid pillar orientation.
- near vertical (0)
  - oblique (1)
568. Mandible 38. Medial view. Pterygoid fovea. [Pit



- on the front of the neck of the mandible for the attachment of the lateral pterygoid muscle.]
- small (0)
  - large (1)
569. Mandible 39. Medial view. Crista endocondyloidea. [A ridge extends inferiorly from the condyle tip.]
- absent or very weak (0)
  - strong ridge (1)
570. Mandible 40. Medial view. Crista endocondyloidea orientation.
- inclined (0)
  - strongly inclined (1)
571. Mandible 41. Medial view. Planum triangulare size. [The concave space between the internal coronoid pillar and the crest endocondyloidea.]
- weakly developed (0)
  - intermediate (1)
  - strongly developed (2)
572. Mandible 42. Medial view. Planum triangulare depth.
- flat (0)
  - shallow (1)
  - deep (2)
573. Mandible 43. Posterior view. Mandibular foramen shape. [Opening on the inner aspect of the mandibular ramus, leading to the mandibular canal.]
- oval (0)
  - round (1)
574. Mandible 44. Medial view. Lingula of the mandible [Bony projection medial to the mandibular foramen. Attachment site of the sphenomandibular ligament.]
- small projection (0)
  - large projection (1)
575. Mandible 45. Medial view. Mylohyoid groove. [The groove extends forward and downward from the mandibular foramen and housing the mylohyoid nerve and the mylohyoid branch of the inferior alveolar artery.]
- present (0)
  - absent (1)
576. Mandible 46. Medial view. Mylohyoid groove bony bridge.
- absent (0)
  - present (1)
577. Mandible 47. Medial view. Pterygoid fossa.
- shallow (0)
  - deep (1)
578. Mandible 48. Medial view. Pterygoid tuberosity. [Roughened area present on the internal surface near the angle of the mandible. Attachment site of the medial pterygoid muscle.]
- absent or weak (0)
  - strong (1)
579. Mandible 49. Medial view. Mylohyoid line. [Oblique ridge extending from the posterosuperior to anteroinferior aspect of the body of the mandible. Origin of the mylohyoid muscle. Its posterior end is the origin place of the mylopharyngeal part of the superior pharynx constrictor.]
- weak (0)
  - strong (1)
580. Mandible 50. Medial view. Mylohyoid line orientation. [Relatively to the alveolus line.]
- Near parallel (0)
  - Inclined (1)
  - Very inclined (2)
581. Mandible 51. Medial view. Mylohyoid line position at the m3 level.
- low (0)
  - intermediate (1)
  - high (2)
582. Mandible 52. Superior view, medial view. Symphysis planum alveolare (simian shelf).
- absent (0)
  - present, small (1)
  - present, large (2)
583. Mandible 53. Medial view. Fossae genioglossus. [Excavated area delineated by the transverse

- tori.]  
 -- flat surface (0)  
 -- weak, mainly defined by one torus (1)  
 -- well defined by two tori (2)
584. Mandible 54. Medial view. Fossae genioglossus. Torus transversus superius.  
 -- weak or absent (0)  
 -- swelling clearly visible (1)
585. Mandible 55. Medial view. Fossae genioglossus. Torus transversus inferius.  
 -- weak or absent (0)  
 -- swelling clearly visible (1)
586. Mandible 56. Medial view. Sublingual fovea. [Depression for the sublingual gland on the anterior part of the mandible above the mylohyoid line.]  
 -- shallow (0)  
 -- deep (1)
587. Mandible 57. Medial view. Submandibular fovea. [Depression for the submandibular gland on the posterior half of the mandible body below the mylohyoid line.]  
 -- shallow (0)  
 -- deep (1)
588. Mandible 58. Medial view. Medial pterygoid tubercle. [Present in chimps. A tubercle between the condyle and angular process. Weak in modern humans.]  
 -- Absent or very weak (0)  
 -- Small (1)  
 -- Large (2)
589. Mandible. Ventral view. Corpus ventral edge below m2-3 [In modern Homo, the ventral edge of the mandible is thin.]  
 -- rounded and thick (0)  
 -- thin, v-shaped in cross section (1)
590. Upper incisor. I1. Labial side dentine wrinkles. [In relation to the labial dentine wrinkles, particularly to the state of strong, the labial enamel surface usually has several vertical grooves (as in the Hexian fossil).]  
 -- absent (0)  
 -- present, weak (1)  
 -- present, strong (2)
591. Upper incisor. I1. Lingual side dentine wrinkles.  
 -- absent (0)  
 -- present, weak (1)  
 -- present, strong (2)
592. Upper incisor. I1. Interruption groove on mesiolingual marginal ridge.  
 -- absent (0)  
 -- present, one (1)  
 -- present, more than one (2)
593. Upper incisor. I1. Interruption groove on distolingual marginal ridge  
 -- absent (0)  
 -- present, one (1)  
 -- present, more than one (2)
594. Upper incisor. I1. Interruption groove on medial aspect of basal cingulum.  
 -- absent (0)  
 -- present, limited to the tooth crown (1)  
 -- present, long and deep, extends to the root (2)
595. Upper incisor. I2. Interruption groove on mesiolingual marginal ridge  
 -- absent (0)  
 -- present, one (1)  
 -- present, more than one (2)
596. Upper incisor. I2. Interruption groove on distolingual marginal ridge.  
 -- absent (0)  
 -- present, one (1)  
 -- present, more than one (2)
597. Upper incisor. I2. Interruption groove on medial aspect of the basal cingulum.  
 -- absent (0)  
 -- present, limited to the tooth crown (1)  
 -- present, long and deep, extends to the root (2)
598. Upper incisor. I2. Shape  
 -- Classic shovel shape. (0)  
 -- Triangular shovel shape. (1)
599. Upper canine. Lingual central ridge.

- absent (0)
  - present, weak (1)
  - present, strong (2)
600. Upper canine. Form.
- flared, "taloid"-like marginal ridges (0)
  - incisor-like (1)
601. Upper P3. Mesial accessory cuspule. UP3AC [A small cusp on the mesial marginal ridge, between protocone and paracone.]
- absent (0)
  - present, small (1)
  - present, large (2)
602. Upper P3. Distal accessory cuspule. UP3AC
- absent (0)
  - present, small (1)
  - present, large (2)
603. Upper P3. Buccal tooth crown dorsal expansion.
- absent, tooth neck on lingual and buccal sides are similar high (0)
  - buccal side dorsally expanded (1)
  - buccal side dorsally expanded in large amount (2)
604. Upper P3. Buccal vertical ridge on paracone. [A central ridge delimited by mesial and distal depressions.]
- absent (0)
  - present, weak (1)
  - present, strong (2)
605. Upper P3. Tooth root number.
- Three. (0)
  - Two. (1)
  - Two, partially fused. (2)
  - One. (3)
606. Upper P4. Mesial accessory cuspule. UP4AC
- absent (0)
  - present, small (1)
  - present, large (2)
607. Upper P4. Distal accessory cuspule. UP4AC
- absent (0)
  - present, small (1)
  - present, large (2)
608. Upper P4. Buccal vertical ridge on paracone.
- absent (0)
  - present, weak (1)
  - present, strong (2)
609. Upper P4. Tooth root number.
- Three. (0)
  - Two. (1)
  - Two, partially fused. (2)
  - One. (3)
610. Upper M1. Crista obliqua. [A crest between the tip of the protocone and the tip of the metacone. Wood, B. A. & Engleman, C. A. Analysis of the dental morphology of Plio-Pleistocene hominids. V. Maxillary postcanine tooth morphology. *J. Anat.* 161, 1-35 (1988).]
- Complete, high (0)
  - Complete, low (1)
  - Incomplete (2)
  - Absent (3)
611. Upper M2. Crista obliqua. [A crest between the tip of the protocone and the tip of the metacone. Wood, B. A. & Engleman, C. A. Analysis of the dental morphology of Plio-Pleistocene hominids. V. Maxillary postcanine tooth morphology. *J. Anat.* 161, 1-35 (1988).]
- Complete, high (0)
  - Complete, low (1)
  - Incomplete (2)
  - Absent (3)
612. Upper M3. Crista obliqua. [A crest between the tip of the protocone and the tip of the metacone. Wood, B. A. & Engleman, C. A. Analysis of the dental morphology of Plio-Pleistocene hominids. V. Maxillary postcanine tooth morphology. *J. Anat.* 161, 1-35 (1988).]
- Complete, high (0)
  - Complete, low (1)
  - Incomplete (2)
  - Absent (3)
613. Upper M3. Reduction
- M3 as large as M2, or slightly smaller, or

- slightly larger (0)  
 -- M3 present, larger than half of M2. (1)  
 -- M3 present, but much smaller than M2, or absent in one side. (2)  
 -- M3 absent. (3)
614. Lower p3. Occlusal view. Crown shape.  
 -- Asymmetrical (0)  
 -- Symmetrical (1)
615. Lower p3. Occlusal view. Distolingual talonid.  
 -- Large (0)  
 -- Small (1)  
 -- Absent (2)
616. Lower p3. Occlusal view. Transverse crest between protoconid and metaconid.  
 -- Absent (0)  
 -- Present, incomplete (1)  
 -- Present, complete (2)
617. Lower p3. Root number.  
 -- Two (0)  
 -- Two, partially fused (1)  
 -- One (2)
618. Lower p3. Grooves on the mesial and distal sides of the root.  
 -- Absent (0)  
 -- Shallow (1)  
 -- Deep (2)
619. Lower p4. Occlusal view. Crown shape.  
 -- Asymmetrical (0)  
 -- Symmetrical (1)
620. Lower p4. Occlusal view. Distalingual talonid.  
 -- Large (0)  
 -- Small (1)  
 -- Absent (2)
621. Lower p4. Occlusal view. Transverse crest between Protoconid and metaconid.  
 -- Absent (0)  
 -- Present, incomplete (1)  
 -- Present, complete (2)
622. Lower p4. Root number.  
 -- Two (0)  
 -- Two, partially fused (1)
- One (2)
623. Lower p4. Grooves on the mesial and distal sides of the root.  
 -- Absent (0)  
 -- Shallow (1)  
 -- Deep (2)
624. Lower m1. Groove pattern. LM1GP [Referring the relationship between the four main tooth cusps as indicated by the grooves that separate them.]  
 -- Y groove. The metaconid and hypoconid meet at a groove, and the protoconid and entoconid do not meet. (0)  
 -- + groove. Protoconid, metaconid, hypoconid and entoconid touch at the center of the tooth so that the primary grooves form a plus sign. (1)  
 -- X groove. The protoconid and the entoconid meet at a groove, and the metaconid and hypoconid do not meet. (2)
625. Lower m1. Trigonid crest. LM1TC [There is a ridge that interrupts the groove separating the protoconid and metaconid.]  
 -- absent. (0)  
 -- present. (1)
626. Lower m1. Hypoconulid.  
 -- absent. (0)  
 -- present one. (1)  
 -- present two. (2)  
 -- present three or more. (3)
627. Lower m2. Groove pattern. LM2GP  
 -- Y groove. The metaconid and hypoconid meet at a groove, and the protoconid and entoconid do not meet. (0)  
 -- + groove. Protoconid, metaconid, hypoconid and entoconid touch at the center of the tooth so that the primary grooves form a plus sign. (1)  
 -- X groove. The protoconid and the entoconid meet at a groove, and the metaconid and hypoconid do not meet. (2)
628. Lower m2. Trigonid crest. LM2TC  
 -- absent. (0)

- |                                                                                                                                                                                                                                                                                                                                                                                                                                                                                                        |                                                                                                                                                                                                                                                                                                                                                                                                                                                                                                              |
|--------------------------------------------------------------------------------------------------------------------------------------------------------------------------------------------------------------------------------------------------------------------------------------------------------------------------------------------------------------------------------------------------------------------------------------------------------------------------------------------------------|--------------------------------------------------------------------------------------------------------------------------------------------------------------------------------------------------------------------------------------------------------------------------------------------------------------------------------------------------------------------------------------------------------------------------------------------------------------------------------------------------------------|
| <p>629. Lower m2. Hypoconulid.<br/> -- present. (1)<br/> -- absent. (0)<br/> -- present one. (1)<br/> -- present two. (2)<br/> -- present three or more. (3)</p> <p>630. Lower m3. Reduction<br/> -- m3 present, in normal size. (0)<br/> -- m3 present, but much smaller than m2, or absent in one side. (1)<br/> -- m3 absent. (2)</p> <p>631. Lower m3. Groove pattern. LM3GP<br/> -- Y groove. The metaconid and hypoconid meet at a groove, and the protoconid and entoconid do not meet. (0)</p> | <p>-- + groove. Protoconid, metaconid, hypoconid and entoconid touch at the center of the tooth so that the primary grooves form a plus sign. (1)<br/> -- X groove. The protoconid and the entoconid meet at a groove, and the metaconid and hypoconid do not meet. (2)</p> <p>632. Lower m3. Trigonid crest. LM3TC<br/> -- absent. (0)<br/> -- present. (1)</p> <p>633. Lower m3. Hypoconulid.<br/> -- absent. (0)<br/> -- present one. (1)<br/> -- present two. (2)<br/> -- present three or more. (3)</p> |
|--------------------------------------------------------------------------------------------------------------------------------------------------------------------------------------------------------------------------------------------------------------------------------------------------------------------------------------------------------------------------------------------------------------------------------------------------------------------------------------------------------|--------------------------------------------------------------------------------------------------------------------------------------------------------------------------------------------------------------------------------------------------------------------------------------------------------------------------------------------------------------------------------------------------------------------------------------------------------------------------------------------------------------|

**Appendix 3. Data matrix in TNT format for phylogenetic analysis**

nstates num 32;  
xread  
634 55

&[cont]

Habilis\_OH7\_OH24\_ER1805 0.0478 0.1400 0.1748 0.1963 0.1195 0.8091 1.0000 0.4404 0.4447 0.3726 0.2813  
0.0000 0.0000 0.2774 0.2826 0.4601 0.5498 0.3870 0.4207 0.4550 0.3444 ? 0.9071 0.5119 0.4016 0.3626 0.6787  
0.4792 0.4864 0.2371 0.5212 0.6100 0.6383 0.3125 0.5759 0.2198 0.3589 0.4846 0.6035 0.7360 0.7812 0.5978  
0.5072 0.3902 0.1093 0.2747 0.8628 0.7485 0.7657 0.4398 0.0812 0.7842 0.4370 0.5133 0.8273 0.3057 0.9067  
0.2433 0.0945 0.1160 0.6154 0.2571 0.5402 0.2615 0.3201 0.4480 0.1412 0.4964 0.4827 0.5944 0.8384 0.5906  
0.7700 0.1422 0.7888 0.1076 0.3860 0.7310 0.7208 0.3973 0.8960 0.7121 0.4928 ? 0.2858 0.5463 0.5976 0.1967  
0.1905 0.5306 0.5499 0.2358 0.2429 0.2364 0.4174 0.2777 0.4145 0.3243 0.3596 0.6168 0.2898 0.1463 0.2571  
0.2887 0.1474 0.4508 0.5525 0.4539 0.6166 0.5184 0.7373 0.6231 0.5092 0.6396 0.6801 0.7027 0.3408 0.4910  
0.6227 0.7166 0.8645 0.5771 0.4659 0.8272 0.6402 0.0662 0.8768 0.3301 0.5628 0.4881 0.3483 0.3099 0.8084  
0.6658 ? 0.5142 0.2040 0.4543 0.6999 0.9068 ? ? ? ? ? ? ? ? ? ? 0.2032 ? ? 0.7281 ? 1.0000 0.8415 ? ? 0.5666  
0.4248 0.9073 ? ? 0.2078 0.8687 ? 1.0000 0.6152 0.8416 0.6512 0.5902 0.7369 0.3755 0.6524 0.2718 0.0314  
0.2027 0.2891 0.9894 0.5905 0.9358 0.8295 0.8520 1.0000 0.6537 0.9491 0.5472 1.0000 0.4930 0.6265 0.5582  
0.0931 0.0000 0.4000 0.0000 0.5000 0.5058 0.0501 0.0343 0.1907 0.5000 0.0000 0.0000 0.0000 0.0000 0.6605  
0.9359 0.0437 0.0000 0.2000 0.4000 ? 0.8072 0.6646 0.5234 0.4074 0.4000 0.6000 0.7992 0.7414 0.5224 0.3816  
0.2500 0.7500 0.9261 0.7070 0.1192 0.8333 0.7857 0.5000 0.0000 0.6667 0.5000 0.8336 0.7244 0.4734 0.4286  
0.7000 0.6667 1.0000 0.0000 1.0000 0.5000 0.6349 0.6418 0.1077 0.4656 0.6500 0.7500 0.8333 0.4000 0.0000  
0.5000 1.0000 0.4816 0.0000 0.1216 1.0000 1.0000 1.0000 0.2832 0.9390 0.3081 0.8000 1.0000 1.0000 0.5075  
0.4675 0.6000 1.0000 1.0000 0.4229 0.6169 0.0000 1.0000 1.0000 0.1233 0.9899 0.3333 0.8109 0.7076 0.2854  
0.5000 1.0000 0.2500 0.8333 0.6000 0.7073 0.7612 0.3916 0.6357 1.0000 0.6667 0.4444 0.6000 0.3333 0.8964































0.3391 0.3992 0.7292 0.2585 0.5623 1.0000 ? 0.5690 ? 0.1889 ? ? ? 0.2558 0.5072 0.7617 0.4296 0.7640 0.3425  
0.6885 ? 0.8303 ? 0.5406 0.7407 0.7335 0.5713 0.6387 0.5522 0.8170 0.2374 0.2635 0.0517 0.1797 0.1810 0.1583  
Saccopastore\_I\_II 0.5672 0.1854 0.2590 0.2574 0.4933 0.2895 0.4100 0.1472 0.1641 0.1867 0.2054 0.2823  
0.3251 0.3778 0.2687 0.3427 0.2971 0.2860 0.4743 0.7122 0.7584 0.6750 0.6928 0.8110 0.2545 0.2905 0.3429  
0.4491 0.6862 0.2743 0.1975 0.2126 0.4484 0.2301 0.2469 0.4887 0.4721 0.2861 0.0060 0.5115 0.5336 0.3464  
0.5610 0.5244 0.4326 0.5797 0.4454 0.5956 0.4899 0.4185 0.6085 0.6492 0.4352 0.4066 0.4243 0.4013 0.5576  
0.4239 0.5118 0.5360 0.5110 0.6989 0.5232 0.6923 0.0638 0.4773 0.4471 0.1962 0.0949 0.1446 0.2308 0.5486  
0.2336 0.3551 0.3404 0.3415 0.7218 0.2249 0.5375 0.4651 0.3834 0.2564 0.4485 ? 0.2570 0.6252 0.6148 0.8376  
0.8995 0.7869 0.6435 0.4494 0.4702 0.3901 0.2923 0.3984 0.3859 0.0743 0.6952 0.6081 0.2307 0.7476 0.9040  
0.2872 0.9208 0.3655 0.7697 0.7237 0.3860 0.4013 0.7513 0.5132 0.7552 0.8050 0.3738 0.3174 0.5663 0.5924  
0.3562 0.3699 0.4338 0.2955 0.5189 0.8874 0.1047 0.2450 0.1813 0.6247 0.3896 0.2118 0.6205 0.4034 0.7927  
0.4725 0.4291 0.6485 0.2433 0.4130 0.2970  
0.1963 ? ? ? ? ? ? ? ? ? ? ? ? ? ? ? ? ? ? ? ? ? ? ? ? ? ? ? ? ? ? ? ? ? ? ? ? ? ? ? ? ? ? ? ? ? ? ? ? ? ?  
1.0000 ? ? ? ? ? ? ? ? ? ? ? ? ? ? ? ? ? ? ? ? ? ? ? ? ? ? ? ? ? ? ? ? ? ? ? ? ? ? ? ? ? ? ? ? ? ? ? ? ? ?  
0.7120 0.2207 ? ? 0.4634 0.1732 0.3679 0.5000 0.4286 0.4000 0.0000 0.0000 0.0000 0.1490 0.1338 0.7494 0.0811  
0.3500 0.5000 0.8000 0.0000 0.0000 0.0000 0.1450 0.1873 0.3526 0.2564 0.1500 0.1667 0.0000 0.0000 0.0000  
0.0000 ? ? ? ? ? ? ? ? ? ? ? ? ? ? ? ? ? ? ? ? ? ? ? ? ? ? ? ? ? ? ? ? ? ? ? ? ? ? ? ? ? ? ? ? ? ? ? ? ? ?  
0.7257 ? ? ? ? ? ? ? ? ? ? 0.5012 0.7398 0.8281 0.3049 0.5942 0.4544 0.1566 0.8894 0.2034 0.2955 0.5360 0.6247  
0.4503 1.0000 0.2658 0.1858 0.3075 0.3025 0.2768 0.5992 0.7758 0.2315 0.9558 1.0000 0.4119 0.8499 0.4860  
0.1327 0.3712 0.0421 0.6667 0.4778 0.2783 1.0000 0.4810 0.5778 0.6709 0.2935 0.4405 0.2139 0.4637 0.2718  
0.3375 0.5013 0.4927 0.9357 0.5857 0.9332 0.6096 0.4371 0.4304 0.3306  
0.2104 ? ? ? ? ? ? ? ? ? ? ? ? ? ? ? ? ? ? ? ? ? ? ? ? ? ? ? ? ? ? ? ? ? ? ? ? ? ? ? ? ? ? ? ? ? ? ? ? ? ?  
Neanderthalensis\_type 0.6249 0.3763 0.4014 0.4910 ? 0.5388 0.5103 ? ? ? ? ? ? ? ? ? ? 0.0678 ? 0.4292 ? 0.7820 ?  
0.6043 0.7498 ? ? 0.0000 ? ? ? ? ? ? ? ? ? ? ? ? ? ? ? ? ? ? ? ? ? ? ? ? ? ? ? ? ? ? ? ? ? ? ? ? ? ? ? ? ? ? ? ?  
0.0000 0.5699 0.5739 ? 0.2598 0.4578 ? ? ? ? 0.4094 0.4160 0.6154 ? 0.4551 ? ? ? ? ? ? 0.5278 0.4739 ? ? ? ? ? ? ? ? ?  
0.1801 ? ? 0.6854 ? ? 0.3457 0.4090 0.5879 0.7037 0.3431 ? 0.4245 0.4045 0.3241 ? ? ? ? ? ? ? ? ? ? ? ? ? ? 0.4470  
0.4274 ? ? ? ? ? 0.4762 ? ? ? ? ? ? ? ? ? ? ? ? ? ? ? ? ? ? ? ? ? ? ? ? ? ? ? ? ? ? ? ? ? ? ? ? ? ? ? ? ? ? ? ? ?  
0.4455 ? ? ? ? ? ? ? ? ? ? ? ? ? ? ? ? ? ? ? ? ? ? ? ? ? ? ? ? ? ? ? ? ? ? ? ? ? ? ? ? ? ? ? ? ? ? ? ? ? ? ? ? ? ? ? ? ?  
? ? ? ? ? ? ? ? ? ? ? ? ? ? ? ? ? ? ? ? ? ? ? ? ? ? ? ? ? ? ? ? ? ? ? ? ? ? ? ? ? ? ? ? ? ? ? ? ? ? ? ? ? ? ? ? ?  
? ? ? ? ? ? ? ? ? ? ? ? ? ? ? ? ? ? ? ? ? ? ? ? ? ? ? ? ? ? ? ? ? ? ? ? ? ? ? ? ? ? ? ? ? ? ? ? ? ? ? ? ? ? ? ? ?  
0.8170 0.8107 0.6344 ? ? ? ? ? ? ? ? ? ? 0.4682 0.2655 1.0000 ? 0.1810 0.3951 ? ? ? ? ? ? 0.5041 0.4102 0.1253  
0.3203 ? ? ? ? ? ? 0.3877 ? ? ? ? ? ? ? ? ? ? ? ? ? ? ? ? ? ? ? ? ? ? ? ? ? ? ? ? ? ? ? ? ? ? ? ? ? ? ? ? ? ? ? ?  
Xiahe  
? ? ? ? ? ? ? ? ? ? ? ? ? ? ? ? ? ? ? ? ? ? ? ? ? ? ? ? ? ? ? ? ? ? ? ? ? ? ? ? ? ? ? ? ? ? ? ? ? ? ? ? ? ? ? ? ?  
? ? ? ? ? ? ? ? ? ? ? ? ? ? ? ? ? ? ? ? ? ? ? ? ? ? ? ? ? ? ? ? ? ? ? ? ? ? ? ? ? ? ? ? ? ? ? ? ? ? ? ? ? ? ? ? ?  
? ? ? ? ? ? ? ? ? ? 0.2735 ? ? ? ? ? ? ? ? ? ? 0.1016 0.1448 0.1792 0.2467 ? 0.1686 0.4416 0.5578 0.5278 0.5326 0.3574  
0.9343 ? ? 0.6588 0.8305 ? 0.7293 0.8670 0.6817 0.5798 0.6519 0.7922 ? 0.9614 0.7065 0.7014 0.4708 0.5665  
0.5822 0.5472 0.4275 0.5379 0.5681 0.7112 0.4426 0.3695 0.3228  
0.1806 ? ? ? ? ? ? ? ? ? ? ? ? ? ? ? ? ? ? ? ? ? ? ? ? ? ? ? ? ? ? ? ? ? ? ? ? ? ? ? ? ? ? ? ? ? ? ? ? ? ? ? ? ? ? ? ?  
? ? ? ? ? ? ? ? ? ? ? ? ? ? ? ? ? ? ? ? ? ? ? ? ? ? ? ? ? ? ? ? ? ? ? ? ? ? ? ? ? ? ? ? ? ? ? ? ? ? ? ? ? ? ? ? ?  
0.6501 0.6014 0.5000 1.0000 0.0000 0.1111 1.0000



0.8330 0.7997 0.5585 0.6148 0.6525 0.5051 0.5062 0.3523 0.0270 0.6977 0.3808 0.1150 0.6329 0.3507 0.1556  
0.7595 0.3419 0.3803 0.8671 0.6939 1.0000 0.8670 0.5031 0.7516 0.6615 0.5170 0.5609 0.3961 0.5248 0.9701  
0.8380 0.8005 0.3981 0.0000 0.7116 0.2033 0.2064 0.2630 0.7228 0.5397 0.2493 0.5801 0.2975 0.6525 0.2814  
0.2370 0.1719 0.2825 0.6487 0.5956  
0.3619 ?????????????????????????????????????????????????????????????????????????????????????  
????????????????????????????????????????????????????????????????????????????????????  
1.0000 ?????????????????????????????????????????????????????????????????????????????????????  
????????????????????????????????????????????????????????????????????????????????????  
????????????????????????????????????????????????????????????????????????????????????  
0.4009 0.3546 0.3311 0.0000 0.3990 0.5611 0.2820 0.2579 0.7774 0.2149 0.1794 0.1817 0.2569 0.6845 0.6546  
0.1515 0.4025 0.1271 0.2261 0.1668 0.1942 0.5919 0.1537 0.0703 0.3204 0.3937 0.2705 0.2780 0.4009 0.1929  
0.0000 0.0000 0.0000 0.8886 0.3012 0.7786 0.2459 0.4729 0.4855 0.3433  
0.4282 ?????????????????????????????????????????????????????????????????????????????????????  
Jinniushan 0.6661 0.4178 0.3676 0.3490 0.3021 0.5204 0.4572 0.3592 0.3843 0.3927 0.3616 0.0916 0.3917  
0.3476 1.0000 0.2620 0.4420 0.3188 0.3535 0.4892 0.8067 0.4792 0.7204 0.8231 0.3347 0.2662 0.5362 0.5018  
0.5743 0.2175 0.4310 0.3642 0.1866 0.4606 0.1603 0.3089 0.3201 0.3262 0.2028 0.4795 0.5469 0.3799 0.4777  
0.4512 0.2744 0.5988 0.6654 0.3383 0.5376 0.2799 0.5446 0.0000 0.2933 0.4605 0.0905 0.5573 0.1580 0.7005  
0.4764 0.4400 0.5824 0.2418 0.3684 0.4000 0.2773 0.4112 0.6306 0.3542 0.5314 0.4498 0.1479 0.6194 0.2064  
0.3956 0.4536 0.3119 0.1448 0.1764 0.1672 0.4968 0.2488 0.4234 0.4774 ? 0.0617 0.5228 0.6532 0.5969 0.6190  
0.6370 0.6122 0.3668 0.5144 0.3180 0.3164 0.3819 0.4099 0.3446 0.7591 0.2979 0.2228 0.7266 0.7346 0.2593  
0.8358 0.3159 0.4680 1.0000 0.3296 0.6796 0.5525 0.3296 0.3428 0.4259 0.1837 0.3665 0.2078 0.4151 0.3424  
0.3771 0.4164 0.1139 0.3295 0.7874 0.3496 0.1625 0.4408 0.7717 0.2808 0.1008 0.8132 0.2814 0.4417 0.3403  
0.1767 0.2488 0.1805 0.3131 0.3578  
0.2089 ?????????????????????????????????????????????????????????????????????????????????????  
0.5252 0.2857 0.4000 0.0000 0.0000 0.5582 0.4851 0.3405 0.0000 0.5000 0.3750 0.0000 0.0000 0.4093 0.1842  
0.5949 0.3450 0.2000 1.0000 0.8000 0.0000 0.3507 0.1802 0.3081 0.4245 0.0000 0.6000 0.3107 0.2026 0.3649  
0.3245 0.0000 0.3750 0.4846 0.2131 0.3769 0.0000 0.5714 0.3000 0.1538 0.6667 0.0000 0.2719 0.1509 0.4922  
0.1974 0.2000 0.5000 0.8000 0.0000 0.0000 1.0000 0.0689 0.0878 0.3220 0.0874 0.1000 0.2500 0.3333 0.0000  
0.0000  
0.0000 ?????????????????????????????????????????????????????????????????????????????????????  
?? 0.1965 0.7820 0.8259 0.4986 0.8040 0.5804 0.3702 0.2086 0.2137 0.1161 0.7552 0.2577 0.4177 0.2327 0.2431  
0.5344 0.0792 0.2080 0.4262 0.3369 0.4815 0.4926 0.4003 0.4656 0.0000 0.6848 0.4808 0.1604 0.5590 0.1700  
0.2830 0.1979 0.4194 0.7073 0.2300 0.2407 0.2834 0.4320 0.1536 0.0000 0.1677 0.2342 0.4043 0.5004 0.3593  
0.9056 0.2399 0.4753 0.3276 0.2842 0.3555 0.2149 0.2599 ?????????????????????????????????????????  
Maba 0.5951 0.3637 0.3077 ?? 0.3474 0.3274 ?????????????????????????????????????????????????????  
0.8223 ?????????????????????????????????????????????????????????????????????????????????????  
0.6425 ?????????????????????????????????????????????????????????????????????????????????????  
0.5121 0.6243 0.3621 0.3061 0.4533 0.3351 0.4011 ? 0.1437 ?? 0.5880 ?????????????????????????????  
0.7159 ? 0.4019 ?????????????????????????????????????????????????????????????????????????????  
0.4464 ?????????????????????????????????????????????????????????????????????????????????????  
????????????????????????????????????????????????????????????????????????????????????  
????????????????????????????????????????????????????????????????????????????????????  
???????????????????????????????????????????????????????????????????????????????????? 0.7495

0.9373 0.5282 ??????? 0.4662 0.1305 ? 0.1440 0.3996 ?????? 0.5014 0.4594 0.1340 0.2009  
 0.1515 ????? 0.0539 0.5734 ?????????????????????????????????????????  
 Xuchang 0.9897 0.3261 0.3472 0.4765 ? 0.0000 0.0000 0.3392 0.4057 0.3444 0.3549 ????? 0.6129 0.6863 0.6349  
 0.6927 0.3669 0.8557 ? 0.7265 0.9925 0.6468 0.5501 0.5209 ????? 0.2129 0.2921 0.0912 0.3423 0.6140 0.4663  
 0.2632 0.5812 ? 0.0000 0.3863 0.3492 0.3640 0.5061 0.3837 0.5315 0.5330 0.6153 0.5675 0.5786 0.5166 ? 0.8525  
 0.9421 ????? 0.5866 0.5280 0.5440 ? 0.6997 ? 0.2011 0.2359 0.3600 0.0508 0.2915 0.2430 ?????? 0.3704 ??  
 0.5285 ?? 1.0000 ?? 0.5114 0.3853 0.2312 0.2751 0.5093 ? 0.4525  
 0.4293 ?????????????????????????????????????????????????????????  
 0.1692 ?????????????????????????????????????????????????????????  
 ?????????????????????????????????????????????????????????????  
 ?????????????????????????????????????????????????????????????  
 ?????????????????????????????????????????????????????????????  
 0.7078 0.8363 1.0000  
 0.0000 0.5097 ?????? 0.4484 0.2209 0.1952 0.3084 0.1288 0.2146 ? 0.5885 0.1984 ? 0.3981 0.1594 ??? 0.7419  
 0.4670 ? 0.3172 ?????????????????????????????????????????????????????  
 Mauer\_1  
 ?????????????????????????????????????????????????????????????  
 ?????????????????????????????????????????????????????????????  
 ??????????? 0.3414 0.7635 0.3067 0.5603 0.5484 1.0000 0.1700 0.3640 1.0000 0.9066 0.8038 0.2460 0.1955  
 0.3208 0.1929 0.3141 0.0000 0.2409 0.4560 0.4668 0.6185 0.6329 0.9507 0.6751 0.3467 0.9155 0.8617 0.1399  
 0.1315 0.0681 0.1988 0.1459 0.1334 0.6080 0.0000 0.5866 0.2834 0.2962 0.3284 0.4368 0.5743 0.4711 0.3898  
 0.3335 0.3326 0.3580 0.1558 0.6835 0.1867  
 0.1964 ?????????????????????????????????????????????????????????  
 ?? 0.1340 0.3175 0.8342 0.5991 0.0000 0.0154 0.1701 1.0000 0.0000 0.1919 0.0000 0.3399 0.0917 0.7216 0.5130  
 0.1000 0.2053 0.2109 0.4322 0.9353 0.1111 0.1894 0.1094 0.2116 0.6212 0.1111 0.0657 0.1217 0.7983 0.2500  
 0.3333 0.1667 0.0000 0.4000 0.1720 0.2738 0.4825 1.0000 0.2500 0.3333 0.1111 0.0000 1.0000 0.2281 0.1989  
 0.6755 0.7802 1.0000 0.5000 0.2857 0.0000  
 0.0000 ?????????????????????????????????????????????????????????  
 ??? 0.5913 0.6207 0.7246 0.1485 0.2903 0.2567 0.9157 1.0000 1.0000 1.0000 0.7835 0.3628 0.7365 ? 0.8861  
 0.8693 0.8242 0.6000 0.6284 0.3320 0.6945 0.2970 0.1455 0.1662 0.1086 0.0361 0.5070  
 Arago\_II\_XIII\_XXI\_XLVII 0.4786 0.4230 0.4143 ? 0.4533 0.3938 0.3274 0.4156 0.4486 0.5352 0.5357 ???  
 0.3443 0.5251 ? 0.4751 ? 0.8281 0.6042 0.4040 0.7315 ?? 0.4576 0.2816 ?????? 0.3964 0.3467 ?? 0.4049  
 0.4310 0.2346 0.2947 0.2683 0.3256 0.5932 0.6653 0.9765 ? 0.7329 0.5393 ? 0.7642 0.6218 ??? 0.5906 0.5800  
 0.6978 ? 0.6192 ? 0.3493 0.1442 0.2494 0.0220 0.2790 0.1687 ?????? 0.6480 1.0000 ? 0.6808 ? 0.4438  
 0.5123 0.6065 0.4142 0.4339 0.5969 0.5599 0.3597 0.3441 0.3666 0.4650 0.3968 0.4678 0.4459 0.4601 0.5875  
 0.2291 0.3652 0.6896 0.2373 0.7757 0.3103 0.3594 0.7970 0.6670 0.5673 0.3536 0.3051 0.6553 0.7741 0.5164  
 0.5407 0.5411 0.6315 0.5140 0.5498 0.4917 0.4038 0.4470 0.8452 0.0142 0.3062 0.5664 0.5221 0.4078 0.2591  
 0.5563 0.2739 0.5460 0.4889 0.1666 0.4752 0.1816 0.7546 0.5077 0.7772 0.2958 0.3091 0.3393 0.4217 0.4511  
 0.2348 0.3649 0.3897 0.2234 0.4761 0.5358 0.4007 0.6358 0.6019 0.4452 0.9265 0.4010 0.3412 0.4827 0.4011  
 0.5965 0.4932 0.9471 0.9906 0.7134 0.7044 0.9444 0.4305 0.4829 0.5879 0.5659 0.6862 0.6221 0.8122 0.4318  
 0.8923 0.7851 0.8823 0.7512 0.8023 0.6523 0.6113 0.4955 0.4195 0.4215 0.5170 0.2608 0.6033 0.3289  
 0.2401 ????????????????????????????? 0.3230 0.2295 0.4649 0.3362 0.0000 0.0000 ?????? 0.5425  
 0.2405 0.2654 0.4444 0.2857 0.4000 0.0000 0.0000 0.4445 0.2643 0.3803 0.4510 0.3000 0.5000 0.5000



0.3388 0.5239 0.9535 0.2287 0.0000 0.5000 0.6424 0.5061 0.4385 0.3333 0.4286 0.4000 0.0000 1.0000 0.0000  
0.3642 0.4208 0.8226 0.1332 0.4000 0.5000 0.6000 0.0000 0.0000 0.0000 0.2769 0.4071 0.5193 0.2810 0.4000  
0.3333 0.0000 0.0000 0.1250  
0.0000 ?????????????????????????????????????????????????????????????????????????????????????  
?? 0.5515 0.9308 0.6956 0.6685 0.3092 0.3702 0.6259 0.5375 0.1623 0.2718 0.5969 ? 0.3696 0.2617 0.2017  
0.1824 0.2922 0.3712 0.4592 0.3447 0.8027 0.3345 0.0396 0.1798 0.2385 0.7047 0.8028 0.1006 0.1487 0.3331  
0.6970 0.5969 0.4180 0.9698 0.5321 0.5346 0.2577 0.3320 0.6208 0.7087 0.7508 0.2671 0.7236 0.7556 0.6473  
0.8855 0.3479 0.7372 0.6615 0.4691 0.3197 0.3085 0.3052 ?????????????????????????????????????  
Ceprano 0.5043 0.4917 0.5208 0.6082 0.4352 0.3095 0.1917 0.3658 0.3570 0.5069 0.4554 ??? 0.8137 0.6721  
0.8157 1.0000 0.3993 0.8242 0.3167 0.5856 0.8686 0.7151 0.7213 0.6848 1.0000 ?? 0.6337 0.6871 0.5495 0.2040  
0.6926 0.6435 0.8034 0.6587 ? 0.3470 0.6433 0.5922 0.2453 0.2317 0.2698 0.6810 0.5638 0.7957 0.7183 0.9017  
0.5925 ? 0.5203 0.7583 ??? ? 0.5236 0.5200 0.7143 ? 0.5913 ? 0.2580 0.3533 0.5506 0.3297 0.6395  
0.5181 ?????? 0.4515 0.5011 0.3598 0.7200 0.1882 ? 0.7342 ?? 0.7484 0.8092 0.6137 0.5873 0.7234 0.7841  
0.8696 0.5346 0.8214 0.7243 0.6200 ?? 0.0000 ?????? 0.5248 0.7313 0.5326  
0.6496 ?????????????????? 0.4171 ???????????  
1.0000 ?????????????????????????????????????????????????????????????????????????????????????  
????????????????????????????????????????????????????????????????????????????????????  
???????????????????????????????????????????????????????????????????????????????????? 0.7951 0.8797 0.9512  
0.4272 0.5493 0.7326 1.0000 ??? 0.6477 0.3305 0.3545 0.4452 0.1528 0.0996 ? 0.2994 0.3823 ? 0.4499 0.2289  
0.3189 0.2101 ? 0.8933 0.7776 0.0746 0.1026 0.3759 ?????? 0.2494 ?????????????? 1.0000  
0.8001 ?????????????????????????????????????????????????????????????  
Steinheim 0.4461 0.2633 0.1738 0.3540 0.4439 0.2630 0.3156 0.1772 0.2362 0.2618 0.2857 0.1472 ? 0.0398 ?  
0.0027 0.0000 0.0853 0.0009 0.4928 0.6601 0.8083 0.1644 0.6759 0.0000 0.0000 0.2525 0.0000 ? 0.0000 0.4368  
0.5031 0.3682 0.2940 0.0000 0.3516 0.5676 0.0000 0.0000 0.1910 0.3986 0.2765 0.5538 0.6585 0.4070 0.5639  
0.4321 0.6833 0.5243 0.3858 0.5659 ? 0.5620 0.5869 ??? ? 0.6063 0.5040 0.3764 ? 0.2755 ? 0.1991 0.6193 0.5812  
0.1887 0.2760 0.2651 0.2956 0.4959 0.3119 0.3008 0.1708 0.4510 0.3764 0.3096 0.5135 0.3921 0.0000 ? 0.7306 ?  
0.3220 0.2078 0.2919 0.2373 0.3069 0.1642 0.1056 0.4351 0.3971 0.5347 0.1083 0.1513 0.0270 0.0946 0.8339  
0.2693 0.2135 0.5430 0.4431 ? ? 0.3152 0.0000 0.0944 0.1183 0.2654 0.3239 0.2987 0.2824 0.4273 0.1494 0.3733  
0.4943 0.3346 0.3070 0.2418 0.2039 0.0000 0.3396 0.8551 0.1850 0.1461 0.6919 0.2922 0.4174 0.4050 0.3868  
0.0921 0.5444 0.3421 0.1978 0.2920 0.2433 0.0000 0.3339  
0.4403 ?????????????????????????????????????????????????????????????????????????????????????  
????????????????????????? 0.2328 0.1740 0.4526 0.1543 0.0000 0.5000 0.5686 0.1328 0.0205 0.3333 0.8571  
0.1000 0.0000 0.6667 0.0000 0.2717 0.2122 0.6186 0.2279 0.4000 0.5833 0.2000 0.0000 0.0000 0.0000 0.1247  
0.1524 0.3175 0.1630 0.2000 0.1667 0.0000 0.0000 0.0000  
0.0000 ?????????????????????????????????????????????????????????????????????????????????????  
?? 0.0000 0.9374 1.0000 0.8608 0.6670 0.1177 0.1238 ? 0.2210 0.0000 0.5724 0.3124 0.7483 0.1109 0.1720  
0.1146 ? 0.3882 0.3297 ? 0.7351 0.1802 0.4378 0.6219 0.4629 0.4175 0.6301 0.1887 0.2979 0.4114 0.3212  
0.4954 ? ? 0.5785 0.0028 0.3893 0.3973 0.1064 0.4174 0.2024 0.1964 0.1062 0.1940 0.3070 0.4955 0.3543 0.8855  
0.6325 0.0000 0.0963 0.4706 0.5576 ?????????????????????????????????  
Saldanha 0.5293 0.5589 0.4878 0.5542 ? 0.6808 0.5044 0.1665 0.0959 ?????? 0.3955 0.4091 ? 0.5458 ?  
0.7694 ? 0.6191 0.5363 ? ? 0.3863 ?????????????? 0.6372 0.5913 0.3771 0.4638 0.3780 0.3558 0.7476 0.6913





0.4324 0.6446 0.5860 0.7729 0.5100 0.5646 0.5288 0.7137 0.6503 0.3854 0.2255 0.9320 0.4606 0.4907 0.7299  
0.1901 0.6450 0.1912 0.5422 0.5590 0.2376 0.3390 0.5738 0.3963 0.4425 0.3328 0.3458 0.1030 0.5581 0.2818  
0.3171 0.4495 0.2304 0.4278 0.7392 0.7036 0.7667 0.5504 ? 0.4875 0.5608 0.5554 0.6085 0.4654 0.5088 0.5597  
0.5407 0.5719 0.4803 0.4751 0.3838 0.3378 0.3588 0.5418 ? 0.6807 ? ? ? 0.3987 0.5105 0.3442 0.5634 0.4780  
0.7435 0.4862 0.7554 0.8379 0.3971 0.4771 0.3173 0.6103 0.3709 0.4331 0.4668 0.3105 0.3819 0.8256 0.0752  
0.2641 0.4348 0.5250 0.5507 0.3466 0.4318 0.2021 0.6810 0.4377 0.0333 0.1189 0.1906 0.6945 0.6007 0.3095  
0.6363 0.9011 1.0000 1.0000 1.0000 0.4077 0.6136 0.3775 0.6592 0.5763 0.1208 0.0000 0.5759 1.0000 1.0000  
1.0000 0.8603 0.7432 0.8327 0.8414 0.9206 0.9895 0.8172 1.0000 0.9467 0.1250 0.9470 1.0000 0.5697 0.7089  
0.8955 0.9913 1.0000 1.0000 1.0000 0.7608 0.9203 0.6548 0.8613 0.8831 0.5662 0.6154 0.4882 0.5016 0.4168  
0.7351 0.6705 0.8501 0.8486 ? 0.4940 0.4630 0.4173 0.2553 0.2857 0.5000 0.0000 0.5000 0.7914 0.4647 0.5819  
0.6637 0.6250 0.8750 0.0000 0.0000 0.5668 0.0541 0.0000 0.0000 0.2000 0.2000 0.6000 1.0000 0.3469 0.2274  
0.3829 0.5897 0.0000 0.0000 0.5978 0.2405 0.6172 0.3449 0.0000 0.0000 0.5956 0.3486 0.4581 0.9259 0.5714  
0.2667 0.0000 0.0000 0.0000 0.5517 0.3411 0.6763 0.3173 0.6667 0.6111 0.2667 0.0278 0.0000 0.0000 0.3509  
0.4257 0.3485 0.4055 0.7667 0.6389 0.9444 0.0000 0.0000 0.0000 0.7588 1.0000 0.5704 0.4910 1.0000 0.6940  
0.5609 0.2509 0.1057 0.1890 0.8000 0.8973 0.8120 0.4839 0.6266 0.8000 0.5051 0.9267 1.0000 0.4826 0.1111  
0.6459 0.8481 0.3744 0.8384 0.0000 0.6378 0.8538 0.9099 0.5000 ? 0.0000 ? 0.0000 0.4361 0.8034 1.0000 0.3057  
0.5000 0.0000 0.0000 0.2000 0.0000 0.8770 1.0000 0.7020 0.7222 0.3750 0.2500 0.1429 0.0000 0.0000 1.0000  
0.0000 0.9886 ? ? ? ? ? ? 0.0000 0.0000 1.0000 0.4548 0.7059 0.6594 0.8029 0.4866 0.4749 0.6486 ? ? ? 0.6327  
0.1864 0.4115 0.8284 0.3201 0.1402 0.2963 0.3454 0.3632 0.1851 0.3948 0.2983 0.2755 0.1450 ? 0.5338 0.6283  
0.1320 0.3313 0.4486 0.4872 0.5410 ? 0.6574 0.4571 0.3774 0.5611 0.2491 0.1956 0.4483 0.3573 0.2525 0.3284  
0.4583 0.3887 0.5726 0.1776 0.7930 0.1568 0.6224 0.6049 0.3070 0.3346 0.2327 0.7785 0.1480 0.4004 0.2079  
0.1792 0.9219 0.5802 0.8489 0.7385 0.5543 0.2509 0.3209 ? 0.6274 0.6572 0.7020 0.3470 0.4469 0.2102 0.8963  
0.5387 0.5745 0.3296 0.2181 0.1677 ?  
Nanjing1 0.2605 0.4734 0.5937 0.6000 ? 0.1384 0.0383 ? ? ? ? ? 0.7858 ? ? ? 0.7521 ? 0.6751 ? 0.5795 ? 0.3221  
0.3020 ? ? 0.5477 0.4418 ? ? ? ? ? ? ? ? ? 0.2945 0.3587 0.1676 0.2690 0.2744 0.2907 0.5681 0.2658 0.2314  
0.6143 0.6074 0.5007 0.3352 0.1873 0.5817 0.7455 0.0000 0.1590 ? 0.1496 0.1720 0.7363 0.3604 0.6316  
0.3604 ? ? ? ? ? ? ? ? ? ? ? ? ? ? ? 0.6892 ? 0.3969 0.6040 ? ? 0.3442 0.4029 0.3674 0.4392 0.3708 0.3322 0.2992  
0.6002 0.5046 0.5230 0.4246 0.3735 0.5068 0.4452 ? ? ? ? ? ? 0.3943 0.2669 0.2021 0.4033 0.4443 0.5949 0.6502  
0.6230 0.5932 0.4669 ? ? ? ? ? ? ? ? ? 0.3191 1.0000 0.5853 0.4274 0.5360 0.3961 0.3974 0.3572 0.7672 0.4033  
0.3394 0.0584  
0.8722 ? ? ? ? ? ? ? ? ? ? ? ? ? ? ? ? ? ? ? ? ? ? ? ? ? ? ? ? ? ? ? ? ? ? ? ? ? ? ? ? ? ? ? ? ? ? ? ? ? ? ? ? ? ? ?  
? ? ? ? ? ? ? ? ? ? ? ? ? ? ? ? ? ? ? ? ? ? ? ? ? ? ? ? ? ? ? ? ? ? ? ? ? ? ? ? ? ? ? ? ? ? ? ? ? ? ? ? ? ? ? ?  
? ? ? ? ? ? ? ? ? ? ? ? ? ? ? ? ? ? ? ? ? ? ? ? ? ? ? ? ? ? ? ? ? ? ? ? ? ? ? ? ? ? ? ? ? ? ? ? ? ? ? ? ? ? ? ?  
? ? ? ? ? ? ? ? ? ? ? ? ? ? ? ? ? ? ? ? ? ? ? ? ? ? ? ? ? ? ? ? ? ? ? ? ? ? ? ? ? ? ? ? ? ? ? ? ? ? ? ? ? ? ? ?  
0.7226 0.4449  
0.5289 ? ? 0.5641 ? ? ? ? ? 0.8145 0.2031 0.4117 0.2089 0.1584 0.3735 0.3321 ? ? ? ? ? 0.4341 0.6270 0.2977  
0.8491 0.5376 ? ? ? 0.7496 0.5363 0.1830 0.4907 0.5940 ? 0.6789 0.4990 ? ? ? ? 0.4383 0.3466 0.9102  
0.0750 ? ? ? ? ? ? ? ? ? ? ? ? ? ? ? ? ? ? ? ? ? ? ? ? ? ? ? ? ? ? ? ? ? ? ? ? ? ? ? ? ? ? ? ? ? ? ? ? ? ? ? ? ? ? ?  
Hexian 0.3781 0.5721 0.6397 0.6376 0.3835 0.2550 0.0855 0.4843 0.4564 0.5807 0.4955 ? 0.5614 ? ? 0.8400  
1.0000 0.8394 0.9246 0.3129 0.7804 ? 0.6754 0.5401 0.6846 0.5931 1.0000 0.3068 0.3496 ? 0.7197 0.9780 0.1679  
0.1325 0.9460 0.5147 0.5918 0.6137 ? 0.3276 0.4239 0.2570 0.3944 0.4085 0.3302 0.7162 0.4240 0.7356 0.9480  
0.7529 0.5952 0.6171 0.3844 0.6034 0.8513 0.1019 0.4742 0.7846 0.4252 0.4160 0.8819 0.3297 0.2601 0.3407  
0.5940 0.7375 0.6541 0.5385 0.6498 0.4739 0.4204 0.2669 0.3841 0.2569 0.5092 0.4652 ? 0.5796 ? 0.3433 0.6593



0.4960 0.3948 0.6010 0.7314 0.5667 0.2548 0.4169 0.4539 0.3677 0.7496 0.7345 0.9847 0.0000 0.4796 0.3504  
0.6212 0.7669 ?????????????????????????????????  
Ngandong7\_9\_12 0.4136 0.6450 0.7582 0.6961 0.5521 0.6374 0.3963 0.5600 0.5060 0.7017 0.5938 0.7272  
0.8054 0.7579 0.8141 0.6198 0.7264 0.6411 0.6478 0.3561 0.8671 ? 0.7982 0.9112 0.5777 0.5356 0.6155 0.3191  
0.5101 0.7423 0.8286 0.8942 0.5831 0.4492 0.7004 0.7602 0.7523 0.4053 0.4612 0.7742 0.6001 0.3324 0.4253  
0.2957 0.2705 0.5619 0.6257 0.7614 0.5993 0.8565 0.4079 0.7599 0.7564 0.8480 0.4831 0.6476 0.1165 0.9295  
0.4803 0.4453 0.7143 0.3253 0.7307 0.3319 0.5509 0.5141 0.2196 0.2696 0.7814 0.6399 0.3700 0.5082 0.3172  
0.9032 0.8058 0.8711 0.4220 0.8154 0.4566 0.6175 0.7117 0.6347 0.8053 ?? 0.5809 0.5224 0.6271 0.7063 0.6420 ?  
0.6326 0.9260 0.6596 ????? 0.7126 ?????? 0.9511 0.8353 ????? 0.7638 ??????????????  
0.3400 ?????????? 0.5522  
0.8094 ?????????????????????????????????????????????????????????????????????????????????????  
????????????????????????????????????????????????????????????????????????????????????  
???????????????????????????????????????????????????????????????????????????????????? 0.4337 0.7746 0.8148  
0.6189 0.6610 0.1275 0.1396 0.2925 0.3485 0.4432 0.6738 0.3020 0.4327 0.7264 0.3652 0.1844 0.3582 0.5083  
0.3440 0.3014 0.3532 0.1879 0.2171 0.1627 ? 0.5876 0.4768 0.1229 0.6452 ?????? 0.6673 ??????????????  
0.4323 0.3644 ?????????????????????????????????????????????????????????????  
Dmanisi 0.0677 0.6283 0.6609 0.7054 0.6183 0.5717 0.3481 0.6781 0.6473 0.8783 0.8025 0.7584 0.7739 0.5471  
0.6638 0.6844 0.6766 0.7151 0.6503 0.2464 0.3352 ? 0.4853 0.2569 0.7039 0.6999 0.4548 0.4452 0.6730 0.5788  
0.8519 0.8020 0.5217 0.4397 0.8113 0.3778 0.3193 0.7012 0.6255 0.5840 0.5066 0.2723 0.2775 0.1982 0.1215  
0.6506 0.4790 0.2996 0.4367 0.5612 0.5260 0.5808 0.3651 0.6211 0.5191 0.3832 0.1183 0.7274 0.3022 0.2880  
0.8070 0.4725 0.5565 0.4799 0.8265 0.5709 0.2276 0.5212 0.6532 0.4408 0.6658 0.5096 0.3380 0.3787 0.6074  
0.3935 0.8198 0.7048 0.8284 0.5175 0.6878 0.4172 0.6903 ? 0.7192 0.6921 0.7053 0.6155 0.6270 0.6595 0.6741  
0.4335 0.4051 0.5864 0.6747 0.6888 0.7607 0.6745 0.4635 0.8148 0.5810 0.4366 0.0893 0.6803 0.4086 0.7360  
0.6759 0.4766 0.6644 0.5727 0.8529 0.7217 0.1499 0.8478 0.7714 0.7798 0.7237 0.7342 0.8148 0.8781 0.8778  
0.7610 0.3485 0.7898 0.8753 0.0341 0.4206 0.3839 0.5136 0.4474 0.3649 0.8224 0.7588 0.6711 0.6198 0.7909  
0.9043 0.7871 0.7029 0.8093 0.6850 0.6331 0.0761 0.0324 0.1998 0.3106 0.4322 0.3650 0.3527 0.6723 0.7472  
0.3717 0.7017 0.6622 0.7049 0.7045 0.7817 0.5881 0.6597 0.5305 0.1804 0.3716 0.8031 0.3601 0.3046 0.4358  
0.8761 0.5413 0.4538 0.4130 0.6790 0.7607 0.6399 0.7773 0.3386 0.7522 0.6420 0.4855 0.5705 0.5894 0.7470  
0.7360 0.5414 0.5534 0.5745 0.6387 0.6670 0.6973 0.6107 0.3675 ?????????????????? 1.0000 1.0000  
0.5897 1.0000 ????? 1.0000 1.0000 0.7423 0.9117 ?? 0.8461 0.7717 0.4857 0.5093 1.0000 0.7500 0.8616 0.7695  
0.3205 0.9259 0.4762 0.2000 0.3077 0.0000 0.3333 0.6270 0.6568 0.2624 0.4864 0.7667 0.9167 0.5000 0.1667  
0.0000 0.1667 1.0000 1.0000 0.0499 1.0000 1.0000 0.8333 1.0000 0.0000 0.0000 0.0000 0.5162 0.2753 0.1872  
0.0000 1.0000 0.5664 0.4213 0.0860 0.4732 0.0000 0.8000 0.8019 0.3537 0.1745 0.4594 0.0000 0.6873 0.4559  
0.1371 0.6252 0.1481 0.4488 0.3828 0.1598 0.1566 0.1111 0.6072 0.4921 0.2904 1.0000 0.6667 0.6667 0.5833  
0.5000 0.4330 0.4416 0.2832 0.2295 1.0000 0.3333 0.7222 0.6000 0.3333 0.7405 0.5809 0.3694 0.6510 1.0000  
0.3750 0.7857 0.5000 0.0000 ?????????????? 0.5228 0.3270 0.3276 0.8018 0.3905 0.2102 0.4428 0.5322  
0.1417 0.3245 0.8103 0.2656 0.1951 0.3894 0.2440 0.4833 0.2275 0.2243 0.4707 0.4404 0.2306 0.7004 0.4137  
0.3872 0.7854 0.7214 0.8122 0.2154 0.3190 0.5500 0.7651 0.6952 0.6790 0.5697 0.8258 0.3957 0.5495 0.4466  
0.2677 0.8059 0.7915 0.2275 0.4246 0.3334 0.3419 0.1287 0.4905 0.6623 0.8226 0.6901 0.6384 0.7881 0.7521  
0.7419 0.0000 0.2264 0.2674 0.2231 0.2305 0.8451 0.3624 0.3431 0.2218 0.5785 0.2261 0.6536 0.6055 0.9124  
0.7904 0.7156 0.3266 0.4617 0.1983 0.8068 0.3353 0.3503 0.3590 0.2548 0.2663 0.3438





21112200130111101101111211001??22????????????????????????????????????????????????????????????????  
????????????????????????????????????????????????????????????????

Eliye\_Springs 1?02??[1

2]02000????002101202011100001110111?20???1?10?????00000121011110?21221011111111021220211121101  
21110112011002?1011?120????????????????????????????????????????????????????????????????????????  
????????????????????????????

Ndutu

10020?3020001??0??1100??00??000011111?0?10??2?0101?????0?1000110111121210010010111101000021  
122122210101010000201110211011?120????????????????????????????????????????????????????????????  
????????????????????????????????

Irhoud\_1\_2 1[0 1]0[0 2][0 2]0101010111[0 1][0 1]01[1 2]01[0 1]0[2

3]110000001110012011142100100010?011000[1 2]21[0 1][0 1]100?21001[0 1]01011011110[0 1][0

1]1210112211012[0 1]110??102?1[0 1]201[1 2][1 2 3][0

1]?021111211121221110010000110112221112????211?0102200100111200001100??0?????????????????12?11122  
?0012?0010020102

Florisbad

11122130112101100011021030100000011100220111?21001?001010?1010???011????????????????????????  
????????????????????????????1?1?1????????????????????????????????????????????????????????????  
????????????????????????????????

Omo\_II

1112212111210??0111212103011100????????????????????????????????2011010110103011310101101111011221  
2112211012011011110211020211??2?2????????????????????????????????????????????????????????????  
????????????????????????????????

LH\_18

111220201121011100110210301??11001110012?10??2100110010?01100022101110?20110??11111??101002  
3101121110120110111102110112231??21????????????????????????????????????????????????????????  
??????????0?2??211?1????????????????

Skhul\_V\_IX 1112[1 2]?[1 2][0 1][1 2]121[0 1]12[0

1]00120100311001100111001211103?21011?????110000??01[1 2][0 1][0

2]0211011010110101100012121122110120110111202110112231?021222222001112100011012121010000122111  
210111112210011110201011100000000000100002000310301202011120?0?1010001

Qafzeh\_IX

11122?1101210120001212103110?11001110012001122100112110101100012000101010200??101101011011  
1210112211212011011110211020221???22221211000?02100011011110210000022112220101111100000112021  
1010011000010021110131103111011120111200011010101

Mladec\_I\_II\_V\_VI [1 2]11220[1 2 3]101210120[0 1]002[0 1]2[0 1]03110?110011100120110321101021211100[0  
1][0 1]01[2 3]001[1 2][0 1]10[1 3]0[1 2][0 2][0 1]1[0 1]1011[1 2]1111[0 1][0 1]2[0 1]221[0 2][1 2]12211[0  
1]1201101111021102[0 1]2[0 1 2][1

3]1?122????????????????????????????????????????????????????????????????????????????????3??303?0????????  
????????????

Cro\_Magnon\_I\_II\_III 11122[0 1][1 2]101210120001202[0 1]0311??110011100220111421101[0 1][0 2]0[0  
1]0103[0 1][0 1][0 1]01[2 3]0[0 1]11[0 1][0 1 2]12[0 1]210?01011[1 2]1111111212[1  
2]12211012011011110211021223101222222202000?1210002101110021?2110????22?1?????1010011120000010  
0????????????[2 3]???311?1???2????2??????0???

Oase\_1\_2

1112201101210120?0121200301??10001110012011122200111010?01100000?01110?10000??1011111100111  
0121122111120110111102110112230?12022222210101211002211210121211112210112011100220000011010001  
0000????????????2???21120???2???2?0012020202

ZKD\_UC\_101\_103 111220[2 3]111210120001212[0 1]031??[0

1]1001111022011122100110010?0210001200111[2 3][0 1]2121[1 3]11101111110111212[1  
2]122110120110111102110[1 2]122[1 3]1012222222001202110001012110222[1  
2]210221112101110022010101210101000000000000?1?00[2 3]??03113111?2012120???2010202

Liujiang

111221310121012000121200310??21001111012011122100110010?02101013001110?10210??1011111111111  
21211211101201101111021102122310122????????????????????????????????????????????????????????????00  
00000101100002000311?3???????????????????

SH4\_5 20000?102010212110110011201?00[0 1][0

1]01011011000?2111010020002010010211100?31211001211011110210210102221000101001011111112301121  
00101101011121102021112230122110220000111000022000001100100000100???0?????????1???0???002211122  
21?????0???

Tabun\_1 20000?00201021010011002120100201100011??????20?1000120?0?100010200110?[2

3]11010013111??10000230[0 2]2112210120111011211101213221?020100000000[0 1]212111[0  
1]0000122300221012211201001010210000011121211001001000100001011120113003112221122211011010201

Tabun\_2

????????????????????????????????????????????????????????????????????????????????????????  
????????????2????????????22221111110100[0

1]202112222021211022111210110101200010111200001100??????????????????????????12?2112?21???00?0101

Spy\_I\_II 20[0 1]0[0 1]?[0 2]02??021210[0 1]1[1 2]002120100101100011?????????????0??????0001??[0

1]0110?311[1 2]10013112??1000023[0 1]0111021[0

1]020011111211101213220??2010000000111210110211122201?110122?2?12?11???22001?10112021111?0?????  
???01020131113002011120111200011010101

Gibraltar\_1

20000?00201021210011002120100101100011001000?10110101201100?001??10111?312010013112??10000  
230221122100211110112111012132201020????????????????????????????????????????????????????????????  
?????????1????3??03??[0 1]???????????????????????

Amud

200011002??0212100110021201??10??????????00?1??100012010?000012210110?312010013112??1100022  
1[0 2]2112210120011011201101213221??2?211000000121111[0

1]202111222012221111220111001122001?01122021111001000001001011120113113101220102202112110211

La\_Chapelle\_aux\_Saints

20000?002??0212100120021201??201100011001?00?100101012010?000010?00110?21311001311211100002

01[0  
2]2001200020011011211101113221?121010000000?001?1201101????1220??22012?11010111100011010?110101  
00????????????????????????????????????????????????????????

La\_Ferrassie\_1

20120?002010211100110021201??101100011001000?10010021?0103000012200110?2121100131121110000  
23101002210020011111211101213220??21????????????????????????????????????????????????????????  
??0??0?1????????????0????????????????????

Shanidar\_1\_5 2000[0 2]0[0 1]020102[0 1]210[0 1]1[1 2]0021201??101100011001000?2[0 1]010121[1  
2]010?10101[1 2]200110?21101001311211100002[0 3]10111221[0 1]120[0 1]1[0 1]11[0 1]21110121322[0  
1]?021010000000?1211101111222121110021010110101112200010111210000000?????????1?0??????11[0  
1]11221111210120120011

Cesaire

201021002010212100120021201??101100011001000?110101011010?1????????????????????????????????  
????????????????????????????????????????110000000111210110000122212111002??2111010022000110122121110102  
000001011000130003002012121111211010110011

Saccopastore\_I\_II 20000?00201021?10012002120100101100011001[0 1]00?10010[0

1]0010?01101012200100?31321001311111100002110111210120[0  
1]11112111012132201021????????????????????????????????????????????????????????????????01??11  
200131[0 1][1 2]1????????????????

Neanderthalensis\_type

2000110020102101012101212010010????????????????????????????01011100010?31??10013002??????????  
????????????????????1?3221?1????????????????????????????????????????????????????????????  
????????????????????????????????????

Xiahe

????????????????????????????????????????????????????????????????????????????????????  
????????????????????????000000111210110110211102301?2000???31?11??2210010010222110100????????  
????????????????21??212021012???

Dali 21122100210011102021012020[0

1]?01001110111021142200110120000110012111000?2111100101101011010201?21122101311100001111021101  
11121????????????????????????????????????????????????????????????????????????????2??3??2????????  
?????????

Hualongdong

21122100210011102011012020??0100111010102114221011012000001001211000????????????????????  
????2??13111????????02?1?1?2?111100110?0?10000??11230122200????10?11??2200010010010000100?  
????0010??22003??31[1 2]?[2 3]??2110121[1 2]01101[1 2]101

Harbin 20020?0021001111002101102010[0

1]0100111011102014211011012000000012110000?2112100101101011111110212221013111011111100110111  
021????????????????????????????????????????????????????????????????????????????3??3?2?3????????  
???????

Jinniushan

20020?002100111000210120201??11001110111021142100101120000100012101000?2112100100001011011



211011122101311100001111102010110121????????????????????????????????????????????????????????????????0  
21110000112100322031122????????????????????????????

Maba

20020?0020001111002101202010011????????????????????????????????000111?010????????????????????????????  
?????????????????????????1??111????????????????????????????????????????????????????????????????????  
????????????????????????????????????????

Xuchang

1000??1020001??0001101??2010001????????????????????????????????00012210100?21211011110110100201  
21122100130111????111100100??2????????????????????????????????????????????????????????????????????  
????????????????????????????????????????????

Mauer\_1

????????????????????????????????????????????????????????????????????????????????????????????  
????????????????????????????????0000001212100121102112212121211102212110110102200000110222110000?????????  
?????????????????????01212101210020010101

Arago\_II\_XIII\_XXI\_XLVII

11122010200011001011012020100?00111110011?02201100111010001002??1010????????????????????????  
????????????????????????????????1011012?[0 1]10[0 1]001[0 1]2]02[1 2]0002[0 1][1 2]02112[1 2][0  
1]212121112110211[0 1]10010220000011[0 1]222110000????????????00002???3113101212101212010020102

Broken\_Hill

11122100200021001010012010111000011111011100320010011200130110211101111311220?100020011000  
2012111211012101011111110110110121????????????????????????????????????????????????????????????  
??????????1?002??21131????????????????????

Petralona\_1

2012210020001111101001201011111001111100110032001001120013010012100010?3121200100010011????  
??21112110111010111?111102?10110121????????????????????????????????????????????????????????  
??????211000200021131????????????????????

Ceprano

1012200020001101001100201011100????????????????????????????????000211110021311220000000??1110021?  
211121101110101111??1010101??21????????????????????????????????????????????????????????  
????????????????????????????????????????

Steinheim

200211002000111110110020101110000111010111003211010????0?011200221010010112010010110??101001  
11221122011110101112010000012110121????????????????????????????????????????????????????????  
??????????????300021231????????????????????

Saldanha

11122??020002100001000201011111????????????????????????????????00020?000021311?20000000??1??????  
????????????????????????112??2????????????????????????????????????????????????????????  
????????????????????????????????????

Bodo

10022030200001200021002?10111?00111110012?012001011120000120?1??00????????????110?????????

??122210121110??0??11?32211021????????????????????????????????????????????????????????????????  
????????????????????????????????????????????????????????????????

Ternifine\_1\_2\_3\_4

????????????????????????????????????????????????????????????????0002111000????????????????????????????  
????????????????????1?100????001[1 2]1[0 1]1[1 2][0 1]21[0 1][0 2]11[0 1]012111101022221121200111000[0  
1]01110011101121010000????????????????????????0122111[1 2][1 2][1 2]0[0 1]10[0 1]10[0 1][0 1]1  
Peking\_X\_XII\_XIII\_LII\_RC 0000[1 2]010200000[1 2]021210020101001100111002101?14220010?1??1?0[1  
2]0010?20002?31213010000[1 2]1001000200[0  
2]111120012111000020000120000?120000?????101?11101000110110122112122001010010220100010121???0  
0100211000002112012112211[2 3]001220102200010010201

Nanjing1

00001010200000201120000010100110011101210?012?1001?????????0010?200021213230010000?0?????  
????????????????????????????????0????????????????????????????????????????????????????????????  
????????????????????????????????????????????????????????????????

Hexian

1112211020001100112001201010000????????????????????????????????1012102100313110301000110101100200  
01110200101000000100001200001?020????????????????????????0201??20????????????????????????1122??01??22  
110?????0[0 1]101?????????????????????0010[0 2]02

Sambungmacan\_1\_30000[0 1]?[0 1]021101100[1 2]12101001010?00????????????????????????????????[0

1]00212200031311[1 2]30[0 1]000000?00011[1 2][0 1]0[0 2][1 2]1101111[0  
1]1000000100001210001??21????????????????????????????????????????????????????????????????  
????????????????????????????????????

Sangiran\_2\_17 000021102000110011[1 2]00110001?00001111100101120001100100031[0 1]0121021000?211[0  
2]3001000000000002[0

1]0?01112001210100002101112000011120????????????????????????????????????????????????????????  
????????1100002??21110????????????????????

Ngandong7\_9\_12 00020?202120010021[1 2][0 1]0100[0 1]01[0 1]000????????????????????????????????[0 2]0[0

1]211[1 2][0 1]0[0 1]0?[2 3]1[2 3][0 2]30[0 1][0 1]00010001[0 1]21220[0 1 2][1 2]120[1  
2]101210000000001120[0 1]000?02[0  
1]????????????????????????????????????????????????????????????????????????????????????  
?????

Dmanisi 0[0 1][0 1][0 1]10[1 2]0[1 2]00001201120000000?0000010100011[1 2]01[0 1][0 1][0

1]001100100021[0 2]00210[0 1]00[0 1]0?[1 3][0 1][0 1][0 1][0 2][0 3]00[0 1]000[0 1]0101120020[0 2][1 2][0 1]1[1  
2]111[0 1]1101000021011121000[0 1][0 1][0 1]21001[1 2][0 1]0000110[1 2]0[0 1][0 1]0[0 1]2111[0 1]0[0  
1]11021012210[0 2]310111112200[0 1][0 1]00[0 1]0220000[0 1]000?000000?1?00[0 2]11[0 1][1  
2]0000002111111[0 1]121120112

Rabat

????????????????????????????????????????????????????????0100001????????????????????????????????  
????????????????????????????1110001000????101000011????????????????????????????????????????1??0?00100000002  
1100?3011302??0102100121012??0012

STW53

01101?10100001201021010000??000001010000120100000110010001100021000000?2111100101100001100  
100?00110000210100012100011100011121????????????????????????????????????????????????????????  
?????????????000?20?000????????????????????

OH\_9

00002020200001000?21001000??000?????????????????????????????????0021020000?212210010000??01120010  
2111110101010000110111010001?121????????????????????????????????????????????????????????????  
????????????????????????????????????????????????????????

Turkana\_ER3733\_3883 10[0 1]20?2010001110[0 1]12[0 1][0 1]01000??00000101000012003[0  
1]100111010?00100021010010?2122100100010001120[0 1][0 1]02111100111010000110011[1 2][0 1]00011[0  
1]2[0 1]00111100100201101211100??10[0 1]1002210011010110220000011022211010012000??0??[0 1]10[0  
1]20[0 1]0200?[0 3]022211222101101[1 2]???

;

ccode - 0.3 5 7 9.15 17.18 20 23 25.28 30.44 47.58 60.61 63 66 68 70 72 76.81 83.87 89.95 99.101 103.117  
119.123 127.204 206.208 214 217.219 223.225 227.228 231.232 234.554 + 4 6 8 16 19 21.22 24 29 45.46 59 62  
64.65 67 69 71 73.75 82 88 96.98 102 118 124.126 205 209.213 215.216 220.222 226 229.230 233;

;

**Appendix 4. TNT script for running multiple replications, using sectorial searches, drifting, ratchet and fusing combined**

```

log run.log ;
cost < ;
mxram 2000 ;
p data.tnt ;
taxname = ;
tsave *run.tre ;
ptnt commtime 1 ;
    hold 100000 ;
    coll tbr ;
    report +/1 ;
ptnt begin ajob 100 +.-myself /ram 200 =
    hold 100000 ;
    coll tbr ;
    keep 0 ;
    ratchet: iter 10 upfactor 4 downfact 4 autoconst
0 num 30 give 99 equa ;
    dri: it 10 fit 1.00 rfi 0.20 aut 0 num 60 give 99xfa
3.00 equa ;
    sect: mins 45 maxs 98 self 84 incr 75 minf 10 god
75 drift 6 glob 3 dglob 10 rou 3 xss 10-14 +2
noxev noeq slack 200 ;
    tf:rou 5 minf 3 best ke nochoo swap ;
    xm:lev 10 55 rep 1000 fuse 10 dri 10 rss css xss
hit 10 rat 10 xmix ;
    xm ;
    tchoose 1.;
return trees ;
ptnt wait ajob ;
keep 0 ;
ptnt get ajob ;
collapse 3 ;
unique * ;
save ;
export - run_nexus.tre ;
tsave/;
keep 0 ;
p run.tre;
nelsen *;
tsave *strict_consensus.tre;
save /;
tsave/;
keep 0;
p strict_consensus.tre;
export - strict_consensus_nexus.tre;
keep 0;
p run.tre;
majority =50 *;
tsave *majority_consensus.tre;
save /;
tsave/;
keep 0;
p run.tre;
ttag=;
majority =50;
keep 0;
p majority_consensus.tre;
tsave *majority_consensus_tagged.tre;
save *;
export - majority_consensus_tagged_nexus.tre;
tsave/;
log/;
proc/;
zzz;

```

**Appendix 5. TNT script for running multiple replications, using sectorial searches, drifting, ratchet and fusing combined, with backbone constraints**

```

log run.log ;
cost < ;
mxram 2000 ;
p data.tnt ;
taxname = ;
tsave *run.tre ;
ptnt commtime 1 ;
  hold 100000 ;
  coll tbr ;
  report +/1 ;
ptnt begin ajob 100 +.-myself /ram 200 =
  hold 100000 ;
  force / (Habilis_OH7_OH24_ER1805
(Antecessor ((Irhoud_1_2 Florisbad Omo_II
LH_18 Skhul_V_IX Qafzeh_IX
Mladec_I_II_V_VI Cro_Magnon_I_II_III
Oase_1_2 ZKD_UC_101_103 Liujiang
Tabun_2)(SH4_5 Tabun_1 Spy_I_II Gibraltar_1
Amud La_Chapelle_aux_Saints La_Ferrassie_1
Shanidar_1_5 Cesaire Saccopastore_I_II
Neanderthalensis_type Xiahe ))));
  constrain = ;
  coll tbr ;
  keep 0 ;
  ratchet: iter 10 upfactor 4 downfact 4 autoconst
0 num 30 give 99 equa ;
  dri: it 10 fit 1.00 rfi 0.20 aut 0 num 60 give 99xfa
3.00 equa ;
  sect: mins 45 maxs 98 self 84 incr 75 minf 10 god
75 drift 6 glob 3 dglob 10 rou 3 xss 10-14 +2
noxev noeq slack 200 ;
  tf:rou 5 minf 3 best ke nochoo swap ;
  xm:lev 10 55 rep 1000 fuse 10 dri 10 rss css xss
hit 10 rat 10 xmix ;
  xm ;
  tchoose 1.;
  return trees ;
ptnt wait ajob ;
keep 0 ;
ptnt get ajob ;
collapse 3 ;
unique * ;
save ;
export - run_nexus.tre ;
tsave/;
keep 0 ;
p run.tre;
nelsen *;
tsave *strict_consensus.tre;
save /;
tsave/;
keep 0;
p strict_consensus.tre;
export - strict_consensus_nexus.tre;
keep 0;
p run.tre;
majority =50 *;
tsave *majority_consensus.tre;
save /;
tsave/;
keep 0;
p run.tre;
ttag=;
majority =50;
keep 0;
p majority_consensus.tre;
tsave *majority_consensus_tagged.tre;
save *;
export - majority_consensus_tagged_nexus.tre;
tsave/;
log/;
proc/;
zzz;

```

**Appendix 6. TNT script for calculating the Bremer Supports and Relative Bremer Supports**

```

log run_Bremer.log;

```

```
mxram 4000;
p data.tnt;
hold 100000;
p majority_consensus.tre ;
ttags = ;
naked -;
tplot 0;
sub 100x0.90 ;
bsupp !!+0 0. ;
ttags;
ttags & run_Bremer.svg;
log/;
zzz;
```

**Appendix 7. Synapomorphies mapping on the most-parsimonious phylogenetic tree. Characters are listed in Appendix 1 and Appendix 2. Node number are indicated in S-Figure 27.**

Antecessor :

Char. 0: 0.522 --> 0.358  
 Char. 5: 0.343-0.520 --> 0.140  
 Char. 21: 0.479-0.733 --> 0.841  
 Char. 22: 0.689 --> 0.612  
 Char. 27: 0.463-0.501 --> 0.672  
 Char. 39: 0.391-0.479 --> 0.039  
 Char. 40: 0.468-0.504 --> 0.000  
 Char. 60: 0.401 --> 0.000  
 Char. 90: 0.540-0.612 --> 0.706  
 Char. 106: 0.556 --> 0.563  
 Char. 107: 0.388-0.408 --> 0.308  
 Char. 112: 0.342-0.467 --> 0.000  
 Char. 114: 0.250-0.373 --> 0.384  
 Char. 122: 0.329-0.373 --> 0.253  
 Char. 123: 0.787-0.802 --> 0.000  
 Char. 195: 0.400 --> 0.500  
 Char. 200: 0.413-0.444 --> 0.385  
 Char. 203: 0.500-0.625 --> 0.875  
 Char. 205: 0.750 --> 0.812  
 Char. 208: 0.938 --> 0.994  
 Char. 223: 0.242-0.324 --> 0.380  
 Char. 228: 0.270-0.330 --> 0.230  
 Char. 230: 0.571 --> 0.714  
 Char. 231: 0.300-0.400 --> 0.000  
 Char. 238: 0.227-0.274 --> 0.383  
 Char. 239: 0.200-0.400 --> 0.500  
 Char. 240: 0.583 --> 0.666  
 Char. 241: 0.500 --> 0.100  
 Char. 259: 0.500 --> 1.000  
 Char. 265: 0.600 --> 1.000  
 Char. 275: 0.333 --> 1.000  
 Char. 285: 0.333 --> 0.500  
 Char. 305: 0.666 --> 1.000  
 Char. 321: 0.782-0.836 --> 0.839  
 Char. 323: 0.413-0.498 --> 0.234  
 Char. 326: 0.316-0.370 --> 0.621  
 Char. 333: 0.108 --> 0.000  
 Char. 346: 0.480 --> 0.487

Char. 362: 0.337-0.404 --> 0.224  
 Char. 363: 0.458-0.469 --> 0.246  
 Char. 364: 0.359-0.374 --> 0.231  
 Char. 394: 0.523 --> 0.685  
 Char. 395: 0.560-0.570 --> 0.945  
 Char. 402: 0 --> 1  
 Char. 410: 0 --> 1  
 Char. 429: 0 --> 1  
 Char. 431: 0 --> 1  
 Char. 432: 0 --> 1  
 Char. 434: 1 --> 0  
 Char. 435: 1 --> 0  
 Char. 437: 1 --> 0  
 Char. 446: 1 --> 2  
 Char. 542: 1 --> 0  
 Char. 543: 0 --> 1  
 Char. 590: 0 --> 1  
 Char. 595: 0 --> 1  
 Char. 606: 0 --> 1  
 Char. 609: 3 --> 2  
 Char. 617: 2 --> 1  
 Char. 618: 1 --> 2  
 Char. 620: 0 --> 1  
 Char. 621: 1 --> 2  
 Char. 622: 2 --> 1  
 Char. 623: 1 --> 2

Narmada :

Char. 1: 0.363 --> 0.605  
 Char. 2: 0.347 --> 0.553  
 Char. 5: 0.347 --> 0.526  
 Char. 18: 0.499-0.692 --> 0.850  
 Char. 39: 0.391-0.404 --> 0.600  
 Char. 40: 0.506 --> 0.529  
 Char. 45: 0.746 --> 1.000  
 Char. 46: 0.533 --> 0.776  
 Char. 50: 0.695 --> 0.821  
 Char. 53: 0.642 --> 0.537  
 Char. 58: 0.590 --> 0.870  
 Char. 59: 0.580 --> 0.800

Char. 69: 0.243-0.253 --> 0.112  
Char. 86: 0.385-0.462 --> 0.528  
Char. 91: 0.453 --> 0.530  
Char. 92: 0.427-0.429 --> 0.770  
Char. 93: 0.366-0.401 --> 0.200  
Char. 98: 0.588 --> 0.609  
Char. 108: 0.432-0.667 --> 0.728  
Char. 109: 0.472-0.567 --> 0.759  
Char. 110: 0.715 --> 0.781  
Char. 126: 0.566-0.604 --> 0.682  
Char. 321: 0.793-0.836 --> 0.851  
Char. 322: 0.888-0.937 --> 0.795  
Char. 323: 0.528 --> 0.584  
Char. 333: 0.466 --> 0.553  
Char. 334: 0.128-0.130 --> 0.068  
Char. 337: 0.144 --> 0.105  
Char. 338: 0.399 --> 0.492  
Char. 346: 0.467-0.498 --> 0.502  
Char. 347: 0.132-0.134 --> 0.038  
Char. 348: 0.317-0.324 --> 0.603  
Char. 410: 0 --> 2  
Char. 412: 1 --> 2  
Char. 416: 0 --> 2  
Char. 417: 0 --> 1  
Char. 459: 0 --> 2  
Char. 462: 1 --> 2  
Char. 463: 1 --> 0  
Char. 467: 1 --> 0

Eliye\_Springs :

Char. 5: 0.343-0.520 --> 0.704  
Char. 20: 0.804 --> 0.765  
Char. 21: 0.479-0.733 --> 0.466  
Char. 23: 0.771 --> 0.679  
Char. 27: 0.463-0.501 --> 0.433  
Char. 39: 0.391-0.479 --> 0.610  
Char. 85: 0.441 --> 0.371  
Char. 98: 0.651 --> 0.257  
Char. 108: 0.359 --> 0.799  
Char. 111: 0.307-0.329 --> 0.610  
Char. 112: 0.342-0.467 --> 0.642  
Char. 114: 0.250-0.373 --> 0.170

Char. 321: 0.782-0.836 --> 0.750  
Char. 322: 0.825-0.829 --> 0.690  
Char. 323: 0.413-0.498 --> 0.705  
Char. 326: 0.316-0.370 --> 0.315  
Char. 346: 0.480 --> 0.373  
Char. 442: 1 --> 0  
Char. 448: 0 --> 1  
Char. 449: 1 --> 0  
Char. 458: 1 --> 0

Ndutu :

Char. 0: 0.504-0.536 --> 0.437  
Char. 4: 0.453-0.547 --> 0.594  
Char. 5: 0.343-0.346 --> 0.191  
Char. 6: 0.321-0.327 --> 0.238  
Char. 10: 0.354-0.503 --> 0.611  
Char. 11: 0.414-0.423 --> 0.515  
Char. 18: 0.399-0.474 --> 0.390  
Char. 20: 0.758-0.806 --> 0.637  
Char. 22: 0.585-0.588 --> 0.481  
Char. 23: 0.745-0.811 --> 0.744  
Char. 29: 0.496-0.522 --> 0.479  
Char. 30: 0.200-0.212 --> 0.169  
Char. 33: 0.402-0.437 --> 0.694  
Char. 35: 0.351-0.466 --> 0.255  
Char. 37: 0.297-0.356 --> 0.226  
Char. 38: 0.411-0.461 --> 0.633  
Char. 39: 0.391-0.404 --> 0.239  
Char. 45: 0.593 --> 0.536  
Char. 47: 0.595-0.668 --> 0.343  
Char. 48: 0.524 --> 0.347  
Char. 50: 0.632-0.659 --> 0.914  
Char. 53: 0.642-0.670 --> 0.705  
Char. 55: 0.364-0.401 --> 0.581  
Char. 56: 0.376-0.387 --> 0.172  
Char. 57: 0.423-0.514 --> 0.392  
Char. 58: 0.539-0.586 --> 0.507  
Char. 62: 0.287-0.368 --> 0.188  
Char. 64: 0.346-0.349 --> 0.371  
Char. 68: 0.291-0.327 --> 0.380  
Char. 69: 0.243-0.253 --> 0.381  
Char. 70: 0.230-0.295 --> 0.094



Char. 71: 0.474-0.482 --> 0.233  
Char. 72: 0.250-0.265 --> 0.000  
Char. 73: 0.326-0.355 --> 0.377  
Char. 74: 0.477-0.482 --> 0.216  
Char. 75: 0.342-0.346 --> 0.604  
Char. 77: 0.283-0.309 --> 0.000  
Char. 82: 0.680-0.699 --> 0.774  
Char. 84: 0.257-0.322 --> 0.056  
Char. 85: 0.462-0.511 --> 0.343  
Char. 86: 0.385-0.462 --> 0.350  
Char. 87: 0.314-0.414 --> 0.040  
Char. 88: 0.338-0.433 --> 0.047  
Char. 89: 0.460-0.509 --> 0.315  
Char. 91: 0.398-0.409 --> 0.367  
Char. 92: 0.427-0.429 --> 0.346  
Char. 98: 0.460-0.588 --> 0.413  
Char. 101: 0.543-0.592 --> 0.770  
Char. 107: 0.375-0.408 --> 0.369  
Char. 111: 0.305-0.329 --> 0.255  
Char. 114: 0.250-0.373 --> 0.000  
Char. 115: 0.370-0.373 --> 0.060  
Char. 117: 0.543-0.631 --> 0.401  
Char. 118: 0.356-0.471 --> 0.000  
Char. 119: 0.369-0.430 --> 0.000  
Char. 120: 0.433-0.491 --> 0.000  
Char. 121: 0.268-0.295 --> 0.180  
Char. 122: 0.447-0.462 --> 0.685  
Char. 123: 0.845-0.855 --> 0.961  
Char. 126: 0.566-0.604 --> 0.983  
Char. 128: 0.417-0.461 --> 0.677  
Char. 129: 0.315-0.337 --> 0.515  
Char. 130: 0.446 --> 0.255  
Char. 138: 0.371-0.507 --> 0.836  
Char. 139: 0.384-0.440 --> 0.000  
Char. 321: 0.782-0.836 --> 0.706  
Char. 322: 0.888-0.894 --> 0.875  
Char. 326: 0.380 --> 0.392  
Char. 327: 0.537-0.562 --> 0.661  
Char. 331: 0.330-0.624 --> 0.633  
Char. 335: 0.189 --> 0.447  
Char. 336: 0.286-0.292 --> 0.352

Char. 339: 0.526 --> 0.593  
Char. 341: 0.252-0.287 --> 0.307  
Char. 344: 0.411-0.462 --> 0.063  
Char. 351: 0.514-0.538 --> 0.667  
Char. 359: 0.417-0.500 --> 0.013  
Char. 360: 0.202-0.463 --> 0.000  
Char. 361: 0.254-0.291 --> 0.297  
Char. 363: 0.458-0.469 --> 0.548  
Char. 364: 0.386-0.388 --> 1.000  
Char. 371: 0.330-0.470 --> 0.000  
Char. 372: 0.414-0.557 --> 0.000  
Char. 406: 1 --> 3  
Char. 424: 2 --> 0  
Char. 464: 1 --> 0  
Char. 468: 0 --> 1  
Char. 469: 0 --> 2  
Char. 473: 2 --> 0  
Char. 482: 0 --> 1  
Char. 494: 1 --> 2  
Char. 496: 1 --> 2  
Char. 502: 2 --> 0  
Char. 507: 1 --> 0  
Char. 509: 1 --> 0  
Char. 525: 1 --> 0

Irhoud\_1\_2 :

Char. 0: 0.579-0.672 --> 0.691  
Char. 1: 0.263-0.497 --> 0.189  
Char. 2: 0.298-0.461 --> 0.188  
Char. 3: 0.349-0.354 --> 0.356  
Char. 4: 0.302-0.420 --> 0.180  
Char. 5: 0.343-0.515 --> 0.303  
Char. 12: 0.325-0.351 --> 0.308  
Char. 14: 0.411 --> 0.504  
Char. 19: 0.514-0.618 --> 0.669  
Char. 22: 0.689-0.826 --> 0.838  
Char. 23: 0.788-0.901 --> 0.946  
Char. 27: 0.463-0.501 --> 0.517  
Char. 28: 0.478-0.515 --> 0.197  
Char. 29: 0.496 --> 0.464  
Char. 30: 0.297-0.412 --> 0.243  
Char. 31: 0.234-0.356 --> 0.232

Char. 33: 0.402-0.437 --> 0.308  
Char. 36: 0.567-0.683 --> 0.504  
Char. 39: 0.391-0.479 --> 0.308  
Char. 40: 0.468-0.472 --> 0.365  
Char. 41: 0.254-0.276 --> 0.174  
Char. 44: 0.523 --> 0.625  
Char. 47: 0.520-0.683 --> 0.477  
Char. 48: 0.524 --> 0.559  
Char. 50: 0.659-0.755 --> 0.853  
Char. 51: 0.693-0.716 --> 0.059  
Char. 52: 0.487-0.562 --> 0.112  
Char. 55: 0.364-0.401 --> 0.086  
Char. 56: 0.453-0.534 --> 0.136  
Char. 57: 0.514 --> 0.568  
Char. 60: 0.401-0.505 --> 0.397  
Char. 62: 0.411-0.436 --> 0.526  
Char. 67: 0.209-0.354 --> 0.078  
Char. 68: 0.276-0.344 --> 0.210  
Char. 69: 0.243-0.253 --> 0.232  
Char. 76: 0.456-0.475 --> 0.814  
Char. 78: 0.319-0.451 --> 0.489  
Char. 79: 0.352-0.398 --> 0.324  
Char. 80: 0.756-0.758 --> 0.170  
Char. 81: 0.283-0.450 --> 0.149  
Char. 83: 0.432-0.481 --> 0.870  
Char. 91: 0.409 --> 0.508  
Char. 92: 0.427-0.429 --> 0.547  
Char. 98: 0.651-0.759 --> 0.639  
Char. 99: 0.297-0.308 --> 0.550  
Char. 100: 0.200-0.213 --> 0.326  
Char. 105: 0.228-0.271 --> 0.148  
Char. 106: 0.439-0.468 --> 0.535  
Char. 107: 0.388-0.408 --> 0.596  
Char. 108: 0.353-0.359 --> 0.259  
Char. 110: 0.408-0.492 --> 0.405  
Char. 111: 0.305-0.329 --> 0.503  
Char. 112: 0.429-0.546 --> 0.591  
Char. 114: 0.250-0.373 --> 0.387  
Char. 120: 0.433-0.539 --> 0.549  
Char. 121: 0.268 --> 0.381  
Char. 128: 0.421-0.520 --> 0.790

Char. 129: 0.337 --> 0.421  
Char. 130: 0.446 --> 0.336  
Char. 132: 0.544 --> 0.589  
Char. 133: 0.303-0.338 --> 0.251  
Char. 137: 0.313-0.334 --> 0.507  
Char. 140: 0.341-0.420 --> 1.000  
Char. 143: 0.696 --> 0.815  
Char. 144: 0.423-0.429 --> 0.634  
Char. 150: 0.535-0.656 --> 0.245  
Char. 151: 0.327 --> 0.085  
Char. 152: 0.365-0.567 --> 0.674  
Char. 153: 0.412-0.548 --> 0.850  
Char. 154: 0.228-0.246 --> 0.683  
Char. 156: 0.218-0.426 --> 0.591  
Char. 162: 0.820-0.913 --> 0.000  
Char. 164: 0.428-0.479 --> 0.683  
Char. 165: 0.704-0.807 --> 0.848  
Char. 166: 0.913 --> 0.969  
Char. 168: 0.337-0.372 --> 0.797  
Char. 169: 0.491-0.492 --> 0.572  
Char. 170: 0.486-0.565 --> 0.650  
Char. 171: 0.521-0.575 --> 0.621  
Char. 172: 0.451-0.525 --> 0.599  
Char. 173: 0.693-0.714 --> 0.633  
Char. 174: 0.228-0.364 --> 0.555  
Char. 176: 0.585-0.706 --> 0.873  
Char. 177: 0.475-0.480 --> 0.752  
Char. 183: 0.256-0.257 --> 0.312  
Char. 184: 0.241-0.352 --> 0.480  
Char. 185: 0.358-0.400 --> 0.584  
Char. 186: 0.252-0.260 --> 0.872  
Char. 209: 0.327-0.345 --> 0.270  
Char. 217: 0.336-0.424 --> 0.498  
Char. 223: 0.242-0.324 --> 0.391  
Char. 231: 0.300-0.400 --> 0.900  
Char. 237: 0.533-0.618 --> 0.451  
Char. 240: 0.583 --> 0.750  
Char. 241: 0.500 --> 0.900  
Char. 242: 0.000 --> 0.083  
Char. 247: 0.401 --> 0.654  
Char. 256: 0.231-0.317 --> 0.210

Char. 257: 0.575-0.588 --> 0.557  
Char. 258: 0.342-0.477 --> 0.189  
Char. 259: 0.000-0.500 --> 1.000  
Char. 260: 0.445 --> 0.571  
Char. 263: 0.401-0.440 --> 0.767  
Char. 264: 0.340-0.377 --> 0.296  
Char. 266: 0.399-0.491 --> 0.577  
Char. 268: 0.721-0.745 --> 0.410  
Char. 269: 0.480-0.610 --> 0.431  
Char. 270: 0.000-0.100 --> 0.900  
Char. 271: 0.176-0.248 --> 0.348  
Char. 273: 0.619-0.623 --> 0.438  
Char. 276: 0.309-0.385 --> 0.425  
Char. 277: 0.231-0.232 --> 0.346  
Char. 278: 0.251-0.284 --> 0.151  
Char. 281: 0.323-0.365 --> 0.397  
Char. 282: 0.231-0.292 --> 0.342  
Char. 284: 0.375 --> 0.000  
Char. 288: 0.066-0.200 --> 0.400  
Char. 289: 0.212-0.238 --> 0.343  
Char. 293: 0.250 --> 0.000  
Char. 295: 0.222 --> 0.333  
Char. 298: 0.392 --> 0.402  
Char. 299: 0.193-0.241 --> 0.267  
Char. 302: 0.250 --> 0.000  
Char. 323: 0.396-0.498 --> 0.191  
Char. 325: 0.318-0.557 --> 0.565  
Char. 327: 0.495-0.562 --> 0.274  
Char. 331: 0.479-0.558 --> 0.620  
Char. 333: 0.283 --> 0.346  
Char. 334: 0.112-0.129 --> 0.060  
Char. 335: 0.305-0.326 --> 0.409  
Char. 336: 0.173-0.219 --> 0.000  
Char. 337: 0.183-0.257 --> 0.015  
Char. 338: 0.363-0.366 --> 0.193  
Char. 341: 0.252-0.255 --> 0.086  
Char. 342: 0.473-0.560 --> 0.785  
Char. 343: 0.353-0.600 --> 0.625  
Char. 345: 0.449-0.668 --> 0.795  
Char. 347: 0.132-0.151 --> 0.115  
Char. 350: 0.283-0.321 --> 0.616

Char. 351: 0.398-0.495 --> 0.534  
Char. 353: 0.302-0.413 --> 0.193  
Char. 354: 0.292-0.315 --> 0.061  
Char. 355: 0.276-0.300 --> 0.379  
Char. 357: 0.397-0.432 --> 0.492  
Char. 360: 0.202-0.331 --> 0.476  
Char. 362: 0.337-0.404 --> 0.179  
Char. 363: 0.458-0.469 --> 0.449  
Char. 369: 0.249-0.284 --> 0.628  
Char. 370: 0.425 --> 0.625  
Char. 373: 0.498-0.666 --> 0.128  
Char. 374: 0.226-0.600 --> 0.188  
Char. 377: 0.288-0.333 --> 0.000  
Char. 378: 0.256-0.433 --> 0.206  
Char. 379: 0.845-0.848 --> 0.976  
Char. 380: 0.633-0.641 --> 0.932  
Char. 381: 0.816-0.824 --> 0.914  
Char. 383: 0.557-0.783 --> 0.000  
Char. 384: 0.378-0.385 --> 0.097  
Char. 385: 0.486-0.588 --> 1.000  
Char. 387: 0.551-0.559 --> 0.464  
Char. 388: 0.502-0.515 --> 0.450  
Char. 389: 0.673-0.675 --> 0.504  
Char. 390: 0.316-0.365 --> 0.260  
Char. 392: 0.611 --> 0.181  
Char. 393: 0.783-0.860 --> 0.606  
Char. 394: 0.376-0.395 --> 0.275  
Char. 395: 0.560-0.570 --> 0.731  
Char. 396: 0.614-0.868 --> 1.000  
Char. 397: 0.245-0.294 --> 0.318  
Char. 398: 0.209-0.304 --> 0.485  
Char. 425: 0 --> 1  
Char. 450: 1 --> 0  
Char. 490: 2 --> 1  
Char. 493: 2 --> 0  
Char. 523: 1 --> 0  
Char. 533: 01 --> 2  
Char. 536: 1 --> 2  
Char. 544: 2 --> 0  
Char. 546: 1 --> 0  
Char. 550: 2 --> 1

Char. 557: 0 --> 1  
Char. 565: 0 --> 1  
Char. 575: 0 --> 1  
Char. 619: 1 --> 0  
Char. 629: 1 --> 2

Florisbad :

Char. 5: 0.515 --> 0.518  
Char. 20: 0.804-0.845 --> 1.000  
Char. 21: 0.733-0.833 --> 1.000  
Char. 39: 0.444-0.492 --> 0.496  
Char. 85: 0.462 --> 0.659  
Char. 86: 0.512 --> 0.636  
Char. 87: 0.502-0.566 --> 0.780  
Char. 88: 0.619-0.637 --> 0.830  
Char. 89: 0.460-0.461 --> 0.642  
Char. 90: 0.422-0.559 --> 0.593  
Char. 93: 0.398-0.428 --> 0.443  
Char. 95: 0.339 --> 0.493  
Char. 108: 0.353-0.359 --> 0.766  
Char. 109: 0.400 --> 0.713  
Char. 111: 0.245-0.305 --> 0.125  
Char. 113: 0.450-0.549 --> 0.738  
Char. 126: 0.451-0.526 --> 0.229  
Char. 133: 0.303-0.338 --> 0.342  
Char. 136: 0.269-0.342 --> 0.350  
Char. 321: 0.766-0.836 --> 0.946  
Char. 346: 0.353-0.480 --> 0.519  
Char. 348: 0.478 --> 0.580  
Char. 355: 0.276-0.300 --> 0.211  
Char. 356: 0.309-0.328 --> 0.213  
Char. 357: 0.219-0.381 --> 0.000  
Char. 438: 1 --> 2  
Char. 460: 0 --> 1  
Char. 466: 1 --> 0

Omo\_II :

Char. 0: 0.579-0.672 --> 0.745  
Char. 9: 0.396-0.397 --> 0.506  
Char. 10: 0.334-0.493 --> 0.714  
Char. 12: 0.325-0.351 --> 0.501  
Char. 18: 0.204-0.281 --> 0.187  
Char. 25: 0.223 --> 0.206

Char. 28: 0.478-0.515 --> 0.557  
Char. 33: 0.402-0.437 --> 0.562  
Char. 41: 0.254-0.276 --> 0.329  
Char. 46: 0.658-0.666 --> 0.829  
Char. 47: 0.520-0.683 --> 0.685  
Char. 48: 0.429 --> 0.354  
Char. 49: 0.746 --> 0.907  
Char. 51: 0.742-0.805 --> 1.000  
Char. 52: 0.487-0.562 --> 0.744  
Char. 53: 0.445-0.460 --> 0.680  
Char. 54: 0.373 --> 0.252  
Char. 55: 0.364-0.401 --> 0.869  
Char. 58: 0.698-0.838 --> 0.846  
Char. 63: 0.518-0.540 --> 0.476  
Char. 64: 0.360-0.396 --> 0.470  
Char. 66: 0.237-0.278 --> 0.174  
Char. 67: 0.312-0.428 --> 0.594  
Char. 68: 0.346-0.392 --> 0.897  
Char. 69: 0.243-0.473 --> 0.763  
Char. 71: 0.495-0.502 --> 0.443  
Char. 73: 0.326-0.355 --> 0.285  
Char. 74: 0.477-0.482 --> 0.114  
Char. 75: 0.346 --> 0.355  
Char. 77: 0.333 --> 0.330  
Char. 78: 0.319-0.331 --> 0.260  
Char. 81: 0.283-0.450 --> 0.574  
Char. 82: 0.603-0.699 --> 0.768  
Char. 85: 0.334-0.414 --> 0.007  
Char. 86: 0.247-0.343 --> 0.080  
Char. 87: 0.409 --> 0.250  
Char. 88: 0.507 --> 0.391  
Char. 89: 0.323-0.402 --> 0.067  
Char. 91: 0.264-0.290 --> 0.171  
Char. 93: 0.398-0.428 --> 0.366  
Char. 98: 0.651-0.790 --> 0.961  
Char. 126: 0.509-0.526 --> 0.649  
Char. 326: 0.316 --> 0.360  
Char. 330: 0.626-0.690 --> 0.735  
Char. 333: 0.283 --> 0.147  
Char. 336: 0.173-0.219 --> 0.294  
Char. 337: 0.183-0.257 --> 0.372

Char. 339: 0.526 --> 0.478  
Char. 340: 0.196-0.304 --> 0.192  
Char. 341: 0.252-0.255 --> 0.552  
Char. 343: 0.353-0.392 --> 0.322  
Char. 345: 0.446 --> 0.000  
Char. 346: 0.317-0.480 --> 0.077  
Char. 347: 0.280-0.328 --> 0.422  
Char. 416: 0 --> 1  
Char. 417: 0 --> 1  
Char. 427: 0 --> 1  
Char. 428: 0 --> 1  
Char. 459: 0 --> 2  
Char. 461: 0 --> 1  
Char. 463: 2 --> 0  
Char. 469: 0 --> 1  
Char. 471: 2 --> 3  
Char. 519: 2 --> 1

LH\_18 :

Char. 0: 0.579-0.672 --> 0.545  
Char. 1: 0.263-0.540 --> 0.575  
Char. 2: 0.298-0.532 --> 0.669  
Char. 3: 0.345-0.354 --> 0.556  
Char. 4: 0.302-0.420 --> 0.748  
Char. 5: 0.515 --> 0.529  
Char. 6: 0.354-0.356 --> 0.345  
Char. 7: 0.299-0.359 --> 0.383  
Char. 10: 0.305-0.493 --> 0.031  
Char. 22: 0.584-0.666 --> 0.571  
Char. 23: 0.677-0.788 --> 0.602  
Char. 27: 0.243 --> 0.216  
Char. 30: 0.297-0.331 --> 0.036  
Char. 31: 0.234-0.243 --> 0.147  
Char. 32: 0.335-0.431 --> 0.307  
Char. 33: 0.402-0.437 --> 0.227  
Char. 39: 0.444-0.492 --> 0.610  
Char. 40: 0.468-0.504 --> 0.514  
Char. 42: 0.372-0.446 --> 0.366  
Char. 43: 0.341-0.408 --> 0.286  
Char. 44: 0.523 --> 0.416  
Char. 45: 0.834-0.869 --> 0.907  
Char. 46: 0.644-0.665 --> 0.600

Char. 58: 0.698-0.838 --> 0.637  
Char. 59: 0.706-0.840 --> 0.668  
Char. 60: 0.604-0.670 --> 0.728  
Char. 65: 0.218-0.297 --> 0.133  
Char. 69: 0.243-0.473 --> 0.148  
Char. 70: 0.216-0.295 --> 0.297  
Char. 72: 0.224-0.265 --> 0.327  
Char. 76: 0.475 --> 0.731  
Char. 80: 0.756-0.758 --> 0.890  
Char. 82: 0.452-0.642 --> 0.430  
Char. 91: 0.264-0.290 --> 0.463  
Char. 93: 0.398-0.428 --> 0.481  
Char. 96: 0.266-0.280 --> 0.331  
Char. 98: 0.651-0.790 --> 0.579  
Char. 101: 0.721 --> 0.852  
Char. 104: 0.618-0.718 --> 0.451  
Char. 110: 0.408-0.492 --> 0.842  
Char. 117: 0.543-0.574 --> 0.429  
Char. 123: 0.840-0.855 --> 0.838  
Char. 133: 0.303-0.338 --> 0.210  
Char. 135: 0.292-0.307 --> 0.358  
Char. 138: 0.430-0.468 --> 0.503  
Char. 139: 0.129-0.149 --> 0.047  
Char. 215: 0.062-0.136 --> 0.039  
Char. 216: 0.466 --> 0.302  
Char. 217: 0.301-0.347 --> 0.131  
Char. 228: 0.423-0.490 --> 0.661  
Char. 230: 0.571 --> 0.857  
Char. 231: 0.100 --> 0.000  
Char. 246: 0.186-0.206 --> 0.278  
Char. 248: 0.301-0.309 --> 0.424  
Char. 320: 0.062-0.147 --> 0.005  
Char. 322: 0.808-0.818 --> 0.666  
Char. 323: 0.547-0.658 --> 0.660  
Char. 325: 0.318-0.365 --> 0.263  
Char. 330: 0.626-0.690 --> 0.263  
Char. 342: 0.473-0.560 --> 0.669  
Char. 346: 0.317-0.480 --> 0.495  
Char. 347: 0.280-0.328 --> 0.153  
Char. 351: 0.398-0.399 --> 0.357  
Char. 352: 0.350 --> 0.426

Char. 359: 0.385-0.413 --> 0.313  
Char. 360: 0.202-0.331 --> 0.173  
Char. 361: 0.241-0.256 --> 0.220  
Char. 368: 0.490 --> 0.526  
Char. 369: 0.249-0.284 --> 0.203  
Char. 370: 0.425 --> 0.406  
Char. 371: 0.196 --> 0.047  
Char. 372: 0.229 --> 0.059  
Char. 415: 0 --> 1  
Char. 442: 1 --> 0  
Char. 462: 1 --> 2  
Char. 479: 0 --> 1  
Char. 486: 1 --> 0  
Char. 487: 0 --> 1  
Char. 488: 1 --> 0  
Char. 489: 1 --> 0  
Char. 491: 2 --> 3  
Char. 493: 2 --> 0  
Char. 497: 2 --> 1  
Char. 516: 2 --> 1  
Char. 609: 3 --> 2

Skhul\_V\_IX :

Char. 0: 0.713-0.750 --> 0.696  
Char. 2: 0.131-0.183 --> 0.017  
Char. 3: 0.196 --> 0.276  
Char. 6: 0.528 --> 0.510  
Char. 8: 0.438 --> 0.470  
Char. 9: 0.350-0.381 --> 0.565  
Char. 10: 0.517 --> 0.714  
Char. 11: 0.113 --> 0.019  
Char. 12: 0.183 --> 0.180  
Char. 13: 0.479-0.525 --> 0.608  
Char. 14: 0.411 --> 0.440  
Char. 15: 0.158 --> 0.320  
Char. 16: 0.235 --> 0.274  
Char. 17: 0.155 --> 0.249  
Char. 18: 0.218 --> 0.442  
Char. 19: 0.615-0.769 --> 0.920  
Char. 20: 0.616-0.642 --> 0.599  
Char. 21: 0.725 --> 0.435  
Char. 22: 0.557 --> 0.743

Char. 23: 0.726 --> 0.790  
Char. 24: 0.139 --> 0.212  
Char. 25: 0.153 --> 0.239  
Char. 26: 0.277 --> 0.427  
Char. 28: 0.223-0.287 --> 0.415  
Char. 29: 0.634 --> 0.532  
Char. 32: 0.355 --> 0.414  
Char. 36: 0.721-0.800 --> 0.874  
Char. 37: 0.208 --> 0.291  
Char. 38: 0.365-0.369 --> 0.169  
Char. 39: 0.318 --> 0.316  
Char. 41: 0.203-0.220 --> 0.189  
Char. 43: 0.823 --> 0.835  
Char. 44: 0.790-0.809 --> 0.718  
Char. 58: 0.908 --> 0.909  
Char. 59: 0.864-0.904 --> 0.814  
Char. 60: 0.247 --> 0.221  
Char. 62: 0.206 --> 0.270  
Char. 63: 0.701 --> 0.665  
Char. 64: 0.197-0.345 --> 0.081  
Char. 65: 0.338-0.497 --> 0.749  
Char. 66: 0.291-0.407 --> 1.000  
Char. 67: 0.365 --> 0.425  
Char. 69: 0.536 --> 0.550  
Char. 70: 0.207 --> 0.264  
Char. 71: 0.547 --> 0.509  
Char. 72: 0.170-0.179 --> 0.229  
Char. 77: 0.328-0.348 --> 0.372  
Char. 84: 0.071-0.129 --> 0.205  
Char. 85: 0.128 --> 0.211  
Char. 87: 0.321 --> 0.240  
Char. 88: 0.442 --> 0.320  
Char. 89: 0.116 --> 0.213  
Char. 90: 0.165-0.177 --> 0.236  
Char. 91: 0.130 --> 0.250  
Char. 92: 0.134 --> 0.282  
Char. 93: 0.188 --> 0.142  
Char. 94: 0.017-0.018 --> 0.249  
Char. 95: 0.207 --> 0.362  
Char. 96: 0.143-0.276 --> 0.333  
Char. 97: 0.405-0.533 --> 0.371

Char. 99: 0.149-0.249 --> 0.445  
Char. 101: 0.602-0.684 --> 0.537  
Char. 105: 0.183-0.194 --> 0.269  
Char. 108: 0.235-0.261 --> 0.378  
Char. 109: 0.381-0.390 --> 0.463  
Char. 110: 0.343-0.365 --> 0.589  
Char. 112: 0.178 --> 0.349  
Char. 113: 0.415-0.496 --> 0.600  
Char. 115: 0.241 --> 0.317  
Char. 116: 0.163-0.185 --> 0.405  
Char. 117: 0.580 --> 0.679  
Char. 118: 0.172-0.176 --> 0.240  
Char. 121: 0.104-0.170 --> 0.183  
Char. 122: 0.651 --> 0.546  
Char. 123: 0.859 --> 0.865  
Char. 126: 0.610 --> 0.815  
Char. 127: 0.178 --> 0.000  
Char. 128: 0.406 --> 0.608  
Char. 129: 0.498 --> 1.000  
Char. 130: 0.303 --> 0.000  
Char. 131: 0.163-0.252 --> 0.000  
Char. 132: 0.473-0.538 --> 0.574  
Char. 134: 0.202 --> 0.010  
Char. 139: 0.242-0.309 --> 0.517  
Char. 226: 0.383 --> 0.000  
Char. 231: 0.200 --> 0.000  
Char. 237: 0.270 --> 0.212  
Char. 239: 0.500 --> 0.300  
Char. 320: 0.347 --> 0.506  
Char. 321: 0.672 --> 0.530  
Char. 322: 0.812 --> 0.780  
Char. 323: 0.485 --> 0.326  
Char. 324: 0.721-0.732 --> 0.753  
Char. 325: 0.260 --> 0.242  
Char. 328: 0.494-0.612 --> 0.434  
Char. 329: 0.581-0.656 --> 0.548  
Char. 333: 0.361-0.413 --> 0.221  
Char. 338: 0.278 --> 0.220  
Char. 340: 0.348-0.630 --> 1.000  
Char. 344: 0.150-0.184 --> 0.344  
Char. 345: 0.375 --> 0.505

Char. 346: 0.252 --> 0.209  
Char. 347: 0.513-0.634 --> 0.184  
Char. 350: 0.227-0.386 --> 0.584  
Char. 355: 0.337 --> 0.287  
Char. 356: 0.328 --> 0.469  
Char. 359: 0.574 --> 0.336  
Char. 361: 0.316 --> 0.371  
Char. 362: 0.764 --> 0.494  
Char. 363: 0.771 --> 0.628  
Char. 364: 0.588 --> 0.557  
Char. 366: 0.218-0.436 --> 0.000  
Char. 370: 0.431-0.442 --> 0.311  
Char. 371: 0.267-0.346 --> 0.566  
Char. 372: 0.333-0.396 --> 0.590  
Char. 408: 0 --> 12  
Char. 421: 2 --> 1  
Char. 440: 0 --> 1  
Char. 446: 1 --> 2  
Char. 471: 1 --> 2  
Char. 472: 0 --> 1  
Char. 510: 1 --> 2  
Char. 516: 2 --> 1  
Char. 523: 1 --> 0  
Char. 525: 2 --> 1

Qafzeh\_IX :

Char. 1: 0.148-0.161 --> 0.082  
Char. 3: 0.195 --> 0.154  
Char. 4: 0.140-0.222 --> 0.000  
Char. 7: 0.299-0.326 --> 0.067  
Char. 8: 0.339-0.438 --> 0.181  
Char. 9: 0.350-0.381 --> 0.102  
Char. 10: 0.388-0.517 --> 0.183  
Char. 12: 0.209-0.237 --> 0.247  
Char. 16: 0.101-0.139 --> 0.052  
Char. 17: 0.023-0.105 --> 0.000  
Char. 20: 0.616-0.642 --> 0.665  
Char. 22: 0.284-0.557 --> 0.243  
Char. 24: 0.054-0.061 --> 0.037  
Char. 25: 0.086 --> 0.046  
Char. 26: 0.244 --> 0.234  
Char. 28: 0.223-0.287 --> 0.020

Char. 33: 0.402-0.604 --> 0.611  
Char. 34: 0.165 --> 0.029  
Char. 35: 0.664-0.697 --> 0.656  
Char. 37: 0.169 --> 0.086  
Char. 45: 0.834 --> 0.947  
Char. 47: 0.469-0.499 --> 0.620  
Char. 48: 0.326-0.491 --> 0.514  
Char. 50: 0.803-0.856 --> 1.000  
Char. 51: 0.742-0.809 --> 0.655  
Char. 52: 0.379-0.450 --> 0.192  
Char. 53: 0.361-0.399 --> 0.000  
Char. 55: 0.202-0.364 --> 0.086  
Char. 56: 0.699-0.755 --> 1.000  
Char. 57: 0.514-0.640 --> 0.731  
Char. 61: 0.689-0.797 --> 1.000  
Char. 63: 0.764-0.826 --> 1.000  
Char. 67: 0.282-0.365 --> 0.078  
Char. 68: 0.323-0.392 --> 0.000  
Char. 69: 0.389-0.473 --> 0.056  
Char. 73: 0.254-0.341 --> 0.239  
Char. 75: 0.283-0.314 --> 0.203  
Char. 76: 0.289-0.339 --> 0.100  
Char. 79: 0.261-0.319 --> 0.115  
Char. 80: 0.738-0.758 --> 0.893  
Char. 81: 0.219-0.283 --> 0.000  
Char. 82: 0.443-0.452 --> 0.000  
Char. 85: 0.115 --> 0.070  
Char. 86: 0.247-0.265 --> 0.278  
Char. 87: 0.409-0.554 --> 0.565  
Char. 89: 0.110 --> 0.066  
Char. 91: 0.069-0.130 --> 0.000  
Char. 92: 0.068-0.134 --> 0.000  
Char. 94: 0.017-0.018 --> 0.000  
Char. 97: 0.405-0.533 --> 0.733  
Char. 98: 0.617-0.664 --> 0.596  
Char. 100: 0.072-0.073 --> 0.127  
Char. 102: 0.552-0.670 --> 0.322  
Char. 103: 0.094-0.134 --> 0.157  
Char. 104: 0.787 --> 0.533  
Char. 111: 0.101-0.105 --> 0.353  
Char. 115: 0.209-0.212 --> 0.148

Char. 124: 0.455 --> 0.264  
Char. 125: 0.104 --> 0.192  
Char. 126: 0.293-0.526 --> 0.289  
Char. 127: 0.276-0.299 --> 0.516  
Char. 129: 0.290-0.337 --> 0.190  
Char. 130: 0.446-0.463 --> 0.706  
Char. 135: 0.216-0.274 --> 0.199  
Char. 137: 0.291-0.318 --> 0.245  
Char. 138: 0.430 --> 0.364  
Char. 141: 0.133 --> 0.037  
Char. 142: 0.382-0.609 --> 0.308  
Char. 143: 0.696-0.701 --> 0.693  
Char. 148: 0.365 --> 0.224  
Char. 149: 0.436-0.445 --> 0.143  
Char. 152: 0.365 --> 0.238  
Char. 153: 0.412 --> 0.189  
Char. 154: 0.392 --> 0.407  
Char. 156: 0.575 --> 0.768  
Char. 160: 0.675-0.724 --> 0.621  
Char. 161: 0.567-0.768 --> 0.509  
Char. 162: 0.784 --> 0.859  
Char. 163: 0.772-0.786 --> 0.606  
Char. 164: 0.428-0.440 --> 0.010  
Char. 166: 0.891 --> 0.977  
Char. 167: 0.812 --> 0.456  
Char. 169: 0.478 --> 0.640  
Char. 170: 0.514 --> 0.601  
Char. 172: 0.451 --> 0.563  
Char. 173: 0.691 --> 0.000  
Char. 178: 0.757 --> 0.777  
Char. 180: 0.156 --> 0.312  
Char. 181: 0.034-0.117 --> 0.371  
Char. 182: 0.045-0.133 --> 0.320  
Char. 183: 0.003-0.216 --> 0.326  
Char. 184: 0.073-0.274 --> 0.335  
Char. 185: 0.550 --> 0.562  
Char. 186: 0.378 --> 0.400  
Char. 187: 0.476-0.662 --> 0.672  
Char. 190: 0.349 --> 0.482  
Char. 191: 0.390 --> 0.000  
Char. 198: 0.248-0.359 --> 0.590



Char. 199: 0.236 --> 0.610  
Char. 201: 0.391-0.435 --> 0.594  
Char. 202: 0.750 --> 0.000  
Char. 206: 0.346 --> 0.530  
Char. 207: 0.115-0.167 --> 0.207  
Char. 208: 0.389 --> 0.338  
Char. 209: 0.458 --> 0.598  
Char. 211: 0.200 --> 0.400  
Char. 213: 0.000 --> 0.750  
Char. 214: 0.359 --> 0.383  
Char. 215: 0.062-0.136 --> 0.142  
Char. 220: 0.210 --> 0.164  
Char. 223: 0.154 --> 0.000  
Char. 224: 0.000 --> 0.125  
Char. 228: 0.200-0.366 --> 0.194  
Char. 229: 0.444-0.555 --> 0.333  
Char. 230: 0.571 --> 0.857  
Char. 232: 0.000 --> 1.000  
Char. 238: 0.195-0.207 --> 0.115  
Char. 242: 0.000 --> 0.416  
Char. 250: 0.500-0.583 --> 1.000  
Char. 252: 0.000 --> 1.000  
Char. 258: 0.342 --> 0.252  
Char. 259: 0.000-0.500 --> 1.000  
Char. 260: 0.445 --> 0.741  
Char. 263: 0.401-0.440 --> 0.736  
Char. 266: 0.397-0.491 --> 0.612  
Char. 267: 0.209-0.241 --> 0.483  
Char. 269: 0.422 --> 0.402  
Char. 270: 0.000-0.100 --> 0.800  
Char. 271: 0.287 --> 0.288  
Char. 272: 0.281-0.295 --> 0.409  
Char. 274: 0.109-0.393 --> 0.000  
Char. 275: 0.222 --> 0.333  
Char. 276: 0.313 --> 0.348  
Char. 277: 0.170-0.232 --> 0.369  
Char. 279: 0.186-0.282 --> 0.106  
Char. 280: 0.333-0.444 --> 0.666  
Char. 281: 0.314-0.334 --> 0.486  
Char. 282: 0.312-0.336 --> 0.568  
Char. 283: 0.575 --> 0.703

Char. 284: 0.375 --> 0.500  
Char. 285: 0.000 --> 0.333  
Char. 286: 0.166 --> 0.416  
Char. 289: 0.253 --> 0.267  
Char. 290: 0.334-0.353 --> 0.455  
Char. 291: 0.489 --> 0.671  
Char. 292: 0.342-0.368 --> 0.020  
Char. 293: 0.250-0.500 --> 1.000  
Char. 294: 0.000 --> 0.333  
Char. 295: 0.222 --> 0.666  
Char. 296: 0.000 --> 0.600  
Char. 299: 0.336-0.529 --> 0.588  
Char. 300: 0.404-0.420 --> 0.469  
Char. 302: 0.250-0.625 --> 0.750  
Char. 304: 0.285-0.571 --> 0.857  
Char. 307: 0.256-0.526 --> 0.159  
Char. 309: 0.725 --> 0.831  
Char. 321: 0.726-0.786 --> 0.889  
Char. 322: 0.812-0.907 --> 0.947  
Char. 330: 0.790-0.912 --> 0.928  
Char. 334: 0.128 --> 0.033  
Char. 335: 0.273-0.380 --> 0.179  
Char. 336: 0.194-0.219 --> 0.111  
Char. 337: 0.156-0.179 --> 0.024  
Char. 339: 0.735-0.850 --> 1.000  
Char. 341: 0.182-0.255 --> 0.000  
Char. 342: 0.316-0.395 --> 0.203  
Char. 347: 0.513-0.634 --> 0.982  
Char. 349: 0.463-0.499 --> 0.642  
Char. 351: 0.475-0.530 --> 0.556  
Char. 354: 0.340-0.410 --> 0.428  
Char. 357: 0.219 --> 0.390  
Char. 358: 0.510 --> 0.537  
Char. 365: 0.380-0.570 --> 0.646  
Char. 368: 0.347-0.524 --> 0.324  
Char. 375: 0.462-0.669 --> 0.740  
Char. 377: 0.288-0.301 --> 0.273  
Char. 381: 0.754 --> 0.662  
Char. 382: 0.536 --> 0.340  
Char. 383: 0.621 --> 0.694  
Char. 384: 0.612 --> 0.378

Char. 387: 0.343-0.531 --> 0.246  
Char. 388: 0.442 --> 0.303  
Char. 389: 0.602 --> 0.000  
Char. 390: 0.210 --> 0.131  
Char. 391: 0.727 --> 0.661  
Char. 392: 0.425-0.487 --> 0.541  
Char. 393: 0.909-0.940 --> 0.962  
Char. 394: 0.636-0.658 --> 0.693  
Char. 395: 0.568 --> 0.728  
Char. 422: 0 --> 1  
Char. 441: 1 --> 0  
Char. 466: 1 --> 0  
Char. 493: 2 --> 0  
Char. 500: 0 --> 2  
Char. 517: 1 --> 0  
Char. 520: 3 --> 1  
Char. 529: 2 --> 1  
Char. 531: 2 --> 1  
Char. 532: 2 --> 1  
Char. 535: 1 --> 0  
Char. 537: 1 --> 0  
Char. 547: 2 --> 1  
Char. 562: 1 --> 2  
Char. 567: 1 --> 0  
Char. 571: 2 --> 1  
Char. 572: 2 --> 1  
Char. 578: 1 --> 0  
Char. 584: 0 --> 1  
Char. 590: 0 --> 1  
Char. 591: 0 --> 1  
Char. 596: 0 --> 1  
Char. 601: 0 --> 1  
Char. 602: 0 --> 1  
Char. 604: 0 --> 1  
Char. 606: 0 --> 1  
Char. 607: 0 --> 1  
Char. 612: 3 --> 1

Mladec\_I\_II\_V\_VI :

Char. 0: 0.713-0.750 --> 0.771  
Char. 1: 0.148-0.161 --> 0.212  
Char. 4: 0.140-0.222 --> 0.336

Char. 5: 0.357 --> 0.282  
Char. 13: 0.479-0.525 --> 0.361  
Char. 14: 0.411 --> 0.278  
Char. 19: 0.615-0.769 --> 0.555  
Char. 21: 0.725 --> 0.837  
Char. 27: 0.193-0.234 --> 0.155  
Char. 30: 0.420 --> 0.425  
Char. 31: 0.331 --> 0.335  
Char. 33: 0.402-0.604 --> 0.202  
Char. 34: 0.183 --> 0.234  
Char. 36: 0.721-0.800 --> 0.670  
Char. 38: 0.365-0.369 --> 0.429  
Char. 40: 0.378 --> 0.340  
Char. 41: 0.203-0.220 --> 0.221  
Char. 42: 0.760 --> 0.801  
Char. 44: 0.790-0.809 --> 0.906  
Char. 45: 0.704 --> 0.698  
Char. 46: 0.469-0.579 --> 0.465  
Char. 48: 0.326-0.491 --> 0.185  
Char. 49: 0.567 --> 0.644  
Char. 50: 0.739 --> 0.731  
Char. 51: 0.809 --> 0.900  
Char. 52: 0.522 --> 0.646  
Char. 53: 0.399 --> 0.496  
Char. 54: 0.558 --> 0.339  
Char. 55: 0.377 --> 0.715  
Char. 56: 0.699-0.755 --> 0.672  
Char. 57: 0.514-0.640 --> 0.371  
Char. 59: 0.864-0.904 --> 0.905  
Char. 61: 0.665 --> 0.595  
Char. 65: 0.338-0.497 --> 0.268  
Char. 66: 0.291-0.407 --> 0.243  
Char. 68: 0.463 --> 0.496  
Char. 71: 0.547 --> 0.583  
Char. 74: 0.594 --> 0.700  
Char. 78: 0.277 --> 0.300  
Char. 79: 0.261-0.319 --> 0.322  
Char. 80: 0.616 --> 0.528  
Char. 81: 0.333 --> 0.430  
Char. 82: 0.443-0.452 --> 0.648  
Char. 86: 0.247-0.265 --> 0.212

Char. 90: 0.165-0.177 --> 0.037  
Char. 93: 0.188 --> 0.364  
Char. 95: 0.207 --> 0.000  
Char. 99: 0.149-0.249 --> 0.147  
Char. 105: 0.183-0.194 --> 0.000  
Char. 106: 0.277 --> 0.265  
Char. 108: 0.235-0.261 --> 0.070  
Char. 109: 0.381-0.390 --> 0.178  
Char. 110: 0.343-0.365 --> 0.118  
Char. 112: 0.178 --> 0.174  
Char. 113: 0.415-0.496 --> 0.408  
Char. 114: 0.228-0.239 --> 0.131  
Char. 116: 0.163-0.185 --> 0.133  
Char. 117: 0.580 --> 0.496  
Char. 118: 0.172-0.176 --> 0.073  
Char. 119: 0.297 --> 0.220  
Char. 120: 0.332-0.352 --> 0.198  
Char. 121: 0.104-0.170 --> 0.014  
Char. 122: 0.651 --> 0.715  
Char. 132: 0.473-0.538 --> 0.000  
Char. 135: 0.365 --> 0.388  
Char. 136: 0.199 --> 0.000  
Char. 137: 0.291-0.318 --> 0.353  
Char. 138: 0.431 --> 0.455  
Char. 227: 0.110 --> 0.045  
Char. 230: 0.285 --> 0.142  
Char. 235: 0.300 --> 0.159  
Char. 236: 0.041 --> 0.020  
Char. 237: 0.270 --> 0.463  
Char. 239: 0.500 --> 0.700  
Char. 240: 0.416 --> 0.000  
Char. 324: 0.721-0.732 --> 0.605  
Char. 326: 0.120 --> 0.062  
Char. 327: 0.495 --> 0.483  
Char. 328: 0.494-0.612 --> 0.643  
Char. 330: 0.790 --> 0.752  
Char. 331: 0.469 --> 0.439  
Char. 332: 0.720 --> 0.688  
Char. 334: 0.131 --> 0.145  
Char. 336: 0.252 --> 0.301  
Char. 337: 0.289 --> 0.313

Char. 339: 0.735 --> 0.586  
Char. 340: 0.348-0.630 --> 0.307  
Char. 341: 0.296 --> 0.325  
Char. 343: 0.284 --> 0.367  
Char. 345: 0.375 --> 0.361  
Char. 348: 0.403 --> 0.467  
Char. 349: 0.458 --> 0.380  
Char. 353: 0.254-0.363 --> 0.078  
Char. 354: 0.340 --> 0.127  
Char. 356: 0.328 --> 0.259  
Char. 358: 0.282 --> 0.262  
Char. 360: 0.377 --> 0.240  
Char. 361: 0.316 --> 0.304  
Char. 362: 0.764 --> 0.878  
Char. 363: 0.771 --> 0.779  
Char. 364: 0.588 --> 0.668  
Char. 367: 0.680-0.689 --> 0.000  
Char. 368: 0.535 --> 0.701  
Char. 369: 0.379-0.388 --> 0.363  
Char. 370: 0.431-0.442 --> 0.538  
Char. 418: 1 --> 0  
Char. 450: 1 --> 0  
Char. 457: 1 --> 0  
Char. 490: 1 --> 2  
Char. 610: 1 --> 0

Cro\_Magnon\_I\_II\_III :

Char. 0: 0.805 --> 0.905  
Char. 4: 0.222-0.326 --> 0.142  
Char. 5: 0.534 --> 0.602  
Char. 7: 0.299-0.351 --> 0.353  
Char. 8: 0.339-0.438 --> 0.454  
Char. 9: 0.350-0.381 --> 0.485  
Char. 10: 0.388-0.517 --> 0.558  
Char. 11: 0.113-0.149 --> 0.086  
Char. 13: 0.479-0.525 --> 0.591  
Char. 14: 0.411 --> 0.443  
Char. 15: 0.140 --> 0.246  
Char. 16: 0.139 --> 0.212  
Char. 18: 0.194-0.204 --> 0.340  
Char. 23: 0.677-0.788 --> 0.627  
Char. 25: 0.086 --> 0.074

Char. 27: 0.243 --> 0.296  
Char. 30: 0.331 --> 0.617  
Char. 31: 0.234-0.243 --> 0.418  
Char. 33: 0.402-0.437 --> 0.455  
Char. 35: 0.750-0.781 --> 0.877  
Char. 36: 0.723-0.800 --> 0.936  
Char. 39: 0.492 --> 0.615  
Char. 40: 0.440-0.446 --> 0.453  
Char. 41: 0.192 --> 0.173  
Char. 42: 0.780 --> 0.966  
Char. 43: 0.774 --> 0.918  
Char. 44: 0.807 --> 0.964  
Char. 46: 0.665 --> 0.787  
Char. 48: 0.326 --> 0.238  
Char. 52: 0.379-0.450 --> 0.500  
Char. 56: 0.453-0.624 --> 0.405  
Char. 57: 0.514 --> 0.631  
Char. 58: 0.822-0.838 --> 0.864  
Char. 60: 0.304 --> 0.181  
Char. 61: 0.689-0.797 --> 0.606  
Char. 62: 0.120-0.185 --> 0.289  
Char. 64: 0.337-0.360 --> 0.512  
Char. 65: 0.338-0.497 --> 0.323  
Char. 66: 0.291-0.392 --> 0.285  
Char. 67: 0.428 --> 0.498  
Char. 68: 0.392 --> 0.433  
Char. 70: 0.138-0.207 --> 0.078  
Char. 71: 0.495-0.547 --> 0.626  
Char. 74: 0.632 --> 0.760  
Char. 75: 0.295 --> 0.278  
Char. 76: 0.493 --> 0.701  
Char. 80: 0.738-0.758 --> 0.851  
Char. 81: 0.219-0.283 --> 0.348  
Char. 88: 0.492 --> 0.463  
Char. 93: 0.188-0.274 --> 0.177  
Char. 97: 0.320 --> 0.282  
Char. 101: 0.721 --> 0.681  
Char. 102: 0.552 --> 0.491  
Char. 104: 0.787 --> 0.703  
Char. 105: 0.194-0.228 --> 0.230  
Char. 110: 0.120 --> 0.000

Char. 111: 0.101-0.105 --> 0.000  
Char. 112: 0.162 --> 0.134  
Char. 116: 0.185-0.264 --> 0.290  
Char. 118: 0.212-0.242 --> 0.340  
Char. 120: 0.284 --> 0.237  
Char. 122: 0.415 --> 0.327  
Char. 123: 0.807 --> 0.803  
Char. 124: 0.455 --> 0.344  
Char. 129: 0.290-0.337 --> 0.233  
Char. 130: 0.446-0.463 --> 0.683  
Char. 131: 0.291-0.366 --> 0.626  
Char. 133: 0.303-0.338 --> 0.565  
Char. 134: 0.331 --> 0.514  
Char. 136: 0.237 --> 0.214  
Char. 137: 0.285 --> 0.123  
Char. 138: 0.430 --> 0.709  
Char. 228: 0.423-0.490 --> 0.420  
Char. 229: 0.666 --> 0.333  
Char. 238: 0.274 --> 0.101  
Char. 241: 0.100 --> 0.000  
Char. 322: 0.808-0.907 --> 0.779  
Char. 324: 0.614 --> 0.598  
Char. 327: 0.495-0.562 --> 0.392  
Char. 331: 0.475 --> 0.454  
Char. 334: 0.169 --> 0.172  
Char. 336: 0.194-0.219 --> 0.247  
Char. 337: 0.175-0.179 --> 0.252  
Char. 338: 0.376 --> 0.172  
Char. 339: 0.731-0.850 --> 0.671  
Char. 340: 0.348-0.630 --> 0.243  
Char. 344: 0.118 --> 0.038  
Char. 345: 0.345 --> 0.342  
Char. 347: 0.384-0.513 --> 0.520  
Char. 348: 0.423-0.478 --> 0.721  
Char. 349: 0.463-0.499 --> 0.460  
Char. 352: 0.268 --> 0.115  
Char. 353: 0.302-0.406 --> 0.415  
Char. 354: 0.307-0.410 --> 0.493  
Char. 356: 0.309-0.328 --> 0.153  
Char. 357: 0.219 --> 0.160  
Char. 360: 0.273 --> 0.204

Char. 362: 0.501 --> 0.322  
Char. 363: 0.567 --> 0.322  
Char. 364: 0.437 --> 0.373  
Char. 366: 0.638 --> 1.000  
Char. 367: 0.693 --> 0.699  
Char. 369: 0.379-0.409 --> 0.142  
Char. 370: 0.431-0.442 --> 0.019  
Char. 371: 0.196 --> 0.215  
Char. 372: 0.229 --> 0.278  
Char. 420: 1 --> 0  
Char. 438: 1 --> 2  
Char. 444: 2 --> 4  
Char. 447: 0 --> 1

Oase\_1\_2 :

Char. 2: 0.142-0.222 --> 0.238  
Char. 8: 0.339-0.438 --> 0.505  
Char. 9: 0.350-0.381 --> 0.418  
Char. 10: 0.388-0.517 --> 0.535  
Char. 15: 0.091-0.140 --> 0.000  
Char. 18: 0.126-0.204 --> 0.000  
Char. 19: 0.615-0.738 --> 0.593  
Char. 20: 0.616-0.642 --> 0.609  
Char. 21: 0.725 --> 0.541  
Char. 23: 0.677-0.726 --> 0.667  
Char. 27: 0.243 --> 0.264  
Char. 30: 0.297-0.331 --> 0.233  
Char. 31: 0.170-0.243 --> 0.072  
Char. 32: 0.335-0.355 --> 0.305  
Char. 33: 0.402-0.437 --> 0.081  
Char. 39: 0.444-0.492 --> 0.539  
Char. 42: 0.538-0.634 --> 0.400  
Char. 43: 0.554-0.646 --> 0.341  
Char. 44: 0.790-0.807 --> 0.679  
Char. 46: 0.644-0.665 --> 0.726  
Char. 47: 0.366-0.499 --> 0.352  
Char. 48: 0.326-0.429 --> 0.265  
Char. 49: 0.558-0.567 --> 0.510  
Char. 51: 0.742-0.809 --> 0.848  
Char. 54: 0.558-0.579 --> 0.649  
Char. 57: 0.514 --> 0.311  
Char. 58: 0.822-0.838 --> 0.771

Char. 59: 0.864-0.890 --> 0.856  
Char. 60: 0.497-0.530 --> 0.667  
Char. 62: 0.111-0.185 --> 0.105  
Char. 64: 0.337-0.360 --> 0.371  
Char. 70: 0.138-0.207 --> 0.063  
Char. 71: 0.547 --> 0.575  
Char. 72: 0.170-0.179 --> 0.121  
Char. 73: 0.326-0.355 --> 0.420  
Char. 74: 0.582-0.594 --> 0.396  
Char. 75: 0.295-0.346 --> 0.377  
Char. 77: 0.324-0.333 --> 0.259  
Char. 78: 0.117-0.163 --> 0.000  
Char. 79: 0.292-0.319 --> 0.400  
Char. 93: 0.188 --> 0.126  
Char. 95: 0.207 --> 0.159  
Char. 101: 0.721 --> 0.722  
Char. 102: 0.552-0.670 --> 0.673  
Char. 107: 0.178-0.254 --> 0.269  
Char. 109: 0.381-0.387 --> 0.316  
Char. 113: 0.415-0.496 --> 0.385  
Char. 114: 0.228-0.240 --> 0.292  
Char. 117: 0.580 --> 0.641  
Char. 119: 0.302-0.303 --> 0.377  
Char. 120: 0.332-0.353 --> 0.450  
Char. 121: 0.104-0.170 --> 0.263  
Char. 122: 0.651 --> 0.724  
Char. 128: 0.292-0.406 --> 0.260  
Char. 140: 0.420 --> 0.660  
Char. 141: 0.339-0.374 --> 0.800  
Char. 145: 0.669 --> 0.672  
Char. 146: 0.606-0.783 --> 1.000  
Char. 147: 0.638-0.669 --> 1.000  
Char. 150: 0.335-0.577 --> 0.000  
Char. 152: 0.365-0.567 --> 0.841  
Char. 153: 0.412-0.424 --> 0.680  
Char. 157: 0.625-0.645 --> 0.480  
Char. 159: 0.614-0.680 --> 0.557  
Char. 165: 0.466-0.533 --> 0.456  
Char. 173: 0.714 --> 0.761  
Char. 174: 0.369-0.451 --> 0.567  
Char. 179: 0.901-0.950 --> 0.996

Char. 180: 0.120 --> 0.000  
Char. 181: 0.034-0.117 --> 0.000  
Char. 182: 0.045-0.133 --> 0.018  
Char. 183: 0.003-0.216 --> 0.000  
Char. 184: 0.073-0.274 --> 0.000  
Char. 188: 0.427-0.482 --> 0.364  
Char. 226: 0.383-0.534 --> 0.545  
Char. 227: 0.200 --> 0.338  
Char. 229: 0.666 --> 0.777  
Char. 235: 0.300-0.314 --> 0.560  
Char. 236: 0.178 --> 0.297  
Char. 237: 0.270 --> 0.237  
Char. 238: 0.274 --> 0.537  
Char. 241: 0.100 --> 0.500  
Char. 245: 0.124-0.245 --> 0.368  
Char. 246: 0.196-0.206 --> 0.332  
Char. 247: 0.070-0.401 --> 0.054  
Char. 248: 0.301-0.309 --> 0.448  
Char. 251: 0.083-0.250 --> 0.916  
Char. 253: 0.125-0.375 --> 1.000  
Char. 298: 0.472-0.661 --> 0.767  
Char. 300: 0.404-0.420 --> 0.208  
Char. 301: 0.658 --> 1.000  
Char. 320: 0.147-0.266 --> 0.079  
Char. 323: 0.652-0.878 --> 0.929  
Char. 325: 0.318-0.365 --> 0.483  
Char. 326: 0.144-0.316 --> 0.376  
Char. 331: 0.558-0.559 --> 0.660  
Char. 332: 0.769-0.825 --> 0.893  
Char. 335: 0.337-0.484 --> 0.554  
Char. 338: 0.506-0.536 --> 0.677  
Char. 343: 0.153-0.284 --> 0.136  
Char. 346: 0.317-0.424 --> 0.436  
Char. 348: 0.377-0.403 --> 0.360  
Char. 352: 0.268-0.274 --> 0.300  
Char. 356: 0.328 --> 0.365  
Char. 359: 0.574-0.677 --> 0.728  
Char. 360: 0.377-0.412 --> 0.453  
Char. 361: 0.316 --> 0.327  
Char. 362: 0.764 --> 1.000  
Char. 363: 0.771 --> 1.000

Char. 364: 0.588 --> 0.732  
Char. 369: 0.379-0.409 --> 0.423  
Char. 370: 0.431-0.442 --> 0.672  
Char. 371: 0.196 --> 0.163  
Char. 372: 0.229 --> 0.204  
Char. 375: 0.462-0.669 --> 0.421  
Char. 376: 0.719-0.779 --> 1.000  
Char. 378: 0.509-0.742 --> 0.379  
Char. 379: 0.801-0.848 --> 0.879  
Char. 380: 0.438-0.614 --> 0.617  
Char. 381: 0.754-0.795 --> 0.834  
Char. 385: 0.486-0.588 --> 0.033  
Char. 392: 0.425-0.487 --> 0.353  
Char. 398: 0.084-0.112 --> 0.016  
Char. 425: 1 --> 0  
Char. 430: 1 --> 0  
Char. 446: 1 --> 2  
Char. 462: 1 --> 0  
Char. 463: 2 --> 0  
Char. 473: 2 --> 0  
Char. 486: 1 --> 0  
Char. 491: 2 --> 0  
Char. 500: 0 --> 1  
Char. 516: 2 --> 1  
Char. 521: 1 --> 0  
Char. 525: 2 --> 0  
Char. 533: 0 --> 1  
Char. 536: 1 --> 0  
Char. 540: 0 --> 1  
Char. 544: 1 --> 2  
Char. 545: 0 --> 1  
Char. 561: 1 --> 0  
Char. 563: 2 --> 1  
Char. 581: 2 --> 1  
Char. 587: 1 --> 0  
Char. 609: 3 --> 2  
Char. 612: 3 --> 2  
Char. 629: 1 --> 2

ZKD\_UC\_101\_103 :

Char. 5: 0.463-0.515 --> 0.291  
Char. 7: 0.299-0.351 --> 0.205

Char. 8: 0.339-0.371 --> 0.279  
Char. 9: 0.350-0.381 --> 0.270  
Char. 11: 0.147-0.166 --> 0.329  
Char. 20: 0.737-0.756 --> 0.763  
Char. 22: 0.584-0.666 --> 0.728  
Char. 23: 0.677-0.788 --> 0.810  
Char. 25: 0.223 --> 0.224  
Char. 29: 0.634-0.637 --> 0.860  
Char. 35: 0.750-0.781 --> 0.804  
Char. 36: 0.723-0.800 --> 0.842  
Char. 38: 0.365-0.369 --> 0.407  
Char. 39: 0.444-0.492 --> 0.417  
Char. 48: 0.429 --> 0.494  
Char. 49: 0.746 --> 0.802  
Char. 53: 0.378-0.460 --> 0.559  
Char. 56: 0.453-0.534 --> 0.332  
Char. 58: 0.822-0.838 --> 0.903  
Char. 59: 0.864-0.890 --> 0.892  
Char. 65: 0.338-0.497 --> 0.754  
Char. 67: 0.312-0.428 --> 0.521  
Char. 68: 0.346-0.392 --> 0.611  
Char. 69: 0.389-0.473 --> 0.658  
Char. 71: 0.495-0.502 --> 0.493  
Char. 73: 0.326-0.355 --> 0.399  
Char. 75: 0.346 --> 0.420  
Char. 77: 0.333 --> 0.353  
Char. 79: 0.292-0.319 --> 0.143  
Char. 98: 0.666-0.790 --> 0.931  
Char. 100: 0.072-0.073 --> 0.034  
Char. 102: 0.552-0.670 --> 0.687  
Char. 103: 0.094-0.134 --> 0.047  
Char. 104: 0.787 --> 0.791  
Char. 106: 0.319-0.339 --> 0.202  
Char. 107: 0.152-0.254 --> 0.130  
Char. 113: 0.450-0.549 --> 0.569  
Char. 117: 0.543-0.580 --> 0.596  
Char. 123: 0.840-0.855 --> 0.862  
Char. 124: 0.455 --> 0.495  
Char. 127: 0.276-0.299 --> 0.257  
Char. 129: 0.337 --> 0.435  
Char. 130: 0.446 --> 0.331

Char. 131: 0.291-0.366 --> 0.718  
Char. 132: 0.544 --> 0.548  
Char. 133: 0.303-0.338 --> 0.396  
Char. 134: 0.246-0.331 --> 0.651  
Char. 137: 0.305-0.334 --> 0.349  
Char. 138: 0.430 --> 0.365  
Char. 139: 0.129-0.149 --> 0.179  
Char. 140: 0.420 --> 0.633  
Char. 141: 0.339-0.374 --> 0.415  
Char. 142: 0.382 --> 0.338  
Char. 143: 0.696 --> 0.317  
Char. 147: 0.638-0.669 --> 0.417  
Char. 148: 0.611-0.691 --> 0.856  
Char. 149: 0.458-0.596 --> 0.704  
Char. 152: 0.365-0.567 --> 0.743  
Char. 155: 0.374 --> 0.363  
Char. 166: 0.913 --> 0.926  
Char. 167: 0.812 --> 0.849  
Char. 168: 0.048-0.080 --> 0.000  
Char. 173: 0.714 --> 0.759  
Char. 174: 0.228-0.364 --> 0.226  
Char. 180: 0.120 --> 0.094  
Char. 190: 0.101-0.112 --> 0.000  
Char. 194: 0.428-0.571 --> 1.000  
Char. 197: 0.250-0.500 --> 0.000  
Char. 199: 0.236 --> 0.000  
Char. 200: 0.413-0.421 --> 0.000  
Char. 201: 0.330-0.435 --> 0.002  
Char. 202: 0.750 --> 1.000  
Char. 208: 0.648-0.800 --> 0.803  
Char. 209: 0.458 --> 0.554  
Char. 214: 0.176-0.198 --> 0.060  
Char. 216: 0.466-0.491 --> 0.705  
Char. 220: 0.210 --> 0.012  
Char. 221: 0.108-0.113 --> 0.084  
Char. 222: 0.398-0.452 --> 0.755  
Char. 227: 0.200 --> 0.159  
Char. 236: 0.178 --> 0.131  
Char. 241: 0.100 --> 0.000  
Char. 245: 0.124-0.206 --> 0.010  
Char. 247: 0.401 --> 1.000

Char. 248: 0.301-0.309 --> 0.286  
Char. 249: 0.300-0.400 --> 0.500  
Char. 271: 0.176-0.248 --> 0.023  
Char. 272: 0.281-0.295 --> 0.188  
Char. 273: 0.619-0.623 --> 0.733  
Char. 276: 0.242-0.313 --> 0.145  
Char. 277: 0.170-0.232 --> 0.136  
Char. 278: 0.284-0.286 --> 0.327  
Char. 281: 0.205-0.334 --> 0.173  
Char. 283: 0.575 --> 0.755  
Char. 291: 0.489 --> 0.542  
Char. 293: 0.250 --> 0.125  
Char. 297: 0.666 --> 0.000  
Char. 298: 0.392 --> 0.282  
Char. 300: 0.404-0.420 --> 0.624  
Char. 302: 0.250 --> 0.125  
Char. 323: 0.547-0.658 --> 0.273  
Char. 324: 0.670-0.721 --> 0.735  
Char. 326: 0.144-0.146 --> 0.094  
Char. 327: 0.495-0.562 --> 0.583  
Char. 328: 0.494-0.612 --> 0.808  
Char. 329: 0.581-0.656 --> 0.798  
Char. 331: 0.558-0.559 --> 0.571  
Char. 332: 0.769-0.825 --> 0.829  
Char. 333: 0.442-0.574 --> 0.717  
Char. 334: 0.112-0.128 --> 0.078  
Char. 336: 0.173-0.219 --> 0.171  
Char. 340: 0.348-0.630 --> 0.715  
Char. 341: 0.252-0.255 --> 0.411  
Char. 342: 0.473-0.560 --> 0.464  
Char. 345: 0.446 --> 0.586  
Char. 348: 0.478 --> 0.657  
Char. 350: 0.226-0.321 --> 0.353  
Char. 352: 0.268-0.274 --> 0.056  
Char. 355: 0.276-0.300 --> 0.141  
Char. 357: 0.219 --> 0.218  
Char. 361: 0.286-0.316 --> 0.321  
Char. 365: 0.380-0.570 --> 0.245  
Char. 366: 0.579-0.638 --> 0.822  
Char. 370: 0.431-0.442 --> 0.585  
Char. 373: 0.653-0.717 --> 0.746

Char. 374: 0.226-0.307 --> 0.092  
Char. 377: 0.288-0.301 --> 0.282  
Char. 379: 0.824-0.848 --> 0.864  
Char. 384: 0.612-0.633 --> 0.956  
Char. 385: 0.486-0.588 --> 0.123  
Char. 388: 0.595-0.839 --> 0.964  
Char. 392: 0.611 --> 0.943  
Char. 393: 0.909-0.940 --> 1.000  
Char. 394: 0.650-0.658 --> 0.702  
Char. 436: 0 --> 1  
Char. 438: 1 --> 2  
Char. 469: 0 --> 23  
Char. 472: 0 --> 1  
Char. 477: 0 --> 1  
Char. 536: 1 --> 2  
Char. 540: 0 --> 1  
Char. 549: 0 --> 1  
Char. 555: 1 --> 2  
Char. 574: 0 --> 1  
Char. 580: 1 --> 2  
Char. 581: 2 --> 1  
Char. 583: 0 --> 1  
Char. 587: 1 --> 0

Liujiang :

Char. 1: 0.161-0.171 --> 0.000  
Char. 2: 0.142 --> 0.014  
Char. 3: 0.148 --> 0.000  
Char. 6: 0.714 --> 0.840  
Char. 7: 0.299-0.351 --> 0.148  
Char. 8: 0.339-0.438 --> 0.329  
Char. 9: 0.350-0.381 --> 0.225  
Char. 12: 0.209-0.237 --> 0.122  
Char. 13: 0.479-0.525 --> 0.090  
Char. 14: 0.411 --> 0.107  
Char. 19: 0.738 --> 1.000  
Char. 20: 0.616 --> 0.575  
Char. 21: 0.725-0.764 --> 0.700  
Char. 23: 0.677-0.788 --> 0.851  
Char. 26: 0.236 --> 0.228  
Char. 27: 0.243 --> 0.158  
Char. 28: 0.223-0.287 --> 0.199



Char. 29: 0.637 --> 0.641  
Char. 32: 0.335-0.393 --> 0.320  
Char. 33: 0.402-0.437 --> 0.000  
Char. 34: 0.163 --> 0.027  
Char. 35: 0.750-0.781 --> 0.685  
Char. 37: 0.116 --> 0.064  
Char. 38: 0.365 --> 0.052  
Char. 40: 0.440-0.446 --> 0.426  
Char. 45: 0.755 --> 0.728  
Char. 47: 0.366 --> 0.313  
Char. 49: 0.558-0.679 --> 0.390  
Char. 50: 0.803 --> 0.000  
Char. 51: 0.742-0.805 --> 0.574  
Char. 52: 0.379-0.450 --> 0.336  
Char. 53: 0.361-0.422 --> 0.254  
Char. 54: 0.495-0.536 --> 0.299  
Char. 55: 0.341-0.364 --> 0.405  
Char. 57: 0.514 --> 0.000  
Char. 61: 0.689-0.797 --> 0.841  
Char. 63: 0.764-0.826 --> 0.929  
Char. 64: 0.337-0.360 --> 0.203  
Char. 65: 0.338-0.497 --> 0.602  
Char. 66: 0.291-0.392 --> 0.484  
Char. 69: 0.473 --> 0.594  
Char. 70: 0.138-0.207 --> 0.398  
Char. 71: 0.495-0.547 --> 0.464  
Char. 72: 0.172-0.179 --> 0.201  
Char. 73: 0.326-0.355 --> 0.241  
Char. 77: 0.324 --> 0.157  
Char. 80: 0.738-0.758 --> 0.157  
Char. 81: 0.219-0.283 --> 0.114  
Char. 82: 0.452-0.546 --> 0.321  
Char. 84: 0.037 --> 0.000  
Char. 85: 0.115 --> 0.000  
Char. 86: 0.163 --> 0.089  
Char. 87: 0.346 --> 0.324  
Char. 89: 0.110 --> 0.000  
Char. 90: 0.177-0.206 --> 0.013  
Char. 94: 0.018-0.078 --> 0.013  
Char. 95: 0.207-0.234 --> 0.109  
Char. 96: 0.048 --> 0.000

Char. 98: 0.790 --> 0.938  
Char. 99: 0.146 --> 0.041  
Char. 100: 0.072 --> 0.026  
Char. 101: 0.721 --> 0.799  
Char. 103: 0.094 --> 0.078  
Char. 104: 0.787 --> 0.810  
Char. 105: 0.194-0.228 --> 0.046  
Char. 106: 0.339 --> 0.464  
Char. 107: 0.152 --> 0.137  
Char. 108: 0.261-0.337 --> 0.050  
Char. 109: 0.381-0.387 --> 0.000  
Char. 113: 0.415 --> 0.306  
Char. 114: 0.106 --> 0.094  
Char. 115: 0.089 --> 0.040  
Char. 116: 0.185-0.264 --> 0.000  
Char. 117: 0.462 --> 0.000  
Char. 119: 0.277 --> 0.269  
Char. 121: 0.089 --> 0.006  
Char. 124: 0.455 --> 0.589  
Char. 125: 0.080 --> 0.030  
Char. 126: 0.509-0.526 --> 0.533  
Char. 127: 0.299 --> 0.460  
Char. 128: 0.341-0.421 --> 0.484  
Char. 129: 0.290-0.337 --> 0.340  
Char. 130: 0.446-0.463 --> 0.425  
Char. 132: 0.460 --> 0.406  
Char. 133: 0.303-0.338 --> 0.156  
Char. 135: 0.145 --> 0.086  
Char. 138: 0.430 --> 0.378  
Char. 139: 0.090 --> 0.083  
Char. 228: 0.423-0.490 --> 1.000  
Char. 229: 0.666 --> 0.777  
Char. 230: 0.571 --> 0.285  
Char. 233: 0.000 --> 0.666  
Char. 234: 0.000 --> 1.000  
Char. 237: 0.918 --> 1.000  
Char. 238: 0.274 --> 0.319  
Char. 239: 0.500 --> 0.600  
Char. 240: 0.583 --> 0.666  
Char. 320: 0.341 --> 0.409  
Char. 321: 0.630 --> 0.575

Char. 322: 0.808-0.907 --> 0.933  
Char. 325: 0.318 --> 0.233  
Char. 326: 0.144 --> 0.076  
Char. 327: 0.495-0.562 --> 0.634  
Char. 329: 0.581-0.656 --> 0.769  
Char. 332: 0.769-0.825 --> 0.731  
Char. 333: 0.442 --> 0.229  
Char. 335: 0.484 --> 0.560  
Char. 339: 0.731-0.850 --> 0.876  
Char. 340: 0.348-0.630 --> 0.716  
Char. 341: 0.250-0.255 --> 0.366  
Char. 342: 0.659 --> 0.737  
Char. 343: 0.230-0.353 --> 0.442  
Char. 346: 0.188 --> 0.120  
Char. 349: 0.463-0.499 --> 0.584  
Char. 350: 0.164 --> 0.163  
Char. 351: 0.357 --> 0.356  
Char. 353: 0.302-0.406 --> 0.000  
Char. 354: 0.307-0.410 --> 0.227  
Char. 355: 0.455 --> 0.663  
Char. 356: 0.309-0.328 --> 0.419  
Char. 357: 0.219 --> 0.296  
Char. 358: 0.549 --> 0.555  
Char. 361: 0.286 --> 0.000  
Char. 365: 0.570 --> 0.823  
Char. 368: 0.308 --> 0.292  
Char. 369: 0.379-0.409 --> 0.474  
Char. 371: 0.196 --> 0.095  
Char. 372: 0.229 --> 0.123  
Char. 406: 12 --> 3  
Char. 426: 1 --> 0  
Char. 429: 1 --> 2  
Char. 436: 0 --> 1  
Char. 497: 2 --> 1  
Char. 613: 1 --> 3

SH4\_5 :

Char. 1: 0.185 --> 0.183  
Char. 2: 0.298-0.347 --> 0.352  
Char. 3: 0.354-0.357 --> 0.400  
Char. 4: 0.418-0.443 --> 0.408  
Char. 12: 0.325 --> 0.297

Char. 14: 0.268-0.374 --> 0.168  
Char. 15: 0.342-0.388 --> 0.468  
Char. 16: 0.345-0.484 --> 0.710  
Char. 17: 0.371-0.433 --> 0.521  
Char. 18: 0.474 --> 0.577  
Char. 20: 0.758-0.806 --> 0.870  
Char. 23: 0.774-0.811 --> 0.870  
Char. 24: 0.355-0.362 --> 0.465  
Char. 25: 0.344-0.382 --> 0.463  
Char. 26: 0.432-0.456 --> 0.478  
Char. 27: 0.340-0.388 --> 0.333  
Char. 28: 0.301-0.515 --> 0.000  
Char. 29: 0.496-0.522 --> 0.581  
Char. 31: 0.212 --> 0.143  
Char. 32: 0.452-0.462 --> 0.715  
Char. 33: 0.402-0.437 --> 1.000  
Char. 34: 0.370-0.399 --> 0.454  
Char. 35: 0.351-0.466 --> 0.346  
Char. 37: 0.297-0.356 --> 0.404  
Char. 42: 0.425-0.481 --> 0.241  
Char. 43: 0.368-0.506 --> 0.195  
Char. 46: 0.445-0.498 --> 0.390  
Char. 47: 0.595 --> 0.554  
Char. 48: 0.524 --> 0.582  
Char. 54: 0.424 --> 0.925  
Char. 55: 0.364-0.401 --> 0.091  
Char. 56: 0.507-0.557 --> 0.743  
Char. 57: 0.423 --> 0.294  
Char. 59: 0.536-0.552 --> 0.612  
Char. 60: 0.544-0.697 --> 0.810  
Char. 61: 0.461-0.503 --> 0.448  
Char. 63: 0.518-0.540 --> 0.448  
Char. 69: 0.144-0.224 --> 0.092  
Char. 70: 0.230-0.295 --> 0.549  
Char. 72: 0.250-0.265 --> 0.522  
Char. 73: 0.355 --> 0.449  
Char. 74: 0.477-0.482 --> 0.995  
Char. 80: 0.756 --> 0.804  
Char. 81: 0.450 --> 0.551  
Char. 84: 0.257-0.322 --> 0.384  
Char. 92: 0.427-0.470 --> 0.600

Char. 93: 0.298-0.390 --> 0.254  
Char. 98: 0.460-0.695 --> 0.435  
Char. 100: 0.230 --> 0.316  
Char. 101: 0.543-0.592 --> 0.499  
Char. 103: 0.287-0.291 --> 0.404  
Char. 104: 0.618-0.718 --> 0.577  
Char. 105: 0.315-0.365 --> 0.571  
Char. 106: 0.326-0.769 --> 0.945  
Char. 107: 0.375-0.723 --> 0.822  
Char. 111: 0.471-0.513 --> 0.638  
Char. 112: 0.476-0.755 --> 1.000  
Char. 114: 0.332-0.373 --> 0.492  
Char. 115: 0.370-0.373 --> 0.384  
Char. 116: 0.494-0.566 --> 0.631  
Char. 117: 0.592-0.641 --> 0.733  
Char. 118: 0.356-0.471 --> 0.837  
Char. 119: 0.369-0.430 --> 0.728  
Char. 120: 0.433-0.491 --> 0.828  
Char. 121: 0.268-0.295 --> 0.450  
Char. 122: 0.339-0.462 --> 0.123  
Char. 123: 0.845-0.855 --> 0.765  
Char. 125: 0.206-0.245 --> 0.341  
Char. 127: 0.484-0.624 --> 0.816  
Char. 128: 0.417-0.461 --> 0.582  
Char. 130: 0.620-0.630 --> 0.635  
Char. 131: 0.337-0.403 --> 0.698  
Char. 133: 0.472-0.488 --> 0.596  
Char. 134: 0.210-0.429 --> 0.450  
Char. 136: 0.243 --> 0.343  
Char. 137: 0.413-0.455 --> 0.499  
Char. 139: 0.384-0.440 --> 0.674  
Char. 140: 0.341-0.359 --> 0.234  
Char. 141: 0.402-0.564 --> 0.723  
Char. 145: 0.341-0.346 --> 0.251  
Char. 146: 0.545-0.714 --> 0.794  
Char. 147: 0.377-0.589 --> 0.718  
Char. 148: 0.498-0.531 --> 0.237  
Char. 149: 0.458-0.564 --> 0.114  
Char. 150: 0.535-0.656 --> 0.362  
Char. 151: 0.327 --> 0.273  
Char. 154: 0.228-0.236 --> 0.077

Char. 156: 0.199-0.401 --> 0.108  
Char. 157: 0.548-0.608 --> 0.673  
Char. 158: 0.592-0.594 --> 0.734  
Char. 159: 0.582-0.616 --> 0.819  
Char. 160: 0.715-0.794 --> 0.821  
Char. 161: 0.658-0.815 --> 1.000  
Char. 162: 0.931 --> 0.953  
Char. 163: 0.699-0.826 --> 0.582  
Char. 164: 0.428-0.479 --> 0.000  
Char. 165: 0.704-0.726 --> 0.587  
Char. 166: 0.906 --> 0.766  
Char. 168: 0.312-0.372 --> 0.203  
Char. 170: 0.486-0.565 --> 0.718  
Char. 175: 0.696-0.702 --> 0.837  
Char. 176: 0.585-0.706 --> 0.874  
Char. 177: 0.475-0.480 --> 0.686  
Char. 178: 0.508-0.583 --> 0.467  
Char. 179: 0.729-0.762 --> 0.513  
Char. 185: 0.276-0.400 --> 0.181  
Char. 188: 0.392-0.414 --> 0.532  
Char. 189: 0.119-0.240 --> 0.053  
Char. 192: 0.643 --> 0.844  
Char. 194: 0.571 --> 0.857  
Char. 228: 0.367-0.459 --> 0.500  
Char. 230: 0.428 --> 0.285  
Char. 235: 0.101-0.149 --> 0.066  
Char. 236: 0.049-0.133 --> 0.040  
Char. 237: 0.749 --> 0.753  
Char. 238: 0.081-0.154 --> 0.000  
Char. 246: 0.187-0.190 --> 0.221  
Char. 247: 0.317-0.348 --> 0.285  
Char. 248: 0.256-0.348 --> 0.414  
Char. 249: 0.200 --> 0.400  
Char. 250: 0.166-0.250 --> 0.000  
Char. 271: 0.064 --> 0.034  
Char. 272: 0.173-0.286 --> 0.000  
Char. 273: 0.619-0.623 --> 0.359  
Char. 276: 0.063-0.064 --> 0.030  
Char. 281: 0.058-0.061 --> 0.000  
Char. 282: 0.116-0.190 --> 0.025  
Char. 284: 0.375 --> 0.250

Char. 288: 0.066-0.200 --> 0.000  
Char. 289: 0.044-0.063 --> 0.020  
Char. 292: 0.388-0.491 --> 0.702  
Char. 298: 0.236-0.313 --> 0.165  
Char. 300: 0.589-0.655 --> 0.763  
Char. 301: 0.773-0.787 --> 0.865  
Char. 304: 0.285 --> 0.000  
Char. 320: 0.480-0.501 --> 0.664  
Char. 321: 0.782-0.836 --> 0.877  
Char. 324: 0.594-0.598 --> 0.551  
Char. 325: 0.250-0.348 --> 0.220  
Char. 329: 0.431-0.542 --> 0.584  
Char. 330: 0.536-0.572 --> 0.663  
Char. 331: 0.620-0.624 --> 1.000  
Char. 332: 0.395-0.450 --> 0.355  
Char. 338: 0.363-0.388 --> 0.654  
Char. 339: 0.526 --> 0.513  
Char. 344: 0.411-0.462 --> 0.565  
Char. 345: 0.579-0.849 --> 0.918  
Char. 346: 0.498 --> 0.574  
Char. 347: 0.132-0.134 --> 0.116  
Char. 348: 0.317-0.371 --> 0.619  
Char. 350: 0.635-0.666 --> 0.709  
Char. 352: 0.350 --> 0.438  
Char. 354: 0.481 --> 0.613  
Char. 355: 0.389-0.577 --> 0.700  
Char. 357: 0.293-0.397 --> 0.521  
Char. 360: 0.441-0.463 --> 0.711  
Char. 362: 0.337-0.341 --> 0.036  
Char. 363: 0.458-0.469 --> 0.217  
Char. 364: 0.359-0.388 --> 0.122  
Char. 365: 0.609-0.935 --> 1.000  
Char. 366: 0.410-0.585 --> 0.696  
Char. 368: 0.550-0.607 --> 0.440  
Char. 369: 0.437-0.522 --> 0.585  
Char. 371: 0.330-0.470 --> 0.723  
Char. 372: 0.414-0.557 --> 0.701  
Char. 373: 0.666 --> 0.719  
Char. 375: 0.263-0.362 --> 0.101  
Char. 377: 0.290-0.442 --> 0.603  
Char. 378: 0.608-0.627 --> 0.872

Char. 379: 0.845-0.848 --> 0.867  
Char. 380: 0.633-0.641 --> 0.674  
Char. 382: 0.624-0.709 --> 0.830  
Char. 383: 0.763-0.783 --> 0.850  
Char. 384: 0.468 --> 0.646  
Char. 385: 0.338-0.437 --> 0.000  
Char. 388: 0.475-0.515 --> 0.418  
Char. 389: 0.673-0.675 --> 0.647  
Char. 390: 0.347-0.365 --> 0.231  
Char. 392: 0.616-0.648 --> 1.000  
Char. 395: 0.247-0.330 --> 0.191  
Char. 396: 0.395-0.481 --> 0.135  
Char. 397: 0.199-0.218 --> 0.059  
Char. 399: 0.259-0.416 --> 0.068  
Char. 422: 2 --> 1  
Char. 447: 0 --> 1  
Char. 453: 1 --> 2  
Char. 457: 01 --> 2  
Char. 458: 1 --> 0  
Char. 459: 0 --> 1  
Char. 463: 2 --> 0  
Char. 474: 0 --> 1  
Char. 486: 0 --> 1  
Char. 488: 0 --> 2  
Char. 489: 0 --> 1  
Char. 490: 2 --> 0  
Char. 491: 1 --> 2  
Char. 495: 1 --> 0  
Char. 496: 1 --> 2  
Char. 501: 1 --> 0  
Char. 502: 2 --> 0  
Char. 507: 1 --> 0  
Char. 509: 1 --> 0  
Char. 516: 2 --> 1  
Char. 531: 0 --> 1  
Char. 542: 1 --> 2  
Char. 550: 2 --> 3  
Char. 563: 1 --> 0  
Char. 569: 1 --> 0  
Char. 580: 1 --> 0  
Char. 581: 2 --> 0

Char. 588: 0 --> 1  
Char. 605: 2 --> 1  
Char. 609: 3 --> 0  
Char. 613: 1 --> 0  
Char. 615: 1 --> 2  
Char. 617: 2 --> 1  
Char. 621: 1 --> 2

Tabun\_1 :

Char. 1: 0.196-0.272 --> 0.114  
Char. 4: 0.418-0.455 --> 0.189  
Char. 5: 0.121 --> 0.074  
Char. 17: 0.324 --> 0.364  
Char. 19: 0.629-0.651 --> 0.500  
Char. 24: 0.197 --> 0.385  
Char. 25: 0.315 --> 0.383  
Char. 27: 0.380 --> 0.891  
Char. 31: 0.259 --> 0.000  
Char. 34: 0.278 --> 0.389  
Char. 37: 0.249 --> 0.415  
Char. 39: 0.163-0.320 --> 0.120  
Char. 41: 0.527 --> 0.595  
Char. 47: 0.590 --> 0.490  
Char. 50: 0.632-0.667 --> 0.691  
Char. 62: 0.427 --> 0.309  
Char. 65: 0.076-0.131 --> 0.072  
Char. 66: 0.545 --> 0.557  
Char. 67: 0.161-0.177 --> 0.109  
Char. 68: 0.256-0.315 --> 0.169  
Char. 70: 0.219-0.232 --> 0.019  
Char. 71: 0.558-0.561 --> 1.000  
Char. 73: 0.348 --> 0.822  
Char. 74: 0.477-0.482 --> 0.688  
Char. 75: 0.327 --> 0.407  
Char. 77: 0.180-0.224 --> 0.252  
Char. 80: 0.298-0.725 --> 0.994  
Char. 82: 0.405-0.506 --> 0.359  
Char. 83: 0.316-0.334 --> 0.000  
Char. 87: 0.440-0.587 --> 0.329  
Char. 88: 0.592-0.703 --> 0.402  
Char. 93: 0.260-0.311 --> 0.204  
Char. 94: 0.177 --> 0.314

Char. 98: 0.581 --> 0.362  
Char. 103: 0.203-0.223 --> 0.246  
Char. 106: 0.448 --> 1.000  
Char. 110: 0.508 --> 0.497  
Char. 111: 0.574 --> 0.625  
Char. 112: 0.268-0.511 --> 0.766  
Char. 114: 0.382 --> 0.392  
Char. 115: 0.212-0.228 --> 0.103  
Char. 116: 0.246-0.284 --> 0.197  
Char. 118: 0.226-0.260 --> 0.344  
Char. 119: 0.375 --> 0.387  
Char. 120: 0.470 --> 0.475  
Char. 121: 0.275 --> 0.341  
Char. 123: 0.887 --> 0.883  
Char. 126: 0.414 --> 0.606  
Char. 127: 0.469-0.484 --> 1.000  
Char. 128: 0.371 --> 0.680  
Char. 137: 0.441 --> 0.764  
Char. 320: 0.423 --> 0.553  
Char. 325: 0.353 --> 1.000  
Char. 326: 0.180-0.311 --> 0.749  
Char. 330: 0.283-0.338 --> 0.554  
Char. 331: 0.394-0.613 --> 0.770  
Char. 334: 0.114-0.174 --> 0.106  
Char. 340: 0.400 --> 0.303  
Char. 345: 0.562 --> 0.644  
Char. 347: 0.116 --> 0.087  
Char. 350: 0.489-0.547 --> 0.560  
Char. 355: 0.389 --> 1.000  
Char. 357: 0.553 --> 0.561  
Char. 358: 0.378-0.692 --> 0.851  
Char. 359: 0.634 --> 0.638  
Char. 360: 0.480 --> 0.621  
Char. 361: 0.339 --> 0.331  
Char. 362: 0.552-0.797 --> 0.429  
Char. 363: 0.724-0.879 --> 0.601  
Char. 364: 0.621-0.662 --> 0.545  
Char. 369: 0.479 --> 0.984  
Char. 370: 0.447-0.545 --> 0.999  
Char. 414: 2 --> 0  
Char. 445: 1 --> 2

Char. 450: 1 --> 0  
Char. 458: 0 --> 1  
Char. 473: 2 --> 1  
Char. 482: 2 --> 1

Tabun\_2 :

Char. 140: 0.341-0.420 --> 0.138  
Char. 145: 0.669 --> 0.894  
Char. 147: 0.638-0.669 --> 0.822  
Char. 150: 0.656 --> 0.852  
Char. 152: 0.365-0.567 --> 0.176  
Char. 153: 0.412-0.424 --> 0.305  
Char. 156: 0.218-0.426 --> 0.209  
Char. 157: 0.625-0.645 --> 0.906  
Char. 158: 0.698-0.732 --> 0.861  
Char. 159: 0.726-0.825 --> 0.971  
Char. 160: 0.756-0.822 --> 1.000  
Char. 161: 0.768 --> 0.938  
Char. 163: 0.699-0.772 --> 0.635  
Char. 164: 0.428 --> 0.207  
Char. 172: 0.353-0.413 --> 0.343  
Char. 177: 0.335-0.349 --> 0.281  
Char. 178: 0.508-0.596 --> 0.446  
Char. 179: 0.729 --> 0.569  
Char. 180: 0.296 --> 0.336  
Char. 181: 0.144-0.166 --> 0.366  
Char. 182: 0.165-0.321 --> 0.327  
Char. 188: 0.573-0.702 --> 0.774  
Char. 189: 0.377 --> 0.824  
Char. 255: 0.395-0.434 --> 0.443  
Char. 256: 0.231-0.479 --> 0.623  
Char. 257: 0.575-0.588 --> 0.650  
Char. 258: 0.342-0.477 --> 1.000  
Char. 261: 0.184-0.381 --> 0.612  
Char. 262: 0.039-0.140 --> 0.647  
Char. 264: 0.340-0.377 --> 0.770  
Char. 267: 0.209-0.241 --> 0.383  
Char. 268: 0.721-0.745 --> 0.755  
Char. 269: 0.480-0.610 --> 0.879  
Char. 274: 0.452-0.716 --> 0.731  
Char. 279: 0.631-0.671 --> 0.727  
Char. 282: 0.231-0.292 --> 0.126

Char. 283: 0.459-0.523 --> 0.416  
Char. 289: 0.120-0.238 --> 0.090  
Char. 290: 0.245-0.326 --> 0.188  
Char. 292: 0.342-0.368 --> 0.268  
Char. 295: 0.222 --> 0.111  
Char. 300: 0.404-0.420 --> 0.310  
Char. 301: 0.658 --> 0.771  
Char. 304: 0.142-0.285 --> 0.000  
Char. 374: 0.226-0.600 --> 0.708  
Char. 375: 0.462-0.669 --> 0.920  
Char. 377: 0.288-0.333 --> 0.506  
Char. 378: 0.815 --> 1.000  
Char. 382: 0.624-0.639 --> 0.521  
Char. 383: 0.557-0.783 --> 0.884  
Char. 395: 0.560-0.568 --> 0.448  
Char. 399: 0.361-0.416 --> 0.618  
Char. 539: 1 --> 0  
Char. 548: 1 --> 2  
Char. 549: 0 --> 2  
Char. 553: 2 --> 1  
Char. 571: 2 --> 1  
Char. 615: 1 --> 2

Spy\_I\_II :

Char. 2: 0.324 --> 0.357  
Char. 3: 0.323 --> 0.422  
Char. 4: 0.418-0.443 --> 0.338  
Char. 5: 0.343 --> 0.339  
Char. 6: 0.410-0.415 --> 0.371  
Char. 22: 0.588-0.604 --> 0.611  
Char. 23: 0.774-0.810 --> 0.833  
Char. 32: 0.316-0.384 --> 0.237  
Char. 33: 0.397 --> 0.292  
Char. 35: 0.554 --> 0.625  
Char. 39: 0.371-0.431 --> 0.355  
Char. 40: 0.456-0.472 --> 0.419  
Char. 41: 0.279-0.282 --> 0.254  
Char. 42: 0.425-0.481 --> 0.322  
Char. 44: 0.407 --> 0.365  
Char. 45: 0.614-0.638 --> 0.647  
Char. 46: 0.551 --> 0.599  
Char. 51: 0.660-0.680 --> 0.923

Char. 52: 0.406-0.417 --> 0.252  
Char. 58: 0.563 --> 0.439  
Char. 59: 0.536-0.552 --> 0.484  
Char. 61: 0.652 --> 0.668  
Char. 63: 0.692-0.705 --> 0.668  
Char. 66: 0.338-0.449 --> 0.590  
Char. 67: 0.226 --> 0.281  
Char. 68: 0.256-0.315 --> 0.392  
Char. 69: 0.224-0.285 --> 0.379  
Char. 71: 0.548-0.561 --> 0.365  
Char. 73: 0.255-0.355 --> 0.018  
Char. 74: 0.477-0.482 --> 0.254  
Char. 75: 0.268 --> 0.181  
Char. 76: 0.382 --> 0.720  
Char. 77: 0.185-0.224 --> 0.147  
Char. 81: 0.284 --> 0.332  
Char. 85: 0.217-0.297 --> 0.373  
Char. 86: 0.302-0.360 --> 0.459  
Char. 87: 0.728 --> 0.743  
Char. 89: 0.249-0.308 --> 0.371  
Char. 91: 0.394-0.409 --> 0.369  
Char. 93: 0.311 --> 0.411  
Char. 98: 0.490-0.544 --> 0.386  
Char. 137: 0.389-0.395 --> 0.385  
Char. 236: 0.049-0.107 --> 0.112  
Char. 238: 0.242 --> 0.223  
Char. 245: 0.114 --> 0.241  
Char. 246: 0.170-0.177 --> 0.296  
Char. 247: 0.352-0.419 --> 0.333  
Char. 248: 0.493 --> 0.568  
Char. 320: 0.423 --> 0.388  
Char. 323: 0.515-0.666 --> 0.426  
Char. 331: 0.483 --> 0.379  
Char. 334: 0.198-0.199 --> 0.175  
Char. 336: 0.304 --> 0.359  
Char. 337: 0.241-0.261 --> 0.162  
Char. 338: 0.388 --> 0.509  
Char. 340: 0.413 --> 0.387  
Char. 341: 0.216 --> 0.262  
Char. 342: 0.499 --> 0.961  
Char. 343: 0.524-0.538 --> 0.761

Char. 345: 0.408-0.504 --> 0.600  
Char. 369: 0.431 --> 0.427  
Char. 473: 2 --> 1  
Char. 497: 2 --> 0  
Char. 525: 1 --> 0

Gibraltar\_1 :

Char. 0: 0.572 --> 0.526  
Char. 1: 0.196-0.272 --> 0.318  
Char. 2: 0.145-0.278 --> 0.367  
Char. 3: 0.254-0.257 --> 0.382  
Char. 4: 0.418-0.455 --> 0.645  
Char. 6: 0.233 --> 0.142  
Char. 7: 0.060-0.087 --> 0.000  
Char. 8: 0.119-0.191 --> 0.000  
Char. 9: 0.117 --> 0.380  
Char. 10: 0.187 --> 0.410  
Char. 15: 0.332 --> 0.368  
Char. 16: 0.436 --> 0.470  
Char. 18: 0.433 --> 0.508  
Char. 19: 0.629-0.651 --> 0.802  
Char. 20: 0.725-0.744 --> 0.804  
Char. 22: 0.765-0.784 --> 0.839  
Char. 23: 0.939 --> 1.000  
Char. 24: 0.197 --> 0.131  
Char. 26: 0.467 --> 0.566  
Char. 30: 0.046 --> 0.000  
Char. 31: 0.259 --> 0.325  
Char. 32: 0.258-0.292 --> 0.185  
Char. 35: 0.378-0.554 --> 0.688  
Char. 36: 0.407-0.614 --> 0.829  
Char. 40: 0.567 --> 0.594  
Char. 42: 0.479-0.554 --> 0.572  
Char. 44: 0.462-0.465 --> 0.525  
Char. 47: 0.590 --> 0.707  
Char. 49: 0.430 --> 0.777  
Char. 50: 0.632-0.667 --> 0.605  
Char. 52: 0.417 --> 0.640  
Char. 53: 0.335-0.446 --> 0.559  
Char. 58: 0.590 --> 0.740  
Char. 59: 0.612 --> 0.732  
Char. 62: 0.427 --> 0.461

Char. 64: 0.140-0.149 --> 0.282  
Char. 65: 0.076-0.131 --> 0.318  
Char. 72: 0.126 --> 0.275  
Char. 74: 0.477-0.482 --> 0.359  
Char. 79: 0.227 --> 0.163  
Char. 82: 0.405-0.506 --> 0.573  
Char. 85: 0.297 --> 0.358  
Char. 86: 0.360 --> 0.431  
Char. 87: 0.440-0.587 --> 0.692  
Char. 88: 0.592-0.703 --> 0.820  
Char. 89: 0.308 --> 0.377  
Char. 91: 0.419 --> 0.452  
Char. 92: 0.358 --> 0.463  
Char. 93: 0.260-0.311 --> 0.343  
Char. 94: 0.177 --> 0.142  
Char. 100: 0.200 --> 0.387  
Char. 101: 0.709-0.713 --> 0.745  
Char. 103: 0.203-0.223 --> 0.125  
Char. 110: 0.508 --> 0.983  
Char. 112: 0.268-0.511 --> 0.208  
Char. 115: 0.212-0.228 --> 0.387  
Char. 116: 0.246-0.284 --> 0.308  
Char. 126: 0.414 --> 0.206  
Char. 128: 0.371 --> 0.275  
Char. 129: 0.211-0.221 --> 0.198  
Char. 130: 0.630 --> 0.671  
Char. 138: 0.212-0.295 --> 0.087  
Char. 320: 0.423 --> 0.411  
Char. 322: 0.922 --> 0.943  
Char. 323: 0.038 --> 0.022  
Char. 324: 0.675 --> 0.836  
Char. 330: 0.283-0.338 --> 0.000  
Char. 331: 0.394-0.613 --> 0.281  
Char. 332: 0.422-0.548 --> 0.626  
Char. 333: 0.462 --> 0.952  
Char. 335: 0.120-0.226 --> 0.104  
Char. 337: 0.261 --> 0.396  
Char. 341: 0.162 --> 0.063  
Char. 348: 0.266-0.303 --> 0.358  
Char. 351: 0.527 --> 0.508  
Char. 352: 0.329 --> 0.118

Char. 355: 0.389 --> 0.367  
Char. 358: 0.378-0.692 --> 0.350  
Char. 359: 0.634 --> 0.542  
Char. 363: 0.724-0.879 --> 0.896  
Char. 456: 0 --> 1  
Char. 465: 0 --> 1  
Char. 469: 0 --> 1  
Char. 503: 0 --> 1  
Char. 521: 1 --> 0  
Char. 605: 2 --> 3  
Char. 608: 1 --> 0

Amud :

Char. 0: 0.681-0.745 --> 0.947  
Char. 3: 0.254-0.257 --> 0.202  
Char. 18: 0.429 --> 0.280  
Char. 22: 0.588-0.604 --> 0.554  
Char. 26: 0.432-0.447 --> 0.461  
Char. 40: 0.456-0.472 --> 0.394  
Char. 41: 0.279-0.282 --> 0.192  
Char. 45: 0.614 --> 0.604  
Char. 47: 0.590 --> 0.592  
Char. 49: 0.418-0.430 --> 0.406  
Char. 52: 0.406-0.417 --> 0.540  
Char. 53: 0.457 --> 0.466  
Char. 58: 0.563-0.570 --> 0.594  
Char. 59: 0.536-0.552 --> 0.596  
Char. 62: 0.455 --> 0.492  
Char. 68: 0.256-0.315 --> 0.217  
Char. 69: 0.224-0.285 --> 0.192  
Char. 79: 0.180 --> 0.123  
Char. 85: 0.217-0.297 --> 0.193  
Char. 86: 0.302-0.360 --> 0.298  
Char. 87: 0.587 --> 0.683  
Char. 88: 0.703 --> 0.878  
Char. 106: 0.447 --> 0.584  
Char. 107: 0.427 --> 0.617  
Char. 112: 0.476-0.511 --> 0.535  
Char. 126: 0.414 --> 0.175  
Char. 333: 0.389-0.462 --> 0.351  
Char. 337: 0.241-0.261 --> 0.351  
Char. 345: 0.408-0.504 --> 0.393



Char. 355: 0.389 --> 0.600  
 Char. 465: 0 --> 1  
 La\_Chapelle\_aux\_Saints :  
 Char. 2: 0.145-0.278 --> 0.111  
 Char. 3: 0.254-0.257 --> 0.250  
 Char. 9: 0.064-0.117 --> 0.000  
 Char. 10: 0.044-0.187 --> 0.000  
 Char. 11: 0.308-0.490 --> 0.233  
 Char. 13: 0.343 --> 0.223  
 Char. 16: 0.249-0.408 --> 0.172  
 Char. 18: 0.429-0.433 --> 0.400  
 Char. 20: 0.725-0.744 --> 0.697  
 Char. 21: 0.825-0.879 --> 0.916  
 Char. 26: 0.432-0.447 --> 0.294  
 Char. 27: 0.332-0.340 --> 0.178  
 Char. 29: 0.522-0.556 --> 0.311  
 Char. 33: 0.294-0.374 --> 0.191  
 Char. 35: 0.378-0.554 --> 0.279  
 Char. 36: 0.407-0.614 --> 0.189  
 Char. 40: 0.456-0.472 --> 0.270  
 Char. 41: 0.279-0.282 --> 0.075  
 Char. 43: 0.597-0.622 --> 0.670  
 Char. 45: 0.629-0.638 --> 0.647  
 Char. 46: 0.361-0.445 --> 0.308  
 Char. 48: 0.497-0.517 --> 0.540  
 Char. 49: 0.418-0.430 --> 0.300  
 Char. 51: 0.660 --> 0.074  
 Char. 52: 0.406-0.417 --> 0.231  
 Char. 54: 0.298-0.424 --> 0.000  
 Char. 55: 0.501-0.551 --> 0.583  
 Char. 56: 0.418-0.507 --> 0.145  
 Char. 57: 0.423-0.449 --> 0.625  
 Char. 59: 0.536-0.552 --> 0.488  
 Char. 60: 0.412-0.423 --> 0.362  
 Char. 64: 0.140-0.149 --> 0.000  
 Char. 68: 0.256-0.315 --> 0.396  
 Char. 69: 0.236-0.285 --> 0.449  
 Char. 70: 0.219-0.232 --> 0.239  
 Char. 75: 0.306-0.327 --> 0.256  
 Char. 76: 0.350-0.382 --> 0.469  
 Char. 77: 0.180-0.224 --> 0.118  
 Char. 78: 0.340 --> 0.133  
 Char. 80: 0.298-0.725 --> 0.290  
 Char. 81: 0.284 --> 0.109  
 Char. 85: 0.217-0.297 --> 0.161  
 Char. 86: 0.302-0.360 --> 0.238  
 Char. 89: 0.249-0.308 --> 0.073  
 Char. 90: 0.231-0.241 --> 0.108  
 Char. 91: 0.394-0.409 --> 0.368  
 Char. 92: 0.303-0.358 --> 0.290  
 Char. 95: 0.214-0.215 --> 0.168  
 Char. 96: 0.322-0.347 --> 0.205  
 Char. 97: 0.479 --> 0.469  
 Char. 98: 0.581-0.695 --> 0.923  
 Char. 99: 0.402-0.433 --> 0.267  
 Char. 100: 0.192 --> 0.119  
 Char. 101: 0.709-0.713 --> 0.566  
 Char. 102: 0.646-0.684 --> 0.710  
 Char. 104: 0.747-0.827 --> 0.853  
 Char. 107: 0.280-0.339 --> 0.229  
 Char. 109: 0.247-0.279 --> 0.244  
 Char. 113: 0.558-0.601 --> 0.501  
 Char. 114: 0.332-0.373 --> 0.209  
 Char. 117: 0.715-0.723 --> 0.707  
 Char. 122: 0.556-0.744 --> 0.478  
 Char. 124: 0.109-0.197 --> 0.006  
 Char. 127: 0.469-0.484 --> 0.346  
 Char. 129: 0.211-0.221 --> 0.330  
 Char. 130: 0.620-0.630 --> 0.458  
 Char. 131: 0.231 --> 0.220  
 Char. 134: 0.102-0.272 --> 0.015  
 Char. 135: 0.449 --> 0.271  
 Char. 136: 0.330 --> 0.362  
 Char. 137: 0.389-0.395 --> 0.365  
 Char. 138: 0.212-0.295 --> 0.318  
 Char. 139: 0.172-0.187 --> 0.399  
 Char. 140: 0.343 --> 0.009  
 Char. 141: 0.119 --> 0.793  
 Char. 142: 0.055 --> 0.016  
 Char. 143: 0.449-0.455 --> 0.522  
 Char. 146: 0.349 --> 0.000  
 Char. 147: 0.389 --> 0.484

Char. 148: 0.498-0.531 --> 0.426  
Char. 149: 0.458 --> 0.364  
Char. 150: 0.513 --> 0.150  
Char. 152: 0.396 --> 0.674  
Char. 153: 0.436 --> 0.532  
Char. 154: 0.315 --> 0.636  
Char. 155: 0.584 --> 0.591  
Char. 156: 0.199 --> 0.717  
Char. 164: 0.518 --> 0.554  
Char. 165: 0.638 --> 0.368  
Char. 189: 0.013 --> 0.000  
Char. 321: 0.663-0.717 --> 0.622  
Char. 322: 0.845-0.888 --> 0.779  
Char. 324: 0.598-0.675 --> 0.572  
Char. 325: 0.286-0.353 --> 0.159  
Char. 326: 0.180-0.311 --> 0.000  
Char. 328: 0.383 --> 0.262  
Char. 329: 0.473 --> 0.323  
Char. 332: 0.422-0.548 --> 0.328  
Char. 333: 0.389-0.462 --> 0.138  
Char. 336: 0.279 --> 0.078  
Char. 337: 0.241-0.261 --> 0.149  
Char. 338: 0.249-0.335 --> 0.225  
Char. 341: 0.162-0.166 --> 0.332  
Char. 342: 0.559 --> 0.784  
Char. 344: 0.325 --> 0.387  
Char. 346: 0.262-0.267 --> 0.138  
Char. 348: 0.266-0.303 --> 0.234  
Char. 349: 0.393-0.411 --> 0.567  
Char. 350: 0.489-0.547 --> 0.351  
Char. 360: 0.441-0.463 --> 0.320  
Char. 361: 0.339-0.373 --> 0.400  
Char. 365: 0.504 --> 0.439  
Char. 367: 0.570-0.660 --> 0.696  
Char. 368: 0.635 --> 0.473  
Char. 370: 0.447-0.545 --> 0.409  
Char. 371: 0.191-0.197 --> 0.434  
Char. 372: 0.201-0.215 --> 0.506  
Char. 374: 0.368-0.483 --> 0.893  
Char. 376: 0.389-0.639 --> 0.000  
Char. 377: 0.390 --> 1.000

Char. 383: 0.763 --> 1.000  
Char. 399: 0.259 --> 0.150  
Char. 419: 1 --> 2  
Char. 471: 3 --> 2  
Char. 473: 2 --> 3  
Char. 474: 0 --> 1  
Char. 491: 3 --> 0  
Char. 495: 1 --> 0  
Char. 496: 1 --> 0  
Char. 497: 2 --> 1  
Char. 499: 1 --> 0  
Char. 516: 2 --> 1  
Char. 537: 1 --> 0  
Char. 538: 2 --> 0  
Char. 555: 1 --> 0  
Char. 571: 2 --> 1  
Char. 577: 0 --> 1  
Char. 578: 1 --> 0  
Char. 580: 1 --> 0  
Char. 583: 2 --> 1  
Char. 584: 1 --> 0

La\_Ferrassie\_1 :

Char. 0: 0.681-0.745 --> 0.865  
Char. 1: 0.290 --> 0.308  
Char. 4: 0.418-0.443 --> 0.584  
Char. 5: 0.343 --> 0.466  
Char. 6: 0.410-0.415 --> 0.492  
Char. 7: 0.374 --> 0.411  
Char. 8: 0.465 --> 0.501  
Char. 9: 0.287 --> 0.451  
Char. 10: 0.303 --> 0.491  
Char. 15: 0.332 --> 0.382  
Char. 17: 0.371-0.419 --> 0.425  
Char. 18: 0.458-0.474 --> 0.527  
Char. 19: 0.512 --> 0.500  
Char. 20: 0.725-0.744 --> 0.714  
Char. 22: 0.588-0.604 --> 0.508  
Char. 23: 0.774-0.810 --> 0.712  
Char. 24: 0.300 --> 0.333  
Char. 25: 0.279 --> 0.313  
Char. 26: 0.432 --> 0.325

Char. 30: 0.110-0.117 --> 0.099  
Char. 31: 0.257-0.259 --> 0.287  
Char. 34: 0.360 --> 0.372  
Char. 37: 0.297-0.311 --> 0.359  
Char. 39: 0.371-0.431 --> 0.531  
Char. 40: 0.456-0.472 --> 0.495  
Char. 42: 0.425-0.481 --> 0.499  
Char. 45: 0.614-0.638 --> 0.588  
Char. 47: 0.487 --> 0.441  
Char. 48: 0.476 --> 0.120  
Char. 49: 0.608 --> 0.614  
Char. 50: 0.632 --> 0.573  
Char. 51: 0.660-0.680 --> 0.659  
Char. 52: 0.406-0.417 --> 0.479  
Char. 53: 0.446 --> 0.486  
Char. 63: 0.692-0.705 --> 0.789  
Char. 64: 0.208 --> 0.297  
Char. 65: 0.237-0.318 --> 0.348  
Char. 66: 0.338-0.449 --> 0.334  
Char. 69: 0.224-0.285 --> 0.212  
Char. 70: 0.219-0.230 --> 0.287  
Char. 71: 0.548-0.561 --> 0.769  
Char. 72: 0.245 --> 0.249  
Char. 73: 0.255-0.355 --> 0.483  
Char. 74: 0.477-0.482 --> 0.623  
Char. 77: 0.185-0.224 --> 0.257  
Char. 78: 0.340-0.346 --> 0.315  
Char. 79: 0.419 --> 0.568  
Char. 80: 0.616 --> 0.531  
Char. 81: 0.284 --> 0.232  
Char. 82: 0.496-0.506 --> 0.576  
Char. 88: 0.870 --> 0.931  
Char. 89: 0.249-0.308 --> 0.234  
Char. 91: 0.394-0.409 --> 0.474  
Char. 92: 0.303 --> 0.262  
Char. 94: 0.196 --> 0.259  
Char. 112: 0.511 --> 0.562  
Char. 126: 0.195 --> 0.116  
Char. 138: 0.212-0.236 --> 0.000  
Char. 226: 0.312-0.389 --> 0.257  
Char. 227: 0.033-0.100 --> 0.000

Char. 228: 0.459 --> 0.733  
Char. 235: 0.101-0.132 --> 0.083  
Char. 237: 0.742 --> 0.727  
Char. 238: 0.242 --> 0.438  
Char. 249: 0.200-0.500 --> 0.000  
Char. 320: 0.423 --> 0.437  
Char. 322: 0.888-0.896 --> 0.823  
Char. 324: 0.598-0.626 --> 0.449  
Char. 330: 0.296 --> 0.230  
Char. 332: 0.536 --> 0.483  
Char. 333: 0.389-0.462 --> 0.528  
Char. 334: 0.198-0.199 --> 0.266  
Char. 335: 0.352 --> 0.370  
Char. 337: 0.241-0.261 --> 0.323  
Char. 339: 0.581-0.599 --> 0.605  
Char. 343: 0.524-0.538 --> 0.495  
Char. 345: 0.408-0.504 --> 0.397  
Char. 347: 0.134-0.193 --> 0.094  
Char. 348: 0.252 --> 0.095  
Char. 370: 0.392 --> 0.360  
Char. 403: 0 --> 2  
Char. 414: 2 --> 1  
Char. 471: 3 --> 2  
Char. 495: 1 --> 0  
Char. 496: 1 --> 0

Shanidar\_1\_5 :

Char. 0: 0.681-0.745 --> 0.831  
Char. 1: 0.185 --> 0.161  
Char. 2: 0.259-0.278 --> 0.233  
Char. 3: 0.254-0.257 --> 0.196  
Char. 4: 0.418-0.443 --> 0.395  
Char. 6: 0.410-0.415 --> 0.439  
Char. 7: 0.147-0.177 --> 0.081  
Char. 8: 0.164-0.232 --> 0.111  
Char. 12: 0.325 --> 0.323  
Char. 13: 0.343 --> 0.236  
Char. 18: 0.474 --> 0.480  
Char. 19: 0.564-0.629 --> 0.464  
Char. 20: 0.725-0.744 --> 0.657  
Char. 22: 0.588-0.604 --> 0.515  
Char. 28: 0.301-0.351 --> 0.100

Char. 30: 0.110-0.117 --> 0.049  
Char. 31: 0.212 --> 0.120  
Char. 33: 0.397-0.437 --> 0.467  
Char. 36: 0.578-0.614 --> 0.631  
Char. 41: 0.279-0.282 --> 0.262  
Char. 42: 0.425-0.481 --> 0.393  
Char. 44: 0.432-0.462 --> 0.469  
Char. 45: 0.614-0.638 --> 0.648  
Char. 47: 0.595 --> 0.635  
Char. 48: 0.476-0.489 --> 0.346  
Char. 49: 0.418-0.430 --> 0.342  
Char. 50: 0.632-0.659 --> 0.701  
Char. 54: 0.424 --> 0.450  
Char. 55: 0.364-0.401 --> 0.355  
Char. 57: 0.423 --> 0.346  
Char. 58: 0.563-0.570 --> 0.598  
Char. 59: 0.536-0.552 --> 0.676  
Char. 60: 0.544-0.697 --> 0.861  
Char. 62: 0.287-0.424 --> 0.065  
Char. 63: 0.692-0.705 --> 0.709  
Char. 66: 0.338-0.447 --> 0.305  
Char. 71: 0.548-0.561 --> 0.700  
Char. 73: 0.355 --> 0.448  
Char. 74: 0.477-0.482 --> 0.613  
Char. 76: 0.350-0.382 --> 0.223  
Char. 78: 0.340-0.346 --> 0.226  
Char. 79: 0.227-0.419 --> 0.142  
Char. 82: 0.496-0.506 --> 0.672  
Char. 84: 0.237-0.244 --> 0.130  
Char. 85: 0.217-0.297 --> 0.135  
Char. 86: 0.302-0.360 --> 0.290  
Char. 87: 0.527-0.587 --> 0.468  
Char. 89: 0.249-0.308 --> 0.148  
Char. 90: 0.231-0.241 --> 0.195  
Char. 91: 0.394-0.409 --> 0.389  
Char. 92: 0.303-0.358 --> 0.264  
Char. 93: 0.298-0.311 --> 0.263  
Char. 95: 0.214-0.215 --> 0.186  
Char. 96: 0.322-0.347 --> 0.264  
Char. 97: 0.506-0.594 --> 0.608  
Char. 98: 0.581-0.695 --> 0.755

Char. 100: 0.230 --> 0.293  
Char. 104: 0.618-0.718 --> 0.610  
Char. 107: 0.280-0.339 --> 0.223  
Char. 109: 0.247-0.279 --> 0.225  
Char. 112: 0.476-0.511 --> 0.388  
Char. 113: 0.656-0.679 --> 0.582  
Char. 114: 0.332-0.373 --> 0.324  
Char. 118: 0.164 --> 0.154  
Char. 119: 0.292 --> 0.126  
Char. 120: 0.307-0.314 --> 0.164  
Char. 121: 0.124 --> 0.006  
Char. 123: 0.898-0.933 --> 0.964  
Char. 125: 0.206-0.245 --> 0.189  
Char. 128: 0.371-0.389 --> 0.175  
Char. 129: 0.211-0.221 --> 0.135  
Char. 130: 0.620-0.630 --> 0.757  
Char. 137: 0.413-0.455 --> 0.554  
Char. 138: 0.212-0.236 --> 0.180  
Char. 139: 0.162 --> 0.078  
Char. 140: 0.343-0.405 --> 0.453  
Char. 142: 0.414-0.419 --> 0.484  
Char. 143: 0.449-0.455 --> 0.345  
Char. 148: 0.498-0.531 --> 0.933  
Char. 149: 0.458-0.564 --> 0.568  
Char. 150: 0.550-0.664 --> 0.743  
Char. 151: 0.327-0.345 --> 0.607  
Char. 152: 0.365-0.567 --> 0.733  
Char. 153: 0.412-0.548 --> 0.551  
Char. 155: 0.584 --> 0.645  
Char. 156: 0.199-0.401 --> 0.450  
Char. 163: 0.718-0.826 --> 0.957  
Char. 164: 0.428-0.486 --> 0.928  
Char. 167: 0.396 --> 0.364  
Char. 168: 0.312-0.372 --> 0.507  
Char. 174: 0.340-0.364 --> 0.463  
Char. 177: 0.475-0.480 --> 0.427  
Char. 182: 0.321 --> 0.367  
Char. 183: 0.256-0.257 --> 0.363  
Char. 184: 0.220-0.342 --> 0.365  
Char. 185: 0.276-0.400 --> 0.658  
Char. 189: 0.119-0.240 --> 0.775

Char. 214: 0.037-0.122 --> 0.000  
Char. 215: 0.138-0.174 --> 0.000  
Char. 216: 0.466-0.556 --> 0.583  
Char. 217: 0.270-0.381 --> 0.219  
Char. 220: 0.126-0.170 --> 0.000  
Char. 221: 0.096 --> 0.000  
Char. 223: 0.220-0.228 --> 0.154  
Char. 226: 0.312-0.389 --> 0.295  
Char. 228: 0.367-0.459 --> 0.651  
Char. 235: 0.101-0.132 --> 0.023  
Char. 236: 0.049-0.107 --> 0.010  
Char. 237: 0.749 --> 0.807  
Char. 240: 0.500-0.583 --> 0.666  
Char. 245: 0.102-0.114 --> 0.079  
Char. 247: 0.352-0.419 --> 0.599  
Char. 250: 0.250-0.416 --> 0.500  
Char. 251: 0.000-0.083 --> 0.333  
Char. 261: 0.184-0.213 --> 0.280  
Char. 264: 0.377 --> 0.470  
Char. 266: 0.454-0.478 --> 0.532  
Char. 267: 0.123-0.241 --> 0.263  
Char. 269: 0.620-0.912 --> 0.957  
Char. 273: 0.619-0.623 --> 0.824  
Char. 278: 0.280-0.476 --> 0.481  
Char. 283: 0.716-0.746 --> 1.000  
Char. 291: 0.482-0.629 --> 0.636  
Char. 294: 0.000-0.166 --> 0.333  
Char. 300: 0.538-0.649 --> 0.440  
Char. 307: 0.119 --> 0.000  
Char. 309: 0.725 --> 0.828  
Char. 321: 0.739-0.789 --> 0.712  
Char. 326: 0.211-0.311 --> 0.321  
Char. 328: 0.383-0.423 --> 0.430  
Char. 336: 0.279-0.286 --> 0.261  
Char. 338: 0.363-0.388 --> 0.866  
Char. 339: 0.581-0.599 --> 0.718  
Char. 342: 0.499 --> 0.458  
Char. 344: 0.310-0.325 --> 0.233  
Char. 345: 0.408-0.504 --> 0.293  
Char. 346: 0.310-0.429 --> 0.284  
Char. 348: 0.266-0.303 --> 0.192

Char. 349: 0.393-0.411 --> 0.486  
Char. 351: 0.571-0.662 --> 0.717  
Char. 352: 0.329-0.350 --> 0.372  
Char. 354: 0.481 --> 0.584  
Char. 355: 0.389 --> 0.291  
Char. 357: 0.293-0.397 --> 0.431  
Char. 359: 0.634-0.724 --> 0.727  
Char. 360: 0.441-0.463 --> 0.306  
Char. 364: 0.621-0.662 --> 0.672  
Char. 369: 0.431-0.437 --> 0.411  
Char. 370: 0.447-0.545 --> 0.661  
Char. 371: 0.172 --> 0.085  
Char. 372: 0.188-0.194 --> 0.090  
Char. 374: 0.368-0.483 --> 0.266  
Char. 376: 0.779-0.853 --> 0.855  
Char. 379: 0.834-0.838 --> 0.754  
Char. 380: 0.429-0.527 --> 0.412  
Char. 381: 0.816-0.824 --> 0.841  
Char. 383: 0.763 --> 0.709  
Char. 393: 0.817-0.860 --> 0.890  
Char. 394: 0.376-0.438 --> 0.564  
Char. 395: 0.263-0.330 --> 0.558  
Char. 397: 0.199-0.218 --> 0.450  
Char. 398: 0.143-0.151 --> 0.210  
Char. 399: 0.259-0.416 --> 0.948  
Char. 451: 0 --> 2  
Char. 471: 3 --> 2  
Char. 473: 2 --> 1  
Char. 535: 1 --> 0  
Char. 544: 2 --> 1  
Char. 559: 2 --> 1  
Char. 625: 0 --> 1  
Char. 626: 1 --> 2  
Char. 629: 1 --> 2

Cesaire :

Char. 21: 0.664-0.766 --> 0.587  
Char. 41: 0.279-0.282 --> 0.382  
Char. 43: 0.301-0.451 --> 0.292  
Char. 60: 0.579-0.697 --> 0.936  
Char. 124: 0.063 --> 0.000  
Char. 151: 0.327-0.345 --> 0.288

Char. 154: 0.228 --> 0.168  
Char. 157: 0.507-0.584 --> 0.442  
Char. 158: 0.592-0.594 --> 0.489  
Char. 159: 0.450-0.582 --> 0.407  
Char. 160: 0.612 --> 0.569  
Char. 161: 0.480 --> 0.326  
Char. 162: 0.931 --> 0.868  
Char. 164: 0.300 --> 0.129  
Char. 165: 0.704-0.726 --> 0.817  
Char. 166: 0.923 --> 0.931  
Char. 169: 0.218 --> 0.202  
Char. 170: 0.160 --> 0.073  
Char. 171: 0.242 --> 0.112  
Char. 172: 0.310 --> 0.262  
Char. 173: 0.703 --> 0.628  
Char. 174: 0.308 --> 0.268  
Char. 175: 0.667 --> 0.549  
Char. 176: 0.569 --> 0.553  
Char. 177: 0.475-0.480 --> 0.289  
Char. 178: 0.508-0.673 --> 0.461  
Char. 179: 0.762-0.798 --> 0.615  
Char. 182: 0.172 --> 0.098  
Char. 183: 0.124-0.125 --> 0.110  
Char. 184: 0.145 --> 0.022  
Char. 185: 0.276 --> 0.218  
Char. 187: 0.425-0.432 --> 0.403  
Char. 189: 0.119 --> 0.066  
Char. 216: 0.437-0.556 --> 0.254  
Char. 217: 0.310-0.381 --> 0.453  
Char. 222: 0.366 --> 0.348  
Char. 223: 0.308 --> 0.321  
Char. 228: 0.367-0.459 --> 0.300  
Char. 230: 0.714 --> 1.000  
Char. 232: 0.000 --> 0.307  
Char. 237: 0.742-0.749 --> 0.829  
Char. 239: 0.200 --> 0.600  
Char. 241: 0.200 --> 0.100  
Char. 242: 0.000 --> 0.333  
Char. 247: 0.352-0.419 --> 0.544  
Char. 250: 0.416 --> 0.500  
Char. 251: 0.000-0.083 --> 0.250

Char. 252: 0.000 --> 0.800  
Char. 261: 0.171 --> 0.106  
Char. 266: 0.454 --> 0.356  
Char. 267: 0.064 --> 0.063  
Char. 268: 0.451-0.520 --> 0.638  
Char. 271: 0.064 --> 0.095  
Char. 273: 0.619 --> 0.563  
Char. 274: 0.661-0.716 --> 0.801  
Char. 277: 0.015 --> 0.000  
Char. 281: 0.058-0.061 --> 0.057  
Char. 282: 0.116-0.172 --> 0.036  
Char. 283: 0.716 --> 0.596  
Char. 284: 0.375 --> 0.500  
Char. 290: 0.165-0.201 --> 0.000  
Char. 291: 0.416-0.458 --> 0.055  
Char. 292: 0.371-0.491 --> 0.208  
Char. 294: 0.000-0.166 --> 0.333  
Char. 299: 0.146-0.178 --> 0.140  
Char. 301: 0.773-0.787 --> 0.832  
Char. 321: 0.765-0.789 --> 0.818  
Char. 322: 0.888-0.896 --> 0.958  
Char. 323: 0.515-0.666 --> 0.848  
Char. 332: 0.536-0.548 --> 0.690  
Char. 333: 0.389-0.462 --> 0.312  
Char. 340: 0.413-0.513 --> 0.664  
Char. 341: 0.162-0.166 --> 0.158  
Char. 346: 0.364-0.429 --> 0.471  
Char. 347: 0.134-0.193 --> 0.267  
Char. 348: 0.266-0.303 --> 0.469  
Char. 349: 0.411 --> 0.449  
Char. 351: 0.571-0.662 --> 0.731  
Char. 352: 0.329-0.350 --> 0.257  
Char. 354: 0.307-0.481 --> 0.257  
Char. 355: 0.389 --> 0.468  
Char. 356: 0.585-0.663 --> 0.537  
Char. 357: 0.254 --> 0.006  
Char. 361: 0.315-0.328 --> 0.300  
Char. 362: 0.552-0.757 --> 0.426  
Char. 363: 0.724-0.743 --> 0.339  
Char. 364: 0.621 --> 0.399  
Char. 367: 0.570-0.660 --> 0.562

Char. 368: 0.792 --> 1.000  
Char. 370: 0.447-0.545 --> 0.569  
Char. 378: 0.608 --> 0.507  
Char. 379: 0.834 --> 0.761  
Char. 382: 0.370 --> 0.342  
Char. 383: 0.763 --> 0.688  
Char. 385: 0.788 --> 0.830  
Char. 387: 0.551-0.559 --> 0.540  
Char. 394: 0.376-0.438 --> 0.237  
Char. 396: 0.395-0.481 --> 0.051  
Char. 397: 0.199 --> 0.179  
Char. 398: 0.151 --> 0.181  
Char. 404: 0 --> 2  
Char. 419: 1 --> 2  
Char. 446: 0 --> 1  
Char. 544: 2 --> 0  
Char. 545: 1 --> 0  
Char. 546: 1 --> 0  
Char. 563: 1 --> 2  
Char. 580: 1 --> 2  
Char. 589: 0 --> 1  
Char. 599: 0 --> 1  
Char. 608: 1 --> 0  
Char. 615: 1 --> 2

Saccopastore\_I\_II :

Char. 4: 0.418-0.443 --> 0.493  
Char. 5: 0.343 --> 0.289  
Char. 11: 0.308-0.391 --> 0.282  
Char. 17: 0.371-0.419 --> 0.286  
Char. 19: 0.564-0.708 --> 0.712  
Char. 22: 0.588-0.604 --> 0.692  
Char. 24: 0.257 --> 0.254  
Char. 26: 0.432-0.447 --> 0.342  
Char. 27: 0.340-0.388 --> 0.449  
Char. 28: 0.301-0.515 --> 0.686  
Char. 29: 0.496-0.522 --> 0.274  
Char. 33: 0.397-0.437 --> 0.230  
Char. 34: 0.353 --> 0.246  
Char. 37: 0.297-0.311 --> 0.286  
Char. 38: 0.411 --> 0.006  
Char. 39: 0.414-0.431 --> 0.511

Char. 40: 0.468-0.472 --> 0.533  
Char. 41: 0.279-0.282 --> 0.346  
Char. 42: 0.425-0.481 --> 0.561  
Char. 43: 0.368-0.506 --> 0.524  
Char. 45: 0.593-0.636 --> 0.579  
Char. 50: 0.632-0.659 --> 0.608  
Char. 51: 0.660-0.680 --> 0.649  
Char. 53: 0.419-0.433 --> 0.406  
Char. 58: 0.539-0.570 --> 0.511  
Char. 60: 0.544-0.697 --> 0.511  
Char. 61: 0.637 --> 0.698  
Char. 62: 0.287-0.424 --> 0.523  
Char. 64: 0.154 --> 0.063  
Char. 67: 0.198-0.209 --> 0.196  
Char. 68: 0.117-0.183 --> 0.094  
Char. 74: 0.477-0.482 --> 0.340  
Char. 76: 0.376-0.420 --> 0.721  
Char. 78: 0.451 --> 0.537  
Char. 80: 0.616-0.725 --> 0.383  
Char. 81: 0.284 --> 0.256  
Char. 82: 0.450-0.506 --> 0.448  
Char. 85: 0.462-0.603 --> 0.625  
Char. 86: 0.385-0.462 --> 0.614  
Char. 87: 0.527-0.587 --> 0.837  
Char. 88: 0.611-0.703 --> 0.899  
Char. 89: 0.460-0.619 --> 0.786  
Char. 90: 0.514-0.627 --> 0.643  
Char. 91: 0.398-0.409 --> 0.449  
Char. 96: 0.370 --> 0.385  
Char. 97: 0.209 --> 0.074  
Char. 99: 0.535-0.555 --> 0.608  
Char. 101: 0.635-0.713 --> 0.747  
Char. 102: 0.554-0.582 --> 0.904  
Char. 104: 0.618-0.718 --> 0.920  
Char. 109: 0.321-0.400 --> 0.401  
Char. 110: 0.565 --> 0.751  
Char. 113: 0.656-0.679 --> 0.805  
Char. 124: 0.109-0.185 --> 0.104  
Char. 126: 0.414 --> 0.181  
Char. 132: 0.588-0.682 --> 0.792  
Char. 135: 0.442-0.529 --> 0.648

Char. 191: 0.631 --> 1.000  
 Char. 209: 0.327 --> 0.008  
 Char. 222: 0.563-0.617 --> 0.712  
 Char. 229: 0.333-0.444 --> 0.500  
 Char. 241: 0.500 --> 0.800  
 Char. 249: 0.200 --> 0.150  
 Char. 322: 0.888 --> 0.828  
 Char. 323: 0.366-0.498 --> 0.304  
 Char. 325: 0.286-0.376 --> 0.454  
 Char. 326: 0.211-0.311 --> 0.156  
 Char. 327: 0.537-0.562 --> 0.889  
 Char. 328: 0.317-0.336 --> 0.203  
 Char. 329: 0.431-0.542 --> 0.295  
 Char. 333: 0.593-0.645 --> 1.000  
 Char. 334: 0.199 --> 0.265  
 Char. 335: 0.189 --> 0.185  
 Char. 336: 0.286 --> 0.307  
 Char. 338: 0.363-0.388 --> 0.276  
 Char. 340: 0.583 --> 0.775  
 Char. 342: 0.499 --> 0.955  
 Char. 343: 0.524-0.600 --> 1.000  
 Char. 349: 0.259-0.383 --> 0.042  
 Char. 351: 0.514 --> 0.477  
 Char. 352: 0.329-0.350 --> 0.278  
 Char. 353: 0.500-0.569 --> 1.000  
 Char. 356: 0.585-0.663 --> 0.670  
 Char. 359: 0.417-0.508 --> 0.213  
 Char. 367: 0.766-0.797 --> 0.933  
 Char. 419: 1 --> 2  
 Char. 473: 2 --> 3  
 Char. 474: 0 --> 2  
 Char. 497: 2 --> 1  
 Char. 603: 0 --> 1  
 Neanderthalensis\_type :  
 Char. 0: 0.681-0.745 --> 0.624  
 Char. 1: 0.272 --> 0.376  
 Char. 2: 0.278 --> 0.401  
 Char. 3: 0.254-0.257 --> 0.491  
 Char. 5: 0.366 --> 0.538  
 Char. 6: 0.415 --> 0.510  
 Char. 16: 0.249 --> 0.067  
 Char. 20: 0.757 --> 0.782  
 Char. 23: 0.756 --> 0.749  
 Char. 26: 0.432-0.447 --> 0.000  
 Char. 39: 0.371-0.431 --> 0.581  
 Char. 40: 0.456-0.472 --> 0.522  
 Char. 41: 0.279-0.282 --> 0.298  
 Char. 44: 0.432-0.462 --> 0.300  
 Char. 46: 0.546 --> 0.872  
 Char. 47: 0.590 --> 0.066  
 Char. 48: 0.476-0.498 --> 0.000  
 Char. 49: 0.418-0.430 --> 0.569  
 Char. 50: 0.600 --> 0.573  
 Char. 52: 0.406-0.417 --> 0.259  
 Char. 58: 0.563-0.570 --> 0.409  
 Char. 59: 0.536-0.552 --> 0.416  
 Char. 68: 0.256-0.315 --> 0.527  
 Char. 69: 0.224-0.285 --> 0.473  
 Char. 82: 0.506 --> 0.685  
 Char. 85: 0.217-0.297 --> 0.345  
 Char. 86: 0.302-0.360 --> 0.409  
 Char. 89: 0.249-0.308 --> 0.343  
 Char. 91: 0.394-0.409 --> 0.424  
 Char. 92: 0.362 --> 0.404  
 Char. 93: 0.298-0.311 --> 0.324  
 Char. 126: 0.414 --> 0.445  
 Char. 321: 0.816 --> 0.817  
 Char. 322: 0.845 --> 0.810  
 Char. 323: 0.515-0.532 --> 0.634  
 Char. 333: 0.389-0.462 --> 0.468  
 Char. 334: 0.205 --> 0.265  
 Char. 335: 0.239 --> 1.000  
 Char. 337: 0.241-0.261 --> 0.181  
 Char. 338: 0.317-0.388 --> 0.395  
 Char. 347: 0.134 --> 0.125  
 Char. 348: 0.303 --> 0.320  
 Char. 355: 0.389 --> 0.387  
 Char. 414: 2 --> 0  
 Char. 417: 0 --> 1  
 Char. 418: 1 --> 2  
 Char. 421: 0 --> 1  
 Char. 460: 0 --> 1



Char. 463: 2 --> 1  
Char. 464: 2 --> 1  
Char. 467: 1 --> 0  
Char. 480: 1 --> 0  
Char. 481: 1 --> 0

Xiahe :

Char. 151: 0.327 --> 0.101  
Char. 165: 0.704-0.807 --> 0.658  
Char. 168: 0.629 --> 0.729  
Char. 169: 0.610 --> 0.867  
Char. 175: 0.918 --> 0.961  
Char. 179: 0.578-0.729 --> 0.566  
Char. 180: 0.204-0.296 --> 0.582  
Char. 181: 0.166 --> 0.547  
Char. 183: 0.220-0.257 --> 0.537  
Char. 184: 0.241-0.342 --> 0.568  
Char. 185: 0.455 --> 0.711  
Char. 186: 0.308 --> 0.442  
Char. 281: 0.323-0.365 --> 0.719  
Char. 282: 0.231-0.292 --> 0.498  
Char. 283: 0.248 --> 0.098  
Char. 284: 0.875 --> 1.000  
Char. 289: 0.212-0.238 --> 0.478  
Char. 290: 0.245-0.326 --> 0.650  
Char. 291: 0.236-0.475 --> 0.601  
Char. 292: 0.388-0.491 --> 0.500  
Char. 293: 0.875 --> 1.000  
Char. 296: 0.800 --> 1.000  
Char. 382: 0.492 --> 0.381  
Char. 387: 0.538 --> 0.000  
Char. 388: 0.502-0.651 --> 0.074  
Char. 389: 0.647 --> 0.477  
Char. 391: 0.482-0.542 --> 0.381  
Char. 395: 0.570 --> 0.628  
Char. 399: 0.361-0.416 --> 0.356  
Char. 526: 1 --> 0  
Char. 527: 1 --> 0  
Char. 528: 1 --> 0  
Char. 534: 0 --> 1  
Char. 548: 1 --> 0  
Char. 563: 1 --> 3

Char. 573: 0 --> 1  
Char. 583: 0 --> 2  
Char. 584: 0 --> 1  
Char. 585: 0 --> 1  
Char. 626: 1 --> 2

Dali :

Char. 0: 0.476 --> 0.453  
Char. 5: 0.520-0.796 --> 0.826  
Char. 15: 0.440-0.638 --> 0.722  
Char. 18: 0.438-0.703 --> 0.959  
Char. 22: 0.720-0.737 --> 0.839  
Char. 42: 0.553-0.666 --> 0.767  
Char. 43: 0.530 --> 0.646  
Char. 45: 0.615 --> 0.789  
Char. 60: 0.478 --> 0.335  
Char. 91: 0.678 --> 0.760  
Char. 96: 0.441 --> 0.458  
Char. 99: 0.297-0.380 --> 0.217  
Char. 105: 0.276 --> 0.179  
Char. 111: 0.335-0.503 --> 0.559  
Char. 113: 0.425-0.661 --> 0.423  
Char. 114: 0.512-0.517 --> 0.527  
Char. 332: 0.400-0.417 --> 0.355  
Char. 333: 0.232-0.354 --> 0.185  
Char. 338: 0.282-0.361 --> 0.170  
Char. 351: 0.166-0.197 --> 0.087  
Char. 353: 0.227 --> 0.075  
Char. 354: 0.153-0.230 --> 0.000  
Char. 356: 0.283-0.320 --> 0.191  
Char. 357: 0.393-0.432 --> 0.682  
Char. 605: 3 --> 2

Hualongdong :

Char. 5: 0.520-0.796 --> 0.210  
Char. 22: 0.720-0.737 --> 0.624  
Char. 39: 0.479-0.756 --> 0.232  
Char. 42: 0.553-0.666 --> 0.446  
Char. 43: 0.530 --> 0.512  
Char. 45: 0.615 --> 0.554  
Char. 62: 0.368-0.486 --> 0.346  
Char. 89: 0.637-0.699 --> 0.526  
Char. 90: 0.612-0.681 --> 0.455

Char. 92: 0.514-0.542 --> 0.458  
Char. 99: 0.297-0.380 --> 0.595  
Char. 101: 0.711 --> 0.881  
Char. 109: 0.679-0.883 --> 0.436  
Char. 110: 0.595-0.867 --> 0.966  
Char. 113: 0.425-0.661 --> 0.844  
Char. 117: 0.642 --> 0.794  
Char. 126: 0.419-0.440 --> 0.713  
Char. 323: 0.498-0.666 --> 0.292  
Char. 332: 0.400-0.417 --> 0.470  
Char. 333: 0.232-0.354 --> 0.394  
Char. 334: 0.212 --> 0.191  
Char. 347: 0.063 --> 0.028  
Char. 348: 0.167 --> 0.148  
Char. 351: 0.166-0.197 --> 0.562  
Char. 354: 0.153-0.230 --> 0.239  
Char. 356: 0.283-0.320 --> 0.826  
Char. 357: 0.393-0.432 --> 0.120  
Char. 359: 0.413 --> 0.568  
Char. 361: 0.249 --> 0.330  
Char. 418: 2 --> 1  
Char. 438: 1 --> 0

Harbin :

Char. 0: 0.522-0.666 --> 0.674  
Char. 4: 0.615 --> 0.700  
Char. 7: 0.363 --> 0.549  
Char. 8: 0.339-0.384 --> 0.438  
Char. 11: 0.534 --> 0.557  
Char. 14: 0.348-0.556 --> 0.227  
Char. 16: 0.610 --> 0.706  
Char. 19: 0.460 --> 0.348  
Char. 20: 0.830-0.868 --> 0.898  
Char. 21: 0.479-0.545 --> 0.475  
Char. 23: 0.864 --> 0.911  
Char. 24: 0.606 --> 0.638  
Char. 25: 0.604 --> 0.655  
Char. 26: 0.599 --> 0.655  
Char. 27: 0.463-0.501 --> 0.406  
Char. 28: 0.461 --> 0.218  
Char. 29: 0.531 --> 0.689  
Char. 30: 0.525 --> 0.591

Char. 32: 0.448-0.453 --> 0.514  
Char. 35: 0.623 --> 0.712  
Char. 36: 0.621-0.706 --> 0.708  
Char. 37: 0.581 --> 0.613  
Char. 38: 0.264 --> 0.411  
Char. 39: 0.479-0.756 --> 0.793  
Char. 40: 0.468-0.546 --> 0.565  
Char. 46: 0.658-0.665 --> 0.588  
Char. 47: 0.802 --> 0.972  
Char. 49: 0.754 --> 0.847  
Char. 50: 0.544-0.547 --> 0.451  
Char. 51: 0.806 --> 0.999  
Char. 52: 0.785 --> 0.907  
Char. 53: 0.642 --> 0.688  
Char. 54: 0.182-0.372 --> 0.868  
Char. 55: 0.557 --> 0.478  
Char. 56: 0.453-0.534 --> 0.681  
Char. 57: 0.423-0.634 --> 0.270  
Char. 61: 0.211 --> 0.193  
Char. 62: 0.368-0.486 --> 0.507  
Char. 63: 0.303 --> 0.191  
Char. 65: 0.663-0.739 --> 0.844  
Char. 66: 0.590-0.630 --> 0.691  
Char. 67: 0.354 --> 0.277  
Char. 68: 0.519-0.531 --> 0.552  
Char. 71: 0.619 --> 0.527  
Char. 73: 0.377-0.395 --> 0.350  
Char. 74: 0.504 --> 0.539  
Char. 75: 0.369 --> 0.417  
Char. 77: 0.531 --> 0.619  
Char. 79: 0.496 --> 0.627  
Char. 81: 0.792 --> 0.885  
Char. 84: 0.250 --> 0.369  
Char. 85: 0.618 --> 0.744  
Char. 86: 0.715 --> 0.820  
Char. 87: 0.617 --> 0.816  
Char. 88: 0.624 --> 0.793  
Char. 89: 0.637-0.699 --> 0.833  
Char. 90: 0.612-0.681 --> 0.799  
Char. 92: 0.514-0.542 --> 0.614  
Char. 93: 0.344-0.609 --> 0.652

Char. 94: 0.400 --> 0.505  
Char. 95: 0.467 --> 0.506  
Char. 97: 0.155-0.307 --> 0.027  
Char. 100: 0.167-0.172 --> 0.115  
Char. 105: 0.282-0.315 --> 0.341  
Char. 109: 0.679-0.883 --> 1.000  
Char. 112: 0.342-0.467 --> 0.751  
Char. 118: 0.588 --> 0.970  
Char. 119: 0.678 --> 0.838  
Char. 120: 0.710 --> 0.800  
Char. 121: 0.335 --> 0.398  
Char. 122: 0.329-0.366 --> 0.000  
Char. 123: 0.784 --> 0.711  
Char. 124: 0.268-0.349 --> 0.203  
Char. 125: 0.162 --> 0.206  
Char. 126: 0.419-0.440 --> 0.263  
Char. 128: 0.360-0.461 --> 0.539  
Char. 129: 0.203-0.237 --> 0.249  
Char. 130: 0.597-0.654 --> 0.580  
Char. 132: 0.537 --> 0.652  
Char. 133: 0.303-0.338 --> 0.281  
Char. 136: 0.180 --> 0.282  
Char. 137: 0.586 --> 0.648  
Char. 138: 0.357-0.468 --> 0.595  
Char. 235: 0.390 --> 0.526  
Char. 236: 0.296 --> 0.565  
Char. 237: 0.533-0.545 --> 0.742  
Char. 239: 0.200-0.400 --> 0.000  
Char. 241: 0.500 --> 0.100  
Char. 321: 0.789-0.864 --> 0.879  
Char. 322: 0.825-0.829 --> 0.909  
Char. 323: 0.498-0.666 --> 0.742  
Char. 325: 0.280-0.400 --> 0.212  
Char. 326: 0.316-0.370 --> 0.260  
Char. 328: 0.213-0.216 --> 0.303  
Char. 329: 0.135-0.316 --> 0.333  
Char. 331: 0.310 --> 0.382  
Char. 334: 0.212-0.243 --> 0.331  
Char. 335: 0.186 --> 0.000  
Char. 336: 0.231 --> 0.399  
Char. 337: 0.388 --> 0.561

Char. 339: 0.276 --> 0.257  
Char. 340: 0.596 --> 0.777  
Char. 341: 0.385-0.458 --> 0.214  
Char. 342: 0.324 --> 0.179  
Char. 343: 0.343 --> 0.181  
Char. 344: 0.034-0.184 --> 0.256  
Char. 346: 0.480 --> 0.654  
Char. 349: 0.170 --> 0.127  
Char. 360: 0.338 --> 0.400  
Char. 361: 0.234-0.249 --> 0.192  
Char. 362: 0.337-0.404 --> 0.000  
Char. 363: 0.458-0.469 --> 0.000  
Char. 364: 0.260 --> 0.000  
Char. 367: 0.567-0.722 --> 0.778  
Char. 369: 0.340 --> 0.472  
Char. 370: 0.355 --> 0.485  
Char. 415: 0 --> 1  
Char. 422: 2 --> 1  
Char. 442: 1 --> 0  
Char. 487: 0 --> 1  
Char. 490: 2 --> 1  
Char. 496: 1 --> 2  
Char. 516: 2 --> 0  
Char. 523: 1 --> 0  
Char. 613: 2 --> 3

Jinniushan :

Char. 9: 0.396 --> 0.392  
Char. 14: 0.348-0.556 --> 1.000  
Char. 15: 0.300-0.575 --> 0.262  
Char. 17: 0.344-0.599 --> 0.318  
Char. 18: 0.399-0.703 --> 0.353  
Char. 24: 0.355-0.389 --> 0.334  
Char. 25: 0.344-0.398 --> 0.266  
Char. 29: 0.496 --> 0.217  
Char. 32: 0.448-0.453 --> 0.186  
Char. 34: 0.370-0.516 --> 0.160  
Char. 35: 0.575-0.605 --> 0.308  
Char. 36: 0.567-0.683 --> 0.320  
Char. 38: 0.239-0.264 --> 0.202  
Char. 41: 0.262-0.276 --> 0.379  
Char. 42: 0.553-0.666 --> 0.477

Char. 43: 0.530 --> 0.451  
Char. 44: 0.372-0.472 --> 0.274  
Char. 45: 0.615 --> 0.598  
Char. 47: 0.595-0.702 --> 0.338  
Char. 49: 0.746-0.754 --> 0.279  
Char. 51: 0.693-0.716 --> 0.000  
Char. 52: 0.562-0.589 --> 0.293  
Char. 54: 0.182-0.372 --> 0.090  
Char. 56: 0.453-0.534 --> 0.158  
Char. 57: 0.423-0.634 --> 0.700  
Char. 58: 0.566-0.602 --> 0.476  
Char. 59: 0.516-0.528 --> 0.440  
Char. 60: 0.478-0.505 --> 0.582  
Char. 65: 0.524-0.736 --> 0.411  
Char. 69: 0.243-0.253 --> 0.449  
Char. 70: 0.203-0.295 --> 0.147  
Char. 72: 0.250-0.265 --> 0.206  
Char. 74: 0.477-0.504 --> 0.453  
Char. 76: 0.314-0.340 --> 0.144  
Char. 77: 0.333-0.499 --> 0.176  
Char. 80: 0.756-0.769 --> 0.248  
Char. 81: 0.450-0.474 --> 0.423  
Char. 82: 0.649-0.674 --> 0.477  
Char. 84: 0.129-0.250 --> 0.061  
Char. 91: 0.409 --> 0.366  
Char. 97: 0.155-0.307 --> 0.344  
Char. 100: 0.200-0.213 --> 0.222  
Char. 101: 0.632-0.711 --> 0.726  
Char. 102: 0.459-0.514 --> 0.734  
Char. 107: 0.512-0.867 --> 1.000  
Char. 108: 0.353-0.359 --> 0.329  
Char. 114: 0.250-0.373 --> 0.183  
Char. 115: 0.370 --> 0.366  
Char. 116: 0.333-0.380 --> 0.207  
Char. 117: 0.524-0.543 --> 0.415  
Char. 118: 0.356-0.570 --> 0.342  
Char. 120: 0.433-0.539 --> 0.416  
Char. 121: 0.268 --> 0.113  
Char. 127: 0.645-0.722 --> 0.771  
Char. 128: 0.360-0.461 --> 0.280  
Char. 129: 0.203-0.237 --> 0.100

Char. 130: 0.597-0.654 --> 0.813  
Char. 132: 0.492-0.537 --> 0.441  
Char. 133: 0.303-0.338 --> 0.340  
Char. 200: 0.413-0.444 --> 0.340  
Char. 202: 0.750 --> 0.500  
Char. 203: 0.500 --> 0.375  
Char. 216: 0.318 --> 0.308  
Char. 226: 0.542-0.561 --> 0.484  
Char. 228: 0.330 --> 0.376  
Char. 229: 0.333 --> 0.000  
Char. 233: 0.000 --> 0.666  
Char. 236: 0.212-0.296 --> 0.150  
Char. 237: 0.533-0.545 --> 0.492  
Char. 238: 0.227-0.274 --> 0.197  
Char. 241: 0.500 --> 0.800  
Char. 320: 0.335-0.356 --> 0.196  
Char. 324: 0.630-0.640 --> 0.804  
Char. 325: 0.280-0.400 --> 0.580  
Char. 327: 0.434-0.528 --> 0.208  
Char. 329: 0.135-0.316 --> 0.116  
Char. 330: 0.589-0.745 --> 0.755  
Char. 335: 0.210 --> 0.534  
Char. 336: 0.173-0.219 --> 0.079  
Char. 337: 0.257 --> 0.208  
Char. 338: 0.363-0.366 --> 0.426  
Char. 340: 0.583-0.596 --> 0.481  
Char. 341: 0.385-0.458 --> 0.492  
Char. 344: 0.034-0.184 --> 0.000  
Char. 347: 0.132-0.151 --> 0.160  
Char. 348: 0.317-0.402 --> 0.559  
Char. 352: 0.350 --> 0.419  
Char. 353: 0.302-0.591 --> 0.707  
Char. 358: 0.269-0.270 --> 0.153  
Char. 359: 0.278-0.413 --> 0.000  
Char. 363: 0.458-0.469 --> 0.500  
Char. 365: 0.602-0.888 --> 0.905  
Char. 366: 0.301-0.313 --> 0.239  
Char. 367: 0.567-0.722 --> 0.475  
Char. 429: 0 --> 1  
Char. 450: 1 --> 0  
Char. 451: 0 --> 1

Char. 480: 1 --> 0  
Char. 481: 1 --> 0  
Char. 611: 2 --> 1

Maba :

Char. 2: 0.347 --> 0.307  
Char. 20: 0.824-0.827 --> 0.690  
Char. 21: 0.604-0.666 --> 0.583  
Char. 22: 0.585-0.640 --> 0.523  
Char. 41: 0.307-0.349 --> 0.357  
Char. 42: 0.484 --> 0.561  
Char. 43: 0.414-0.506 --> 0.573  
Char. 44: 0.474 --> 0.488  
Char. 46: 0.533 --> 0.487  
Char. 52: 0.394 --> 0.292  
Char. 60: 0.544-0.615 --> 0.472  
Char. 62: 0.306 --> 0.281  
Char. 68: 0.327 --> 0.553  
Char. 69: 0.243-0.253 --> 0.512  
Char. 85: 0.481 --> 0.335  
Char. 86: 0.385-0.462 --> 0.379  
Char. 87: 0.314-0.414 --> 0.512  
Char. 88: 0.338-0.433 --> 0.624  
Char. 89: 0.502 --> 0.362  
Char. 90: 0.514 --> 0.306  
Char. 92: 0.427-0.429 --> 0.335  
Char. 95: 0.291 --> 0.143  
Char. 126: 0.566-0.604 --> 0.447  
Char. 321: 0.793-0.836 --> 0.749  
Char. 345: 0.502 --> 0.501  
Char. 346: 0.467-0.498 --> 0.459  
Char. 348: 0.317-0.324 --> 0.200  
Char. 349: 0.196 --> 0.151  
Char. 356: 0.410-0.441 --> 0.573  
Char. 429: 0 --> 1

Xuchang :

Char. 0: 0.585-0.595 --> 0.989  
Char. 5: 0.343-0.347 --> 0.000  
Char. 6: 0.321-0.327 --> 0.000  
Char. 20: 0.824-0.827 --> 0.855  
Char. 22: 0.585-0.640 --> 0.726  
Char. 23: 0.753-0.822 --> 0.992

Char. 24: 0.592-0.597 --> 0.646  
Char. 32: 0.384 --> 0.091  
Char. 33: 0.402-0.437 --> 0.342  
Char. 36: 0.419-0.472 --> 0.263  
Char. 39: 0.391-0.404 --> 0.000  
Char. 40: 0.468-0.472 --> 0.386  
Char. 42: 0.425-0.481 --> 0.364  
Char. 45: 0.593 --> 0.531  
Char. 50: 0.539-0.659 --> 0.516  
Char. 52: 0.562-0.607 --> 0.852  
Char. 53: 0.642-0.670 --> 0.942  
Char. 59: 0.536-0.552 --> 0.528  
Char. 62: 0.306-0.541 --> 0.699  
Char. 64: 0.346 --> 0.201  
Char. 65: 0.524 --> 0.235  
Char. 67: 0.209-0.241 --> 0.050  
Char. 82: 0.680-0.699 --> 1.000  
Char. 87: 0.314-0.414 --> 0.231  
Char. 88: 0.338-0.433 --> 0.275  
Char. 138: 0.371 --> 0.169  
Char. 320: 0.649 --> 0.707  
Char. 322: 0.888-0.937 --> 1.000  
Char. 323: 0.413-0.528 --> 0.000  
Char. 324: 0.549-0.601 --> 0.509  
Char. 331: 0.330-0.476 --> 0.220  
Char. 332: 0.382-0.395 --> 0.195  
Char. 333: 0.417-0.466 --> 0.308  
Char. 335: 0.184-0.189 --> 0.214  
Char. 337: 0.303-0.432 --> 0.588  
Char. 338: 0.363-0.366 --> 0.198  
Char. 341: 0.252-0.287 --> 0.159  
Char. 345: 0.579-0.668 --> 0.741  
Char. 463: 1 --> 2  
Char. 464: 1 --> 2  
Char. 477: 0 --> 1  
Char. 479: 0 --> 1  
Char. 491: 1 --> 0  
Char. 496: 1 --> 2  
Char. 511: 0 --> 1  
Char. 516: 2 --> 0  
Char. 517: 1 --> 0

Mauer\_1 :

Char. 141: 0.402-0.564 --> 0.763  
Char. 142: 0.339 --> 0.306  
Char. 145: 0.341-0.346 --> 1.000  
Char. 146: 0.364 --> 0.170  
Char. 147: 0.377-0.389 --> 0.364  
Char. 148: 0.498-0.531 --> 1.000  
Char. 149: 0.476-0.564 --> 0.906  
Char. 150: 0.535-0.656 --> 0.803  
Char. 151: 0.327 --> 0.246  
Char. 152: 0.365-0.567 --> 0.195  
Char. 153: 0.412-0.548 --> 0.320  
Char. 154: 0.228-0.436 --> 0.192  
Char. 155: 0.551-0.577 --> 0.314  
Char. 156: 0.218-0.401 --> 0.000  
Char. 157: 0.341 --> 0.240  
Char. 158: 0.482 --> 0.456  
Char. 162: 0.947 --> 0.950  
Char. 163: 0.699-0.844 --> 0.675  
Char. 164: 0.428-0.479 --> 0.346  
Char. 165: 0.704-0.726 --> 0.915  
Char. 166: 0.906-0.908 --> 0.861  
Char. 167: 0.396-0.430 --> 0.139  
Char. 168: 0.337-0.372 --> 0.131  
Char. 169: 0.491-0.492 --> 0.068  
Char. 170: 0.486-0.565 --> 0.198  
Char. 171: 0.521-0.575 --> 0.145  
Char. 172: 0.451-0.525 --> 0.133  
Char. 173: 0.748-0.794 --> 0.608  
Char. 174: 0.340-0.431 --> 0.000  
Char. 175: 0.696-0.702 --> 0.586  
Char. 176: 0.585-0.706 --> 0.283  
Char. 177: 0.475-0.480 --> 0.296  
Char. 178: 0.508-0.583 --> 0.328  
Char. 179: 0.729-0.802 --> 0.436  
Char. 186: 0.252-0.260 --> 0.155  
Char. 187: 0.603-0.629 --> 0.683  
Char. 188: 0.328 --> 0.186  
Char. 272: 0.295-0.419 --> 0.210  
Char. 273: 0.539 --> 0.432  
Char. 274: 0.716 --> 0.935  
Char. 275: 0.222-0.333 --> 0.111  
Char. 276: 0.309 --> 0.189  
Char. 277: 0.231-0.321 --> 0.109  
Char. 278: 0.251-0.284 --> 0.211  
Char. 281: 0.323-0.365 --> 0.065  
Char. 282: 0.231-0.292 --> 0.121  
Char. 283: 0.523 --> 0.798  
Char. 284: 0.375-0.791 --> 0.250  
Char. 285: 0.000 --> 0.333  
Char. 288: 0.200 --> 0.400  
Char. 289: 0.212-0.238 --> 0.172  
Char. 292: 0.558 --> 1.000  
Char. 293: 0.500-1.000 --> 0.250  
Char. 294: 0.000-0.166 --> 0.333  
Char. 295: 0.222 --> 0.111  
Char. 297: 0.333-0.666 --> 1.000  
Char. 298: 0.236-0.363 --> 0.228  
Char. 300: 0.636-0.655 --> 0.675  
Char. 301: 0.627-0.722 --> 0.780  
Char. 302: 0.875 --> 1.000  
Char. 303: 0.250 --> 0.500  
Char. 375: 0.263-0.362 --> 0.724  
Char. 376: 0.380 --> 0.148  
Char. 379: 0.848 --> 0.915  
Char. 380: 0.641 --> 1.000  
Char. 381: 0.879 --> 1.000  
Char. 382: 0.676 --> 1.000  
Char. 384: 0.378-0.385 --> 0.362  
Char. 385: 0.437 --> 0.736  
Char. 387: 0.551-0.559 --> 0.886  
Char. 388: 0.502-0.515 --> 0.869  
Char. 389: 0.673-0.675 --> 0.824  
Char. 390: 0.347-0.365 --> 0.600  
Char. 391: 0.612 --> 0.628  
Char. 392: 0.451-0.585 --> 0.332  
Char. 393: 0.781 --> 0.694  
Char. 394: 0.376-0.395 --> 0.297  
Char. 395: 0.200 --> 0.145  
Char. 396: 0.216 --> 0.166  
Char. 397: 0.199-0.218 --> 0.108  
Char. 398: 0.127 --> 0.036

Char. 399: 0.416 --> 0.507  
Char. 534: 0 --> 1  
Char. 558: 2 --> 0  
Char. 561: 0 --> 1  
Char. 567: 0 --> 1  
Char. 626: 1 --> 2

Arago\_II\_XIII\_XXI\_XLVII :

Char. 140: 0.341 --> 0.295  
Char. 141: 0.402-0.564 --> 0.309  
Char. 143: 0.479-0.560 --> 0.421  
Char. 145: 0.341-0.346 --> 0.234  
Char. 148: 0.498-0.531 --> 0.223  
Char. 151: 0.327 --> 0.400  
Char. 152: 0.365-0.567 --> 0.635  
Char. 153: 0.412-0.548 --> 0.601  
Char. 154: 0.228-0.436 --> 0.445  
Char. 155: 0.551-0.577 --> 0.926  
Char. 159: 0.466 --> 0.401  
Char. 160: 0.618 --> 0.596  
Char. 161: 0.632 --> 0.493  
Char. 163: 0.699-0.844 --> 0.990  
Char. 164: 0.428-0.479 --> 0.713  
Char. 166: 0.906-0.908 --> 0.944  
Char. 168: 0.337-0.372 --> 0.482  
Char. 169: 0.491-0.492 --> 0.587  
Char. 171: 0.521-0.575 --> 0.686  
Char. 172: 0.451-0.525 --> 0.622  
Char. 173: 0.748-0.794 --> 0.812  
Char. 175: 0.696-0.702 --> 0.892  
Char. 176: 0.585-0.706 --> 0.785  
Char. 177: 0.475-0.480 --> 0.882  
Char. 178: 0.508-0.583 --> 0.751  
Char. 180: 0.574 --> 0.652  
Char. 181: 0.471 --> 0.611  
Char. 182: 0.389 --> 0.495  
Char. 183: 0.333 --> 0.419  
Char. 184: 0.332-0.342 --> 0.421  
Char. 185: 0.358-0.400 --> 0.517  
Char. 271: 0.205-0.248 --> 0.571  
Char. 272: 0.295-0.419 --> 0.659  
Char. 277: 0.231-0.321 --> 0.396

Char. 278: 0.251-0.284 --> 0.410  
Char. 279: 0.528-0.621 --> 0.510  
Char. 282: 0.231-0.292 --> 0.351  
Char. 284: 0.375-0.791 --> 1.000  
Char. 289: 0.212-0.238 --> 0.350  
Char. 290: 0.273-0.368 --> 0.388  
Char. 291: 0.482 --> 0.340  
Char. 301: 0.627-0.722 --> 0.536  
Char. 375: 0.263-0.362 --> 0.214  
Char. 377: 0.290-0.333 --> 0.562  
Char. 378: 0.256 --> 0.179  
Char. 383: 0.783 --> 0.810  
Char. 387: 0.551-0.559 --> 0.544  
Char. 388: 0.502-0.515 --> 0.497  
Char. 389: 0.673-0.675 --> 0.653  
Char. 390: 0.347-0.365 --> 0.208  
Char. 394: 0.376-0.395 --> 0.405  
Char. 397: 0.199-0.218 --> 0.240  
Char. 539: 1 --> 0  
Char. 624: 0 --> 2  
Char. 629: 1 --> 2  
Char. 633: 1 --> 2

Broken\_Hill :

Char. 0: 0.504-0.529 --> 0.554  
Char. 5: 0.551 --> 0.813  
Char. 6: 0.327-0.330 --> 0.581  
Char. 8: 0.357-0.442 --> 0.314  
Char. 9: 0.506-0.535 --> 0.455  
Char. 10: 0.455-0.477 --> 0.330  
Char. 11: 0.423 --> 0.474  
Char. 13: 0.289-0.352 --> 0.493  
Char. 17: 0.634-0.815 --> 0.459  
Char. 19: 0.366-0.399 --> 0.435  
Char. 20: 0.824-0.827 --> 0.701  
Char. 21: 0.300 --> 0.033  
Char. 22: 0.585-0.588 --> 0.607  
Char. 23: 0.745-0.811 --> 0.822  
Char. 24: 0.592-0.597 --> 0.360  
Char. 25: 0.535-0.564 --> 0.353  
Char. 26: 0.462 --> 0.510  
Char. 27: 0.441-0.599 --> 0.364

Char. 29: 0.670 --> 0.715  
Char. 30: 0.472 --> 0.388  
Char. 31: 0.528 --> 0.387  
Char. 33: 0.204-0.420 --> 0.080  
Char. 34: 0.614-0.671 --> 0.541  
Char. 37: 0.558-0.581 --> 0.346  
Char. 38: 0.461-0.487 --> 0.559  
Char. 39: 0.520 --> 0.781  
Char. 42: 0.464 --> 0.526  
Char. 45: 0.687 --> 0.749  
Char. 48: 0.567-0.599 --> 0.674  
Char. 50: 0.539-0.592 --> 0.605  
Char. 52: 0.475-0.520 --> 0.398  
Char. 53: 0.642-0.704 --> 0.532  
Char. 54: 0.910 --> 1.000  
Char. 55: 0.269 --> 0.046  
Char. 56: 0.376-0.387 --> 0.476  
Char. 58: 0.523-0.566 --> 0.507  
Char. 65: 0.744 --> 0.874  
Char. 66: 0.301-0.550 --> 0.672  
Char. 67: 0.453 --> 0.475  
Char. 68: 0.609-0.639 --> 0.656  
Char. 71: 0.482 --> 0.708  
Char. 77: 0.608 --> 0.615  
Char. 78: 0.452 --> 0.535  
Char. 79: 0.617-0.638 --> 0.497  
Char. 80: 0.684-0.756 --> 0.761  
Char. 82: 0.680-0.734 --> 0.562  
Char. 87: 0.660 --> 0.829  
Char. 88: 0.608 --> 0.814  
Char. 89: 0.796 --> 0.815  
Char. 92: 0.503-0.534 --> 0.729  
Char. 94: 0.465-0.549 --> 0.317  
Char. 96: 0.414-0.659 --> 0.370  
Char. 97: 0.425 --> 0.064  
Char. 98: 0.297-0.523 --> 0.634  
Char. 100: 0.347 --> 0.472  
Char. 101: 0.694 --> 0.713  
Char. 103: 0.480 --> 0.541  
Char. 105: 0.475 --> 0.310  
Char. 106: 0.524-0.661 --> 0.469

Char. 108: 0.677 --> 0.838  
Char. 110: 0.773 --> 0.816  
Char. 111: 0.531-0.694 --> 0.363  
Char. 112: 0.588-0.623 --> 0.792  
Char. 115: 0.477-0.501 --> 0.467  
Char. 116: 0.492 --> 0.342  
Char. 124: 0.256 --> 0.101  
Char. 126: 0.424 --> 0.282  
Char. 132: 0.737 --> 0.735  
Char. 133: 0.488-0.541 --> 0.311  
Char. 134: 0.339-0.475 --> 0.308  
Char. 136: 0.281 --> 0.348  
Char. 137: 0.654 --> 0.571  
Char. 138: 0.507-0.600 --> 0.470  
Char. 139: 0.326 --> 0.292  
Char. 206: 0.618 --> 0.625  
Char. 207: 0.302 --> 0.449  
Char. 209: 0.327-0.345 --> 0.637  
Char. 214: 0.323-0.346 --> 0.242  
Char. 216: 0.639 --> 0.643  
Char. 217: 0.336-0.464 --> 0.000  
Char. 228: 0.265-0.330 --> 0.253  
Char. 230: 0.428 --> 0.285  
Char. 237: 0.473-0.618 --> 0.432  
Char. 241: 0.600 --> 0.700  
Char. 245: 0.194-0.276 --> 0.159  
Char. 247: 0.519 --> 0.648  
Char. 248: 0.221-0.281 --> 0.158  
Char. 250: 0.333 --> 0.166  
Char. 254: 0.000-0.500 --> 1.000  
Char. 320: 0.480-0.499 --> 0.216  
Char. 321: 0.793-0.836 --> 0.716  
Char. 323: 0.668 --> 0.901  
Char. 324: 0.549-0.601 --> 0.642  
Char. 325: 0.341-0.370 --> 0.301  
Char. 326: 0.380-0.562 --> 0.289  
Char. 327: 0.537-0.562 --> 0.573  
Char. 328: 0.317-0.389 --> 0.459  
Char. 332: 0.369-0.382 --> 0.493  
Char. 334: 0.201-0.222 --> 0.242  
Char. 336: 0.286-0.292 --> 0.226



Char. 337: 0.299-0.345 --> 0.200  
Char. 341: 0.334 --> 0.458  
Char. 343: 0.179-0.210 --> 0.239  
Char. 347: 0.074-0.100 --> 0.047  
Char. 349: 0.333 --> 0.158  
Char. 352: 0.418 --> 0.525  
Char. 353: 0.500-0.569 --> 0.414  
Char. 354: 0.405-0.481 --> 0.120  
Char. 355: 0.249-0.374 --> 0.155  
Char. 356: 0.441 --> 0.473  
Char. 357: 0.332 --> 0.166  
Char. 359: 0.634 --> 0.577  
Char. 366: 0.347 --> 0.464  
Char. 367: 0.737-0.797 --> 0.871  
Char. 369: 0.469 --> 0.462  
Char. 371: 0.308 --> 0.286  
Char. 372: 0.305 --> 0.280  
Char. 401: 0 --> 1  
Char. 412: 1 --> 2  
Char. 439: 0 --> 1  
Char. 460: 0 --> 1  
Char. 467: 0 --> 1  
Char. 469: 0 --> 1

Petralona\_1 :

Char. 0: 0.504-0.529 --> 0.486  
Char. 1: 0.624 --> 0.786  
Char. 2: 0.579 --> 0.678  
Char. 3: 0.757 --> 0.841  
Char. 4: 0.580 --> 0.680  
Char. 6: 0.327-0.330 --> 0.221  
Char. 7: 0.383-0.415 --> 0.625  
Char. 8: 0.357-0.442 --> 0.512  
Char. 9: 0.506-0.535 --> 0.647  
Char. 14: 0.489-0.647 --> 0.745  
Char. 15: 0.418-0.478 --> 0.827  
Char. 16: 0.582-0.590 --> 0.670  
Char. 17: 0.634-0.815 --> 0.828  
Char. 18: 0.508-0.636 --> 0.731  
Char. 19: 0.366-0.399 --> 0.176  
Char. 20: 0.824-0.827 --> 0.865  
Char. 22: 0.585-0.588 --> 0.584

Char. 23: 0.745-0.811 --> 0.634  
Char. 24: 0.592-0.597 --> 0.682  
Char. 25: 0.535-0.564 --> 0.677  
Char. 27: 0.441-0.599 --> 0.658  
Char. 28: 0.569 --> 0.810  
Char. 29: 0.670 --> 0.626  
Char. 33: 0.204-0.420 --> 0.424  
Char. 34: 0.614-0.671 --> 0.770  
Char. 35: 0.635-0.643 --> 0.732  
Char. 36: 0.638-0.803 --> 0.850  
Char. 37: 0.558-0.581 --> 0.647  
Char. 38: 0.461-0.487 --> 0.299  
Char. 43: 0.396 --> 0.420  
Char. 44: 0.290 --> 0.220  
Char. 46: 0.553-0.563 --> 0.691  
Char. 47: 0.668 --> 0.761  
Char. 48: 0.567-0.599 --> 0.499  
Char. 49: 0.816 --> 0.942  
Char. 50: 0.539-0.592 --> 0.504  
Char. 51: 0.719 --> 0.813  
Char. 52: 0.475-0.520 --> 0.653  
Char. 53: 0.642-0.704 --> 0.810  
Char. 59: 0.476 --> 0.440  
Char. 60: 0.648 --> 0.609  
Char. 61: 0.325-0.386 --> 0.244  
Char. 62: 0.486 --> 0.349  
Char. 63: 0.331-0.349 --> 0.246  
Char. 64: 0.258-0.348 --> 0.235  
Char. 68: 0.609-0.639 --> 0.316  
Char. 69: 0.441-0.449 --> 0.000  
Char. 72: 0.369 --> 0.378  
Char. 76: 0.422-0.436 --> 0.075  
Char. 79: 0.617-0.638 --> 1.000  
Char. 81: 0.579 --> 0.777  
Char. 82: 0.680-0.734 --> 0.887  
Char. 85: 0.732-0.748 --> 0.775  
Char. 86: 0.796-0.801 --> 0.897  
Char. 90: 0.772-0.784 --> 0.885  
Char. 92: 0.503-0.534 --> 0.456  
Char. 93: 0.614 --> 0.651  
Char. 94: 0.465-0.549 --> 0.586

Char. 95: 0.518-0.620 --> 0.648  
Char. 98: 0.297-0.523 --> 0.177  
Char. 99: 0.782 --> 0.833  
Char. 102: 0.519-0.549 --> 0.573  
Char. 104: 0.809 --> 0.920  
Char. 105: 0.475 --> 0.603  
Char. 106: 0.524-0.661 --> 0.887  
Char. 107: 0.738-0.797 --> 0.959  
Char. 109: 0.709 --> 0.718  
Char. 110: 0.773 --> 0.551  
Char. 113: 0.805-0.807 --> 0.966  
Char. 114: 0.735 --> 0.822  
Char. 115: 0.477-0.501 --> 0.529  
Char. 116: 0.492 --> 0.565  
Char. 118: 0.565 --> 0.581  
Char. 119: 0.621 --> 0.757  
Char. 120: 0.682-0.727 --> 0.891  
Char. 121: 0.614-0.645 --> 0.879  
Char. 125: 0.249 --> 0.253  
Char. 127: 0.663-0.753 --> 0.917  
Char. 128: 0.610 --> 0.713  
Char. 131: 0.468 --> 0.582  
Char. 132: 0.737 --> 0.782  
Char. 133: 0.488-0.541 --> 0.797  
Char. 135: 0.454 --> 0.604  
Char. 138: 0.507-0.600 --> 0.872  
Char. 208: 0.538 --> 0.312  
Char. 209: 0.327-0.345 --> 0.205  
Char. 214: 0.323-0.346 --> 0.508  
Char. 215: 0.242 --> 0.481  
Char. 226: 0.641 --> 0.642  
Char. 227: 0.385 --> 0.506  
Char. 228: 0.265-0.330 --> 0.438  
Char. 233: 0.000 --> 1.000  
Char. 235: 0.444-0.452 --> 0.364  
Char. 236: 0.305-0.341 --> 0.420  
Char. 237: 0.473-0.618 --> 0.822  
Char. 238: 0.215 --> 0.133  
Char. 253: 0.000 --> 0.125  
Char. 320: 0.480-0.499 --> 0.551  
Char. 321: 0.793-0.836 --> 0.930

Char. 322: 0.818-0.887 --> 0.695  
Char. 324: 0.549-0.601 --> 0.309  
Char. 326: 0.380-0.562 --> 0.625  
Char. 328: 0.317-0.389 --> 0.162  
Char. 329: 0.431 --> 0.271  
Char. 333: 0.280 --> 0.261  
Char. 335: 0.184 --> 0.182  
Char. 337: 0.299-0.345 --> 0.371  
Char. 338: 0.399 --> 0.459  
Char. 340: 0.788 --> 0.802  
Char. 342: 0.233 --> 0.039  
Char. 344: 0.265 --> 0.238  
Char. 346: 0.745-0.777 --> 0.802  
Char. 348: 0.176-0.271 --> 0.148  
Char. 351: 0.538 --> 0.596  
Char. 353: 0.500-0.569 --> 0.969  
Char. 354: 0.405-0.481 --> 0.532  
Char. 355: 0.249-0.374 --> 0.534  
Char. 356: 0.441 --> 0.257  
Char. 358: 0.619 --> 0.620  
Char. 359: 0.634 --> 0.708  
Char. 362: 0.425-0.628 --> 0.723  
Char. 363: 0.473-0.741 --> 0.755  
Char. 364: 0.480-0.618 --> 0.647  
Char. 365: 0.783 --> 0.885  
Char. 368: 0.639 --> 0.661  
Char. 370: 0.502-0.596 --> 0.319  
Char. 400: 1 --> 2  
Char. 414: 0 --> 1  
Char. 415: 0 --> 1  
Char. 429: 0 --> 1  
Char. 430: 0 --> 1  
Char. 462: 2 --> 1  
Char. 463: 1 --> 2  
Char. 465: 1 --> 0  
Char. 474: 2 --> 1  
Char. 502: 2 --> 1

Ceprano :

Char. 4: 0.453-0.574 --> 0.435  
Char. 5: 0.356-0.551 --> 0.309  
Char. 6: 0.327-0.330 --> 0.191

Char. 15: 0.418-0.478 --> 0.813  
Char. 16: 0.582-0.590 --> 0.672  
Char. 18: 0.545-0.636 --> 1.000  
Char. 23: 0.745-0.811 --> 0.868  
Char. 24: 0.592-0.597 --> 0.715  
Char. 25: 0.564 --> 0.721  
Char. 26: 0.457-0.462 --> 0.684  
Char. 27: 0.599 --> 1.000  
Char. 34: 0.614-0.671 --> 0.692  
Char. 37: 0.558-0.581 --> 0.658  
Char. 39: 0.384-0.520 --> 0.347  
Char. 40: 0.592-0.628 --> 0.643  
Char. 41: 0.377-0.550 --> 0.592  
Char. 42: 0.294-0.425 --> 0.245  
Char. 43: 0.274-0.295 --> 0.231  
Char. 44: 0.290 --> 0.269  
Char. 47: 0.621-0.668 --> 0.795  
Char. 48: 0.567-0.599 --> 0.718  
Char. 49: 0.764-0.816 --> 0.901  
Char. 53: 0.651-0.704 --> 0.758  
Char. 62: 0.486-0.541 --> 0.591  
Char. 65: 0.395 --> 0.353  
Char. 69: 0.441-0.449 --> 0.518  
Char. 79: 0.638 --> 0.720  
Char. 80: 0.684-0.756 --> 0.188  
Char. 86: 0.796-0.801 --> 0.809  
Char. 93: 0.571-0.614 --> 0.821  
Char. 94: 0.549 --> 0.724  
Char. 98: 0.297 --> 0.000  
Char. 107: 0.738-0.797 --> 0.731  
Char. 108: 0.667-0.677 --> 0.532  
Char. 126: 0.424-0.434 --> 0.417  
Char. 137: 0.881 --> 1.000  
Char. 320: 0.480-0.499 --> 0.795  
Char. 321: 0.793-0.836 --> 0.879  
Char. 322: 0.818-0.887 --> 0.951  
Char. 323: 0.478-0.668 --> 0.427  
Char. 325: 0.533 --> 0.732  
Char. 326: 0.562 --> 1.000  
Char. 332: 0.369-0.382 --> 0.354  
Char. 335: 0.184-0.189 --> 0.099

Char. 341: 0.252-0.334 --> 0.228  
Char. 348: 0.176-0.271 --> 0.102  
Char. 369: 0.946 --> 1.000  
Char. 415: 0 --> 1  
Char. 466: 0 --> 1  
Char. 502: 2 --> 1

Steinheim :

Char. 0: 0.504-0.536 --> 0.446  
Char. 2: 0.298-0.347 --> 0.173  
Char. 5: 0.343-0.346 --> 0.263  
Char. 6: 0.321-0.415 --> 0.315  
Char. 7: 0.281-0.339 --> 0.177  
Char. 8: 0.339-0.371 --> 0.236  
Char. 9: 0.343-0.396 --> 0.261  
Char. 10: 0.334-0.392 --> 0.285  
Char. 13: 0.347-0.352 --> 0.039  
Char. 15: 0.300-0.388 --> 0.002  
Char. 16: 0.345-0.484 --> 0.000  
Char. 17: 0.344-0.433 --> 0.085  
Char. 18: 0.399-0.474 --> 0.000  
Char. 20: 0.758-0.806 --> 0.660  
Char. 21: 0.625-0.733 --> 0.808  
Char. 22: 0.585-0.588 --> 0.164  
Char. 23: 0.745-0.811 --> 0.675  
Char. 24: 0.355-0.362 --> 0.000  
Char. 25: 0.344-0.382 --> 0.000  
Char. 26: 0.417-0.456 --> 0.252  
Char. 27: 0.340-0.388 --> 0.000  
Char. 29: 0.496 --> 0.000  
Char. 32: 0.452-0.453 --> 0.368  
Char. 33: 0.402-0.437 --> 0.294  
Char. 34: 0.370-0.399 --> 0.000  
Char. 37: 0.297-0.356 --> 0.000  
Char. 38: 0.239-0.369 --> 0.000  
Char. 39: 0.391-0.414 --> 0.191  
Char. 40: 0.468-0.472 --> 0.398  
Char. 43: 0.530-0.612 --> 0.658  
Char. 45: 0.593-0.636 --> 0.563  
Char. 46: 0.445-0.521 --> 0.432  
Char. 49: 0.431-0.567 --> 0.385  
Char. 50: 0.632-0.659 --> 0.565

Char. 59: 0.536-0.552 --> 0.504  
Char. 60: 0.401-0.505 --> 0.376  
Char. 62: 0.287-0.368 --> 0.275  
Char. 64: 0.207-0.277 --> 0.199  
Char. 67: 0.209-0.241 --> 0.188  
Char. 69: 0.243-0.253 --> 0.265  
Char. 72: 0.250-0.265 --> 0.311  
Char. 73: 0.326-0.355 --> 0.300  
Char. 74: 0.477-0.482 --> 0.170  
Char. 75: 0.342-0.346 --> 0.451  
Char. 78: 0.451 --> 0.513  
Char. 80: 0.756 --> 0.000  
Char. 82: 0.649-0.699 --> 0.730  
Char. 85: 0.462 --> 0.207  
Char. 86: 0.385-0.462 --> 0.291  
Char. 87: 0.314-0.527 --> 0.237  
Char. 88: 0.338-0.582 --> 0.306  
Char. 89: 0.460-0.461 --> 0.164  
Char. 90: 0.422-0.559 --> 0.105  
Char. 91: 0.409 --> 0.435  
Char. 92: 0.427-0.429 --> 0.397  
Char. 93: 0.366-0.428 --> 0.534  
Char. 95: 0.339 --> 0.151  
Char. 96: 0.266-0.280 --> 0.027  
Char. 97: 0.155-0.209 --> 0.094  
Char. 98: 0.651-0.759 --> 0.833  
Char. 99: 0.297-0.308 --> 0.269  
Char. 102: 0.459-0.514 --> 0.443  
Char. 106: 0.326-0.468 --> 0.000  
Char. 107: 0.375-0.408 --> 0.094  
Char. 108: 0.353-0.359 --> 0.118  
Char. 109: 0.321-0.400 --> 0.265  
Char. 110: 0.408-0.492 --> 0.323  
Char. 111: 0.305-0.329 --> 0.298  
Char. 112: 0.342-0.467 --> 0.282  
Char. 114: 0.250-0.373 --> 0.149  
Char. 117: 0.543-0.574 --> 0.334  
Char. 118: 0.356-0.471 --> 0.307  
Char. 119: 0.369-0.430 --> 0.241  
Char. 120: 0.433-0.491 --> 0.203  
Char. 121: 0.268 --> 0.000

Char. 125: 0.159-0.162 --> 0.146  
Char. 126: 0.566-0.604 --> 0.691  
Char. 127: 0.398-0.624 --> 0.292  
Char. 129: 0.315-0.337 --> 0.405  
Char. 130: 0.446 --> 0.386  
Char. 131: 0.281-0.357 --> 0.092  
Char. 137: 0.313-0.334 --> 0.000  
Char. 223: 0.220-0.228 --> 0.154  
Char. 226: 0.542-0.561 --> 0.568  
Char. 228: 0.265-0.330 --> 0.020  
Char. 230: 0.571 --> 0.857  
Char. 231: 0.300-0.400 --> 0.100  
Char. 233: 0.000 --> 0.666  
Char. 241: 0.500 --> 0.200  
Char. 320: 0.335-0.441 --> 0.000  
Char. 321: 0.782-0.836 --> 0.937  
Char. 322: 0.888-0.894 --> 1.000  
Char. 323: 0.413-0.498 --> 0.860  
Char. 324: 0.630-0.640 --> 0.667  
Char. 325: 0.250-0.348 --> 0.117  
Char. 326: 0.211-0.316 --> 0.123  
Char. 329: 0.316-0.433 --> 0.000  
Char. 332: 0.423-0.492 --> 0.748  
Char. 333: 0.232-0.283 --> 0.110  
Char. 335: 0.189 --> 0.114  
Char. 338: 0.363-0.366 --> 0.329  
Char. 340: 0.583-0.596 --> 0.735  
Char. 341: 0.252-0.255 --> 0.180  
Char. 343: 0.353-0.600 --> 0.621  
Char. 345: 0.449-0.668 --> 0.417  
Char. 346: 0.498 --> 0.630  
Char. 347: 0.132-0.151 --> 0.188  
Char. 348: 0.317-0.371 --> 0.297  
Char. 349: 0.259-0.383 --> 0.411  
Char. 354: 0.405-0.481 --> 0.578  
Char. 355: 0.276-0.300 --> 0.002  
Char. 358: 0.376-0.380 --> 0.106  
Char. 361: 0.241-0.256 --> 0.196  
Char. 362: 0.337-0.341 --> 0.106  
Char. 363: 0.458-0.469 --> 0.194  
Char. 364: 0.359-0.388 --> 0.307

Char. 365: 0.572-0.849 --> 0.495  
Char. 367: 0.737-0.797 --> 0.885  
Char. 368: 0.550-0.607 --> 0.632  
Char. 369: 0.249-0.284 --> 0.000  
Char. 370: 0.355-0.425 --> 0.096  
Char. 406: 1 --> 0  
Char. 424: 2 --> 1  
Char. 427: 0 --> 1  
Char. 447: 0 --> 1  
Char. 450: 1 --> 0  
Char. 459: 0 --> 2  
Char. 462: 1 --> 2  
Char. 467: 1 --> 0  
Char. 469: 0 --> 1  
Char. 471: 2 --> 1  
Char. 487: 0 --> 1  
Char. 490: 2 --> 1  
Char. 494: 1 --> 2  
Char. 499: 1 --> 0  
Char. 500: 0 --> 1  
Char. 502: 2 --> 1  
Char. 513: 1 --> 0  
Char. 514: 1 --> 0  
Char. 516: 2 --> 0  
Char. 609: 3 --> 2

Saldanha :

Char. 5: 0.356-0.551 --> 0.680  
Char. 6: 0.330 --> 0.504  
Char. 15: 0.418-0.478 --> 0.395  
Char. 16: 0.582-0.590 --> 0.409  
Char. 22: 0.585-0.588 --> 0.619  
Char. 23: 0.745 --> 0.536  
Char. 39: 0.384-0.520 --> 0.637  
Char. 40: 0.592-0.628 --> 0.591  
Char. 42: 0.294-0.425 --> 0.463  
Char. 43: 0.274-0.295 --> 0.378  
Char. 44: 0.290 --> 0.355  
Char. 45: 0.715 --> 0.747  
Char. 58: 0.590 --> 0.669  
Char. 59: 0.560 --> 0.620  
Char. 60: 0.697-0.714 --> 0.656

Char. 62: 0.399 --> 0.263  
Char. 85: 0.732-0.748 --> 0.437  
Char. 86: 0.796-0.801 --> 0.325  
Char. 87: 0.515 --> 0.414  
Char. 89: 0.720 --> 0.449  
Char. 91: 0.675-0.869 --> 0.937  
Char. 92: 0.503-0.534 --> 0.691  
Char. 320: 0.480-0.499 --> 0.242  
Char. 322: 0.818 --> 0.571  
Char. 323: 0.478-0.668 --> 0.758  
Char. 333: 0.417 --> 0.240  
Char. 338: 0.517 --> 0.553  
Char. 345: 0.704-0.893 --> 0.483  
Char. 346: 0.745-0.777 --> 0.479  
Char. 347: 0.074-0.100 --> 0.000  
Char. 401: 0 --> 1  
Char. 419: 1 --> 0

Bodo :

Char. 0: 0.529 --> 0.565  
Char. 1: 0.491-0.558 --> 0.372  
Char. 2: 0.487 --> 0.245  
Char. 20: 0.769 --> 0.699  
Char. 22: 0.585-0.588 --> 0.581  
Char. 46: 0.691 --> 0.695  
Char. 50: 0.627 --> 0.663  
Char. 52: 0.475 --> 0.400  
Char. 60: 0.697-0.714 --> 0.730  
Char. 68: 0.609 --> 0.479  
Char. 69: 0.441 --> 0.421  
Char. 85: 0.732-0.748 --> 0.756  
Char. 88: 0.523 --> 0.486  
Char. 91: 0.675-0.869 --> 0.359  
Char. 92: 0.503-0.534 --> 0.359  
Char. 93: 0.493 --> 0.423  
Char. 126: 0.459 --> 0.516  
Char. 321: 0.793 --> 0.728  
Char. 334: 0.152-0.201 --> 0.144  
Char. 337: 0.243 --> 0.216  
Char. 345: 0.704-0.893 --> 1.000  
Char. 346: 0.745-0.777 --> 0.787  
Char. 347: 0.074-0.100 --> 0.206

Char. 348: 0.176-0.271 --> 0.348  
Char. 402: 1 --> 0  
Char. 414: 0 --> 2  
Char. 418: 1 --> 2  
Char. 459: 0 --> 2  
Char. 462: 2 --> 1  
Char. 480: 0 --> 1  
Char. 481: 0 --> 1  
Char. 518: 1 --> 3

Ternifine\_1\_2\_3\_4 :

Char. 0: 0.504-0.529 --> 0.595  
Char. 15: 0.388-0.478 --> 0.243  
Char. 16: 0.525-0.590 --> 0.220  
Char. 18: 0.475-0.636 --> 0.277  
Char. 26: 0.457-0.462 --> 0.437  
Char. 45: 0.568-0.593 --> 0.370  
Char. 46: 0.479-0.563 --> 0.185  
Char. 47: 0.513-0.644 --> 0.342  
Char. 49: 0.675-0.732 --> 0.420  
Char. 147: 0.377 --> 0.298  
Char. 151: 0.327 --> 0.376  
Char. 152: 0.365-0.567 --> 0.163  
Char. 153: 0.412-0.548 --> 0.272  
Char. 162: 0.817-0.888 --> 0.795  
Char. 166: 0.906-0.908 --> 0.870  
Char. 175: 0.696-0.702 --> 0.601  
Char. 176: 0.585-0.706 --> 0.467  
Char. 181: 0.444-0.471 --> 0.362  
Char. 182: 0.321-0.389 --> 0.291  
Char. 185: 0.358-0.400 --> 0.341  
Char. 261: 0.170-0.213 --> 0.029  
Char. 264: 0.189-0.191 --> 0.024  
Char. 268: 0.721 --> 0.839  
Char. 283: 0.489-0.523 --> 0.364  
Char. 297: 0.333 --> 0.000  
Char. 310: 0.421 --> 1.000  
Char. 311: 0.325 --> 1.000  
Char. 312: 0.285 --> 1.000  
Char. 314: 0.324 --> 1.000  
Char. 315: 0.714 --> 1.000  
Char. 373: 0.232-0.591 --> 0.188

Char. 374: 0.568-0.778 --> 0.927  
Char. 376: 0.380-0.400 --> 0.333  
Char. 379: 0.845-0.848 --> 0.728  
Char. 384: 0.378-0.385 --> 0.709  
Char. 385: 0.320-0.351 --> 0.264  
Char. 386: 0.605-0.606 --> 0.253  
Char. 387: 0.551-0.559 --> 0.489  
Char. 390: 0.347-0.365 --> 0.385  
Char. 393: 0.781-0.811 --> 0.724  
Char. 394: 0.376-0.395 --> 0.310  
Char. 397: 0.199-0.218 --> 0.131  
Char. 399: 0.361-0.416 --> 0.484  
Char. 565: 0 --> 1  
Char. 566: 1 --> 0  
Char. 571: 2 --> 1  
Char. 572: 2 --> 1  
Char. 573: 0 --> 1  
Char. 577: 0 --> 1  
Char. 581: 2 --> 1  
Char. 620: 0 --> 1

Peking\_X\_XII\_XIII\_LII\_RC :

Char. 0: 0.368-0.378 --> 0.433  
Char. 3: 0.608-0.637 --> 0.646  
Char. 16: 0.657-0.752 --> 0.590  
Char. 18: 0.622-0.675 --> 0.535  
Char. 23: 0.534-0.540 --> 0.555  
Char. 26: 0.547 --> 0.488  
Char. 27: 0.441-0.442 --> 0.607  
Char. 44: 0.290 --> 0.297  
Char. 45: 0.568-0.593 --> 0.613  
Char. 48: 0.614 --> 0.586  
Char. 49: 0.675-0.752 --> 0.772  
Char. 52: 0.437-0.520 --> 0.528  
Char. 53: 0.603-0.670 --> 0.713  
Char. 55: 0.269-0.300 --> 0.385  
Char. 59: 0.314-0.416 --> 0.490  
Char. 61: 0.325-0.329 --> 0.190  
Char. 62: 0.631 --> 0.645  
Char. 63: 0.331-0.340 --> 0.191  
Char. 81: 0.570-0.579 --> 0.703  
Char. 82: 0.604-0.699 --> 0.766

Char. 97: 0.425-0.506 --> 0.337  
Char. 98: 0.445 --> 0.358  
Char. 111: 0.531-0.623 --> 0.486  
Char. 112: 0.623 --> 0.755  
Char. 113: 0.691-0.774 --> 0.837  
Char. 114: 0.466 --> 0.397  
Char. 124: 0.319 --> 0.075  
Char. 129: 0.366-0.396 --> 0.346  
Char. 131: 0.309-0.357 --> 0.202  
Char. 132: 0.767 --> 0.681  
Char. 134: 0.339 --> 0.033  
Char. 136: 0.303-0.870 --> 0.190  
Char. 322: 0.506-0.549 --> 0.659  
Char. 323: 0.618-0.677 --> 0.802  
Char. 326: 0.564 --> 0.648  
Char. 333: 0.814 --> 0.828  
Char. 339: 0.301-0.332 --> 0.185  
Char. 354: 0.536 --> 0.457  
Char. 356: 0.496 --> 0.561  
Char. 357: 0.394 --> 0.249  
Char. 359: 0.634-0.678 --> 0.448  
Char. 360: 0.499 --> 0.357  
Char. 366: 0.265-0.346 --> 0.177  
Char. 367: 0.910 --> 0.793  
Char. 416: 1 --> 2  
Char. 437: 1 --> 0  
Char. 474: 2 --> 1  
Char. 477: 0 --> 1  
Char. 478: 1 --> 0  
Char. 482: 0 --> 12

Nanjing1 :

Char. 0: 0.368-0.378 --> 0.260  
Char. 1: 0.491-0.569 --> 0.473  
Char. 2: 0.639-0.652 --> 0.593  
Char. 3: 0.608-0.637 --> 0.600  
Char. 5: 0.571 --> 0.138  
Char. 6: 0.348-0.371 --> 0.038  
Char. 12: 0.624-0.751 --> 0.785  
Char. 20: 0.638 --> 0.579  
Char. 22: 0.482 --> 0.322  
Char. 23: 0.534-0.540 --> 0.302

Char. 39: 0.584-0.745 --> 0.294  
Char. 40: 0.529-0.581 --> 0.358  
Char. 41: 0.257-0.318 --> 0.167  
Char. 42: 0.394-0.397 --> 0.269  
Char. 43: 0.278 --> 0.274  
Char. 46: 0.432 --> 0.265  
Char. 47: 0.513-0.644 --> 0.231  
Char. 49: 0.675-0.752 --> 0.607  
Char. 51: 0.564 --> 0.335  
Char. 52: 0.437-0.520 --> 0.187  
Char. 53: 0.603-0.670 --> 0.581  
Char. 55: 0.269-0.300 --> 0.000  
Char. 56: 0.225 --> 0.159  
Char. 58: 0.425-0.460 --> 0.149  
Char. 59: 0.314-0.416 --> 0.172  
Char. 61: 0.325-0.329 --> 0.360  
Char. 63: 0.331-0.340 --> 0.360  
Char. 79: 0.427 --> 0.689  
Char. 81: 0.570-0.579 --> 0.396  
Char. 85: 0.487 --> 0.344  
Char. 86: 0.519-0.560 --> 0.402  
Char. 87: 0.555 --> 0.367  
Char. 88: 0.587-0.608 --> 0.439  
Char. 89: 0.465 --> 0.370  
Char. 90: 0.508 --> 0.332  
Char. 91: 0.559 --> 0.299  
Char. 92: 0.540 --> 0.600  
Char. 93: 0.571 --> 0.504  
Char. 94: 0.480 --> 0.523  
Char. 95: 0.475 --> 0.424  
Char. 96: 0.383 --> 0.373  
Char. 105: 0.398 --> 0.394  
Char. 106: 0.510 --> 0.266  
Char. 107: 0.344 --> 0.202  
Char. 108: 0.563 --> 0.403  
Char. 109: 0.478 --> 0.444  
Char. 110: 0.743 --> 0.594  
Char. 111: 0.531-0.623 --> 0.650  
Char. 113: 0.691-0.774 --> 0.593  
Char. 125: 0.264 --> 1.000  
Char. 126: 0.434 --> 0.585

Char. 127: 0.522-0.525 --> 0.427  
Char. 128: 0.550 --> 0.536  
Char. 130: 0.415-0.431 --> 0.397  
Char. 133: 0.437 --> 0.403  
Char. 135: 0.069-0.118 --> 0.058  
Char. 136: 0.303-0.870 --> 0.872  
Char. 322: 0.506-0.549 --> 0.444  
Char. 323: 0.618-0.677 --> 0.528  
Char. 334: 0.257-0.320 --> 0.203  
Char. 335: 0.140-0.257 --> 0.411  
Char. 336: 0.286-0.296 --> 0.208  
Char. 337: 0.303-0.345 --> 0.158  
Char. 338: 0.363-0.366 --> 0.373  
Char. 347: 0.132 --> 0.297  
Char. 348: 0.331 --> 0.849  
Char. 349: 0.448-0.497 --> 0.537  
Char. 353: 0.657 --> 0.749  
Char. 355: 0.377 --> 0.183  
Char. 356: 0.496 --> 0.490  
Char. 357: 0.394 --> 0.594  
Char. 365: 0.572 --> 0.438  
Char. 422: 2 --> 0  
Char. 473: 2 --> 3

Hexian :

Char. 5: 0.571 --> 0.255  
Char. 6: 0.348-0.371 --> 0.085  
Char. 9: 0.584 --> 0.580  
Char. 10: 0.497 --> 0.495  
Char. 12: 0.624-0.751 --> 0.561  
Char. 15: 0.794 --> 0.840  
Char. 16: 0.857 --> 1.000  
Char. 17: 0.798 --> 0.839  
Char. 18: 0.852 --> 0.924  
Char. 20: 0.638 --> 0.780  
Char. 24: 0.667 --> 0.684  
Char. 26: 0.771 --> 1.000  
Char. 27: 0.441-0.442 --> 0.306  
Char. 30: 0.492 --> 0.719  
Char. 31: 0.620 --> 0.978  
Char. 32: 0.199-0.200 --> 0.167  
Char. 33: 0.235 --> 0.132

Char. 34: 0.827 --> 0.946  
Char. 35: 0.627-0.638 --> 0.514  
Char. 36: 0.600 --> 0.591  
Char. 39: 0.584-0.745 --> 0.327  
Char. 40: 0.529 --> 0.423  
Char. 43: 0.278-0.295 --> 0.408  
Char. 44: 0.290 --> 0.330  
Char. 45: 0.568-0.593 --> 0.716  
Char. 46: 0.432-0.563 --> 0.424  
Char. 48: 0.928 --> 0.948  
Char. 50: 0.500-0.510 --> 0.595  
Char. 52: 0.437-0.520 --> 0.384  
Char. 54: 0.760 --> 0.851  
Char. 55: 0.269-0.300 --> 0.101  
Char. 56: 0.242-0.276 --> 0.474  
Char. 57: 0.841 --> 0.784  
Char. 60: 0.791 --> 0.881  
Char. 62: 0.541-0.631 --> 0.260  
Char. 65: 0.608 --> 0.737  
Char. 66: 0.237-0.334 --> 0.654  
Char. 70: 0.442 --> 0.420  
Char. 71: 0.279 --> 0.266  
Char. 72: 0.377 --> 0.384  
Char. 75: 0.397-0.402 --> 0.465  
Char. 82: 0.604-0.699 --> 0.493  
Char. 83: 0.550 --> 0.402  
Char. 85: 0.487-0.537 --> 0.397  
Char. 86: 0.519 --> 0.313  
Char. 87: 0.555-0.613 --> 0.000  
Char. 88: 0.587-0.608 --> 0.000  
Char. 89: 0.465-0.476 --> 0.348  
Char. 91: 0.612 --> 0.756  
Char. 92: 0.496 --> 0.492  
Char. 93: 0.571-0.614 --> 0.619  
Char. 94: 0.465-0.480 --> 0.406  
Char. 98: 0.456-0.523 --> 0.659  
Char. 126: 0.426-0.434 --> 1.000  
Char. 137: 0.657 --> 0.631  
Char. 138: 0.600 --> 0.474  
Char. 214: 0.346 --> 0.678  
Char. 215: 0.227-0.242 --> 0.611



Char. 216: 0.511 --> 0.598  
Char. 217: 0.589 --> 0.759  
Char. 226: 0.595 --> 0.662  
Char. 227: 0.354 --> 0.543  
Char. 230: 0.428 --> 0.285  
Char. 231: 0.100 --> 0.000  
Char. 234: 0.500 --> 1.000  
Char. 236: 0.305-0.341 --> 0.542  
Char. 237: 0.473-0.676 --> 0.704  
Char. 238: 0.380 --> 0.395  
Char. 242: 0.000-0.027 --> 1.000  
Char. 244: 0.500 --> 1.000  
Char. 320: 0.531 --> 0.751  
Char. 321: 0.705-0.722 --> 0.775  
Char. 323: 0.618-0.677 --> 0.287  
Char. 324: 0.652 --> 0.858  
Char. 325: 0.341-0.370 --> 0.000  
Char. 326: 0.380-0.491 --> 0.188  
Char. 331: 0.158 --> 0.029  
Char. 332: 0.269 --> 0.244  
Char. 334: 0.257-0.320 --> 0.127  
Char. 335: 0.128 --> 0.074  
Char. 336: 0.286-0.296 --> 0.213  
Char. 337: 0.303-0.345 --> 0.206  
Char. 338: 0.363-0.366 --> 0.729  
Char. 339: 0.301-0.332 --> 0.438  
Char. 340: 0.394-0.458 --> 0.477  
Char. 346: 0.431 --> 0.405  
Char. 347: 0.071 --> 0.067  
Char. 348: 0.222 --> 0.130  
Char. 370: 0.350 --> 0.278  
Char. 400: 0 --> 1  
Char. 401: 0 --> 1  
Char. 402: 0 --> 1  
Char. 469: 0 --> 3  
Char. 477: 0 --> 1  
Char. 478: 1 --> 0  
Char. 481: 0 --> 1  
Char. 482: 0 --> 1  
Char. 484: 0 --> 1  
Char. 487: 0 --> 1

Char. 497: 1 --> 0  
Char. 502: 2 --> 0  
Char. 505: 1 --> 0  
Char. 523: 1 --> 0  
Char. 603: 0 --> 1  
Char. 605: 2 --> 1

Sambungmacan\_1\_3 :

Char. 0: 0.368-0.413 --> 0.341  
Char. 1: 0.491-0.569 --> 0.445  
Char. 3: 0.608-0.637 --> 0.484  
Char. 4: 0.453-0.547 --> 0.355  
Char. 5: 0.637 --> 0.693  
Char. 6: 0.396 --> 0.604  
Char. 7: 0.560 --> 0.648  
Char. 8: 0.506 --> 0.712  
Char. 9: 0.701 --> 0.718  
Char. 10: 0.593 --> 0.725  
Char. 17: 0.634-0.641 --> 0.627  
Char. 20: 0.867 --> 0.893  
Char. 22: 0.798 --> 0.882  
Char. 24: 0.592-0.597 --> 0.599  
Char. 25: 0.535 --> 0.516  
Char. 27: 0.441-0.442 --> 0.631  
Char. 28: 0.486-0.510 --> 0.418  
Char. 32: 0.452-0.478 --> 0.303  
Char. 33: 0.402-0.420 --> 0.331  
Char. 34: 0.614-0.671 --> 0.611  
Char. 44: 0.290 --> 0.398  
Char. 45: 0.568-0.593 --> 0.621  
Char. 46: 0.625 --> 0.851  
Char. 47: 0.513-0.644 --> 0.363  
Char. 48: 0.567-0.599 --> 0.473  
Char. 59: 0.445-0.520 --> 0.526  
Char. 62: 0.541-0.619 --> 0.373  
Char. 65: 0.524-0.559 --> 0.630  
Char. 66: 0.237-0.360 --> 0.421  
Char. 67: 0.269 --> 0.257  
Char. 68: 0.609-0.640 --> 0.587  
Char. 71: 0.474-0.482 --> 0.358  
Char. 72: 0.317 --> 0.263  
Char. 74: 0.477-0.558 --> 0.194

Char. 76: 0.422 --> 0.000  
Char. 77: 0.579-0.608 --> 0.553  
Char. 79: 0.617-0.638 --> 0.709  
Char. 80: 0.659-0.711 --> 0.407  
Char. 86: 0.597-0.606 --> 0.625  
Char. 91: 0.559-0.612 --> 0.481  
Char. 137: 0.552 --> 0.435  
Char. 320: 0.480-0.484 --> 0.589  
Char. 323: 0.618 --> 0.506  
Char. 324: 0.549-0.601 --> 0.545  
Char. 325: 0.341-0.370 --> 0.442  
Char. 331: 0.253-0.302 --> 0.239  
Char. 335: 0.184-0.257 --> 0.612  
Char. 342: 0.217 --> 0.000  
Char. 346: 0.476 --> 0.420  
Char. 369: 0.432 --> 0.406  
Char. 370: 0.364 --> 0.210  
Char. 464: 1 --> 2  
Char. 469: 0 --> 3  
Char. 473: 2 --> 1  
Char. 486: 1 --> 0  
Char. 500: 0 --> 1  
Char. 502: 2 --> 01  
Char. 514: 1 --> 0

Sangiran\_2\_17 :

Char. 0: 0.368-0.378 --> 0.284  
Char. 1: 0.572 --> 0.766  
Char. 2: 0.639-0.652 --> 0.903  
Char. 3: 0.637 --> 0.828  
Char. 4: 0.383-0.547 --> 0.612  
Char. 5: 0.571 --> 0.750  
Char. 6: 0.348-0.371 --> 0.417  
Char. 7: 0.484 --> 0.566  
Char. 8: 0.456 --> 0.457  
Char. 9: 0.584 --> 0.670  
Char. 22: 0.675 --> 0.759  
Char. 27: 0.441-0.442 --> 0.638  
Char. 28: 0.349-0.510 --> 0.588  
Char. 30: 0.492 --> 0.370  
Char. 37: 0.613 --> 0.626  
Char. 39: 0.584-0.745 --> 0.776

Char. 41: 0.257 --> 0.234  
Char. 42: 0.394 --> 0.341  
Char. 43: 0.278-0.295 --> 0.213  
Char. 44: 0.290 --> 0.161  
Char. 45: 0.568-0.593 --> 0.504  
Char. 46: 0.432-0.563 --> 0.760  
Char. 47: 0.735 --> 0.887  
Char. 49: 0.752 --> 0.753  
Char. 50: 0.500-0.510 --> 0.362  
Char. 51: 0.617 --> 0.824  
Char. 52: 0.437-0.520 --> 0.685  
Char. 53: 0.603-0.670 --> 0.797  
Char. 55: 0.269-0.300 --> 0.624  
Char. 58: 0.425-0.460 --> 0.464  
Char. 61: 0.325-0.329 --> 0.000  
Char. 62: 0.541-0.631 --> 0.876  
Char. 63: 0.331-0.340 --> 0.000  
Char. 64: 0.594 --> 0.735  
Char. 66: 0.237-0.334 --> 0.224  
Char. 67: 0.538 --> 0.567  
Char. 68: 0.649 --> 0.918  
Char. 69: 0.473 --> 0.626  
Char. 70: 0.442 --> 0.518  
Char. 74: 0.509 --> 0.471  
Char. 77: 0.579-0.608 --> 0.719  
Char. 79: 0.343 --> 0.281  
Char. 80: 0.659 --> 0.552  
Char. 81: 0.570-0.579 --> 1.000  
Char. 82: 0.604-0.699 --> 0.736  
Char. 83: 0.550 --> 0.665  
Char. 87: 0.555-0.613 --> 0.804  
Char. 88: 0.587-0.608 --> 0.851  
Char. 93: 0.571-0.614 --> 0.568  
Char. 94: 0.465-0.480 --> 0.571  
Char. 126: 0.426-0.434 --> 0.206  
Char. 138: 0.600 --> 0.608  
Char. 214: 0.346 --> 0.257  
Char. 215: 0.227-0.242 --> 0.196  
Char. 217: 0.589 --> 0.122  
Char. 226: 0.595 --> 0.533  
Char. 228: 0.446-0.458 --> 0.482

Char. 229: 0.666 --> 0.333  
Char. 235: 0.474-0.525 --> 0.453  
Char. 236: 0.305-0.341 --> 0.280  
Char. 237: 0.473-0.676 --> 0.385  
Char. 239: 0.300 --> 0.200  
Char. 240: 0.583 --> 0.500  
Char. 241: 0.266-0.300 --> 0.100  
Char. 321: 0.705-0.722 --> 0.564  
Char. 330: 0.485 --> 0.362  
Char. 334: 0.257-0.320 --> 0.420  
Char. 336: 0.286-0.296 --> 0.434  
Char. 337: 0.303-0.345 --> 0.505  
Char. 338: 0.363-0.366 --> 0.203  
Char. 339: 0.301-0.332 --> 0.000  
Char. 340: 0.394-0.458 --> 0.302  
Char. 341: 0.550 --> 0.578  
Char. 345: 0.428 --> 0.393  
Char. 369: 0.554 --> 0.479  
Char. 422: 2 --> 1  
Char. 424: 1 --> 0  
Char. 486: 1 --> 0  
Char. 494: 1 --> 0  
Char. 511: 0 --> 1  
Char. 513: 0 --> 1

Ngandong7\_9\_12 :

Char. 1: 0.491-0.569 --> 0.645  
Char. 3: 0.608-0.637 --> 0.696  
Char. 4: 0.453-0.547 --> 0.552  
Char. 15: 0.606 --> 0.619  
Char. 16: 0.657-0.713 --> 0.726  
Char. 18: 0.622-0.638 --> 0.647  
Char. 23: 0.856 --> 0.911  
Char. 24: 0.592-0.597 --> 0.577  
Char. 26: 0.550 --> 0.615  
Char. 27: 0.441-0.442 --> 0.319  
Char. 30: 0.490-0.492 --> 0.828  
Char. 31: 0.555-0.595 --> 0.894  
Char. 32: 0.452-0.478 --> 0.583  
Char. 33: 0.402-0.420 --> 0.449  
Char. 34: 0.614-0.671 --> 0.700  
Char. 35: 0.627-0.638 --> 0.760

Char. 36: 0.600 --> 0.752  
Char. 37: 0.526 --> 0.405  
Char. 44: 0.290 --> 0.270  
Char. 45: 0.568-0.593 --> 0.561  
Char. 47: 0.513-0.644 --> 0.761  
Char. 49: 0.675-0.732 --> 0.856  
Char. 50: 0.500-0.557 --> 0.407  
Char. 52: 0.469-0.520 --> 0.756  
Char. 53: 0.670 --> 0.848  
Char. 62: 0.541-0.619 --> 0.730  
Char. 65: 0.524-0.559 --> 0.514  
Char. 66: 0.237-0.360 --> 0.219  
Char. 68: 0.609-0.640 --> 0.781  
Char. 69: 0.492 --> 0.639  
Char. 71: 0.474-0.482 --> 0.508  
Char. 73: 0.488 --> 0.903  
Char. 74: 0.477-0.558 --> 0.805  
Char. 75: 0.621 --> 0.871  
Char. 77: 0.579-0.608 --> 0.815  
Char. 82: 0.699 --> 0.805  
Char. 86: 0.597-0.606 --> 0.522  
Char. 89: 0.577-0.596 --> 0.642  
Char. 91: 0.559-0.612 --> 0.632  
Char. 92: 0.503-0.534 --> 0.926  
Char. 98: 0.531 --> 0.712  
Char. 138: 0.508-0.600 --> 0.809  
Char. 320: 0.480-0.484 --> 0.433  
Char. 324: 0.549-0.601 --> 0.661  
Char. 325: 0.341-0.370 --> 0.127  
Char. 326: 0.380-0.479 --> 0.139  
Char. 330: 0.593-0.596 --> 0.673  
Char. 332: 0.365-0.382 --> 0.432  
Char. 337: 0.303-0.345 --> 0.508  
Char. 340: 0.394-0.458 --> 0.353  
Char. 341: 0.242 --> 0.187  
Char. 345: 0.668-0.732 --> 0.587  
Char. 348: 0.374 --> 0.645  
Char. 406: 1 --> 2  
Char. 482: 0 --> 1  
Char. 491: 1 --> 2  
Char. 496: 1 --> 2

Char. 510: 1 --> 0  
Char. 517: 1 --> 0  
Char. 521: 1 --> 0

Dmanisi :

Char. 1: 0.249-0.418 --> 0.628  
Char. 2: 0.174-0.411 --> 0.660  
Char. 3: 0.402-0.528 --> 0.705  
Char. 4: 0.569 --> 0.618  
Char. 9: 0.719 --> 0.878  
Char. 11: 0.515-0.569 --> 0.758  
Char. 12: 0.403-0.578 --> 0.773  
Char. 14: 0.282-0.413 --> 0.663  
Char. 16: 0.584-0.627 --> 0.676  
Char. 18: 0.466-0.551 --> 0.650  
Char. 24: 0.627 --> 0.703  
Char. 25: 0.641 --> 0.699  
Char. 28: 0.486-0.510 --> 0.673  
Char. 30: 0.516-0.521 --> 0.851  
Char. 31: 0.610 --> 0.802  
Char. 33: 0.312-0.402 --> 0.439  
Char. 36: 0.358 --> 0.319  
Char. 37: 0.574 --> 0.701  
Char. 41: 0.382 --> 0.272  
Char. 42: 0.425-0.507 --> 0.277  
Char. 43: 0.295-0.390 --> 0.198  
Char. 48: 0.480 --> 0.436  
Char. 49: 0.528 --> 0.561  
Char. 55: 0.300-0.305 --> 0.383  
Char. 56: 0.259-0.395 --> 0.118  
Char. 57: 0.522-0.635 --> 0.727  
Char. 60: 0.615-0.669 --> 0.807  
Char. 62: 0.540 --> 0.556  
Char. 64: 0.601 --> 0.826  
Char. 69: 0.568-0.594 --> 0.440  
Char. 73: 0.313 --> 0.378  
Char. 74: 0.616-0.788 --> 0.607  
Char. 76: 0.543 --> 0.819  
Char. 78: 0.553-0.720 --> 0.828  
Char. 82: 0.492-0.649 --> 0.690  
Char. 84: 0.556 --> 0.719  
Char. 85: 0.546-0.570 --> 0.692

Char. 86: 0.597 --> 0.705  
Char. 87: 0.196-0.450 --> 0.615  
Char. 88: 0.190-0.492 --> 0.627  
Char. 89: 0.530-0.537 --> 0.659  
Char. 91: 0.235-0.411 --> 0.433  
Char. 92: 0.242-0.394 --> 0.405  
Char. 93: 0.574 --> 0.586  
Char. 96: 0.682 --> 0.760  
Char. 99: 0.764 --> 0.814  
Char. 102: 0.111 --> 0.089  
Char. 103: 0.562 --> 0.680  
Char. 105: 0.481 --> 0.736  
Char. 106: 0.552-0.576 --> 0.675  
Char. 107: 0.453-0.462 --> 0.476  
Char. 111: 0.623 --> 0.721  
Char. 113: 0.693-0.774 --> 0.847  
Char. 114: 0.736 --> 0.771  
Char. 116: 0.648 --> 0.723  
Char. 117: 0.690 --> 0.734  
Char. 118: 0.622 --> 0.814  
Char. 119: 0.780 --> 0.878  
Char. 121: 0.750 --> 0.761  
Char. 122: 0.447-0.465 --> 0.348  
Char. 123: 0.818 --> 0.789  
Char. 124: 0.640 --> 0.875  
Char. 125: 0.066-0.067 --> 0.034  
Char. 126: 0.495-0.846 --> 0.420  
Char. 131: 0.673 --> 0.822  
Char. 133: 0.488-0.665 --> 0.671  
Char. 134: 0.560 --> 0.619  
Char. 135: 0.560 --> 0.790  
Char. 138: 0.600-0.699 --> 0.702  
Char. 214: 0.673-0.807 --> 1.000  
Char. 215: 0.775 --> 1.000  
Char. 217: 0.706 --> 0.911  
Char. 222: 0.513 --> 0.485  
Char. 224: 0.250 --> 1.000  
Char. 227: 0.733 --> 0.769  
Char. 229: 0.888 --> 0.925  
Char. 234: 0.500 --> 0.333  
Char. 237: 0.473 --> 0.262

Char. 240: 0.666 --> 0.916  
Char. 242: 0.000 --> 0.166  
Char. 245: 0.694 --> 1.000  
Char. 246: 0.887 --> 1.000  
Char. 247: 0.107-0.348 --> 0.049  
Char. 248: 0.878 --> 1.000  
Char. 249: 0.600-0.650 --> 1.000  
Char. 327: 0.612-0.654 --> 0.532  
Char. 328: 0.158-0.187 --> 0.141  
Char. 330: 0.576 --> 0.810  
Char. 332: 0.294-0.307 --> 0.195  
Char. 338: 0.461 --> 0.470  
Char. 342: 0.276-0.305 --> 0.413  
Char. 343: 0.208-0.299 --> 0.387  
Char. 348: 0.364 --> 0.319  
Char. 352: 0.565 --> 0.679  
Char. 354: 0.618 --> 0.825  
Char. 358: 0.265 --> 0.267  
Char. 363: 0.458-0.633 --> 0.333  
Char. 364: 0.386-0.392 --> 0.341  
Char. 366: 0.413 --> 0.490  
Char. 367: 0.697 --> 0.662  
Char. 368: 0.593-0.695 --> 0.822  
Char. 370: 0.558 --> 0.638  
Char. 439: 0 --> 1  
Char. 457: 1 --> 2  
Char. 484: 0 --> 1  
Char. 500: 0 --> 1  
Char. 513: 0 --> 1

Rabat :

Char. 102: 0.459 --> 0.438  
Char. 122: 0.329-0.373 --> 0.464  
Char. 197: 0.250-0.500 --> 1.000  
Char. 200: 0.413-0.444 --> 0.958  
Char. 202: 0.750 --> 0.125  
Char. 203: 0.500-0.625 --> 0.250  
Char. 209: 0.554 --> 0.738  
Char. 210: 0.200 --> 1.000  
Char. 213: 0.031 --> 0.750  
Char. 216: 0.406-0.466 --> 0.522  
Char. 217: 0.613 --> 0.678

Char. 218: 0.100 --> 0.400  
Char. 219: 0.300-0.600 --> 0.800  
Char. 222: 0.525 --> 0.814  
Char. 223: 0.242-0.324 --> 0.226  
Char. 224: 0.250 --> 1.000  
Char. 228: 0.270-0.330 --> 0.366  
Char. 229: 0.444 --> 0.777  
Char. 230: 0.571 --> 0.428  
Char. 231: 0.300-0.400 --> 1.000  
Char. 232: 0.153 --> 0.307  
Char. 233: 0.000 --> 0.666  
Char. 237: 0.533-0.545 --> 0.447  
Char. 238: 0.227-0.274 --> 0.097  
Char. 242: 0.166 --> 0.333  
Char. 243: 0.000 --> 1.000  
Char. 284: 0.500-0.875 --> 1.000  
Char. 303: 0.000 --> 0.500  
Char. 361: 0.241-0.256 --> 1.000  
Char. 362: 0.337-0.404 --> 0.636  
Char. 363: 0.458-0.469 --> 0.487  
Char. 395: 0.560-0.570 --> 0.497  
Char. 544: 2 --> 0  
Char. 545: 1 --> 0  
Char. 546: 1 --> 0  
Char. 591: 2 --> 1  
Char. 616: 2 --> 0  
Char. 625: 0 --> 1  
Char. 626: 1 --> 2  
Char. 632: 0 --> 1  
Char. 633: 1 --> 2

STW53 :

Char. 0: 0.047-0.067 --> 0.018  
Char. 2: 0.174-0.411 --> 0.088  
Char. 5: 0.571 --> 0.187  
Char. 6: 0.348 --> 0.250  
Char. 7: 0.678 --> 0.787  
Char. 8: 0.647 --> 1.000  
Char. 10: 0.802 --> 0.852  
Char. 13: 0.547-0.575 --> 0.795  
Char. 14: 0.282-0.413 --> 0.264  
Char. 15: 0.684 --> 0.784

Char. 17: 0.715 --> 0.789  
Char. 19: 0.246 --> 0.007  
Char. 20: 0.335 --> 0.000  
Char. 22: 0.485 --> 0.000  
Char. 26: 0.454 --> 0.433  
Char. 28: 0.486-0.510 --> 0.407  
Char. 29: 0.578 --> 0.810  
Char. 30: 0.516-0.521 --> 0.262  
Char. 31: 0.610 --> 0.475  
Char. 32: 0.478-0.521 --> 0.446  
Char. 33: 0.312-0.402 --> 0.217  
Char. 34: 0.811 --> 0.944  
Char. 35: 0.377-0.433 --> 0.664  
Char. 36: 0.358 --> 0.671  
Char. 38: 0.625 --> 0.746  
Char. 39: 0.584 --> 0.201  
Char. 40: 0.506 --> 0.465  
Char. 42: 0.425-0.507 --> 0.596  
Char. 43: 0.295-0.390 --> 0.701  
Char. 44: 0.121-0.173 --> 0.441  
Char. 45: 0.650 --> 0.916  
Char. 47: 0.299 --> 0.099  
Char. 50: 0.526 --> 0.893  
Char. 51: 0.545-0.580 --> 0.454  
Char. 52: 0.365 --> 0.133  
Char. 53: 0.513-0.621 --> 0.252  
Char. 54: 0.519 --> 0.483  
Char. 55: 0.300-0.305 --> 0.084  
Char. 58: 0.302-0.404 --> 0.759  
Char. 59: 0.288-0.381 --> 0.632  
Char. 60: 0.615-0.669 --> 0.370  
Char. 61: 0.472 --> 0.945  
Char. 62: 0.540 --> 0.074  
Char. 63: 0.479 --> 0.945  
Char. 67: 0.521 --> 1.000  
Char. 68: 0.653 --> 0.905  
Char. 69: 0.568-0.594 --> 1.000  
Char. 74: 0.616-0.788 --> 0.836  
Char. 78: 0.553-0.720 --> 0.526  
Char. 79: 0.517 --> 0.576  
Char. 80: 0.643-0.687 --> 0.467

Char. 81: 0.417 --> 0.021  
Char. 82: 0.492-0.649 --> 0.274  
Char. 85: 0.546-0.570 --> 0.354  
Char. 86: 0.597 --> 0.537  
Char. 87: 0.196-0.450 --> 0.177  
Char. 88: 0.190-0.492 --> 0.179  
Char. 89: 0.530-0.537 --> 0.439  
Char. 91: 0.235-0.411 --> 0.160  
Char. 92: 0.242-0.394 --> 0.202  
Char. 94: 0.674 --> 0.708  
Char. 95: 0.688 --> 0.825  
Char. 97: 0.674 --> 1.000  
Char. 100: 0.581 --> 0.602  
Char. 104: 0.408-0.552 --> 0.590  
Char. 106: 0.552-0.576 --> 0.357  
Char. 107: 0.453-0.462 --> 0.295  
Char. 110: 0.852 --> 0.926  
Char. 111: 0.623 --> 0.458  
Char. 115: 0.779 --> 0.838  
Char. 118: 0.622 --> 0.552  
Char. 120: 0.877 --> 0.953  
Char. 122: 0.447-0.465 --> 0.608  
Char. 125: 0.066-0.067 --> 0.101  
Char. 127: 0.330-0.383 --> 0.231  
Char. 128: 0.513 --> 0.462  
Char. 129: 0.447-0.488 --> 0.496  
Char. 130: 0.348-0.364 --> 0.278  
Char. 133: 0.488-0.665 --> 0.275  
Char. 137: 0.787 --> 0.801  
Char. 138: 0.600-0.699 --> 0.460  
Char. 216: 0.742 --> 0.884  
Char. 220: 0.846 --> 0.948  
Char. 221: 0.771 --> 0.881  
Char. 223: 0.509 --> 1.000  
Char. 224: 0.250 --> 0.000  
Char. 225: 0.750 --> 0.000  
Char. 228: 0.320 --> 0.646  
Char. 234: 0.500 --> 1.000  
Char. 235: 0.627-0.833 --> 0.917  
Char. 236: 0.656-0.724 --> 0.853  
Char. 237: 0.473 --> 0.527

Char. 238: 0.486 --> 1.000  
Char. 239: 0.766 --> 0.800  
Char. 244: 0.166-0.500 --> 1.000  
Char. 247: 0.107-0.348 --> 0.430  
Char. 250: 0.833 --> 0.916  
Char. 254: 0.000-0.500 --> 1.000  
Char. 320: 0.522-0.523 --> 1.000  
Char. 321: 0.081-0.327 --> 0.058  
Char. 323: 0.801 --> 1.000  
Char. 324: 0.390 --> 0.304  
Char. 328: 0.158-0.187 --> 0.295  
Char. 329: 0.324 --> 0.749  
Char. 330: 0.576 --> 0.324  
Char. 334: 0.244 --> 0.000  
Char. 336: 0.227 --> 0.069  
Char. 337: 0.224 --> 0.004  
Char. 339: 0.440 --> 0.977  
Char. 341: 0.700 --> 1.000  
Char. 344: 0.785 --> 0.822  
Char. 345: 0.721 --> 0.608  
Char. 346: 0.812 --> 0.948  
Char. 347: 0.215-0.246 --> 0.577  
Char. 348: 0.364 --> 0.457  
Char. 349: 0.550 --> 1.000  
Char. 350: 0.765 --> 0.923  
Char. 351: 0.695 --> 0.804  
Char. 355: 0.379-0.395 --> 0.237  
Char. 357: 0.446 --> 0.327  
Char. 358: 0.265 --> 0.176  
Char. 359: 0.805 --> 1.000  
Char. 362: 0.424-0.510 --> 0.868  
Char. 363: 0.458-0.633 --> 0.913  
Char. 364: 0.386-0.392 --> 0.592  
Char. 365: 0.128 --> 0.003  
Char. 369: 0.690 --> 0.936  
Char. 421: 0 --> 1  
Char. 480: 0 --> 1  
Char. 481: 0 --> 1  
Char. 488: 2 --> 0  
Char. 490: 0 --> 1  
Char. 498: 1 --> 0

Char. 499: 1 --> 0  
Char. 502: 1 --> 2  
Char. 516: 2 --> 1  
Char. 608: 0 --> 2  
Char. 609: 12 --> 0

OH\_9 :

Char. 1: 0.491-0.569 --> 1.000  
Char. 2: 0.639-0.652 --> 1.000  
Char. 3: 0.608-0.637 --> 1.000  
Char. 4: 0.547 --> 0.864  
Char. 5: 0.571 --> 1.000  
Char. 6: 0.348-0.371 --> 0.474  
Char. 7: 0.471-0.484 --> 0.527  
Char. 8: 0.435-0.442 --> 0.312  
Char. 9: 0.584 --> 0.707  
Char. 10: 0.497-0.503 --> 0.419  
Char. 11: 0.620 --> 1.000  
Char. 12: 0.624-0.751 --> 1.000  
Char. 13: 0.677 --> 1.000  
Char. 15: 0.584-0.606 --> 0.706  
Char. 17: 0.634-0.641 --> 0.664  
Char. 19: 0.304-0.356 --> 0.287  
Char. 22: 0.642-0.675 --> 0.954  
Char. 26: 0.547-0.550 --> 0.514  
Char. 27: 0.441-0.442 --> 0.371  
Char. 30: 0.516-0.521 --> 0.523  
Char. 33: 0.402-0.420 --> 0.424  
Char. 34: 0.671 --> 0.888  
Char. 37: 0.558-0.591 --> 0.622  
Char. 39: 0.584-0.745 --> 1.000  
Char. 40: 0.580-0.600 --> 1.000  
Char. 41: 0.496 --> 0.762  
Char. 42: 0.425-0.507 --> 0.616  
Char. 43: 0.295-0.390 --> 0.414  
Char. 44: 0.121-0.173 --> 0.034  
Char. 45: 0.568-0.593 --> 0.653  
Char. 46: 0.479-0.563 --> 0.576  
Char. 47: 0.513 --> 0.450  
Char. 48: 0.682 --> 0.751  
Char. 50: 0.471 --> 0.354  
Char. 51: 0.545-0.580 --> 0.201

Char. 52: 0.437-0.454 --> 0.278  
Char. 53: 0.513-0.634 --> 0.483  
Char. 54: 0.598 --> 0.500  
Char. 55: 0.269-0.300 --> 0.205  
Char. 57: 0.841-0.929 --> 1.000  
Char. 58: 0.302-0.404 --> 0.200  
Char. 59: 0.288-0.381 --> 0.136  
Char. 60: 0.615-0.669 --> 0.535  
Char. 61: 0.325-0.329 --> 0.254  
Char. 63: 0.331-0.340 --> 0.312  
Char. 64: 0.575 --> 0.966  
Char. 65: 0.524-0.559 --> 0.279  
Char. 68: 0.640 --> 0.880  
Char. 72: 0.317-0.328 --> 0.303  
Char. 73: 0.272-0.289 --> 0.429  
Char. 76: 0.496 --> 1.000  
Char. 78: 0.553-0.720 --> 0.745  
Char. 79: 0.370-0.397 --> 0.000  
Char. 81: 0.475 --> 0.422  
Char. 85: 0.570-0.580 --> 0.944  
Char. 86: 0.597-0.606 --> 1.000  
Char. 87: 0.555-0.613 --> 0.715  
Char. 88: 0.587-0.608 --> 0.629  
Char. 89: 0.537-0.596 --> 0.950  
Char. 90: 0.559-0.605 --> 1.000  
Char. 91: 0.559-0.612 --> 1.000  
Char. 92: 0.503-0.534 --> 0.792  
Char. 93: 0.571-0.614 --> 1.000  
Char. 94: 0.465-0.480 --> 0.609  
Char. 98: 0.463-0.523 --> 0.843  
Char. 106: 0.576-0.815 --> 0.919  
Char. 108: 0.667-0.677 --> 0.773  
Char. 109: 0.567-0.661 --> 0.716  
Char. 112: 0.588-0.623 --> 0.876  
Char. 138: 0.600-0.699 --> 0.970  
Char. 320: 0.480-0.484 --> 0.254  
Char. 322: 0.464 --> 0.396  
Char. 324: 0.549-0.601 --> 0.479  
Char. 325: 0.341 --> 0.136  
Char. 326: 0.359-0.407 --> 0.114  
Char. 332: 0.294-0.307 --> 0.291

Char. 334: 0.257-0.320 --> 0.369  
Char. 335: 0.184-0.275 --> 0.375  
Char. 336: 0.286-0.296 --> 0.117  
Char. 337: 0.303-0.345 --> 0.174  
Char. 338: 0.363-0.366 --> 0.238  
Char. 339: 0.301-0.332 --> 0.265  
Char. 340: 0.394-0.458 --> 0.000  
Char. 342: 0.276-0.305 --> 0.485  
Char. 343: 0.208-0.299 --> 0.330  
Char. 347: 0.122 --> 0.072  
Char. 348: 0.317-0.331 --> 0.210  
Char. 369: 0.554-0.580 --> 0.404  
Char. 513: 0 --> 1  
Char. 516: 2 --> 0

Turkana\_ER3733\_3883 :

Char. 5: 0.571 --> 0.311  
Char. 6: 0.348-0.371 --> 0.244  
Char. 7: 0.440-0.484 --> 0.400  
Char. 28: 0.486-0.510 --> 0.527  
Char. 31: 0.610 --> 0.657  
Char. 36: 0.358 --> 0.341  
Char. 37: 0.484-0.574 --> 0.454  
Char. 38: 0.461-0.488 --> 0.209  
Char. 39: 0.584-0.736 --> 0.346  
Char. 42: 0.425-0.507 --> 0.285  
Char. 43: 0.295-0.390 --> 0.270  
Char. 46: 0.479-0.563 --> 0.298  
Char. 62: 0.540 --> 0.442  
Char. 65: 0.524-0.570 --> 0.720  
Char. 71: 0.474-0.553 --> 0.307  
Char. 75: 0.397-0.402 --> 0.451  
Char. 80: 0.643-0.687 --> 0.259  
Char. 86: 0.597 --> 0.584  
Char. 90: 0.549-0.605 --> 0.547  
Char. 94: 0.417-0.480 --> 0.414  
Char. 96: 0.414-0.467 --> 0.385  
Char. 97: 0.324-0.445 --> 0.319  
Char. 101: 0.506-0.592 --> 0.631  
Char. 105: 0.475-0.481 --> 0.546  
Char. 108: 0.616-0.664 --> 0.389  
Char. 109: 0.518-0.572 --> 0.438



Char. 110: 0.773-0.852 --> 0.899  
Char. 111: 0.623 --> 0.739  
Char. 113: 0.693-0.774 --> 0.817  
Char. 114: 0.516-0.680 --> 0.392  
Char. 115: 0.477-0.501 --> 0.463  
Char. 118: 0.622 --> 0.711  
Char. 121: 0.403-0.572 --> 0.280  
Char. 122: 0.447-0.462 --> 0.116  
Char. 123: 0.818-0.827 --> 0.710  
Char. 128: 0.550-0.562 --> 0.608  
Char. 131: 0.309-0.357 --> 0.236  
Char. 133: 0.488-0.541 --> 0.406  
Char. 134: 0.339-0.475 --> 0.247  
Char. 138: 0.600-0.699 --> 0.427  
Char. 141: 0.564-0.633 --> 0.559  
Char. 145: 0.341-0.407 --> 0.613  
Char. 147: 0.377 --> 0.774  
Char. 148: 0.352 --> 0.273  
Char. 149: 0.564-0.576 --> 0.461  
Char. 156: 0.508-0.781 --> 0.456  
Char. 157: 0.548-0.588 --> 0.461  
Char. 158: 0.527-0.659 --> 0.502  
Char. 159: 0.530 --> 0.185  
Char. 161: 0.371-0.424 --> 0.069  
Char. 167: 0.541 --> 0.023  
Char. 175: 0.752-0.760 --> 0.890  
Char. 181: 0.615-0.736 --> 0.763  
Char. 186: 0.667-0.670 --> 0.935  
Char. 190: 0.493-0.494 --> 1.000  
Char. 191: 0.631-0.829 --> 0.917  
Char. 193: 0.291-0.417 --> 1.000  
Char. 197: 0.500 --> 1.000  
Char. 198: 0.505-0.791 --> 0.938  
Char. 199: 0.464-0.538 --> 1.000  
Char. 202: 0.500 --> 0.250  
Char. 216: 0.466-0.511 --> 0.431  
Char. 217: 0.589-0.706 --> 0.756  
Char. 219: 0.600 --> 0.700  
Char. 222: 0.513-0.522 --> 0.305  
Char. 223: 0.381-0.509 --> 0.526  
Char. 224: 0.250 --> 0.375

Char. 225: 0.750 --> 0.875  
Char. 226: 0.595 --> 0.343  
Char. 227: 0.348-0.354 --> 0.253  
Char. 228: 0.119-0.320 --> 0.107  
Char. 231: 0.300-0.500 --> 0.800  
Char. 234: 0.500 --> 1.000  
Char. 236: 0.305-0.341 --> 0.247  
Char. 237: 0.473 --> 0.290  
Char. 240: 0.666 --> 0.708  
Char. 263: 0.473-0.939 --> 1.000  
Char. 264: 0.189-0.308 --> 0.540  
Char. 269: 0.610-0.626 --> 0.714  
Char. 274: 0.616-0.625 --> 0.766  
Char. 278: 0.123-0.159 --> 0.000  
Char. 279: 0.838-0.989 --> 1.000  
Char. 294: 0.333-0.666 --> 1.000  
Char. 297: 0.333 --> 0.666  
Char. 323: 0.618-0.709 --> 0.378  
Char. 330: 0.576 --> 0.489  
Char. 335: 0.184-0.275 --> 0.183  
Char. 346: 0.627-0.659 --> 0.579  
Char. 348: 0.364 --> 0.377  
Char. 350: 0.673-0.765 --> 0.860  
Char. 351: 0.514-0.695 --> 0.763  
Char. 354: 0.536-0.618 --> 0.683  
Char. 356: 0.549-0.554 --> 0.766  
Char. 358: 0.265 --> 0.260  
Char. 359: 0.634-0.678 --> 0.454  
Char. 360: 0.566-0.591 --> 0.490  
Char. 362: 0.381-0.416 --> 0.304  
Char. 363: 0.458-0.469 --> 0.174  
Char. 364: 0.386-0.388 --> 0.115  
Char. 366: 0.265-0.346 --> 0.209  
Char. 367: 0.910-0.931 --> 0.939  
Char. 370: 0.477 --> 0.463  
Char. 372: 0.414-0.655 --> 0.393  
Char. 375: 0.226-0.263 --> 0.517  
Char. 376: 0.380-0.400 --> 0.636  
Char. 377: 0.223-0.255 --> 0.385  
Char. 379: 0.845 --> 0.762  
Char. 380: 0.362 --> 0.000

Char. 382: 0.221 --> 0.021  
Char. 383: 0.578-0.652 --> 0.689  
Char. 384: 0.226 --> 0.049  
Char. 391: 0.235-0.446 --> 0.220  
Char. 392: 0.210-0.451 --> 0.738  
Char. 397: 0.254-0.265 --> 0.389  
Char. 398: 0.167-0.266 --> 0.431  
Char. 399: 0.343-0.416 --> 0.283  
Char. 446: 0 --> 1  
Char. 468: 0 --> 1  
Char. 482: 0 --> 1  
Char. 499: 1 --> 0  
Char. 531: 0 --> 1  
Char. 554: 2 --> 01  
Char. 557: 1 --> 0  
Char. 584: 0 --> 1  
Char. 590: 0 --> 1  
Char. 602: 0 --> 1  
Char. 620: 0 --> 2  
Node 56 :  
Char. 85: 0.462 --> 0.441  
Char. 106: 0.439-0.468 --> 0.556  
Char. 205: 0.000-0.250 --> 0.750  
Char. 208: 0.648-0.684 --> 0.938  
Char. 209: 0.345 --> 0.554  
Char. 213: 0.000 --> 0.031  
Char. 217: 0.336-0.424 --> 0.613  
Char. 222: 0.398-0.452 --> 0.525  
Char. 224: 0.000 --> 0.250  
Char. 242: 0.000 --> 0.166  
Char. 280: 0.222-0.333 --> 1.000  
Char. 285: 0.000 --> 0.333  
Char. 288: 0.066-0.200 --> 0.000  
Char. 333: 0.232-0.283 --> 0.108  
Char. 394: 0.376-0.395 --> 0.523  
Char. 427: 0 --> 1  
Char. 608: 0 --> 1  
Char. 619: 1 --> 0  
Char. 631: 1 --> 0  
Node 57 :  
Char. 6: 0.356-0.424 --> 0.457

Char. 19: 0.492 --> 0.460-0.489  
Char. 26: 0.417-0.456 --> 0.457  
Char. 54: 0.373 --> 0.372  
Char. 55: 0.364-0.401 --> 0.557  
Char. 66: 0.338-0.581 --> 0.590  
Char. 71: 0.495-0.502 --> 0.619  
Char. 73: 0.326-0.355 --> 0.377  
Char. 76: 0.376-0.420 --> 0.314-0.340  
Char. 86: 0.512 --> 0.653-0.654  
Char. 109: 0.400 --> 0.517-0.654  
Char. 123: 0.840-0.855 --> 0.787-0.802  
Char. 127: 0.507-0.642 --> 0.645  
Char. 129: 0.315-0.337 --> 0.237  
Char. 130: 0.446 --> 0.597  
Char. 132: 0.544 --> 0.492-0.537  
Char. 135: 0.292-0.307 --> 0.171-0.248  
Char. 136: 0.243 --> 0.180  
Char. 141: 0.128-0.374 --> 0.091  
Char. 152: 0.365-0.567 --> 0.144  
Char. 153: 0.412-0.548 --> 0.179  
Char. 157: 0.548-0.549 --> 0.050-0.441  
Char. 159: 0.582-0.616 --> 0.527  
Char. 160: 0.715-0.794 --> 0.317-0.532  
Char. 161: 0.658-0.674 --> 0.218-0.357  
Char. 164: 0.428-0.479 --> 0.238  
Char. 187: 0.483-0.541 --> 0.312-0.369  
Char. 214: 0.209-0.323 --> 0.350-0.351  
Char. 219: 0.000 --> 0.300-0.600  
Char. 220: 0.232 --> 0.310  
Char. 232: 0.000 --> 0.076-0.153  
Char. 249: 0.200 --> 0.100  
Char. 268: 0.721-0.745 --> 0.812  
Char. 295: 0.222 --> 0.111  
Char. 296: 0.000 --> 0.800  
Char. 301: 0.505-0.658 --> 0.355  
Char. 305: 0.000-0.333 --> 0.666  
Char. 322: 0.850-0.892 --> 0.825-0.829  
Char. 328: 0.221-0.317 --> 0.216  
Char. 331: 0.312-0.558 --> 0.257-0.310  
Char. 341: 0.252-0.255 --> 0.385  
Char. 342: 0.437 --> 0.324-0.400

Char. 349: 0.259-0.306 --> 0.170  
Char. 351: 0.398-0.495 --> 0.166-0.197  
Char. 366: 0.354 --> 0.313  
Char. 368: 0.490 --> 0.245-0.327  
Char. 418: 1 --> 2  
Char. 441: 1 --> 2  
Char. 474: 0 --> 2  
Char. 519: 2 --> 0  
Char. 556: 1 --> 0  
Char. 613: 1 --> 2  
Node 58 :  
Char. 22: 0.585-0.588 --> 0.689-0.720  
Char. 27: 0.340-0.388 --> 0.463-0.501  
Char. 35: 0.351-0.466 --> 0.575-0.595  
Char. 46: 0.445-0.521 --> 0.658-0.665  
Char. 49: 0.431-0.567 --> 0.746  
Char. 77: 0.309 --> 0.333-0.395  
Char. 84: 0.257-0.322 --> 0.129-0.250  
Char. 86: 0.385-0.462 --> 0.512  
Char. 88: 0.338-0.582 --> 0.619-0.624  
Char. 116: 0.494 --> 0.333-0.380  
Char. 124: 0.185 --> 0.268-0.294  
Char. 133: 0.342 --> 0.303-0.338  
Char. 223: 0.220-0.228 --> 0.242-0.324  
Char. 335: 0.189 --> 0.210  
Char. 344: 0.411-0.462 --> 0.150-0.184  
Char. 346: 0.498 --> 0.480  
Char. 354: 0.405-0.481 --> 0.292-0.315  
Char. 356: 0.389 --> 0.309-0.356  
Char. 368: 0.550-0.607 --> 0.490  
Char. 421: 0 --> 1  
Char. 438: 0 --> 1  
Char. 440: 1 --> 0  
Char. 442: 0 --> 1  
Char. 443: 0 --> 1  
Char. 486: 0 --> 1  
Char. 488: 0 --> 1  
Char. 489: 0 --> 1  
Char. 504: 0 --> 1  
Node 59 :  
Char. 11: 0.308-0.391 --> 0.147-0.166

Char. 30: 0.200-0.212 --> 0.297-0.436  
Char. 36: 0.451-0.472 --> 0.567  
Char. 38: 0.411 --> 0.239-0.369  
Char. 41: 0.279-0.282 --> 0.276  
Char. 42: 0.425-0.481 --> 0.553  
Char. 43: 0.368-0.506 --> 0.530-0.612  
Char. 58: 0.539-0.586 --> 0.606  
Char. 60: 0.544-0.697 --> 0.401-0.505  
Char. 94: 0.292-0.362 --> 0.108-0.196  
Char. 96: 0.370 --> 0.266-0.280  
Char. 99: 0.535-0.555 --> 0.297-0.308  
Char. 100: 0.229-0.230 --> 0.213  
Char. 102: 0.519-0.554 --> 0.459-0.514  
Char. 108: 0.386-0.422 --> 0.353-0.359  
Char. 113: 0.656-0.679 --> 0.427-0.549  
Char. 125: 0.171-0.245 --> 0.159-0.162  
Char. 132: 0.546-0.682 --> 0.544  
Char. 133: 0.472-0.488 --> 0.342  
Char. 135: 0.317-0.434 --> 0.292-0.307  
Char. 137: 0.413-0.455 --> 0.313-0.334  
Char. 222: 0.563-0.617 --> 0.452  
Char. 230: 0.428 --> 0.571  
Char. 240: 0.500 --> 0.583  
Char. 320: 0.480-0.484 --> 0.335-0.441  
Char. 324: 0.594-0.601 --> 0.630-0.640  
Char. 333: 0.417-0.474 --> 0.232-0.283  
Char. 334: 0.199 --> 0.172  
Char. 350: 0.635 --> 0.321  
Char. 351: 0.514 --> 0.495  
Char. 356: 0.410-0.441 --> 0.389  
Char. 369: 0.437-0.522 --> 0.249-0.284  
Char. 436: 1 --> 0  
Char. 448: 1 --> 0  
Char. 449: 0 --> 1  
Char. 517: 1 --> 0  
Char. 522: 1 --> 0  
Char. 611: 1 --> 2  
Node 60 :  
Char. 4: 0.453-0.547 --> 0.418-0.443  
Char. 11: 0.414-0.423 --> 0.308-0.391  
Char. 12: 0.455 --> 0.325-0.351

Char. 19: 0.366-0.399 --> 0.492  
Char. 53: 0.642-0.670 --> 0.445-0.586  
Char. 56: 0.376-0.387 --> 0.453-0.534  
Char. 64: 0.346-0.349 --> 0.207-0.277  
Char. 71: 0.474-0.482 --> 0.495-0.502  
Char. 79: 0.528-0.598 --> 0.465-0.516  
Char. 110: 0.577 --> 0.490-0.565  
Char. 113: 0.682 --> 0.656-0.679  
Char. 326: 0.380 --> 0.211-0.316  
Char. 340: 0.492 --> 0.583  
Char. 370: 0.448 --> 0.415-0.430  
Char. 463: 1 --> 2  
Char. 508: 0 --> 1  
Char. 519: 0 --> 2  
Node 61 :  
Char. 1: 0.326-0.363 --> 0.270  
Char. 3: 0.476-0.637 --> 0.357  
Char. 12: 0.460 --> 0.455  
Char. 16: 0.525-0.590 --> 0.484  
Char. 17: 0.634-0.641 --> 0.433  
Char. 18: 0.475-0.636 --> 0.399-0.474  
Char. 20: 0.824-0.827 --> 0.758-0.806  
Char. 24: 0.592-0.597 --> 0.362  
Char. 25: 0.524-0.550 --> 0.344-0.382  
Char. 26: 0.457-0.462 --> 0.456  
Char. 29: 0.670 --> 0.496-0.522  
Char. 34: 0.614-0.671 --> 0.399  
Char. 37: 0.558-0.581 --> 0.297-0.356  
Char. 46: 0.533 --> 0.521  
Char. 48: 0.567-0.599 --> 0.524  
Char. 49: 0.578-0.732 --> 0.431-0.567  
Char. 54: 0.598-0.634 --> 0.401-0.424  
Char. 55: 0.269-0.300 --> 0.364-0.401  
Char. 63: 0.490 --> 0.518  
Char. 70: 0.322 --> 0.230-0.295  
Char. 73: 0.289 --> 0.326-0.355  
Char. 77: 0.579-0.608 --> 0.283-0.309  
Char. 137: 0.657-0.754 --> 0.455  
Char. 339: 0.516 --> 0.526  
Char. 369: 0.554-0.668 --> 0.522  
Char. 370: 0.502 --> 0.448

Char. 421: 1 --> 0  
Char. 466: 0 --> 1  
Node 62 :  
Char. 1: 0.423 --> 0.326-0.363  
Char. 2: 0.414 --> 0.347  
Char. 5: 0.393 --> 0.343-0.347  
Char. 7: 0.383-0.415 --> 0.339  
Char. 43: 0.295 --> 0.368-0.506  
Char. 44: 0.325 --> 0.383-0.407  
Char. 79: 0.617-0.638 --> 0.528-0.598  
Char. 85: 0.512 --> 0.481-0.511  
Char. 86: 0.597-0.606 --> 0.385-0.462  
Char. 89: 0.577-0.596 --> 0.502-0.509  
Char. 107: 0.738-0.797 --> 0.375-0.408  
Char. 112: 0.588-0.623 --> 0.467  
Char. 323: 0.618-0.668 --> 0.413-0.528  
Char. 346: 0.627-0.716 --> 0.498  
Char. 404: 2 --> 0  
Char. 414: 0 --> 1  
Char. 462: 2 --> 1  
Node 63 :  
Char. 1: 0.491-0.569 --> 0.423  
Char. 2: 0.520-0.579 --> 0.414  
Char. 35: 0.627-0.638 --> 0.396-0.466  
Char. 36: 0.600 --> 0.419-0.472  
Char. 40: 0.580-0.600 --> 0.468-0.472  
Char. 44: 0.290 --> 0.325  
Char. 52: 0.475-0.520 --> 0.562-0.607  
Char. 59: 0.476-0.520 --> 0.536-0.552  
Char. 67: 0.269-0.446 --> 0.209-0.241  
Char. 68: 0.609-0.639 --> 0.291-0.327  
Char. 69: 0.441-0.449 --> 0.243-0.253  
Char. 85: 0.570-0.580 --> 0.512  
Char. 87: 0.555-0.613 --> 0.414  
Char. 88: 0.587-0.608 --> 0.433  
Char. 91: 0.559-0.612 --> 0.398-0.452  
Char. 92: 0.503-0.534 --> 0.427-0.429  
Char. 93: 0.571-0.614 --> 0.366-0.401  
Char. 95: 0.503 --> 0.396  
Char. 103: 0.371-0.456 --> 0.237-0.291  
Char. 105: 0.475 --> 0.315-0.365

Char. 106: 0.524-0.661 --> 0.359  
Char. 110: 0.773 --> 0.577-0.715  
Char. 111: 0.531-0.623 --> 0.305-0.329  
Char. 116: 0.492 --> 0.494-0.541  
Char. 119: 0.594-0.621 --> 0.549  
Char. 120: 0.651-0.727 --> 0.491  
Char. 124: 0.256-0.473 --> 0.109-0.185  
Char. 126: 0.424-0.434 --> 0.566  
Char. 132: 0.737 --> 0.546-0.682  
Char. 226: 0.595 --> 0.542-0.561  
Char. 227: 0.348-0.354 --> 0.240  
Char. 236: 0.305-0.341 --> 0.264  
Char. 246: 0.297-0.407 --> 0.190  
Char. 322: 0.818-0.887 --> 0.888-0.907  
Char. 347: 0.122 --> 0.132-0.134  
Char. 352: 0.362-0.418 --> 0.350  
Char. 359: 0.634 --> 0.500  
Char. 424: 1 --> 2  
Char. 467: 0 --> 1  
Char. 609: 2 --> 3  
Node 64 :  
Char. 520: 0 --> 1  
Node 65 :  
Char. 0: 0.368-0.413 --> 0.504-0.529  
Char. 15: 0.584-0.606 --> 0.388-0.478  
Char. 16: 0.657-0.713 --> 0.525-0.590  
Char. 26: 0.547-0.550 --> 0.457-0.462  
Char. 418: 2 --> 1  
Char. 465: 2 --> 1  
Char. 518: 0 --> 1  
Node 66 :  
Char. 20: 0.638 --> 0.824-0.827  
Char. 23: 0.534-0.540 --> 0.745-0.811  
Char. 29: 0.414-0.501 --> 0.670  
Char. 48: 0.614-0.682 --> 0.567-0.599  
Char. 51: 0.564-0.617 --> 0.693-0.719  
Char. 58: 0.425-0.460 --> 0.480  
Char. 59: 0.314-0.416 --> 0.445-0.520  
Char. 70: 0.442 --> 0.370-0.409  
Char. 79: 0.370-0.427 --> 0.617-0.638  
Char. 83: 0.550 --> 0.448-0.481

Char. 321: 0.705-0.722 --> 0.774-0.797  
Char. 322: 0.506-0.549 --> 0.781-0.814  
Char. 328: 0.148-0.158 --> 0.317-0.348  
Char. 329: 0.072-0.228 --> 0.431-0.433  
Char. 464: 0 --> 1  
Node 67 :  
Char. 20: 0.555 --> 0.638  
Char. 23: 0.503 --> 0.534-0.540  
Char. 30: 0.516-0.521 --> 0.492  
Char. 35: 0.388-0.433 --> 0.627-0.638  
Char. 36: 0.555 --> 0.600  
Char. 41: 0.496 --> 0.332  
Char. 44: 0.121-0.173 --> 0.290  
Char. 49: 0.547 --> 0.675-0.732  
Char. 50: 0.471 --> 0.500-0.510  
Char. 58: 0.302-0.404 --> 0.425-0.460  
Char. 60: 0.615-0.669 --> 0.697-0.714  
Char. 70: 0.469-0.520 --> 0.442  
Char. 74: 0.616-0.662 --> 0.509-0.558  
Char. 78: 0.553-0.720 --> 0.451-0.456  
Char. 81: 0.475 --> 0.570-0.579  
Char. 321: 0.389-0.392 --> 0.705-0.722  
Char. 322: 0.464 --> 0.506-0.549  
Char. 345: 0.738 --> 0.668-0.732  
Char. 422: 1 --> 2  
Char. 424: 0 --> 1  
Char. 487: 1 --> 0  
Char. 490: 0 --> 2  
Char. 511: 1 --> 0  
Node 68 :  
Char. 0: 0.244 --> 0.368  
Char. 1: 0.418 --> 0.491-0.569  
Char. 2: 0.411 --> 0.639-0.652  
Char. 3: 0.528 --> 0.608-0.637  
Char. 11: 0.569 --> 0.620  
Char. 12: 0.578 --> 0.624-0.751  
Char. 13: 0.575 --> 0.677  
Char. 14: 0.413 --> 0.629  
Char. 16: 0.627 --> 0.657-0.713  
Char. 18: 0.551 --> 0.622-0.638  
Char. 20: 0.444 --> 0.555

Char. 31: 0.610 --> 0.595  
 Char. 36: 0.358 --> 0.555  
 Char. 49: 0.511-0.528 --> 0.547  
 Char. 57: 0.635 --> 0.841-0.929  
 Char. 62: 0.540 --> 0.541-0.619  
 Char. 66: 0.236 --> 0.237-0.334  
 Char. 67: 0.496-0.503 --> 0.446  
 Char. 69: 0.568 --> 0.441-0.473  
 Char. 87: 0.450 --> 0.555-0.613  
 Char. 88: 0.492 --> 0.587-0.608  
 Char. 91: 0.411 --> 0.559-0.612  
 Char. 92: 0.394 --> 0.503-0.534  
 Char. 107: 0.462 --> 0.572-0.744  
 Char. 108: 0.616-0.664 --> 0.667-0.677  
 Char. 112: 0.160-0.509 --> 0.588-0.623  
 Char. 126: 0.495 --> 0.426-0.434  
 Char. 330: 0.576 --> 0.593-0.596  
 Char. 341: 0.633-0.655 --> 0.469  
 Char. 347: 0.213 --> 0.122  
 Char. 348: 0.364 --> 0.317-0.331  
 Char. 404: 0 --> 2  
 Char. 408: 1 --> 2  
 Node 69 :  
 Char. 0: 0.047-0.067 --> 0.244  
 Char. 8: 0.444 --> 0.435-0.442  
 Char. 20: 0.344 --> 0.444  
 Char. 27: 0.445 --> 0.442  
 Char. 38: 0.603 --> 0.461-0.488  
 Char. 66: 0.227 --> 0.236  
 Char. 70: 0.665-0.678 --> 0.469-0.520  
 Char. 72: 0.338-0.409 --> 0.328  
 Char. 75: 0.269-0.393 --> 0.397-0.402  
 Char. 101: 0.436-0.457 --> 0.506-0.592  
 Char. 115: 0.702 --> 0.477-0.501  
 Char. 120: 0.864 --> 0.651-0.727  
 Char. 121: 0.577 --> 0.403-0.572  
 Char. 124: 0.640 --> 0.629  
 Char. 127: 0.330-0.383 --> 0.511  
 Char. 129: 0.447-0.488 --> 0.366-0.396  
 Char. 130: 0.348-0.364 --> 0.415-0.445  
 Char. 135: 0.514 --> 0.398-0.434  
 Char. 139: 0.726-0.809 --> 0.404-0.647  
 Char. 166: 0.876 --> 0.906-0.908  
 Char. 173: 0.777 --> 0.794-0.877  
 Char. 179: 0.589 --> 0.631  
 Char. 189: 0.367 --> 0.205-0.307  
 Char. 214: 0.673-0.807 --> 0.560  
 Char. 215: 0.664 --> 0.413  
 Char. 216: 0.523 --> 0.466-0.511  
 Char. 220: 0.799 --> 0.527-0.597  
 Char. 221: 0.741 --> 0.360  
 Char. 226: 0.694-0.861 --> 0.595  
 Char. 227: 0.707 --> 0.348-0.354  
 Char. 230: 0.476-0.714 --> 0.428  
 Char. 235: 0.627-0.833 --> 0.474-0.525  
 Char. 236: 0.656-0.724 --> 0.305-0.341  
 Char. 238: 0.428 --> 0.335  
 Char. 239: 0.700 --> 0.600  
 Char. 244: 0.166-0.500 --> 0.000  
 Char. 257: 0.187 --> 0.568  
 Char. 258: 0.121 --> 0.315  
 Char. 269: 0.467 --> 0.610-0.626  
 Char. 283: 0.290 --> 0.489  
 Char. 288: 0.500 --> 0.400  
 Char. 291: 0.391 --> 0.555  
 Char. 320: 0.522-0.523 --> 0.484  
 Char. 321: 0.081-0.327 --> 0.389-0.392  
 Char. 329: 0.287 --> 0.228  
 Char. 347: 0.215-0.246 --> 0.213  
 Char. 355: 0.379-0.395 --> 0.411  
 Char. 359: 0.805 --> 0.634-0.678  
 Char. 360: 0.791-0.995 --> 0.566-0.591  
 Char. 361: 0.214-0.227 --> 0.254-0.265  
 Char. 362: 0.424-0.510 --> 0.381-0.416  
 Char. 365: 0.271 --> 0.558  
 Char. 369: 0.596 --> 0.580  
 Char. 370: 0.512 --> 0.477  
 Char. 371: 0.778-0.788 --> 0.425-0.621  
 Char. 372: 0.701-0.752 --> 0.414-0.655  
 Char. 385: 0.568 --> 0.351  
 Char. 392: 0.198 --> 0.210-0.451  
 Char. 457: 1 --> 0

Char. 474: 1 --> 2  
 Char. 532: 0 --> 1  
 Char. 563: 3 --> 1  
 Node 70 :  
 No synapomorphies  
 Node 71 :  
 Char. 40: 0.468-0.472 --> 0.506  
 Char. 42: 0.425-0.481 --> 0.484  
 Char. 44: 0.383-0.407 --> 0.474  
 Char. 45: 0.593 --> 0.746  
 Char. 50: 0.539-0.659 --> 0.695  
 Char. 52: 0.562-0.607 --> 0.394  
 Char. 58: 0.586 --> 0.590  
 Char. 59: 0.536-0.552 --> 0.580  
 Char. 91: 0.452 --> 0.453  
 Char. 337: 0.303-0.432 --> 0.144  
 Char. 338: 0.363-0.366 --> 0.399  
 Char. 345: 0.579-0.668 --> 0.502  
 Char. 400: 1 --> 2  
 Char. 406: 1 --> 0  
 Char. 415: 0 --> 1  
 Char. 418: 1 --> 2  
 Node 72 :  
 Char. 0: 0.504-0.536 --> 0.585-0.595  
 Char. 15: 0.388-0.478 --> 0.612  
 Char. 16: 0.525-0.590 --> 0.686  
 Char. 26: 0.457-0.462 --> 0.520  
 Char. 32: 0.452-0.462 --> 0.384  
 Char. 76: 0.376-0.420 --> 0.370  
 Char. 320: 0.480-0.484 --> 0.649  
 Char. 330: 0.471-0.572 --> 0.448  
 Char. 334: 0.199-0.205 --> 0.128-0.130  
 Char. 487: 0 --> 1  
 Char. 499: 1 --> 0  
 Char. 502: 2 --> 3  
 Char. 503: 1 --> 0  
 Char. 504: 0 --> 1  
 Char. 506: 0 --> 1  
 Char. 520: 1 --> 0  
 Node 73 :  
 Char. 13: 0.347-0.352 --> 0.479  
 Char. 19: 0.492 --> 0.514-0.618  
 Char. 62: 0.287-0.368 --> 0.411-0.436  
 Char. 64: 0.246-0.277 --> 0.360-0.396  
 Char. 65: 0.524-0.619 --> 0.297  
 Char. 66: 0.338-0.581 --> 0.278  
 Char. 76: 0.376-0.420 --> 0.456-0.475  
 Char. 105: 0.282-0.315 --> 0.228-0.271  
 Char. 115: 0.370 --> 0.327  
 Char. 136: 0.243 --> 0.269  
 Char. 143: 0.479-0.560 --> 0.696  
 Char. 147: 0.589 --> 0.638  
 Char. 158: 0.557-0.594 --> 0.698-0.732  
 Char. 159: 0.582-0.616 --> 0.726-0.825  
 Char. 188: 0.339-0.414 --> 0.573-0.702  
 Char. 229: 0.333-0.444 --> 0.666  
 Char. 239: 0.300-0.400 --> 0.500  
 Char. 248: 0.163-0.281 --> 0.301  
 Char. 293: 0.500 --> 0.250  
 Char. 298: 0.236-0.363 --> 0.392  
 Char. 300: 0.589-0.655 --> 0.420  
 Char. 302: 0.500-0.833 --> 0.250  
 Char. 328: 0.221-0.317 --> 0.445  
 Char. 329: 0.316-0.433 --> 0.567  
 Char. 334: 0.139-0.172 --> 0.112-0.129  
 Char. 335: 0.210 --> 0.305-0.326  
 Char. 340: 0.583-0.596 --> 0.304  
 Char. 342: 0.437 --> 0.473-0.560  
 Char. 358: 0.376-0.380 --> 0.388-0.442  
 Char. 364: 0.359-0.388 --> 0.417  
 Char. 385: 0.338-0.437 --> 0.486-0.588  
 Char. 408: 2 --> 1  
 Char. 422: 2 --> 1  
 Char. 437: 1 --> 0  
 Char. 439: 1 --> 2  
 Char. 496: 1 --> 2  
 Char. 512: 1 --> 2  
 Char. 529: 0 --> 2  
 Char. 531: 0 --> 1  
 Char. 563: 1 --> 2  
 Char. 582: 12 --> 0  
 Char. 614: 0 --> 1

Node 74 :

Char. 42: 0.553-0.561 --> 0.446  
Char. 43: 0.530-0.612 --> 0.408  
Char. 60: 0.401-0.505 --> 0.604  
Char. 91: 0.409 --> 0.290  
Char. 139: 0.384 --> 0.129-0.149  
Char. 347: 0.132-0.151 --> 0.280  
Char. 348: 0.399 --> 0.478  
Char. 357: 0.397-0.432 --> 0.219-0.381  
Char. 402: 0 --> 1  
Char. 409: 0 --> 1  
Char. 411: 0 --> 1  
Char. 412: 1 --> 0  
Char. 421: 1 --> 2

Node 75 :

Char. 20: 0.804-0.845 --> 0.756  
Char. 22: 0.689-0.826 --> 0.666  
Char. 85: 0.462 --> 0.334-0.414  
Char. 86: 0.512 --> 0.247-0.343  
Char. 87: 0.502-0.566 --> 0.409  
Char. 88: 0.619-0.637 --> 0.507  
Char. 89: 0.460-0.461 --> 0.323-0.402  
Char. 92: 0.427 --> 0.223-0.409  
Char. 322: 0.850 --> 0.818  
Char. 323: 0.396-0.498 --> 0.547  
Char. 518: 1 --> 2

Node 76 :

Char. 9: 0.396-0.397 --> 0.381  
Char. 15: 0.229 --> 0.204  
Char. 16: 0.345-0.429 --> 0.323  
Char. 17: 0.310 --> 0.255  
Char. 26: 0.408 --> 0.382  
Char. 27: 0.463 --> 0.243  
Char. 32: 0.452 --> 0.335-0.431  
Char. 34: 0.325 --> 0.318  
Char. 35: 0.595 --> 0.750-0.781  
Char. 36: 0.701 --> 0.705  
Char. 37: 0.260 --> 0.245  
Char. 324: 0.652 --> 0.670  
Char. 326: 0.316 --> 0.146  
Char. 332: 0.652 --> 0.673

Char. 333: 0.283 --> 0.442-0.574

Char. 338: 0.447 --> 0.506  
Char. 429: 0 --> 1  
Char. 430: 0 --> 1  
Char. 482: 0 --> 1  
Char. 517: 0 --> 1  
Char. 520: 1 --> 3

Node 77 :

Char. 3: 0.195 --> 0.196  
Char. 5: 0.369 --> 0.357  
Char. 6: 0.581 --> 0.528  
Char. 12: 0.209-0.237 --> 0.183  
Char. 15: 0.091-0.140 --> 0.158  
Char. 16: 0.101-0.139 --> 0.235  
Char. 17: 0.023-0.105 --> 0.155  
Char. 18: 0.126-0.204 --> 0.218  
Char. 24: 0.054-0.061 --> 0.139  
Char. 25: 0.086 --> 0.153  
Char. 26: 0.244 --> 0.277  
Char. 30: 0.335 --> 0.420  
Char. 31: 0.170-0.243 --> 0.331  
Char. 34: 0.165 --> 0.183  
Char. 37: 0.169 --> 0.208  
Char. 39: 0.378 --> 0.318  
Char. 40: 0.413 --> 0.378  
Char. 42: 0.538-0.634 --> 0.760  
Char. 43: 0.554-0.646 --> 0.823  
Char. 45: 0.834 --> 0.704  
Char. 50: 0.803-0.856 --> 0.739  
Char. 52: 0.379-0.450 --> 0.522  
Char. 55: 0.202-0.364 --> 0.377  
Char. 58: 0.838 --> 0.908  
Char. 60: 0.497 --> 0.247  
Char. 61: 0.689-0.797 --> 0.665  
Char. 62: 0.111-0.185 --> 0.206  
Char. 63: 0.764-0.826 --> 0.701  
Char. 68: 0.323-0.392 --> 0.463  
Char. 69: 0.389-0.473 --> 0.536  
Char. 78: 0.117-0.163 --> 0.277  
Char. 80: 0.738-0.758 --> 0.616  
Char. 81: 0.219-0.283 --> 0.333



Char. 85: 0.115 --> 0.128  
Char. 87: 0.409-0.554 --> 0.321  
Char. 88: 0.507-0.735 --> 0.442  
Char. 89: 0.110 --> 0.116  
Char. 115: 0.209-0.212 --> 0.241  
Char. 119: 0.302-0.303 --> 0.297  
Char. 123: 0.855 --> 0.859  
Char. 126: 0.293-0.526 --> 0.610  
Char. 127: 0.276-0.299 --> 0.178  
Char. 129: 0.290-0.337 --> 0.498  
Char. 130: 0.446-0.463 --> 0.303  
Char. 134: 0.246-0.321 --> 0.202  
Char. 135: 0.216-0.274 --> 0.365  
Char. 136: 0.222 --> 0.199  
Char. 138: 0.430 --> 0.431  
Char. 227: 0.187 --> 0.110  
Char. 230: 0.571 --> 0.285  
Char. 236: 0.083 --> 0.041  
Char. 240: 0.583 --> 0.416  
Char. 241: 0.100 --> 0.000  
Char. 320: 0.266 --> 0.347  
Char. 321: 0.726-0.786 --> 0.672  
Char. 323: 0.652-0.878 --> 0.485  
Char. 325: 0.314 --> 0.260  
Char. 326: 0.144-0.316 --> 0.120  
Char. 331: 0.558-0.559 --> 0.469  
Char. 332: 0.769 --> 0.720  
Char. 334: 0.128 --> 0.131  
Char. 336: 0.194-0.219 --> 0.252  
Char. 337: 0.156-0.179 --> 0.289  
Char. 338: 0.506-0.536 --> 0.278  
Char. 341: 0.182-0.255 --> 0.296  
Char. 346: 0.317-0.424 --> 0.252  
Char. 349: 0.463-0.499 --> 0.458  
Char. 358: 0.510 --> 0.282  
Char. 368: 0.347-0.524 --> 0.535  
Char. 443: 1 --> 0  
Char. 444: 2 --> 3  
Char. 447: 0 --> 1  
Char. 456: 0 --> 1  
Char. 458: 1 --> 0

Node 78 :  
Char. 5: 0.463 --> 0.369  
Char. 27: 0.243 --> 0.193-0.234  
Char. 30: 0.297-0.331 --> 0.335  
Char. 35: 0.750 --> 0.664-0.697  
Char. 39: 0.444-0.492 --> 0.378  
Char. 40: 0.440-0.446 --> 0.413  
Char. 46: 0.644-0.665 --> 0.469-0.579  
Char. 76: 0.461 --> 0.289-0.339  
Char. 98: 0.666 --> 0.617-0.664  
Char. 101: 0.721 --> 0.602-0.684  
Char. 125: 0.095-0.101 --> 0.104  
Char. 131: 0.291-0.366 --> 0.163-0.252  
Char. 133: 0.303 --> 0.224  
Char. 136: 0.237-0.318 --> 0.222  
Char. 139: 0.149 --> 0.242-0.309  
Char. 140: 0.420 --> 0.381  
Char. 141: 0.339-0.374 --> 0.133  
Char. 145: 0.669 --> 0.443  
Char. 148: 0.611 --> 0.365  
Char. 154: 0.358 --> 0.392  
Char. 156: 0.554 --> 0.575  
Char. 168: 0.080 --> 0.594  
Char. 169: 0.330 --> 0.478  
Char. 170: 0.185 --> 0.514  
Char. 171: 0.150-0.159 --> 0.516  
Char. 172: 0.353-0.413 --> 0.451  
Char. 173: 0.714 --> 0.691  
Char. 175: 0.516-0.528 --> 0.681  
Char. 176: 0.546 --> 0.682  
Char. 177: 0.512 --> 0.712  
Char. 178: 0.718 --> 0.757  
Char. 179: 0.901-0.950 --> 0.812  
Char. 180: 0.120 --> 0.156  
Char. 185: 0.259 --> 0.550  
Char. 186: 0.090 --> 0.378  
Char. 227: 0.200 --> 0.187  
Char. 228: 0.423 --> 0.200-0.366  
Char. 229: 0.666 --> 0.444-0.555  
Char. 236: 0.178 --> 0.083  
Char. 238: 0.274 --> 0.195-0.207

Char. 289: 0.246 --> 0.253  
Char. 301: 0.658 --> 0.651  
Char. 325: 0.318-0.365 --> 0.314  
Char. 333: 0.442-0.560 --> 0.361-0.413  
Char. 342: 0.473-0.560 --> 0.316-0.395  
Char. 351: 0.398-0.399 --> 0.475-0.530  
Char. 366: 0.579 --> 0.218-0.436  
Char. 367: 0.691 --> 0.680-0.689  
Char. 371: 0.196 --> 0.267-0.346  
Char. 372: 0.229 --> 0.333-0.396  
Char. 373: 0.653 --> 0.228  
Char. 374: 0.307 --> 0.495  
Char. 376: 0.719-0.779 --> 0.627  
Char. 380: 0.438-0.614 --> 0.397  
Char. 382: 0.582 --> 0.536  
Char. 383: 0.524-0.557 --> 0.621  
Char. 388: 0.595 --> 0.442  
Char. 389: 0.758 --> 0.602  
Char. 390: 0.555-0.574 --> 0.210  
Char. 397: 0.065-0.134 --> 0.224  
Char. 398: 0.084-0.112 --> 0.154  
Char. 399: 0.339 --> 0.264  
Char. 452: 0 --> 1  
Char. 543: 2 --> 1  
Char. 553: 2 --> 0  
Char. 555: 1 --> 0  
Char. 556: 1 --> 0  
Char. 570: 0 --> 1  
Char. 627: 2 --> 1  
Node 79 :  
Char. 22: 0.584-0.616 --> 0.284-0.557  
Char. 54: 0.495-0.536 --> 0.558-0.579  
Char. 56: 0.453-0.624 --> 0.699  
Char. 76: 0.475 --> 0.461  
Char. 92: 0.189-0.201 --> 0.068-0.134  
Char. 97: 0.349-0.368 --> 0.405  
Char. 118: 0.212-0.242 --> 0.176  
Char. 122: 0.473-0.545 --> 0.651  
Char. 144: 0.266-0.423 --> 0.470-0.516  
Char. 150: 0.656 --> 0.335-0.577  
Char. 154: 0.077-0.198 --> 0.358

Char. 156: 0.465 --> 0.554  
Char. 165: 0.570-0.641 --> 0.466-0.533  
Char. 176: 0.478-0.537 --> 0.546  
Char. 177: 0.349 --> 0.512  
Char. 178: 0.616-0.624 --> 0.718  
Char. 189: 0.377 --> 0.197-0.213  
Char. 231: 0.100 --> 0.200-0.300  
Char. 235: 0.130-0.252 --> 0.300-0.314  
Char. 237: 0.533-0.766 --> 0.270  
Char. 348: 0.423-0.478 --> 0.377-0.403  
Char. 359: 0.445-0.529 --> 0.574-0.677  
Char. 360: 0.273-0.331 --> 0.377-0.412  
Char. 362: 0.501-0.503 --> 0.764  
Char. 363: 0.576-0.623 --> 0.771  
Char. 364: 0.437-0.543 --> 0.588  
Char. 367: 0.692-0.693 --> 0.691  
Char. 378: 0.815 --> 0.509-0.742  
Char. 382: 0.624-0.639 --> 0.582  
Char. 387: 0.575-0.620 --> 0.343-0.531  
Char. 399: 0.361-0.416 --> 0.339  
Char. 474: 1 --> 0  
Char. 613: 1 --> 0  
Node 80 :  
Char. 0: 0.672 --> 0.713-0.750  
Char. 1: 0.253 --> 0.161-0.171  
Char. 3: 0.342 --> 0.195  
Char. 6: 0.354-0.356 --> 0.581-0.610  
Char. 12: 0.325-0.351 --> 0.209-0.237  
Char. 17: 0.184 --> 0.103-0.105  
Char. 20: 0.737-0.756 --> 0.616-0.642  
Char. 24: 0.197 --> 0.060-0.061  
Char. 25: 0.223 --> 0.086  
Char. 26: 0.380 --> 0.244  
Char. 28: 0.478 --> 0.223-0.287  
Char. 34: 0.220 --> 0.165  
Char. 41: 0.245 --> 0.203-0.220  
Char. 47: 0.520-0.550 --> 0.366-0.499  
Char. 49: 0.746 --> 0.558-0.679  
Char. 63: 0.724 --> 0.764-0.826  
Char. 78: 0.319 --> 0.119-0.163  
Char. 85: 0.334 --> 0.115

Char. 89: 0.323 --> 0.110  
 Char. 90: 0.279 --> 0.177-0.206  
 Char. 91: 0.264 --> 0.127-0.161  
 Char. 92: 0.223-0.409 --> 0.189-0.201  
 Char. 93: 0.398 --> 0.188-0.274  
 Char. 94: 0.108-0.196 --> 0.018-0.078  
 Char. 95: 0.329 --> 0.207-0.234  
 Char. 99: 0.292 --> 0.149-0.249  
 Char. 108: 0.353 --> 0.261-0.337  
 Char. 111: 0.245 --> 0.101-0.105  
 Char. 112: 0.355 --> 0.178  
 Char. 132: 0.544 --> 0.473-0.538  
 Char. 156: 0.426 --> 0.465  
 Char. 158: 0.698 --> 0.605-0.659  
 Char. 159: 0.726 --> 0.680  
 Char. 160: 0.756 --> 0.724  
 Char. 162: 0.820 --> 0.784  
 Char. 166: 0.913 --> 0.891  
 Char. 174: 0.228-0.364 --> 0.369  
 Char. 181: 0.135 --> 0.117  
 Char. 188: 0.573 --> 0.427-0.482  
 Char. 330: 0.690 --> 0.786-0.850  
 Char. 345: 0.446 --> 0.375  
 Char. 347: 0.328 --> 0.384-0.513  
 Char. 355: 0.276-0.300 --> 0.337-0.403  
 Char. 358: 0.452 --> 0.510  
 Char. 359: 0.385-0.413 --> 0.445-0.529  
 Char. 391: 0.653 --> 0.727-0.773  
 Char. 392: 0.611 --> 0.487  
 Char. 408: 1 --> 0  
 Char. 543: 0 --> 2  
 Char. 552: 2 --> 1  
 Char. 564: 1 --> 2  
 Node 81 :  
 Char. 1: 0.263-0.540 --> 0.253  
 Char. 2: 0.298-0.532 --> 0.222  
 Char. 3: 0.345-0.354 --> 0.342  
 Char. 15: 0.204 --> 0.113-0.140  
 Char. 16: 0.323 --> 0.129-0.139  
 Char. 17: 0.255 --> 0.184  
 Char. 24: 0.211-0.233 --> 0.197  
 Char. 26: 0.382 --> 0.380  
 Char. 34: 0.318 --> 0.220  
 Char. 36: 0.705 --> 0.723-0.800  
 Char. 37: 0.245 --> 0.169  
 Char. 40: 0.468-0.504 --> 0.440-0.446  
 Char. 41: 0.254-0.276 --> 0.245  
 Char. 42: 0.372-0.446 --> 0.538-0.634  
 Char. 43: 0.341-0.408 --> 0.554-0.646  
 Char. 44: 0.523 --> 0.790  
 Char. 50: 0.755 --> 0.803-0.850  
 Char. 52: 0.487 --> 0.450  
 Char. 59: 0.706-0.840 --> 0.864-0.890  
 Char. 60: 0.604-0.670 --> 0.530  
 Char. 62: 0.411 --> 0.185  
 Char. 65: 0.218-0.297 --> 0.338-0.497  
 Char. 66: 0.237-0.278 --> 0.291-0.392  
 Char. 70: 0.216-0.295 --> 0.138-0.207  
 Char. 72: 0.224-0.265 --> 0.179  
 Char. 74: 0.477-0.482 --> 0.582  
 Char. 79: 0.352 --> 0.292-0.319  
 Char. 99: 0.297-0.308 --> 0.292  
 Char. 102: 0.462-0.514 --> 0.552-0.670  
 Char. 103: 0.155-0.267 --> 0.094-0.134  
 Char. 104: 0.618-0.718 --> 0.787  
 Char. 106: 0.397 --> 0.319-0.339  
 Char. 107: 0.373 --> 0.152-0.254  
 Char. 110: 0.408-0.492 --> 0.337-0.343  
 Char. 112: 0.429 --> 0.355  
 Char. 114: 0.250 --> 0.240  
 Char. 115: 0.254 --> 0.209-0.212  
 Char. 116: 0.315 --> 0.264  
 Char. 118: 0.294 --> 0.242  
 Char. 119: 0.347 --> 0.302-0.303  
 Char. 120: 0.396 --> 0.353  
 Char. 124: 0.380 --> 0.455  
 Char. 125: 0.111 --> 0.101  
 Char. 135: 0.292-0.307 --> 0.216-0.274  
 Char. 332: 0.673 --> 0.769-0.825  
 Char. 335: 0.326 --> 0.337  
 Char. 337: 0.183 --> 0.179  
 Char. 340: 0.196-0.304 --> 0.348-0.630

Char. 352: 0.350 --> 0.268-0.274  
Char. 358: 0.388-0.442 --> 0.452  
Char. 361: 0.241-0.256 --> 0.286-0.316  
Char. 362: 0.469 --> 0.501-0.503  
Char. 369: 0.249-0.284 --> 0.379-0.409  
Char. 370: 0.425 --> 0.431-0.442  
Char. 414: 1 --> 2  
Char. 425: 0 --> 1  
Char. 464: 1 --> 0  
Char. 490: 2 --> 1  
Char. 525: 1 --> 2  
Node 82 :  
Char. 0: 0.713-0.750 --> 0.805  
Char. 3: 0.195 --> 0.148  
Char. 5: 0.463-0.515 --> 0.534  
Char. 6: 0.581-0.610 --> 0.714  
Char. 26: 0.244 --> 0.236  
Char. 34: 0.165 --> 0.163  
Char. 37: 0.169 --> 0.116  
Char. 41: 0.203-0.220 --> 0.192  
Char. 42: 0.538-0.634 --> 0.780  
Char. 43: 0.554-0.646 --> 0.774  
Char. 45: 0.834 --> 0.755  
Char. 60: 0.497-0.530 --> 0.304  
Char. 74: 0.582-0.594 --> 0.632  
Char. 76: 0.475 --> 0.493  
Char. 84: 0.071-0.129 --> 0.037  
Char. 86: 0.247-0.265 --> 0.163  
Char. 87: 0.409 --> 0.346  
Char. 88: 0.507 --> 0.492  
Char. 96: 0.134-0.276 --> 0.048  
Char. 97: 0.349-0.368 --> 0.320  
Char. 99: 0.149-0.249 --> 0.146  
Char. 110: 0.337-0.343 --> 0.120  
Char. 112: 0.178 --> 0.162  
Char. 114: 0.228-0.240 --> 0.106  
Char. 115: 0.209-0.212 --> 0.089  
Char. 117: 0.543-0.580 --> 0.462  
Char. 119: 0.302-0.303 --> 0.277  
Char. 120: 0.332-0.353 --> 0.284  
Char. 121: 0.104-0.170 --> 0.089

Char. 122: 0.473-0.545 --> 0.415  
Char. 123: 0.840-0.855 --> 0.807  
Char. 125: 0.095-0.101 --> 0.080  
Char. 132: 0.473-0.538 --> 0.460  
Char. 135: 0.216-0.274 --> 0.145  
Char. 137: 0.291-0.318 --> 0.285  
Char. 139: 0.129-0.149 --> 0.090  
Char. 237: 0.533-0.766 --> 0.918  
Char. 320: 0.147-0.266 --> 0.341  
Char. 321: 0.726-0.781 --> 0.630  
Char. 324: 0.670-0.721 --> 0.614  
Char. 331: 0.558-0.559 --> 0.475  
Char. 334: 0.128 --> 0.169  
Char. 338: 0.506-0.509 --> 0.376  
Char. 342: 0.473-0.560 --> 0.659  
Char. 344: 0.150-0.184 --> 0.118  
Char. 345: 0.375 --> 0.345  
Char. 346: 0.317-0.424 --> 0.188  
Char. 350: 0.224-0.321 --> 0.164  
Char. 351: 0.398-0.399 --> 0.357  
Char. 355: 0.337-0.403 --> 0.455  
Char. 358: 0.510 --> 0.549  
Char. 363: 0.576-0.623 --> 0.567  
Char. 368: 0.347-0.490 --> 0.308  
Char. 487: 0 --> 1  
Node 83 :  
Char. 1: 0.263-0.270 --> 0.185  
Char. 19: 0.492 --> 0.564-0.708  
Char. 31: 0.214-0.294 --> 0.212  
Char. 52: 0.562 --> 0.417-0.435  
Char. 53: 0.445-0.586 --> 0.419-0.433  
Char. 65: 0.524 --> 0.455-0.477  
Char. 68: 0.276-0.327 --> 0.117-0.183  
Char. 69: 0.243-0.253 --> 0.144-0.224  
Char. 71: 0.495-0.502 --> 0.540  
Char. 82: 0.649-0.699 --> 0.450-0.506  
Char. 111: 0.305-0.329 --> 0.471-0.513  
Char. 112: 0.467 --> 0.476-0.755  
Char. 129: 0.315-0.337 --> 0.236  
Char. 130: 0.446 --> 0.620-0.630  
Char. 138: 0.333-0.468 --> 0.245-0.297

Char. 193: 0.411-0.417 --> 0.472  
Char. 226: 0.542-0.561 --> 0.392-0.463  
Char. 228: 0.265-0.330 --> 0.367-0.459  
Char. 235: 0.271 --> 0.101-0.149  
Char. 236: 0.212 --> 0.049-0.133  
Char. 237: 0.533-0.618 --> 0.749  
Char. 238: 0.227-0.274 --> 0.081-0.154  
Char. 271: 0.176-0.248 --> 0.064  
Char. 272: 0.295-0.358 --> 0.173-0.286  
Char. 276: 0.309-0.336 --> 0.063-0.064  
Char. 277: 0.231-0.232 --> 0.080-0.129  
Char. 279: 0.528-0.621 --> 0.419  
Char. 281: 0.323-0.365 --> 0.058-0.061  
Char. 282: 0.231-0.292 --> 0.116-0.190  
Char. 283: 0.489-0.523 --> 0.716-0.746  
Char. 289: 0.212-0.238 --> 0.044-0.063  
Char. 290: 0.245-0.326 --> 0.174-0.201  
Char. 301: 0.627-0.722 --> 0.773-0.787  
Char. 333: 0.417-0.474 --> 0.593-0.645  
Char. 342: 0.437 --> 0.499  
Char. 355: 0.276-0.300 --> 0.389-0.577  
Char. 356: 0.410-0.441 --> 0.501  
Char. 358: 0.376-0.380 --> 0.440-0.529  
Char. 366: 0.354 --> 0.410-0.585  
Char. 378: 0.256-0.433 --> 0.608-0.627  
Char. 384: 0.378-0.385 --> 0.468  
Char. 403: 2 --> 0  
Char. 410: 0 --> 1  
Char. 412: 1 --> 2  
Char. 414: 1 --> 2  
Char. 423: 0 --> 1  
Char. 433: 1 --> 0  
Char. 435: 1 --> 0  
Char. 441: 1 --> 0  
Char. 464: 1 --> 2  
Char. 471: 2 --> 3  
Char. 493: 2 --> 0  
Char. 511: 0 --> 1  
Char. 521: 1 --> 0  
Char. 532: 1 --> 0  
Char. 549: 0 --> 2

Node 84 :

Char. 0: 0.681-0.745 --> 0.572  
Char. 5: 0.224 --> 0.121  
Char. 6: 0.327 --> 0.233  
Char. 16: 0.249-0.408 --> 0.436  
Char. 23: 0.810 --> 0.939  
Char. 25: 0.168-0.279 --> 0.315  
Char. 26: 0.432-0.447 --> 0.467  
Char. 27: 0.332-0.340 --> 0.380  
Char. 30: 0.110 --> 0.046  
Char. 40: 0.456-0.472 --> 0.567  
Char. 41: 0.279-0.282 --> 0.527  
Char. 58: 0.570 --> 0.590  
Char. 59: 0.536-0.552 --> 0.612  
Char. 66: 0.477 --> 0.545  
Char. 91: 0.394-0.409 --> 0.419  
Char. 100: 0.192 --> 0.200  
Char. 106: 0.285-0.447 --> 0.448  
Char. 111: 0.485 --> 0.574  
Char. 114: 0.332-0.373 --> 0.382  
Char. 137: 0.389-0.395 --> 0.441  
Char. 322: 0.845-0.888 --> 0.922  
Char. 323: 0.161 --> 0.038  
Char. 345: 0.408-0.504 --> 0.562  
Char. 347: 0.134-0.137 --> 0.116  
Char. 351: 0.571 --> 0.527  
Char. 357: 0.520 --> 0.553  
Char. 360: 0.441-0.463 --> 0.480  
Char. 369: 0.459 --> 0.479  
Char. 492: 1 --> 0  
Char. 504: 0 --> 1  
Char. 525: 1 --> 0  
Node 85 :  
Char. 5: 0.343 --> 0.224  
Char. 6: 0.410-0.415 --> 0.327  
Char. 7: 0.147-0.177 --> 0.060-0.087  
Char. 22: 0.588-0.604 --> 0.765-0.784  
Char. 32: 0.316-0.384 --> 0.258-0.292  
Char. 33: 0.397-0.437 --> 0.294-0.374  
Char. 39: 0.371-0.431 --> 0.163-0.320  
Char. 43: 0.414-0.469 --> 0.597-0.622

Char. 46: 0.498-0.546 --> 0.361-0.445  
Char. 60: 0.541-0.615 --> 0.412-0.423  
Char. 66: 0.338-0.449 --> 0.477  
Char. 67: 0.198-0.226 --> 0.161-0.177  
Char. 97: 0.506-0.594 --> 0.479  
Char. 102: 0.616 --> 0.646-0.684  
Char. 104: 0.719 --> 0.747-0.827  
Char. 105: 0.198 --> 0.165  
Char. 111: 0.389-0.471 --> 0.485  
Char. 113: 0.656-0.679 --> 0.558-0.601  
Char. 118: 0.164 --> 0.226-0.260  
Char. 131: 0.249 --> 0.231  
Char. 133: 0.171 --> 0.160  
Char. 136: 0.220-0.230 --> 0.330  
Char. 139: 0.162 --> 0.172-0.187  
Char. 142: 0.414 --> 0.055  
Char. 145: 0.341-0.346 --> 0.731  
Char. 146: 0.392 --> 0.349  
Char. 150: 0.550 --> 0.513  
Char. 151: 0.327-0.345 --> 0.273  
Char. 154: 0.228-0.236 --> 0.315  
Char. 162: 0.931 --> 0.927  
Char. 164: 0.486 --> 0.518  
Char. 165: 0.704-0.726 --> 0.638  
Char. 188: 0.392-0.414 --> 0.321  
Char. 189: 0.119-0.240 --> 0.013  
Char. 321: 0.739-0.789 --> 0.663-0.717  
Char. 323: 0.515-0.532 --> 0.161  
Char. 334: 0.198-0.199 --> 0.114-0.174  
Char. 342: 0.499 --> 0.559  
Char. 346: 0.310-0.410 --> 0.262-0.267  
Char. 357: 0.254-0.397 --> 0.520  
Char. 365: 0.609-0.729 --> 0.504  
Char. 368: 0.684-0.762 --> 0.635  
Char. 369: 0.445 --> 0.459  
Char. 371: 0.172 --> 0.191-0.197  
Char. 372: 0.188-0.194 --> 0.201-0.215  
Char. 373: 0.666 --> 0.767  
Char. 375: 0.263-0.367 --> 0.476  
Char. 378: 0.608-0.627 --> 0.254  
Char. 463: 2 --> 0

Char. 546: 1 --> 0  
Char. 562: 0 --> 2  
Char. 566: 1 --> 0  
Char. 567: 0 --> 1  
Char. 572: 2 --> 1  
Node 86 :  
Char. 17: 0.371-0.419 --> 0.239-0.324  
Char. 18: 0.458-0.474 --> 0.429-0.433  
Char. 21: 0.664-0.766 --> 0.825-0.879  
Char. 24: 0.257 --> 0.197  
Char. 34: 0.353 --> 0.202-0.278  
Char. 37: 0.297-0.311 --> 0.239-0.249  
Char. 62: 0.385-0.424 --> 0.427  
Char. 64: 0.154 --> 0.149  
Char. 65: 0.237-0.318 --> 0.131  
Char. 72: 0.205-0.233 --> 0.088-0.126  
Char. 94: 0.192-0.196 --> 0.177  
Char. 102: 0.571-0.582 --> 0.616  
Char. 103: 0.287-0.291 --> 0.223  
Char. 104: 0.665-0.718 --> 0.719  
Char. 105: 0.309-0.365 --> 0.198  
Char. 110: 0.565 --> 0.508  
Char. 131: 0.337-0.403 --> 0.249  
Char. 132: 0.545 --> 0.488-0.513  
Char. 133: 0.417-0.472 --> 0.171  
Char. 166: 0.906 --> 0.792  
Char. 179: 0.762-0.798 --> 0.822  
Char. 186: 0.074-0.087 --> 0.021  
Char. 201: 0.560 --> 0.578  
Char. 205: 0.250 --> 0.875  
Char. 208: 0.717 --> 0.784  
Char. 237: 0.742-0.749 --> 0.556  
Char. 238: 0.242 --> 0.247  
Char. 246: 0.170-0.177 --> 0.125  
Char. 247: 0.352-0.419 --> 0.313  
Char. 248: 0.256-0.348 --> 0.191  
Char. 263: 0.440 --> 0.553  
Char. 280: 0.333-0.555 --> 0.666  
Char. 303: 0.000 --> 0.500  
Char. 361: 0.315-0.328 --> 0.339-0.373  
Char. 369: 0.431-0.437 --> 0.445

Char. 393: 0.817-0.859 --> 0.754  
Char. 398: 0.143-0.151 --> 0.126  
Char. 453: 1 --> 2  
Char. 494: 1 --> 2  
Char. 507: 1 --> 0  
Char. 521: 0 --> 1  
Char. 536: 1 --> 2  
Char. 591: 2 --> 1  
Char. 602: 0 --> 1  
Char. 603: 0 --> 1  
Char. 621: 1 --> 2  
Char. 631: 01 --> 2  
Node 87 :  
Char. 1: 0.185 --> 0.196-0.272  
Char. 12: 0.325 --> 0.407-0.408  
Char. 14: 0.374 --> 0.402  
Char. 31: 0.212 --> 0.257-0.259  
Char. 47: 0.595 --> 0.590  
Char. 55: 0.364-0.401 --> 0.501-0.551  
Char. 68: 0.183 --> 0.256-0.315  
Char. 100: 0.230 --> 0.192  
Char. 117: 0.641 --> 0.715-0.750  
Char. 132: 0.588 --> 0.545  
Char. 137: 0.413-0.455 --> 0.389-0.395  
Char. 141: 0.402 --> 0.060-0.119  
Char. 160: 0.715-0.794 --> 0.612-0.647  
Char. 161: 0.658-0.815 --> 0.480-0.580  
Char. 170: 0.413 --> 0.162-0.383  
Char. 171: 0.498 --> 0.242-0.441  
Char. 173: 0.748 --> 0.728-0.747  
Char. 180: 0.416 --> 0.226-0.252  
Char. 181: 0.444 --> 0.185-0.192  
Char. 182: 0.321 --> 0.172-0.183  
Char. 183: 0.256-0.257 --> 0.124-0.125  
Char. 184: 0.220-0.342 --> 0.145-0.160  
Char. 186: 0.181 --> 0.074-0.087  
Char. 187: 0.434 --> 0.425-0.432  
Char. 238: 0.154 --> 0.242  
Char. 291: 0.482-0.629 --> 0.416-0.458  
Char. 309: 0.725 --> 0.382-0.542  
Char. 331: 0.620 --> 0.483-0.613

Char. 333: 0.593 --> 0.389-0.462  
Char. 353: 0.500 --> 0.128-0.164  
Char. 367: 0.766 --> 0.570-0.660  
Char. 381: 0.816-0.824 --> 0.776-0.786  
Char. 388: 0.475-0.515 --> 0.519-0.740  
Char. 391: 0.558 --> 0.631-0.638  
Char. 583: 0 --> 2  
Char. 584: 0 --> 1  
Char. 585: 0 --> 1  
Char. 587: 0 --> 1  
Node 88 :  
Char. 0: 0.567 --> 0.681-0.745  
Char. 13: 0.352-0.377 --> 0.343  
Char. 15: 0.342 --> 0.329-0.332  
Char. 20: 0.758 --> 0.725-0.744  
Char. 25: 0.290 --> 0.279  
Char. 30: 0.197 --> 0.110-0.117  
Char. 32: 0.448 --> 0.316-0.384  
Char. 36: 0.472 --> 0.578-0.614  
Char. 65: 0.455-0.477 --> 0.318  
Char. 75: 0.341 --> 0.306-0.327  
Char. 78: 0.451 --> 0.340-0.346  
Char. 79: 0.465 --> 0.227-0.419  
Char. 84: 0.257 --> 0.237-0.244  
Char. 85: 0.462-0.603 --> 0.217-0.297  
Char. 86: 0.385-0.462 --> 0.302-0.360  
Char. 89: 0.460-0.619 --> 0.249-0.308  
Char. 90: 0.514-0.627 --> 0.231-0.241  
Char. 92: 0.427-0.470 --> 0.303-0.358  
Char. 94: 0.292 --> 0.192-0.196  
Char. 95: 0.339-0.398 --> 0.214-0.215  
Char. 96: 0.370 --> 0.322-0.347  
Char. 97: 0.209 --> 0.506-0.594  
Char. 99: 0.535-0.555 --> 0.446  
Char. 107: 0.375-0.723 --> 0.280-0.339  
Char. 108: 0.386 --> 0.143-0.216  
Char. 109: 0.321-0.400 --> 0.247-0.279  
Char. 115: 0.317 --> 0.217  
Char. 116: 0.494-0.566 --> 0.268  
Char. 118: 0.356 --> 0.164  
Char. 119: 0.369 --> 0.292

Char. 120: 0.433 --> 0.307-0.314  
Char. 121: 0.268-0.295 --> 0.124  
Char. 122: 0.518 --> 0.588-0.809  
Char. 123: 0.887 --> 0.898-0.933  
Char. 136: 0.243 --> 0.220-0.230  
Char. 138: 0.245-0.297 --> 0.212-0.236  
Char. 139: 0.196 --> 0.162  
Char. 214: 0.209 --> 0.037-0.122  
Char. 221: 0.174-0.230 --> 0.096  
Char. 226: 0.392-0.463 --> 0.312-0.389  
Char. 227: 0.127-0.173 --> 0.033-0.100  
Char. 230: 0.428 --> 0.714  
Char. 239: 0.300-0.350 --> 0.200  
Char. 241: 0.500 --> 0.400  
Char. 245: 0.145 --> 0.102-0.114  
Char. 246: 0.187 --> 0.177  
Char. 307: 0.256 --> 0.119  
Char. 308: 0.575-0.586 --> 0.682  
Char. 320: 0.480-0.501 --> 0.423  
Char. 323: 0.366-0.498 --> 0.515-0.532  
Char. 327: 0.537-0.562 --> 0.298-0.478  
Char. 328: 0.317-0.336 --> 0.383-0.423  
Char. 330: 0.536 --> 0.338  
Char. 332: 0.450 --> 0.536-0.548  
Char. 335: 0.189 --> 0.196  
Char. 340: 0.583 --> 0.513  
Char. 341: 0.231 --> 0.166  
Char. 344: 0.411 --> 0.310-0.325  
Char. 345: 0.579-0.849 --> 0.408-0.504  
Char. 346: 0.486 --> 0.310-0.429  
Char. 348: 0.317-0.371 --> 0.266-0.303  
Char. 349: 0.259-0.383 --> 0.393-0.411  
Char. 350: 0.635-0.666 --> 0.547  
Char. 351: 0.514 --> 0.571-0.662  
Char. 358: 0.440-0.529 --> 0.542  
Char. 359: 0.417-0.508 --> 0.634-0.724  
Char. 361: 0.271-0.291 --> 0.315  
Char. 362: 0.337-0.341 --> 0.552  
Char. 363: 0.501 --> 0.724  
Char. 364: 0.492 --> 0.621-0.662  
Char. 368: 0.609 --> 0.684

Char. 370: 0.430 --> 0.447-0.545  
Char. 371: 0.330 --> 0.172  
Char. 372: 0.210 --> 0.188-0.194  
Char. 452: 0 --> 1  
Char. 468: 0 --> 1  
Char. 491: 1 --> 3  
Node 89 :  
Char. 0: 0.536 --> 0.567  
Char. 2: 0.298-0.347 --> 0.259-0.278  
Char. 3: 0.354-0.357 --> 0.257  
Char. 7: 0.281 --> 0.147-0.177  
Char. 8: 0.339-0.371 --> 0.164-0.232  
Char. 9: 0.343 --> 0.186  
Char. 10: 0.334-0.392 --> 0.205  
Char. 24: 0.355-0.362 --> 0.257  
Char. 25: 0.344-0.382 --> 0.290  
Char. 30: 0.200 --> 0.197  
Char. 32: 0.452-0.462 --> 0.448  
Char. 34: 0.370-0.399 --> 0.353  
Char. 44: 0.386-0.407 --> 0.432  
Char. 48: 0.524 --> 0.489  
Char. 49: 0.431-0.567 --> 0.418-0.430  
Char. 51: 0.693-0.698 --> 0.660-0.680  
Char. 61: 0.461-0.503 --> 0.637  
Char. 63: 0.518-0.540 --> 0.692  
Char. 64: 0.207 --> 0.154  
Char. 71: 0.540 --> 0.548  
Char. 72: 0.250-0.265 --> 0.233  
Char. 75: 0.342 --> 0.341  
Char. 77: 0.283 --> 0.224  
Char. 80: 0.756 --> 0.616-0.725  
Char. 81: 0.450 --> 0.284  
Char. 88: 0.582 --> 0.611-0.703  
Char. 101: 0.543-0.592 --> 0.635-0.713  
Char. 115: 0.370-0.373 --> 0.317  
Char. 122: 0.339-0.462 --> 0.518  
Char. 123: 0.845-0.855 --> 0.887  
Char. 126: 0.566-0.604 --> 0.414  
Char. 128: 0.417-0.461 --> 0.389  
Char. 129: 0.236 --> 0.211-0.221  
Char. 135: 0.317-0.434 --> 0.442-0.529



Char. 139: 0.384-0.440 --> 0.196  
Char. 247: 0.317-0.348 --> 0.352  
Char. 339: 0.526 --> 0.581-0.599  
Char. 341: 0.252-0.255 --> 0.231  
Char. 346: 0.498 --> 0.486  
Char. 356: 0.501 --> 0.585-0.663  
Char. 363: 0.458-0.469 --> 0.501  
Char. 364: 0.359-0.388 --> 0.492  
Char. 368: 0.550-0.607 --> 0.609  
Char. 372: 0.414-0.557 --> 0.210  
Char. 406: 1 --> 0  
Char. 429: 0 --> 1  
Char. 434: 1 --> 0  
Char. 466: 1 --> 0  
Char. 503: 1 --> 0  
Char. 506: 0 --> 1  
Char. 514: 1 --> 0  
Char. 518: 1 --> 3  
Node 90 :  
Char. 19: 0.564 --> 0.512  
Char. 88: 0.783 --> 0.870  
Char. 126: 0.244 --> 0.195  
Char. 248: 0.405 --> 0.493  
Char. 341: 0.162-0.166 --> 0.216  
Char. 348: 0.266-0.303 --> 0.252  
Char. 370: 0.447-0.545 --> 0.392  
Char. 450: 1 --> 0  
Node 91 :  
Char. 88: 0.611-0.703 --> 0.783  
Char. 98: 0.581-0.695 --> 0.490-0.544  
Char. 124: 0.109-0.193 --> 0.063  
Char. 126: 0.414 --> 0.244  
Char. 129: 0.211-0.221 --> 0.322  
Char. 130: 0.620-0.630 --> 0.471  
Char. 152: 0.317-0.396 --> 0.248  
Char. 153: 0.271-0.436 --> 0.231  
Char. 156: 0.199 --> 0.156  
Char. 164: 0.428-0.486 --> 0.300  
Char. 166: 0.906 --> 0.923  
Char. 170: 0.162-0.383 --> 0.160  
Char. 173: 0.728-0.747 --> 0.703

Char. 174: 0.340-0.364 --> 0.308  
Char. 222: 0.416-0.563 --> 0.366  
Char. 223: 0.220-0.271 --> 0.308  
Char. 248: 0.256-0.348 --> 0.405  
Char. 261: 0.184-0.213 --> 0.171  
Char. 267: 0.123-0.175 --> 0.064  
Char. 277: 0.067-0.129 --> 0.015  
Char. 279: 0.227-0.323 --> 0.222  
Char. 368: 0.684-0.762 --> 0.792  
Char. 377: 0.267-0.390 --> 0.255  
Char. 381: 0.776-0.786 --> 0.764  
Char. 382: 0.567-0.676 --> 0.370  
Char. 385: 0.713-0.773 --> 0.788  
Char. 392: 0.616-0.648 --> 0.552  
Char. 399: 0.259-0.339 --> 0.158  
Char. 402: 0 --> 1  
Char. 540: 1 --> 0  
Char. 577: 0 --> 1  
Char. 578: 1 --> 0  
Char. 605: 2 --> 3  
Char. 613: 1 --> 0  
Char. 616: 2 --> 1  
Node 92 :  
Char. 5: 0.343 --> 0.366  
Char. 20: 0.725-0.744 --> 0.757  
Char. 23: 0.774-0.810 --> 0.756  
Char. 50: 0.632-0.659 --> 0.600  
Char. 53: 0.433-0.446 --> 0.457  
Char. 62: 0.427 --> 0.455  
Char. 79: 0.227-0.237 --> 0.180  
Char. 92: 0.303-0.358 --> 0.362  
Char. 107: 0.280-0.339 --> 0.427  
Char. 321: 0.739-0.789 --> 0.816  
Char. 334: 0.198-0.199 --> 0.205  
Char. 404: 0 --> 1  
Node 93 :  
Char. 1: 0.417-0.497 --> 0.766  
Char. 2: 0.367-0.461 --> 0.752  
Char. 3: 0.349-0.354 --> 0.795  
Char. 4: 0.302-0.420 --> 0.615  
Char. 7: 0.359 --> 0.363

Char. 9: 0.396 --> 0.519  
Char. 11: 0.091-0.166 --> 0.534  
Char. 12: 0.391 --> 0.470  
Char. 13: 0.347-0.352 --> 0.400  
Char. 17: 0.344-0.599 --> 0.657  
Char. 20: 0.806 --> 0.830-0.868  
Char. 23: 0.823 --> 0.864  
Char. 24: 0.355-0.389 --> 0.606  
Char. 25: 0.344-0.398 --> 0.604  
Char. 26: 0.536 --> 0.599  
Char. 28: 0.478-0.574 --> 0.461  
Char. 29: 0.496 --> 0.531  
Char. 30: 0.431-0.522 --> 0.525  
Char. 35: 0.575-0.605 --> 0.623  
Char. 37: 0.326-0.465 --> 0.581  
Char. 47: 0.595-0.702 --> 0.802  
Char. 48: 0.537 --> 0.766  
Char. 51: 0.693-0.716 --> 0.806  
Char. 52: 0.562-0.589 --> 0.785  
Char. 53: 0.460 --> 0.642  
Char. 61: 0.241 --> 0.211  
Char. 63: 0.400 --> 0.303  
Char. 64: 0.277 --> 0.335  
Char. 75: 0.311-0.346 --> 0.369  
Char. 77: 0.333-0.499 --> 0.531  
Char. 78: 0.167-0.451 --> 0.467  
Char. 80: 0.756-0.769 --> 0.782  
Char. 81: 0.450-0.474 --> 0.792  
Char. 85: 0.522 --> 0.618  
Char. 86: 0.653-0.654 --> 0.715  
Char. 87: 0.596 --> 0.617  
Char. 91: 0.409 --> 0.558  
Char. 94: 0.316 --> 0.400  
Char. 95: 0.381 --> 0.467  
Char. 100: 0.200-0.213 --> 0.167-0.172  
Char. 102: 0.459-0.514 --> 0.350  
Char. 106: 0.439-0.468 --> 0.380  
Char. 108: 0.353-0.359 --> 0.693  
Char. 110: 0.552 --> 0.595-0.867  
Char. 111: 0.329 --> 0.335-0.503  
Char. 114: 0.250-0.373 --> 0.512-0.517

Char. 115: 0.370 --> 0.560  
Char. 116: 0.333-0.380 --> 0.396  
Char. 118: 0.356-0.570 --> 0.588  
Char. 119: 0.377-0.546 --> 0.678  
Char. 120: 0.433-0.539 --> 0.710  
Char. 121: 0.268 --> 0.335  
Char. 123: 0.787 --> 0.784  
Char. 137: 0.313-0.334 --> 0.586  
Char. 335: 0.210 --> 0.186  
Char. 336: 0.173-0.219 --> 0.231  
Char. 337: 0.257 --> 0.388  
Char. 338: 0.363-0.366 --> 0.282-0.361  
Char. 339: 0.336 --> 0.276  
Char. 350: 0.283 --> 0.226  
Char. 355: 0.240 --> 0.070  
Char. 360: 0.167-0.331 --> 0.338  
Char. 364: 0.359 --> 0.260  
Char. 369: 0.284 --> 0.340  
Char. 494: 1 --> 2  
Char. 517: 0 --> 1  
Char. 522: 0 --> 1  
Node 94 :  
Char. 12: 0.325-0.351 --> 0.391  
Char. 26: 0.457 --> 0.536  
Char. 48: 0.524 --> 0.537  
Char. 50: 0.632-0.736 --> 0.544-0.547  
Char. 58: 0.606-0.698 --> 0.566-0.602  
Char. 59: 0.536-0.706 --> 0.516-0.528  
Char. 61: 0.461 --> 0.241  
Char. 63: 0.518-0.540 --> 0.400  
Char. 68: 0.344 --> 0.519-0.531  
Char. 85: 0.462 --> 0.522  
Char. 87: 0.502-0.566 --> 0.596  
Char. 89: 0.461 --> 0.637  
Char. 92: 0.427-0.429 --> 0.514  
Char. 94: 0.108-0.196 --> 0.316  
Char. 95: 0.339 --> 0.381  
Char. 96: 0.266-0.280 --> 0.352-0.409  
Char. 101: 0.558-0.592 --> 0.632-0.711  
Char. 104: 0.618-0.718 --> 0.759-0.835  
Char. 107: 0.388-0.408 --> 0.512-0.867

Char. 109: 0.517-0.654 --> 0.679  
Char. 110: 0.408-0.492 --> 0.552  
Char. 126: 0.451-0.571 --> 0.440  
Char. 139: 0.384-0.440 --> 0.208-0.361  
Char. 216: 0.406-0.466 --> 0.318  
Char. 240: 0.583 --> 0.500  
Char. 332: 0.423 --> 0.417  
Char. 334: 0.139-0.172 --> 0.212-0.243  
Char. 339: 0.526 --> 0.336  
Char. 354: 0.292 --> 0.230  
Char. 355: 0.276-0.300 --> 0.240  
Char. 358: 0.376 --> 0.269-0.270  
Char. 406: 1 --> 0  
Char. 409: 0 --> 1  
Char. 430: 0 --> 1  
Char. 452: 0 --> 1  
Char. 453: 1 --> 2  
Char. 467: 1 --> 0  
Char. 484: 1 --> 0  
Char. 493: 2 --> 0  
Char. 502: 2 --> 3  
Char. 511: 0 --> 1  
Node 95 :  
Char. 0: 0.522-0.666 --> 0.476  
Char. 91: 0.558 --> 0.678  
Char. 96: 0.352-0.409 --> 0.441  
Char. 105: 0.282-0.315 --> 0.276  
Char. 117: 0.524-0.543 --> 0.642  
Char. 347: 0.132-0.151 --> 0.063  
Char. 348: 0.317-0.402 --> 0.167  
Char. 353: 0.302-0.591 --> 0.227  
Char. 401: 0 --> 1  
Char. 402: 0 --> 1  
Char. 404: 0 --> 2  
Char. 416: 0 --> 2  
Char. 446: 1 --> 2  
Char. 459: 0 --> 1  
Node 96 :  
Char. 142: 0.382-0.419 --> 0.339  
Char. 146: 0.470-0.594 --> 0.364  
Char. 157: 0.548-0.549 --> 0.341

Char. 158: 0.527-0.594 --> 0.482  
Char. 159: 0.582-0.616 --> 0.466  
Char. 160: 0.715 --> 0.618  
Char. 161: 0.658 --> 0.632  
Char. 162: 0.820-0.931 --> 0.947  
Char. 180: 0.446-0.566 --> 0.574  
Char. 188: 0.339-0.414 --> 0.328  
Char. 273: 0.619-0.623 --> 0.539  
Char. 292: 0.388-0.491 --> 0.558  
Char. 302: 0.833 --> 0.875  
Char. 381: 0.824 --> 0.879  
Char. 391: 0.506-0.542 --> 0.612  
Char. 395: 0.247-0.330 --> 0.200  
Char. 396: 0.395 --> 0.216  
Char. 398: 0.129-0.151 --> 0.127  
Char. 528: 1 --> 0  
Char. 538: 2 --> 0  
Char. 540: 1 --> 2  
Char. 547: 1 --> 2  
Char. 562: 0 --> 2  
Char. 584: 0 --> 1  
Char. 617: 2 --> 1  
Char. 618: 1 --> 2  
Node 97 :  
Char. 1: 0.491-0.569 --> 0.624  
Char. 3: 0.608-0.637 --> 0.757  
Char. 4: 0.453-0.574 --> 0.580  
Char. 42: 0.425 --> 0.464  
Char. 43: 0.295 --> 0.396  
Char. 60: 0.697-0.714 --> 0.648  
Char. 65: 0.524-0.559 --> 0.744  
Char. 87: 0.555-0.613 --> 0.660  
Char. 89: 0.720-0.723 --> 0.796  
Char. 99: 0.666 --> 0.782  
Char. 100: 0.302 --> 0.347  
Char. 101: 0.506-0.592 --> 0.694  
Char. 103: 0.371-0.456 --> 0.480  
Char. 104: 0.618-0.718 --> 0.809  
Char. 109: 0.649-0.705 --> 0.709  
Char. 114: 0.707 --> 0.735  
Char. 125: 0.171-0.245 --> 0.249

Char. 128: 0.407-0.562 --> 0.610  
Char. 131: 0.386 --> 0.468  
Char. 135: 0.434 --> 0.454  
Char. 137: 0.657-0.754 --> 0.654  
Char. 139: 0.404-0.647 --> 0.326  
Char. 333: 0.417-0.445 --> 0.280  
Char. 340: 0.449-0.579 --> 0.788  
Char. 344: 0.387 --> 0.265  
Char. 358: 0.541 --> 0.619  
Char. 365: 0.583 --> 0.783  
Char. 366: 0.265-0.346 --> 0.347  
Char. 368: 0.550-0.607 --> 0.639  
Char. 369: 0.554-0.668 --> 0.469  
Char. 371: 0.425-0.621 --> 0.308  
Char. 372: 0.414-0.655 --> 0.305  
Char. 405: 0 --> 1  
Char. 419: 1 --> 0  
Char. 450: 1 --> 0  
Char. 456: 0 --> 1  
Char. 457: 0 --> 3  
Char. 458: 1 --> 0  
Char. 459: 0 --> 1  
Char. 468: 0 --> 1  
Char. 511: 0 --> 1  
Char. 522: 1 --> 0  
Node 98 :  
Char. 32: 0.452-0.478 --> 0.549  
Char. 36: 0.600 --> 0.638-0.803  
Char. 41: 0.332 --> 0.360-0.430  
Char. 45: 0.593 --> 0.681-0.687  
Char. 49: 0.675-0.732 --> 0.764-0.816  
Char. 85: 0.570-0.580 --> 0.732-0.748  
Char. 86: 0.597-0.606 --> 0.796-0.801  
Char. 89: 0.577-0.596 --> 0.720-0.723  
Char. 90: 0.559-0.605 --> 0.772-0.784  
Char. 91: 0.559-0.612 --> 0.675-0.823  
Char. 95: 0.503 --> 0.518-0.620  
Char. 113: 0.693-0.774 --> 0.805-0.807  
Char. 114: 0.516-0.680 --> 0.707  
Char. 117: 0.610-0.631 --> 0.797-0.858  
Char. 121: 0.403-0.572 --> 0.614-0.645

Char. 122: 0.447-0.462 --> 0.589-0.649  
Char. 127: 0.522-0.525 --> 0.663-0.753  
Char. 131: 0.309-0.357 --> 0.386  
Char. 338: 0.363-0.366 --> 0.382-0.399  
Char. 344: 0.411-0.545 --> 0.387  
Char. 346: 0.627-0.716 --> 0.745-0.777  
Char. 347: 0.122 --> 0.074-0.100  
Char. 348: 0.317-0.324 --> 0.176-0.271  
Char. 358: 0.294-0.380 --> 0.541  
Char. 360: 0.566-0.591 --> 0.743-0.750  
Char. 362: 0.381-0.416 --> 0.425-0.628  
Char. 363: 0.458-0.469 --> 0.473-0.741  
Char. 364: 0.386-0.388 --> 0.480-0.618  
Char. 406: 1 --> 0  
Char. 427: 0 --> 1  
Char. 428: 0 --> 1  
Char. 453: 1 --> 2  
Char. 508: 0 --> 1  
Node 99 :  
Char. 7: 0.383-0.415 --> 0.365  
Char. 65: 0.524-0.559 --> 0.395  
Char. 77: 0.579-0.608 --> 0.501  
Char. 137: 0.657-0.754 --> 0.881  
Char. 325: 0.341-0.370 --> 0.533  
Char. 369: 0.554-0.668 --> 0.946  
Char. 370: 0.502-0.596 --> 0.800  
Char. 421: 1 --> 0  
Char. 469: 0 --> 2  
Char. 478: 1 --> 0  
Node 100 :  
Char. 2: 0.520 --> 0.487  
Char. 20: 0.824 --> 0.769  
Char. 45: 0.681-0.687 --> 0.715  
Char. 46: 0.563 --> 0.691  
Char. 50: 0.592 --> 0.627  
Char. 58: 0.523-0.566 --> 0.590  
Char. 59: 0.520 --> 0.560  
Char. 62: 0.486-0.541 --> 0.399  
Char. 87: 0.555-0.613 --> 0.515  
Char. 88: 0.587 --> 0.523  
Char. 93: 0.571-0.614 --> 0.493

Char. 126: 0.424-0.434 --> 0.459  
Char. 337: 0.299 --> 0.243  
Char. 338: 0.382-0.399 --> 0.517  
Char. 520: 1 --> 2

Node 101 :

Char. 22: 0.642-0.675 --> 0.482  
Char. 56: 0.242-0.276 --> 0.225  
Char. 90: 0.559-0.605 --> 0.508  
Char. 92: 0.503-0.534 --> 0.540  
Char. 95: 0.503 --> 0.475  
Char. 96: 0.414-0.467 --> 0.383  
Char. 98: 0.456-0.523 --> 0.445  
Char. 105: 0.475-0.481 --> 0.398  
Char. 106: 0.576-0.815 --> 0.510  
Char. 107: 0.572 --> 0.344  
Char. 108: 0.667-0.677 --> 0.563  
Char. 109: 0.567-0.661 --> 0.478  
Char. 110: 0.773-0.801 --> 0.743  
Char. 114: 0.516-0.680 --> 0.466  
Char. 125: 0.159-0.245 --> 0.264  
Char. 133: 0.488-0.541 --> 0.437  
Char. 326: 0.380-0.491 --> 0.564  
Char. 333: 0.445-0.549 --> 0.814  
Char. 347: 0.122 --> 0.132  
Char. 355: 0.411-0.476 --> 0.377  
Char. 360: 0.566 --> 0.499  
Char. 413: 1 --> 0  
Char. 414: 0 --> 2  
Char. 429: 0 --> 1  
Char. 430: 0 --> 1  
Char. 439: 0 --> 1  
Char. 462: 2 --> 1  
Char. 463: 1 --> 0  
Char. 469: 0 --> 2

Node 102 :

Char. 24: 0.592-0.597 --> 0.618  
Char. 25: 0.535-0.570 --> 0.593-0.608  
Char. 32: 0.452-0.478 --> 0.199-0.200  
Char. 41: 0.332 --> 0.257-0.318  
Char. 42: 0.425 --> 0.394-0.397  
Char. 54: 0.598-0.634 --> 0.650-0.745

Char. 60: 0.697-0.714 --> 0.729-0.736  
Char. 71: 0.474-0.482 --> 0.332  
Char. 72: 0.317-0.328 --> 0.345  
Char. 73: 0.272-0.289 --> 0.190-0.256  
Char. 78: 0.451-0.456 --> 0.438  
Char. 85: 0.570-0.580 --> 0.487-0.537  
Char. 86: 0.597-0.606 --> 0.519-0.560  
Char. 89: 0.537-0.596 --> 0.465-0.476  
Char. 99: 0.587-0.666 --> 0.541  
Char. 116: 0.358 --> 0.317  
Char. 135: 0.398-0.434 --> 0.069-0.118  
Char. 192: 0.558-0.566 --> 0.546  
Char. 208: 0.538-0.589 --> 0.307  
Char. 228: 0.265-0.330 --> 0.446-0.458  
Char. 231: 0.300-0.400 --> 0.266  
Char. 241: 0.400-0.500 --> 0.266-0.300  
Char. 291: 0.555-0.579 --> 0.734  
Char. 300: 0.636-0.655 --> 0.702  
Char. 302: 0.833 --> 0.750  
Char. 304: 0.285-0.381 --> 0.142  
Char. 331: 0.253-0.302 --> 0.186  
Char. 343: 0.162-0.210 --> 0.145  
Char. 345: 0.668-0.732 --> 0.434-0.533  
Char. 349: 0.437 --> 0.448-0.497  
Char. 350: 0.635-0.725 --> 0.487  
Char. 368: 0.550-0.607 --> 0.075-0.156  
Char. 440: 1 --> 0  
Char. 443: 0 --> 1  
Char. 459: 0 --> 1  
Char. 491: 1 --> 0  
Char. 498: 1 --> 2  
Char. 499: 1 --> 0  
Char. 517: 1 --> 0  
Char. 525: 1 --> 0  
Char. 592: 0 --> 1  
Char. 593: 0 --> 1  
Char. 631: 1 --> 2  
Node 103 :  
Char. 1: 0.491-0.569 --> 0.572  
Char. 8: 0.442 --> 0.456  
Char. 15: 0.584-0.606 --> 0.794

Char. 16: 0.657-0.752 --> 0.857  
Char. 17: 0.634-0.641 --> 0.798  
Char. 18: 0.622-0.675 --> 0.852  
Char. 24: 0.618 --> 0.667  
Char. 26: 0.547-0.550 --> 0.771  
Char. 31: 0.555-0.595 --> 0.620  
Char. 33: 0.402-0.420 --> 0.235  
Char. 34: 0.624-0.671 --> 0.827  
Char. 37: 0.591 --> 0.613  
Char. 47: 0.513-0.644 --> 0.735  
Char. 48: 0.614-0.682 --> 0.928  
Char. 54: 0.650-0.745 --> 0.760  
Char. 60: 0.729-0.736 --> 0.791  
Char. 64: 0.542-0.575 --> 0.594  
Char. 65: 0.559 --> 0.608  
Char. 67: 0.339-0.446 --> 0.538  
Char. 68: 0.609-0.640 --> 0.649  
Char. 71: 0.332 --> 0.279  
Char. 72: 0.345 --> 0.377  
Char. 79: 0.370-0.427 --> 0.343  
Char. 92: 0.503-0.534 --> 0.496  
Char. 231: 0.266 --> 0.100  
Char. 238: 0.317-0.335 --> 0.380  
Char. 239: 0.400-0.600 --> 0.300  
Char. 244: 0.000 --> 0.500  
Char. 320: 0.480-0.484 --> 0.531  
Char. 324: 0.549-0.601 --> 0.652  
Char. 330: 0.593-0.596 --> 0.485  
Char. 331: 0.186 --> 0.158  
Char. 332: 0.294-0.382 --> 0.269  
Char. 335: 0.140-0.257 --> 0.128  
Char. 341: 0.298-0.469 --> 0.550  
Char. 345: 0.434-0.533 --> 0.428  
Char. 346: 0.627-0.628 --> 0.431  
Char. 347: 0.122 --> 0.071  
Char. 348: 0.317-0.331 --> 0.222  
Char. 370: 0.477 --> 0.350  
Char. 405: 0 --> 1  
Char. 461: 0 --> 1  
Char. 466: 0 --> 1  
Char. 473: 2 --> 1

Node 104 :  
Char. 5: 0.571 --> 0.637  
Char. 6: 0.348-0.371 --> 0.396  
Char. 7: 0.471-0.484 --> 0.560  
Char. 8: 0.435-0.442 --> 0.506  
Char. 9: 0.584 --> 0.701  
Char. 10: 0.497-0.503 --> 0.593  
Char. 20: 0.824-0.827 --> 0.867  
Char. 22: 0.642-0.675 --> 0.798  
Char. 23: 0.745-0.811 --> 0.856  
Char. 37: 0.558-0.581 --> 0.526  
Char. 46: 0.479-0.563 --> 0.625  
Char. 69: 0.441-0.473 --> 0.492  
Char. 73: 0.272-0.289 --> 0.488  
Char. 75: 0.397-0.402 --> 0.621  
Char. 98: 0.460-0.523 --> 0.531  
Char. 137: 0.657-0.689 --> 0.552  
Char. 341: 0.252-0.334 --> 0.242  
Char. 342: 0.233-0.299 --> 0.217  
Char. 346: 0.627-0.659 --> 0.476  
Char. 348: 0.317-0.331 --> 0.374  
Char. 369: 0.554-0.580 --> 0.432  
Char. 370: 0.477 --> 0.364  
Char. 404: 2 --> 0  
Char. 409: 0 --> 1  
Char. 422: 2 --> 0  
Char. 489: 0 --> 1  
Char. 505: 1 --> 0  
Node 105 :  
Char. 4: 0.547 --> 0.569  
Char. 7: 0.440-0.484 --> 0.678  
Char. 8: 0.444 --> 0.647  
Char. 9: 0.579-0.584 --> 0.719  
Char. 10: 0.497-0.581 --> 0.802  
Char. 15: 0.495-0.606 --> 0.684  
Char. 17: 0.541-0.641 --> 0.715  
Char. 19: 0.304-0.365 --> 0.246  
Char. 20: 0.344 --> 0.335  
Char. 22: 0.642-0.675 --> 0.485  
Char. 24: 0.484-0.597 --> 0.627  
Char. 25: 0.443-0.570 --> 0.641

Char. 26: 0.547-0.562 --> 0.454  
Char. 29: 0.338-0.501 --> 0.578  
Char. 34: 0.671 --> 0.811  
Char. 38: 0.603 --> 0.625  
Char. 40: 0.580-0.600 --> 0.506  
Char. 41: 0.496 --> 0.382  
Char. 45: 0.513-0.593 --> 0.650  
Char. 47: 0.513 --> 0.299  
Char. 48: 0.682 --> 0.480  
Char. 50: 0.471 --> 0.526  
Char. 52: 0.437 --> 0.365  
Char. 54: 0.598 --> 0.519  
Char. 61: 0.325-0.384 --> 0.472  
Char. 63: 0.331-0.408 --> 0.479  
Char. 64: 0.575 --> 0.601  
Char. 67: 0.496-0.503 --> 0.521  
Char. 68: 0.640 --> 0.653  
Char. 73: 0.272-0.289 --> 0.313  
Char. 76: 0.496 --> 0.543  
Char. 79: 0.397 --> 0.517  
Char. 81: 0.475 --> 0.417  
Char. 84: 0.483 --> 0.556  
Char. 94: 0.417-0.480 --> 0.674  
Char. 95: 0.503 --> 0.688  
Char. 96: 0.414-0.467 --> 0.682  
Char. 97: 0.324-0.445 --> 0.674  
Char. 99: 0.616-0.749 --> 0.764  
Char. 100: 0.289-0.477 --> 0.581  
Char. 102: 0.112-0.257 --> 0.111  
Char. 103: 0.371-0.456 --> 0.562  
Char. 114: 0.680 --> 0.736  
Char. 115: 0.702 --> 0.779  
Char. 116: 0.358 --> 0.648  
Char. 117: 0.593-0.631 --> 0.690  
Char. 119: 0.716-0.723 --> 0.780  
Char. 120: 0.864 --> 0.877  
Char. 121: 0.577 --> 0.750  
Char. 128: 0.550-0.562 --> 0.513  
Char. 131: 0.309-0.357 --> 0.673

Char. 132: 0.767-0.798 --> 0.758  
Char. 135: 0.514 --> 0.560  
Char. 137: 0.534-0.689 --> 0.787  
Char. 215: 0.664 --> 0.775  
Char. 216: 0.523 --> 0.742  
Char. 220: 0.799 --> 0.846  
Char. 221: 0.741 --> 0.771  
Char. 227: 0.707 --> 0.733  
Char. 238: 0.428 --> 0.486  
Char. 239: 0.700 --> 0.766  
Char. 245: 0.634 --> 0.694  
Char. 246: 0.641 --> 0.887  
Char. 248: 0.465 --> 0.878  
Char. 250: 0.750 --> 0.833  
Char. 251: 0.833 --> 1.000  
Char. 324: 0.549-0.630 --> 0.390  
Char. 329: 0.287 --> 0.324  
Char. 334: 0.257-0.320 --> 0.244  
Char. 336: 0.286-0.321 --> 0.227  
Char. 337: 0.303-0.357 --> 0.224  
Char. 338: 0.363-0.445 --> 0.461  
Char. 339: 0.301-0.412 --> 0.440  
Char. 341: 0.633-0.655 --> 0.700  
Char. 344: 0.552-0.664 --> 0.785  
Char. 345: 0.738-0.739 --> 0.721  
Char. 349: 0.437 --> 0.550  
Char. 352: 0.362-0.434 --> 0.565  
Char. 365: 0.271 --> 0.128  
Char. 366: 0.265-0.346 --> 0.413  
Char. 367: 0.910-0.931 --> 0.697  
Char. 369: 0.596 --> 0.690  
Char. 370: 0.512 --> 0.558  
Char. 404: 0 --> 1  
Char. 422: 1 --> 0  
Char. 443: 0 --> 1  
Char. 444: 3 --> 0  
Char. 451: 1 --> 0  
Char. 473: 2 --> 1  
Char. 510: 1 --> 2

**Appendix 8. Data matrix in NEXUS format for Bayesian tip-dating analyses**

#NEXUS

BEGIN DATA;

DIMENSIONS NTAX = 55 NCHAR = 634;

FORMAT DATATYPE = STANDARD GAP = - MISSING = ? SYMBOLS = "0 1 2 3 4 5";

MATRIX

Habilis\_OH7\_OH24\_ER1805 10020?00100000200020001000??0000010100101200300011110{0  
2}1?01100021000000?{0 1 2 3}121{0 1 2 3}00{0 1}00000001020010?011{1 2}110111010001110001{1  
2}1000111110000000?0?????10{1 2}211200??1?????????{0  
3}0?????????????002210101?0000010001010001100{0  
1}1000000201001010010020002011114522210011232222?532232213332312234433211444204234251013131221  
2234341412442442?1331133111212223111112323343334223443243042322243?31235????????????1??4?54??325  
??14?534334231011535445353523300202300120000350012?4332234432145414420324422335052331234420252  
01555152455323552305515244125143442353232431455320????????????303?5224113221515311231125?12132  
1?3233145133211533355?????1??????343233112322115

Antecessor

101210?0201000100??1012?20111101110000110211222001100100001????????????????????????????????????  
?????????1?????????????1?????????????101?1?1012111102120210022{0  
1}000201010122010101120000100120001{0 1}00{1  
2}11101211122232012120121200100100012???1?????????????4434??3??????????00?????????????????0??  
?????????????????????233?2422101103013213132232200222333110113?????121001??3?0010033004?000010102  
14315500111131301131111112?????2201552?4404335312203223113232113212401003232231100????000000??  
??5??1?25?440?445?235?422120??1220040?3220150?????????????441?23?????0?????????????2010?02112  
1522?1111?240??54?24?04354?21?334223535412?

Narmada

20000?00202021?1212101??2010000????????????????????????????????20020110000?213?11000111??1010001121112  
200130111101101111211001??22????????????????????????????????????????????????????????????????  
?????????????????????????????????????3333?32??1122??4444243343352?31123455313322254454323312?443222  
2442212211321311?23??232233341?1??3?????????444?????????????3?????????42????????????????????  
????????????????????????????????????????????????????????????????????????????????????????  
?????????????????????????????????????????????????????????????3443412?1222230101234100?33031?????2?????????33  
????????????????????????????????

Eliye\_Springs

1?02??{1

2}02000????002101202011100001110111?20???1?10?????00000121011110?2122101111111102122021112110  
1211101112011002?1011?120????????????????????????????????????????????????????????????????  
?????????????????????????????????3221143??22011134341423322242353?533213313334342444322341442213143  
2212422412213424?2??23?????1??????3243?33?1?????????????3213?????13????????????????????  
????????????????????????????????????????????????????????????????????????????????????  
?????????????????????????????????????????????????????????????34342125122121111234210?22?????????????1?????????10????  
????????????????????????????



Ndutu

10020?3020001??0??1100?00??000011111?0?10?2?0101????0?10001101111212100100101111010000211221  
22210101010000201110211011?120????????????????????????????????????????????????????????????????  
????????????????????????????????????????2112311??3332222223?24222321123212131????332225334231233?3  
13231122010213?0?34242022002?22????23?4????22??312300?2000135??52331?????240?????????????????  
????????????????????????????????????????????????????????????????????????????????????????????  
????????????????????????????????????????????????????????????????????????????????????????????  
????3200????????????????????????????

Irhoud\_1\_2

1{0 1}0{0 2}{0 1 2}0101010111{0 1}{0 1}01{1 2}01{0 1}0{2

3}110000001110012011142100100010?011000{1 2}21{0 1}{0 1}100?21001{0 1}01011011110{0 1}{0  
1}1210112211012{0 1}110??102?1{0 1}201{1 2}{1 2 3}{0  
1}?021111211121221110010000110112221112????211??0102200100111200001100???0????????????????12?1112  
2?0012?00100201023112122??22122322234445222312112223322213334323440122013342333211011?????42  
221134?233322332?21133233??1331223332232232241123422?31?213?251?43??3??10343?3344430?345243333  
3344434111223434????????????????????31?????22????22????1334000??21244000??32?????1131531041331224  
222212213222200132221200203212300100????????????244133212333220200132043?4212133?1022222211224  
?42332211??015553005?223131314522?

Florisbad

11122130112101100011021030100000011100220111?21001?001010?1010????011????????????????????????  
??????????????????????1??1?1????????????????????????????????????????????????????????????????  
????????????????????????????????3????3????????????5545????????????22122????????????3?????????  
????????????334433122?2????????22442134????????13322?32??2??1????????????????????????????  
????????????????????????????????????????????????????????????????????????????????????????  
????????????????????????????????????542????????1????????????3132????110????????????????????  
????????????????

Omo\_II

1112212111210??0111212103011100????????????????????20110101101030113101011011101122121122  
11012011011110211020211??2????????????????????????????????????????????????????????????  
????????????????????????????????4332?32??34?3??122134?3411223?22232341?232223443253543143?443222  
2113441211122212?341?00120?112????5????????????????????3????????22????????????????  
????????????????????????????????????????????????????????????????????????????????????  
????????????????????????????????????0443332??42311212221322?0022????????????????12?  
????????????????

LH\_18

111220201121011100110210301??11001110012?10??2100110010?01100022101110?20110??11111??10100231011  
21110120110111102110112231??21????????????????????????????????????????????????????????  
?????0?2??211?1????????????????3333432220????121134?331121??01212441?331212533244?22????334?  
2?2112211322242224?2??2??2?2?2?2232?4212122??4222112212212421??????1?2?230????????????  
????????????????????????????????????????????????????????1021??????2133400001??????001122????00????  
????????????????????????????????????????????????????????0433311??133312?13?1132?221??12222?22112  
32??31200????????????????????

Skhul\_V\_IX 1112{1 2}{1 2}{0 1}{1 2}121{0 1}12{0  
1}00120100311001100111001211103?21011????110000???01{1 2}{0 1}{0 1  
2}0211011010110101100012121122110120110111202110112231?02122222200111210001101212101000012211  
1210111112210011110201011100000000000100002000310301202011120?0?10100013101123223401322112532  
4411212322231341122144443223443232435413130452231311311211322?111121111122232?3???111223?23122  
3112134??4035003?02112311454143222322233444553432043233231455441000032030220210001012410020210  
1202002001011000112100002011120000113112001220120200110000201122121012223001021222101032220001  
00???????????33424112234241121114512123112233?2212?1222233?0332233052324424335?3231423102550

Qafzeh\_IX  
11122?1101210120001212103110?11001110012001122100112110101100012000101010200??10110101101112101  
12211212011011110211020221???222221211000?0210001101111021000002211222010111110000011202110100  
1100001002111013110311101112011120001101010140110230111?1??00014341300110?21230340?221334523335  
3103054452515122000?3?1?11211400??013401001011431132131??1222?211131221341113114131211122202322  
331133112243333430352333302334442222323212022102332302023123122421120011201131124150020112  
31200110215152022315420422323241230222113234222212305233332342425134?????????1454422???53420  
110353011?2252323112?22332244331322221243134232322?1201335343111

Mladedc\_I\_II\_V\_VI {1 2}11220{1 2 3}101210120{0 1}002{0 1}2{0  
1}03110?110011100120110321101021211100{0 1}{0 1}01{2 3}001{1 2}{0 1}10{1 2 3}0{1 2}{0 1 2}{0 1}{1 0  
1}1011{1 2}1111{0 1}{0 1}2{0 1}221{0 2}{1 2}12211{0 1}1201101111021102{0 1}2{0 1 2}{1  
3}1?122?????????????????????????????????????????????????????????????????????????????????????  
????????????4111213122311211111334341111132221133122214453221345322432551314211223131242222323?  
01122101120013310330501101101211120110442131222100120221?????????????????????????????????????????  
?????????????????????????????????????????????????????????????????????????????????????????  
?????????????????????????????????????????????????????????????????????????????????????????  
????????????????????332????????2342310233423211221322212132212101211131244312042312??????????  
???????????????????

Cro\_Magnon\_I\_II\_III 11122{0 1}{1 2}101210120001202{0 1}0311??110011100220111421101{0  
1}{0 2}0{0 1}0103{0 1}{0 1}{0 1}01{2 3}0{0 1}11{0 1}{0 1}2{0 1}210?01011{1 2}1111111212{1  
2}1221101201101111021102122310122222202000?1210002101110021?2110????22?1?????1010011120000010  
0??????????????{2  
3}???311?1??2???2??????0??511113422230132111243433001113322214512321555442134432322344131432  
12220312414211423?0112211111010141032041212200121012211024203121332331114022??1?????55200?23034  
53?244?000004202235111100224????????????????????????????????????????223?000??51230000?????????????  
?????????????????????????????????????????????????????????????????????????????????????????  
12223532101141??1502443?4?4455524355004

Oase\_1\_2  
1112201101210120?0121200301??10001110012011122200111010?01100000?01110?10000??1011111001110121  
122111120110111102110112230?12022222210101211002211210121211122101120111002200000110100010000  
??????????????????2??21120???2?????200120202041111232323?1??0100333130011??10201441?32122344213442  
231324434142211220312222102412??1134110010112310431412112211211131221442011122221122213434335  
5320343223233334422440211243333450000010321????????????????????????????????????????322431000311323200

02202235050????????????????????????????????22320102122220103431532325????????????0455422??534313113421  
31?22322122222213422554233323113225224343330?2343425333002

ZKD\_UC\_101\_103 111220{2 3}111210120001212{0 1}031???{0  
1}1001111022011122100110010?0210001200111{2 3}{0 1}2121{1 2 3}11101111110111212{1  
2}122110120110111102110{1 2}122{1 3}10122222222001202110001012110222{1  
2}2102211121011100220101011210101000000000000?1??00{2  
3}??03113111?2012120??20102023112212111222321113444411212411221441222133443324442322235433142  
423331212322221413?122232112212125104304111222123111312213421312224323122213222133244354202233  
444442354011124132235011011023202325?0020005?002143?1200042??0041??212331000114123000001512100  
00??????????2142?0141?1121?114????011321?100113310100????????????144142034433440211344222132232  
22022121222233314322311403414434335123543355434112

Liujiang

111221310121012000121200310??21001111012011122100110010?02101013001110?10210??1011111111112121  
1211101201101111021102122310122????????????????????????????????????????????????????????????000000  
0101100002000311?3????????????????????400023412121101111534340011132120034002214444322203211230  
442415132223221131211212?00022001110102500430402100111200001110243032222121201120?????????????  
????????????????????????????????????13323505112245021142101?1123001122002154100350152331000???????  
????????????????????????????????????????????????????????????????????????????235331033442411311244242121223121  
01321331033243312201????????????????????????????????

SH4\_5

20000?102010212110110011201??00{0 1}{0

1}01011011000?2111010020002010010211100?312110012110111102102101022210001010010111111112301121  
00101101011121102021112230122110220000111000022000001100100000100??0??????????1??0??002211122  
21?????0??312222212222121243344334222203114522222211123233333225041334212122110333252212343  
2?23233332312221232232354222353223444421412343133332221314222144112133031344455303421243242  
4432322211133003424?0????????????????????????????????21321?000004012?000111220?000?????????????002  
43002210041??00134??1?31144?0?0????????????34423113233523111333123353132432?3433334101153423  
2444314344344430?3231354211010

Tabun\_1

20000?00201021010011002120100201100011??????20?1000120?0?100010200110?{2  
3}11010013111??10000230{0 2}2112210120111011211101213221?020100000000{0 1}212111{0  
1}00001223002210122112010010102100000111212110010010001000010111201130031122211222110110102013  
1111010111????222234?452224?0012222?133232322323?22????332?2?103111051432?1?15?20?1222?2212??  
?2214314?5??23432114222234??35313?????411210004224331222200211144334?222234244334111113021013  
304305332341052141354?112200113100211141000112112200011211000001134232255421250111520152300220  
102112410103113412025042????????3350354??342211?12?21??3101?332??5?34332233????511505320534  
33?232332334212211

Tabun\_2

????????????????????????????????????????????????????????????????????????????????????

????????????????????????????????????????????????????????????2222111110100{0  
1}202112222021211022111210110101200010111200001100????????????????????????????12?2112?21??00?0101????  
????????????????????????????????????????????????????????????????????????????????????????????????  
????????????????????????????????????122324443342121215455531352222231331232221221244????????????????





??1111?1233325??34?443334?544233323342221????????????????????????????????????????????????????????????  
????????????????????????????????????42050032233350153????????????????????????????????????????????????????????????  
????????????????????????????2243424?2?002?254233322

Dali 21122100210011102021012020{0

1}??01001110111021142200110120000110012111000?211100101101011010201?21122101311100001111102110  
111121????????????????????????????????????????????????????????????????????????????????????2??3??2?????????  
??????????2544342213133334345243443332333233343142143244443443152333212224333123223223324433  
1343333433222241141??1134433023333342242123213232110311????????????????????????????????????????????  
????????????????????????????????????????????????????????????????????????????????????????????????  
????????????????????????????????2443322211322111211322202201100?00013122132132312211??????????????  
???????????????

Hualongdong

21122100210011102011012020??0100111010102114221011012000001001211000????????????????????????????  
2??13111?????????02?1?1?2?111100110??0?10000??11230122200?????10?11??2200010010010000100?????  
0010??22003??31{1 2}{2 3}??2110121{1 2}01101{1  
2}1012??21????????2??2?4?3??????????3??1??23?3????????????2?2?3????????????????????32322??2  
??314??51??252?43??4??????4??????????00????????2????0??10??144?334454?5555511?1122100??????  
?024?4200??????212155?????3222430002132221000020????????????????11500?????2104121140032111140  
143004150130????????????4?1??????221??2??????01??3?11?41?3?2????????????????32??3?343?3?4?  
33333

Harbin 20020?0021001111002101102010{0

1}0100111011102014211011012000000012110000?2112100101101011111110212221013111011111110011011  
1021??????????????????????????????????????????????????????????????????????????????????????3??3?2?3??????????  
?????????344444232322134342424533321333323443243133233544255342313331312431311312322323443224  
4444433332032132142243543433323544204111431313111332????????????????????????????????????????????  
??????????????????????????????????????????????????????????????334?021005????????????????????????????  
????????????????????????????????24543113224222023114111331211131022112100042412222??????????????  
???????????????

Jinniushan

20020?002100111000210120201??11001110111021142100101120000100012101000?211210010000101101121101  
1122101311100001111102010110121????????????????????????????????????????????????????????????????021110  
000112100322031122?????????????????????322232222022512224244213331221212221232221332313012031  
42231221232321312221112122?03333332222241144142252332221212221242124114122111221?????????????  
????????????????????????????????????23331200322022002132154021220321220212031130112112400500201  
12000????????????????????????????????????????????????????????????????????????????144243211141211301222220321311  
1241112101123251221211???????????????????????????????

Maba

20020?0020001111002101202010011????????????????????????????????000111?010????????????????????????????  
??????????????????1??111????????????????????????????????????????????????????????????????????????  
?????????????????????????????322??22?????????2?3334??????????????2323324??3?13????332?1????33????  
????????????22332222?1??3??????12224?2????????????2222????????????????????????????????????????







23340200??5552553342????????????1????????????????????????????????????1512124343341123323242121  
12

Peking\_X\_XII\_XIII\_LII\_RC 0000{1 2}010200000{1  
2}021210020101001100111002101?14220010?1?1?0{1 2}0010?20002?31213010000{1 2}1001000200{0  
2}1111200121110000200001200000?120000?????101?11101000110110122112122001010010220100010121???0  
0100211000002112012112211{2  
3}00122010220001001020123332322233?3??333313?2333230?23123333?43221132334333432152241313312322  
2213122124443?23332333322223?3??23232424422232222401233221320113323555523233103555444455455  
15534455545344332324344?22211202423334003000113521230031320032253100032323310002222435000453  
253311144423435521342403452?0?0245220010454421100505?????0052434223???31242112212111?3312223?  
322311221222314133221412115344312?334221433211?

Nanjing1  
00001010200000201120000010100110011101210?012?1001????????0010?200021213230010000?0?????????  
????????????????????0????????????????????????????????????????????????????????????????????????  
????????????????????????????????????1233?10????4?4?3?3?22?32?????????12111311333213401?114232????  
?????????????23?2?222213332232?????2112233332?????????2532322242204?????????????????????????  
????????????????????????????????????????????????????????????????????????????????????????????  
????????????????????????????????????????????????????????423?3?????4121122?????23143???43123?32???2250?????  
????????????????????????

Hexian  
1112211020001100112001201010000????????????????????????????????10121021003131103010001101011002000111  
0200101000000100001200001?020????????????????????????0201?20????????????????????????1122??01??22110?  
?????0{0 1}101????????????????????0010{0  
2}0223332102232?3??454524?3333522?45115333?2212224245433234124224212343332212132?3?23322?22002  
?4232??3????????????????????????5?????????32????????????????????????????????????????????????543  
35204????????????????333400?????3323100053342131505?????????????????????????????????????????4?4  
2202??5?42005????????????4431401??201310114223??2201?????????????????????31?????????????????????  
?????

Sambungmakan\_1\_3 0000{0 1}?{0 1}021101100{1  
2}12101001010?00????????????????????????????????{0 1}00212200031311{1 2}30{0 1}000000?00011{1 2}{0 1}{0  
2}{1 2}1101111{0  
1}1000000100001210001??21????????????????????????????????????????????????????????????????  
????????????????????????????22?22333444?????333324?4433332?23223333?????2342233?23????3??2?3321  
3222121303?42?32?33?3?23?2??3????????????????????????????????????23????????????????????????  
????????????????????????????????????????????????????????????????????????????????????????  
????????????????????????????????????????3443322??312??3?2??210??42?2?????????????????????21?????  
????????????????????

Sangiran\_2\_17 000021102000110011{1 2}00110001?00001111100101120001100100031{0  
1}0121021000?211{0 1}2}300100000000002{0  
1}0?01112001210100002101112000011120????????????????????????????????????????????????????  
?????????1100002??21110?????????????????????145434232323433444423?43334332231143330431211344542434





## Appendix 9. MrBayes commands for tip-dating, with backbone partial constraints from the results of parsimony analysis

```
Begin MrBayes;
  set autoclose=yes nowarnings=yes;

  exe data.nex;

  [partitions]
  charset discrete = 1-234;
  charset continuous = 235-634;
  partition two = 2: discrete, continuous;
  set partition = two;

  [substitution model]
  ctype ordered: 5 7 9 17 20 22 23 25 30 46 47 60 63 65 66 68 70 72 74 75 76 83 89 97 98 99
    103 119 125 126 127 206 210 211 212 213 214 216 217 221 222 223 227 230 231 234-634;
  lset applyto = (all) coding = variable rates = gamma; [Mkv+G]
  prset applyto = (all) ratepr = variable;

  [relaxed clock model]
  prset clockratepr = exp(300);
  prset clockvarpr = wn;
  prset wnvarpr = exp(2);
  unlink wnvar = (all);

  [constraints]
  constraint aa1 partial =Antecessor Eliye_Springs Rabat : Ndutu Irhoud_1_2 Florisbad Omo_II LH_18
  Skhul_V_IX Qafzeh_IX Mladec_I_II_V_VI Cro_Magnon_I_II_III Oase_1_2 ZKD_UC_101_103 Liujiang
  SH4_5 Tabun_1 Tabun_2 Spy_I_II Gibraltar_1 Amud La_Chapelle_aux_Saints La_Ferrassie_1 Shanidar_1_5
  Cesaire Saccopastore_I_II Neanderthalensis_type Xiahe Dali Hualongdong Harbin Jinniushan Narmada Maba
  Xuchang Mauer_1 Arago_II_XIII_XXI_XLVII Broken_Hill Petralona_1 Ceprano Steinheim Saldanha Bodo
  Ternifine_1_2_3_4 Peking_X_XII_XIII_LII_RC Nanjing1 Hexian Sambungmacan_1_3 Sangiran_2_17
  Ngandong7_9_12 Dmanisi STW53 OH_9 Turkana_ER3733_3883 Habilis_OH7_OH24_ER1805;
  constraint aa2 partial =Xiahe Dali Hualongdong Harbin Jinniushan : Antecessor Rabat Eliye_Springs
  Ndutu Irhoud_1_2 Florisbad Omo_II LH_18 Skhul_V_IX Qafzeh_IX Mladec_I_II_V_VI
  Cro_Magnon_I_II_III Oase_1_2 ZKD_UC_101_103 Liujiang SH4_5 Tabun_1 Tabun_2 Spy_I_II Gibraltar_1
  Amud La_Chapelle_aux_Saints La_Ferrassie_1 Shanidar_1_5 Cesaire Saccopastore_I_II
  Neanderthalensis_type Narmada Maba Xuchang Mauer_1 Arago_II_XIII_XXI_XLVII Broken_Hill
  Petralona_1 Ceprano Steinheim Saldanha Bodo Ternifine_1_2_3_4 Peking_X_XII_XIII_LII_RC Nanjing1
  Hexian Sambungmacan_1_3 Sangiran_2_17 Ngandong7_9_12 Dmanisi STW53 OH_9 Turkana_ER3733_3883
  Habilis_OH7_OH24_ER1805;
```

constraint aa3 partial =Narmada Maba Xuchang : Xiahe Dali Hualongdong Harbin Jinniushan Antecessor Eliye\_Springs Rabat Nduu Irhoud\_1\_2 Florisbad Omo\_II LH\_18 Skhul\_V\_IX Qafzeh\_IX Mladec\_I\_II\_V\_VI Cro\_Magnon\_I\_II\_III Oase\_1\_2 ZKD\_UC\_101\_103 Liujiang SH4\_5 Tabun\_1 Tabun\_2 Spy\_I\_II Gibraltar\_1 Amud La\_Chapelle\_aux\_Saints La\_Ferrassie\_1 Shanidar\_1\_5 Cesaire Saccopastore\_I\_II Neanderthalensis\_type Mauer\_1 Arago\_II\_XIII\_XXI\_XLVII Broken\_Hill Petralona\_1 Ceprano Steinheim Saldanha Bodo Ternifine\_1\_2\_3\_4 Peking\_X\_XII\_XIII\_LII\_RC Nanjing1 Hexian Sambungmacan\_1\_3 Sangiran\_2\_17 Ngandong7\_9\_12 Dmanisi STW53 OH\_9 Turkana\_ER3733\_3883 Habilis\_OH7\_OH24\_ER1805;

constraint aa4 partial =Xiahe Dali Hualongdong Harbin Jinniushan Antecessor Eliye\_Springs Rabat Irhoud\_1\_2 Florisbad Omo\_II LH\_18 Skhul\_V\_IX Qafzeh\_IX Mladec\_I\_II\_V\_VI Cro\_Magnon\_I\_II\_III Oase\_1\_2 ZKD\_UC\_101\_103 Liujiang Tabun\_2 : Steinheim SH4\_5 Tabun\_1 Spy\_I\_II Gibraltar\_1 Amud La\_Chapelle\_aux\_Saints La\_Ferrassie\_1 Shanidar\_1\_5 Cesaire Saccopastore\_I\_II Neanderthalensis\_type Nduu Narmada Maba Xuchang Mauer\_1 Arago\_II\_XIII\_XXI\_XLVII Broken\_Hill Petralona\_1 Ceprano Saldanha Bodo Ternifine\_1\_2\_3\_4 Peking\_X\_XII\_XIII\_LII\_RC Nanjing1 Hexian Sambungmacan\_1\_3 Sangiran\_2\_17 Ngandong7\_9\_12 Dmanisi STW53 OH\_9 Turkana\_ER3733\_3883 Habilis\_OH7\_OH24\_ER1805;

constraint aa5 partial =Xiahe Dali Hualongdong Harbin Jinniushan Antecessor Eliye\_Springs Rabat Irhoud\_1\_2 Florisbad Omo\_II LH\_18 Skhul\_V\_IX Qafzeh\_IX Mladec\_I\_II\_V\_VI Cro\_Magnon\_I\_II\_III Oase\_1\_2 ZKD\_UC\_101\_103 Liujiang Tabun\_2 Steinheim : SH4\_5 Tabun\_1 Spy\_I\_II Gibraltar\_1 Amud La\_Chapelle\_aux\_Saints La\_Ferrassie\_1 Shanidar\_1\_5 Cesaire Saccopastore\_I\_II Neanderthalensis\_type Nduu Narmada Maba Xuchang Mauer\_1 Arago\_II\_XIII\_XXI\_XLVII Broken\_Hill Petralona\_1 Ceprano Saldanha Bodo Ternifine\_1\_2\_3\_4 Peking\_X\_XII\_XIII\_LII\_RC Nanjing1 Hexian Sambungmacan\_1\_3 Sangiran\_2\_17 Ngandong7\_9\_12 Dmanisi STW53 OH\_9 Turkana\_ER3733\_3883 Habilis\_OH7\_OH24\_ER1805;

constraint aa6 partial =Mauer\_1 Arago\_II\_XIII\_XXI\_XLVII : Antecessor Eliye\_Springs Rabat Nduu Irhoud\_1\_2 Florisbad Omo\_II LH\_18 Skhul\_V\_IX Qafzeh\_IX Mladec\_I\_II\_V\_VI Cro\_Magnon\_I\_II\_III Oase\_1\_2 ZKD\_UC\_101\_103 Liujiang SH4\_5 Tabun\_1 Tabun\_2 Spy\_I\_II Gibraltar\_1 Amud La\_Chapelle\_aux\_Saints La\_Ferrassie\_1 Shanidar\_1\_5 Cesaire Saccopastore\_I\_II Neanderthalensis\_type Xiahe Dali Hualongdong Harbin Jinniushan Narmada Maba Xuchang Broken\_Hill Petralona\_1 Ceprano Steinheim Saldanha Bodo Ternifine\_1\_2\_3\_4 Peking\_X\_XII\_XIII\_LII\_RC Nanjing1 Hexian Sambungmacan\_1\_3 Sangiran\_2\_17 Ngandong7\_9\_12 Dmanisi STW53 OH\_9 Turkana\_ER3733\_3883 Habilis\_OH7\_OH24\_ER1805;

constraint aa7 partial =Broken\_Hill Petralona\_1 Ceprano Saldanha Bodo : Antecessor Eliye\_Springs Rabat Nduu Irhoud\_1\_2 Florisbad Omo\_II LH\_18 Skhul\_V\_IX Qafzeh\_IX Mladec\_I\_II\_V\_VI Cro\_Magnon\_I\_II\_III Oase\_1\_2 ZKD\_UC\_101\_103 Liujiang SH4\_5 Tabun\_1 Tabun\_2 Spy\_I\_II Gibraltar\_1 Amud La\_Chapelle\_aux\_Saints La\_Ferrassie\_1 Shanidar\_1\_5 Cesaire Saccopastore\_I\_II Neanderthalensis\_type Xiahe Dali Hualongdong Harbin Jinniushan Narmada Maba Xuchang Mauer\_1 Arago\_II\_XIII\_XXI\_XLVII Steinheim Ternifine\_1\_2\_3\_4 Peking\_X\_XII\_XIII\_LII\_RC Nanjing1 Hexian Sambungmacan\_1\_3 Sangiran\_2\_17 Ngandong7\_9\_12 Dmanisi STW53 OH\_9 Turkana\_ER3733\_3883 Habilis\_OH7\_OH24\_ER1805;

constraint aa8 partial =Broken\_Hill Petralona\_1 Ceprano Saldanha Bodo Antecessor Eliye\_Springs Rabat

Ndutu Irhoud\_1\_2 Florisbad Omo\_II LH\_18 Skhul\_V\_IX Qafzeh\_IX Mladec\_I\_II\_V\_VI  
 Cro\_Magnon\_I\_II\_III Oase\_1\_2 ZKD\_UC\_101\_103 Liujiang SH4\_5 Tabun\_1 Tabun\_2 Spy\_I\_II Gibraltar\_1  
 Amud La\_Chapelle\_aux\_Saints La\_Ferrassie\_1 Shanidar\_1\_5 Cesaire Saccopastore\_I\_II  
 Neanderthalensis\_type Xiahe Dali Hualongdong Harbin Jinniushan Narmada Maba Xuchang Mauer\_1  
 Arago\_II\_XIII\_XXI\_XLVII Steinheim : Ternifine\_1\_2\_3\_4 Peking\_X\_XII\_XIII\_LII\_RC Nanjing1 Hexian  
 Sambungmacan\_1\_3 Sangiran\_2\_17 Ngandong7\_9\_12 Dmanisi STW53 OH\_9 Turkana\_ER3733\_3883  
 Habilis\_OH7\_OH24\_ER1805;

constraint aa9 partial =Steinheim Antecessor Eliye\_Springs Rabat Irhoud\_1\_2 Florisbad Omo\_II LH\_18  
 Skhul\_V\_IX Qafzeh\_IX Mladec\_I\_II\_V\_VI Cro\_Magnon\_I\_II\_III Oase\_1\_2 ZKD\_UC\_101\_103 Liujiang  
 SH4\_5 Tabun\_1 Tabun\_2 Spy\_I\_II Gibraltar\_1 Amud La\_Chapelle\_aux\_Saints La\_Ferrassie\_1 Shanidar\_1\_5  
 Cesaire Saccopastore\_I\_II Neanderthalensis\_type Xiahe Dali Hualongdong Harbin Jinniushan : Ndutu Narmada  
 Maba Xuchang Mauer\_1 Arago\_II\_XIII\_XXI\_XLVII Broken\_Hill Petralona\_1 Ceprano Saldanha Bodo  
 Ternifine\_1\_2\_3\_4 Peking\_X\_XII\_XIII\_LII\_RC Nanjing1 Hexian Sambungmacan\_1\_3 Sangiran\_2\_17  
 Ngandong7\_9\_12 Dmanisi STW53 OH\_9 Turkana\_ER3733\_3883 Habilis\_OH7\_OH24\_ER1805;

constraint aa10 partial =Steinheim Antecessor Eliye\_Springs Rabat Irhoud\_1\_2 Florisbad Omo\_II LH\_18  
 Skhul\_V\_IX Qafzeh\_IX Mladec\_I\_II\_V\_VI Cro\_Magnon\_I\_II\_III Oase\_1\_2 ZKD\_UC\_101\_103 Liujiang  
 SH4\_5 Tabun\_1 Tabun\_2 Spy\_I\_II Gibraltar\_1 Amud La\_Chapelle\_aux\_Saints La\_Ferrassie\_1 Shanidar\_1\_5  
 Cesaire Saccopastore\_I\_II Neanderthalensis\_type Xiahe Dali Hualongdong Harbin Jinniushan Ndutu Narmada  
 Maba Xuchang : Mauer\_1 Arago\_II\_XIII\_XXI\_XLVII Broken\_Hill Petralona\_1 Ceprano Saldanha Bodo  
 Ternifine\_1\_2\_3\_4 Peking\_X\_XII\_XIII\_LII\_RC Nanjing1 Hexian Sambungmacan\_1\_3 Sangiran\_2\_17  
 Ngandong7\_9\_12 Dmanisi STW53 OH\_9 Turkana\_ER3733\_3883 Habilis\_OH7\_OH24\_ER1805;

constraint aa11 hard = 2-;

[fossil ages in thousand years ago]

calibrate

Habilis\_OH7\_OH24\_ER1805 = uniform(1780, 1850)

Antecessor = uniform(800, 900)

Narmada = uniform(236, 780)

Eliye\_Springs = uniform(200, 300)

Ndutu = fixed(350)

Irhoud\_1\_2 = uniform(281, 349)

Florisbad = uniform(224, 294)

Omo\_II = fixed(195)

LH\_18 = uniform(120, 150)

Skhul\_V\_IX = fixed(90)

Qafzeh\_IX = fixed(90)

Mladec\_I\_II\_V\_VI = fixed(35)

Cro\_Magnon\_I\_II\_III = fixed(31)

Oase\_1\_2 = uniform(39.41, 41.47)

ZKD\_UC\_101\_103 = fixed(27)

Liujiang = fixed(67)

```

SH4_5 = fixed(430)
Tabun_1 = uniform(100, 122)
Tabun_2 = uniform(100, 122)
Spy_I_II = fixed(40)
Gibraltar_1 = fixed(75)
Amud = fixed(53)
La_Chapelle_aux_Saints = fixed(52)
La_Ferrassie_1 = fixed(70)
Shanidar_1_5 = fixed(50)
Cesaire = uniform(40.66, 41.95)
Saccopastore_I_II = fixed(250)
Neanderthalensis_type = fixed(42)
Xiahe = uniform(155, 164.5)
Dali = uniform(258.3, 267.7)
Hualongdong = uniform(275, 331)
Harbin = uniform(146, 150)
Jinniushan = uniform(200, 310)
Maba = uniform(230, 278)
Xuchang = uniform(105, 125)
Mauer_1 = uniform(569, 649)
Arago_II_XIII_XXI_XLVII = uniform(407, 469)
Broken_Hill = uniform(274, 324)
Petralona_1 = uniform(150, 400)
Ceprano = fixed(850)
Steinheim = fixed(300)
Saldanha = fixed(350)
Bodo = fixed(600)
Ternifine_1_2_3_4 = fixed(750)
Peking_X_XII_XIII_LII_RC = uniform(280, 580)
Nanjing1 = uniform(580, 620)
Hexian = uniform(387, 437)
Sambungmacan_1_3 = fixed(200)
Sangiran_2_17 = uniform(1300, 1500)
Ngandong7_9_12 = uniform(108, 117)
Dmanisi = fixed(1770)
Rabat = fixed(300)
STW53 = fixed(1900)
OH_9 = fixed(1470)
Turkana_ER3733_3883 = uniform(1535, 1780)
;
prset nodeagepr = calibrated;

```

```

[fossilized birth-death tree prior]
prset brlenspr = clock:fossilization;
prset speciationpr = exp(1000);
prset extinctionpr = beta(1, 1);
prset fossilizationpr = beta(1, 1);
prset treeagepr = offsetexp(2800, 3600);
prset topologypr = constraints(1-11);

mcmcpr nruns = 4 nchains = 8 ngen = 100000000 samplefreq = 2000 printfreq = 50000 diagnfr = 500000;
mcmcpr filename = homo relburnin=yes burninfrac=0.3 temp=0.05;

[finetune proposal weights]
propset NNIClock$prob=20;
propset NodesliderClock$prob=40;
propset Multiplier(Clockrate{all})$prob=5;

mcmc;
sump;
sumt output = homo.maj;
sumt output = homo.all contype=allcompat;
End;

```



## Appendix 10. BioGeoBEARS script for model selection and Biogeographical Stochastic Mapping analyses

```
#####  
# Setup  
#####  
library(optimx)  
library(FD)  
  
library(optimx)  
library(FD)  
  
library(cladoRcpp)  
library(BioGeoBEARS)  
  
wd = np("~/Documents/nix/Papers/Harbin_cranium/biogeobears/")  
setwd(wd)  
getwd()  
list.files()  
  
#####  
# DEC  
#####  
BioGeoBEARS_run_object = define_BioGeoBEARS_run()  
trfn="homo.tre"  
geofn="homo_geo_3.txt"  
BioGeoBEARS_run_object$trfn = trfn  
BioGeoBEARS_run_object$geofn = geofn  
BioGeoBEARS_run_object$max_range_size = 3  
BioGeoBEARS_run_object$min_branchlength = 0.000001  
BioGeoBEARS_run_object$include_null_range = TRUE  
BioGeoBEARS_run_object$distsfn = "distances_rescaled_3.txt"  
BioGeoBEARS_run_object$on_NaN_error = -1e50  
BioGeoBEARS_run_object$speedup = TRUE  
BioGeoBEARS_run_object$use_optimx = "GenSA"  
BioGeoBEARS_run_object$num_cores_to_use = 1  
BioGeoBEARS_run_object$force_sparse = FALSE  
  
BioGeoBEARS_run_object = readfiles_BioGeoBEARS_run(BioGeoBEARS_run_object)  
  
BioGeoBEARS_run_object$return_condlikes_table = TRUE  
BioGeoBEARS_run_object$calc_TTL_loglike_from_condlikes_table = TRUE  
BioGeoBEARS_run_object$calc_ancprobs = TRUE
```

```

BioGeoBEARS_run_object
BioGeoBEARS_run_object$BioGeoBEARS_model_object
BioGeoBEARS_run_object$BioGeoBEARS_model_object@params_table
check_BioGeoBEARS_run(BioGeoBEARS_run_object)
results_DEC = bears_optim_run(BioGeoBEARS_run_object)

#####
# DEC+J
#####
BioGeoBEARS_run_object = define_BioGeoBEARS_run()
BioGeoBEARS_run_object$trfn = trfn
BioGeoBEARS_run_object$geogfn = geogfn
BioGeoBEARS_run_object$max_range_size = 3
BioGeoBEARS_run_object$min_branchlength = 0.000001
BioGeoBEARS_run_object$include_null_range = TRUE
BioGeoBEARS_run_object$distsfn = "distances_rescaled_3.txt"

BioGeoBEARS_run_object$on_NaN_error = -1e50
BioGeoBEARS_run_object$speedup = TRUE
BioGeoBEARS_run_object$use_optimx = "GenSA"
BioGeoBEARS_run_object$num_cores_to_use = 1
BioGeoBEARS_run_object$force_sparse = FALSE

BioGeoBEARS_run_object = readfiles_BioGeoBEARS_run(BioGeoBEARS_run_object)

BioGeoBEARS_run_object$return_condlikes_table = TRUE
BioGeoBEARS_run_object$calc_TTL_loglike_from_condlikes_table = TRUE
BioGeoBEARS_run_object$calc_ancprobs = TRUE

dstart = results_DEC$outputs@params_table["d","est"]
estart = results_DEC$outputs@params_table["e","est"]
jstart = 0.0001

BioGeoBEARS_run_object$BioGeoBEARS_model_object@params_table["d","init"] = dstart
BioGeoBEARS_run_object$BioGeoBEARS_model_object@params_table["d","est"] = dstart
BioGeoBEARS_run_object$BioGeoBEARS_model_object@params_table["e","init"] = estart
BioGeoBEARS_run_object$BioGeoBEARS_model_object@params_table["e","est"] = estart
BioGeoBEARS_run_object$BioGeoBEARS_model_object@params_table["j","type"] = "free"
BioGeoBEARS_run_object$BioGeoBEARS_model_object@params_table["j","init"] = jstart
BioGeoBEARS_run_object$BioGeoBEARS_model_object@params_table["j","est"] = jstart

```

```

check_BioGeoBEARS_run(BioGeoBEARS_run_object)
results_DEC_J = bears_optim_run(BioGeoBEARS_run_object)

#####
# DIVALIKE
#####
BioGeoBEARS_run_object = define_BioGeoBEARS_run()
BioGeoBEARS_run_object$trfn = trfn
BioGeoBEARS_run_object$geogfn = geofn
BioGeoBEARS_run_object$max_range_size = 3
BioGeoBEARS_run_object$min_branchlength = 0.000001
BioGeoBEARS_run_object$include_null_range = TRUE

BioGeoBEARS_run_object$distsfn = "distances_rescaled_3.txt"

BioGeoBEARS_run_object$on_NaN_error = -1e50
BioGeoBEARS_run_object$speedup = TRUE
BioGeoBEARS_run_object$use_optimx = "GenSA"
BioGeoBEARS_run_object$num_cores_to_use = 1
BioGeoBEARS_run_object$force_sparse = FALSE

BioGeoBEARS_run_object = readfiles_BioGeoBEARS_run(BioGeoBEARS_run_object)

BioGeoBEARS_run_object$return_condlikes_table = TRUE
BioGeoBEARS_run_object$calc_TTL_loglike_from_condlikes_table = TRUE
BioGeoBEARS_run_object$calc_ancprobs = TRUE

BioGeoBEARS_run_object$BioGeoBEARS_model_object@params_table["s","type"] = "fixed"
BioGeoBEARS_run_object$BioGeoBEARS_model_object@params_table["s","init"] = 0.0
BioGeoBEARS_run_object$BioGeoBEARS_model_object@params_table["s","est"] = 0.0

BioGeoBEARS_run_object$BioGeoBEARS_model_object@params_table["ysv","type"] = "2-j"
BioGeoBEARS_run_object$BioGeoBEARS_model_object@params_table["ys","type"] = "ysv*1/2"
BioGeoBEARS_run_object$BioGeoBEARS_model_object@params_table["y","type"] = "ysv*1/2"
BioGeoBEARS_run_object$BioGeoBEARS_model_object@params_table["v","type"] = "ysv*1/2"

BioGeoBEARS_run_object$BioGeoBEARS_model_object@params_table["mx01v","type"] = "fixed"
BioGeoBEARS_run_object$BioGeoBEARS_model_object@params_table["mx01v","init"] = 0.5
BioGeoBEARS_run_object$BioGeoBEARS_model_object@params_table["mx01v","est"] = 0.5

```

```

check_BioGeoBEARS_run(BioGeoBEARS_run_object)
results_DIVALIKE = bears_optim_run(BioGeoBEARS_run_object)

#####
#DIVALIKE+J
#####
BioGeoBEARS_run_object = define_BioGeoBEARS_run()
BioGeoBEARS_run_object$trfn = trfn
BioGeoBEARS_run_object$geogfn = geogfn
BioGeoBEARS_run_object$max_range_size = 3
BioGeoBEARS_run_object$min_branchlength = 0.000001
BioGeoBEARS_run_object$include_null_range = TRUE

BioGeoBEARS_run_object$distsfn = "distances_rescaled_3.txt"

BioGeoBEARS_run_object$on_NaN_error = -1e50
BioGeoBEARS_run_object$speedup = TRUE
BioGeoBEARS_run_object$use_optimx = "GenSA"
BioGeoBEARS_run_object$num_cores_to_use = 1
BioGeoBEARS_run_object$force_sparse = FALSE

BioGeoBEARS_run_object = readfiles_BioGeoBEARS_run(BioGeoBEARS_run_object)

BioGeoBEARS_run_object$return_condlikes_table = TRUE
BioGeoBEARS_run_object$calc_TTL_loglike_from_condlikes_table = TRUE
BioGeoBEARS_run_object$calc_ancprobs = TRUE

dstart = results_DIVALIKE$outputs@params_table["d","est"]
estart = results_DIVALIKE$outputs@params_table["e","est"]
jstart = 0.0001

BioGeoBEARS_run_object$BioGeoBEARS_model_object@params_table["d","init"] = dstart
BioGeoBEARS_run_object$BioGeoBEARS_model_object@params_table["d","est"] = dstart
BioGeoBEARS_run_object$BioGeoBEARS_model_object@params_table["e","init"] = estart
BioGeoBEARS_run_object$BioGeoBEARS_model_object@params_table["e","est"] = estart

BioGeoBEARS_run_object$BioGeoBEARS_model_object@params_table["s","type"] = "fixed"
BioGeoBEARS_run_object$BioGeoBEARS_model_object@params_table["s","init"] = 0.0
BioGeoBEARS_run_object$BioGeoBEARS_model_object@params_table["s","est"] = 0.0

BioGeoBEARS_run_object$BioGeoBEARS_model_object@params_table["ysv","type"] = "2-j"

```

```

BioGeoBEARS_run_object$BioGeoBEARS_model_object@params_table["ys","type"] = "ysv*1/2"
BioGeoBEARS_run_object$BioGeoBEARS_model_object@params_table["y","type"] = "ysv*1/2"
BioGeoBEARS_run_object$BioGeoBEARS_model_object@params_table["v","type"] = "ysv*1/2"

BioGeoBEARS_run_object$BioGeoBEARS_model_object@params_table["mx01v","type"] = "fixed"
BioGeoBEARS_run_object$BioGeoBEARS_model_object@params_table["mx01v","init"] = 0.5
BioGeoBEARS_run_object$BioGeoBEARS_model_object@params_table["mx01v","est"] = 0.5

BioGeoBEARS_run_object$BioGeoBEARS_model_object@params_table["j","type"] = "free"
BioGeoBEARS_run_object$BioGeoBEARS_model_object@params_table["j","init"] = jstart
BioGeoBEARS_run_object$BioGeoBEARS_model_object@params_table["j","est"] = jstart

BioGeoBEARS_run_object$BioGeoBEARS_model_object@params_table["j","min"] = 0.00001
BioGeoBEARS_run_object$BioGeoBEARS_model_object@params_table["j","max"] = 1.99999

check_BioGeoBEARS_run(BioGeoBEARS_run_object)
results_DIVALIKE_J = bears_optim_run(BioGeoBEARS_run_object)

#####
# BAYAREALIKE
#####

BioGeoBEARS_run_object = define_BioGeoBEARS_run()
BioGeoBEARS_run_object$trfn = trfn
BioGeoBEARS_run_object$geogfn = geogfn
BioGeoBEARS_run_object$max_range_size = 3
BioGeoBEARS_run_object$min_branchlength = 0.000001
BioGeoBEARS_run_object$include_null_range = TRUE

BioGeoBEARS_run_object$distsfn = "distances_rescaled_3.txt"

BioGeoBEARS_run_object$on_NaN_error = -1e50
BioGeoBEARS_run_object$speedup = TRUE
BioGeoBEARS_run_object$use_optimx = "GenSA"
BioGeoBEARS_run_object$num_cores_to_use = 1
BioGeoBEARS_run_object$force_sparse = FALSE

BioGeoBEARS_run_object = readfiles_BioGeoBEARS_run(BioGeoBEARS_run_object)

BioGeoBEARS_run_object$return_condlikes_table = TRUE
BioGeoBEARS_run_object$calc_TTL_loglike_from_condlikes_table = TRUE
BioGeoBEARS_run_object$calc_ancprobs = TRUE

```

```

BioGeoBEARS_run_object$BioGeoBEARS_model_object@params_table["s","type"] = "fixed"
BioGeoBEARS_run_object$BioGeoBEARS_model_object@params_table["s","init"] = 0.0
BioGeoBEARS_run_object$BioGeoBEARS_model_object@params_table["s","est"] = 0.0
BioGeoBEARS_run_object$BioGeoBEARS_model_object@params_table["v","type"] = "fixed"
BioGeoBEARS_run_object$BioGeoBEARS_model_object@params_table["v","init"] = 0.0
BioGeoBEARS_run_object$BioGeoBEARS_model_object@params_table["v","est"] = 0.0
BioGeoBEARS_run_object$BioGeoBEARS_model_object@params_table["ysv","type"] = "1-j"
BioGeoBEARS_run_object$BioGeoBEARS_model_object@params_table["ys","type"] = "ysv*1/1"
BioGeoBEARS_run_object$BioGeoBEARS_model_object@params_table["y","type"] = "1-j"
BioGeoBEARS_run_object$BioGeoBEARS_model_object@params_table["mx01y","type"] = "fixed"
BioGeoBEARS_run_object$BioGeoBEARS_model_object@params_table["mx01y","init"] = 0.9999
BioGeoBEARS_run_object$BioGeoBEARS_model_object@params_table["mx01y","est"] = 0.9999

```

```

check_BioGeoBEARS_run(BioGeoBEARS_run_object)
results_BAYAREALIKE = bears_optim_run(BioGeoBEARS_run_object)

```

```
#####
```

```
# BAYAREALIKE+J
```

```
#####
```

```

BioGeoBEARS_run_object = define_BioGeoBEARS_run()
BioGeoBEARS_run_object$trfn = trfn
BioGeoBEARS_run_object$geogfn = geogfn
BioGeoBEARS_run_object$max_range_size = 3
BioGeoBEARS_run_object$min_branchlength = 0.000001
BioGeoBEARS_run_object$include_null_range = TRUE

```

```
BioGeoBEARS_run_object$distsfn = "distances_rescaled_3.txt"
```

```

BioGeoBEARS_run_object$on_NaN_error = -1e50
BioGeoBEARS_run_object$speedup = TRUE
BioGeoBEARS_run_object$suse_optimx = "GenSA"
BioGeoBEARS_run_object$num_cores_to_use = 1
BioGeoBEARS_run_object$force_sparse = FALSE

```

```
BioGeoBEARS_run_object = readfiles_BioGeoBEARS_run(BioGeoBEARS_run_object)
```

```

BioGeoBEARS_run_object$return_condlikes_table = TRUE
BioGeoBEARS_run_object$calc_TTL_loglike_from_condlikes_table = TRUE
BioGeoBEARS_run_object$calc_ancprobs = TRUE

```

```
dstart = results_BAYAREALIKE$outputs@params_table["d","est"]
estart = results_BAYAREALIKE$outputs@params_table["e","est"]
jstart = 0.0001
```

```
BioGeoBEARS_run_object$BioGeoBEARS_model_object@params_table["d","init"] = dstart
BioGeoBEARS_run_object$BioGeoBEARS_model_object@params_table["d","est"] = dstart
BioGeoBEARS_run_object$BioGeoBEARS_model_object@params_table["e","init"] = estart
BioGeoBEARS_run_object$BioGeoBEARS_model_object@params_table["e","est"] = estart
```

```
BioGeoBEARS_run_object$BioGeoBEARS_model_object@params_table["s","type"] = "fixed"
BioGeoBEARS_run_object$BioGeoBEARS_model_object@params_table["s","init"] = 0.0
BioGeoBEARS_run_object$BioGeoBEARS_model_object@params_table["s","est"] = 0.0
```

```
BioGeoBEARS_run_object$BioGeoBEARS_model_object@params_table["v","type"] = "fixed"
BioGeoBEARS_run_object$BioGeoBEARS_model_object@params_table["v","init"] = 0.0
BioGeoBEARS_run_object$BioGeoBEARS_model_object@params_table["v","est"] = 0.0
```

```
BioGeoBEARS_run_object$BioGeoBEARS_model_object@params_table["j","type"] = "free"
BioGeoBEARS_run_object$BioGeoBEARS_model_object@params_table["j","init"] = jstart
BioGeoBEARS_run_object$BioGeoBEARS_model_object@params_table["j","est"] = jstart
```

```
BioGeoBEARS_run_object$BioGeoBEARS_model_object@params_table["j","max"] = 0.99999
```

```
BioGeoBEARS_run_object$BioGeoBEARS_model_object@params_table["ysv","type"] = "1-j"
BioGeoBEARS_run_object$BioGeoBEARS_model_object@params_table["ys","type"] = "ysv*1/1"
BioGeoBEARS_run_object$BioGeoBEARS_model_object@params_table["y","type"] = "1-j"
```

```
BioGeoBEARS_run_object$BioGeoBEARS_model_object@params_table["mx01y","type"] = "fixed"
BioGeoBEARS_run_object$BioGeoBEARS_model_object@params_table["mx01y","init"] = 0.9999
BioGeoBEARS_run_object$BioGeoBEARS_model_object@params_table["mx01y","est"] = 0.9999
```

```
BioGeoBEARS_run_object$BioGeoBEARS_model_object@params_table["d","min"] = 0.0000001
BioGeoBEARS_run_object$BioGeoBEARS_model_object@params_table["d","max"] = 4.9999999
```

```
BioGeoBEARS_run_object$BioGeoBEARS_model_object@params_table["e","min"] = 0.0000001
BioGeoBEARS_run_object$BioGeoBEARS_model_object@params_table["e","max"] = 4.9999999
```

```
BioGeoBEARS_run_object$BioGeoBEARS_model_object@params_table["j","min"] = 0.00001
BioGeoBEARS_run_object$BioGeoBEARS_model_object@params_table["j","max"] = 0.99999
```

```
check_BioGeoBEARS_run(BioGeoBEARS_run_object)
```

```

results_BAYAREALIKE_J = bears_optim_run(BioGeoBEARS_run_object)

#####
# CALCULATE SUMMARY STATISTICS TO COMPARE
# DEC, DEC+J, DIVALIKE, DIVALIKE+J, BAYAREALIKE,
# BAYAREALIKE+J
#####

restable = NULL
teststable = NULL
tr = read.tree(trfn)

#####
# Statistics -- DEC vs. DEC+J
#####
# We have to extract the log-likelihood differently, depending on the
# version of optim/optimx
LnL_2 = get_LnL_from_BioGeoBEARS_results_object(results_DEC)
LnL_1 = get_LnL_from_BioGeoBEARS_results_object(results_DEC_J)

numparams1 = 3
numparams2 = 2
stats = AICstats_2models(LnL_1, LnL_2, numparams1, numparams2)
stats

# DEC, null model for Likelihood Ratio Test (LRT)
res2 = extract_params_from_BioGeoBEARS_results_object(results_object=results_DEC, returnwhat="table",
addl_params=c("j"), paramsstr_digits=4)
# DEC+J, alternative model for Likelihood Ratio Test (LRT)
res1 = extract_params_from_BioGeoBEARS_results_object(results_object=results_DEC_J, returnwhat="table",
addl_params=c("j"), paramsstr_digits=4)

# The null hypothesis for a Likelihood Ratio Test (LRT) is that two models
# confer the same likelihood on the data. See: Brian O'Meara's webpage:
# http://www.brianomeara.info/tutorials/aic
# ...for an intro to LRT, AIC, and AICc

rbind(res2, res1)
tmp_tests = conditional_format_table(stats)

```



```

restable = rbind(restable, res2, res1)
teststable = rbind(teststable, tmp_tests)

#####
# Statistics -- DIVALIKE vs. DIVALIKE+J
#####
# We have to extract the log-likelihood differently, depending on the
# version of optim/optimx
LnL_2 = get_LnL_from_BioGeoBEARS_results_object(results_DIVALIKE)
LnL_1 = get_LnL_from_BioGeoBEARS_results_object(results_DIVALIKE_J)

numparams1 = 3
numparams2 = 2
stats = AICstats_2models(LnL_1, LnL_2, numparams1, numparams2)
stats

# DIVALIKE, null model for Likelihood Ratio Test (LRT)
res2 = extract_params_from_BioGeoBEARS_results_object(results_object=results_DIVALIKE, returnwhat="table",
addl_params=c("j"), paramsstr_digits=4)
# DIVALIKE+J, alternative model for Likelihood Ratio Test (LRT)
res1 = extract_params_from_BioGeoBEARS_results_object(results_object=results_DIVALIKE_J,
returnwhat="table", addl_params=c("j"), paramsstr_digits=4)

rbind(res2, res1)
conditional_format_table(stats)

tmp_tests = conditional_format_table(stats)

restable = rbind(restable, res2, res1)
teststable = rbind(teststable, tmp_tests)

#####
# Statistics -- BAYAREALIKE vs. BAYAREALIKE+J
#####
# We have to extract the log-likelihood differently, depending on the
# version of optim/optimx
LnL_2 = get_LnL_from_BioGeoBEARS_results_object(results_BAYAREALIKE)
LnL_1 = get_LnL_from_BioGeoBEARS_results_object(results_BAYAREALIKE_J)

numparams1 = 3
numparams2 = 2

```

```

stats = AICstats_2models(LnL_1, LnL_2, numparams1, numparams2)
stats

# BAYAREALIKE, null model for Likelihood Ratio Test (LRT)
res2      =      extract_params_from_BioGeoBEARS_results_object(results_object=results_BAYAREALIKE,
returnwhat="table", addl_params=c("j"), paramsstr_digits=4)
# BAYAREALIKE+J, alternative model for Likelihood Ratio Test (LRT)
res1      =      extract_params_from_BioGeoBEARS_results_object(results_object=results_BAYAREALIKE_J,
returnwhat="table", addl_params=c("j"), paramsstr_digits=4)

rbind(res2, res1)
conditional_format_table(stats)

tmp_tests = conditional_format_table(stats)

restable = rbind(restable, res2, res1)
teststable = rbind(teststable, tmp_tests)

#####
# ASSEMBLE RESULTS TABLES: DEC, DEC+J, DIVALIKE, DIVALIKE+J, BAYAREALIKE,
# BAYAREALIKE+J
#####
teststable$alt = c("DEC+J", "DIVALIKE+J", "BAYAREALIKE+J")
teststable$null = c("DEC", "DIVALIKE", "BAYAREALIKE")
row.names(restable) = c("DEC", "DEC+J", "DIVALIKE", "DIVALIKE+J", "BAYAREALIKE",
"BAYAREALIKE+J")
restable = put_jcol_after_ecol(restable)
restable

# Look at the results!!
restable
teststable

#####
# Save the results tables for later -- check for e.g.
# convergence issues
#####

# Loads to "restable"
save(restable, file="restable_v1.Rdata")
load(file="restable_v1.Rdata")

```

```

# Loads to "teststable"
save(teststable, file="teststable_v1.Rdata")
load(file="teststable_v1.Rdata")

# Also save to text files
write.table(restable, file="restable.txt", quote=FALSE, sep="\t")
write.table(unlist_df(teststable), file="teststable.txt", quote=FALSE, sep="\t")

#####
# Model weights of all six models
#####
restable2 = restable

# With AICs:
AICtable = calc_AIC_column(LnL_vals=restable$LnL, nparam_vals=restable$numparams)
restable = cbind(restable, AICtable)
restable_AIC_rellike = AkaikeWeights_on_summary_table(restable=restable, colname_to_use="AIC")
restable_AIC_rellike = put_jcol_after_ecol(restable_AIC_rellike)
restable_AIC_rellike

# With AICcs -- factors in sample size
samplesize = length(tr$tip.label)
AICtable = calc_AICc_column(LnL_vals=restable$LnL, nparam_vals=restable$numparams, samplesize=samplesize)
restable2 = cbind(restable2, AICtable)
restable_AICc_rellike = AkaikeWeights_on_summary_table(restable=restable2, colname_to_use="AICc")
restable_AICc_rellike = put_jcol_after_ecol(restable_AICc_rellike)
restable_AICc_rellike

# Also save to text files
write.table(restable_AIC_rellike, file="restable_AIC_rellike.txt", quote=FALSE, sep="\t")
write.table(restable_AICc_rellike, file="restable_AICc_rellike.txt", quote=FALSE, sep="\t")

# Save with nice conditional formatting
write.table(conditional_format_table(restable_AIC_rellike),           file="restable_AIC_rellike_formatted.txt",
quote=FALSE, sep="\t")
write.table(conditional_format_table(restable_AICc_rellike),       file="restable_AICc_rellike_formatted.txt",
quote=FALSE, sep="\t")

restable

```

```

teststable

#####
# Biogeographical Stochastic Mapping (BSM)
# — run AFTER basic example script
#####
model_name = "DEC+J"
res = results_DEC_J
tipranges = getranges_from_LagrangePHYLIP(lgdata_fn=geofn)

pdffn = paste0("Homo_", model_name, "_v1.pdf")
pdf(pdffn, width=6, height=6)

analysis_titletxt = paste0(model_name, " on Homo")

# Setup
results_object = res
scriptdir = np(system.file("extdata/a_scripts", package="BioGeoBEARS"))

# States
res2 = plot_BioGeoBEARS_results(results_object, analysis_titletxt, addl_params=list("j"), plotwhat="text",
label.offset=0.45, tipcex=0.7, statecex=0.7, splitcex=0.6, titlecex=0.8, plotsplits=TRUE, cornercoords_loc=scriptdir,
include_null_range=TRUE, tr=tr, tipranges=tipranges)

# Pie chart
plot_BioGeoBEARS_results(results_object, analysis_titletxt, addl_params=list("j"), plotwhat="pie",
label.offset=0.45, tipcex=0.7, statecex=0.7, splitcex=0.6, titlecex=0.8, plotsplits=TRUE, cornercoords_loc=scriptdir,
include_null_range=TRUE, tr=tr, tipranges=tipranges)

dev.off() # Turn off PDF
cmdstr = paste("open ", pdffn, sep="")
system(cmdstr) # Plot it

# Stochastic mapping on DEC+J
clado_events_tables = NULL
ana_events_tables = NULL
lnum = 0

#Get the inputs for Biogeographical Stochastic Mapping

BSM_inputs_fn = "BSM_inputs_file.Rdata"

```

```

runInputsSlow = TRUE
if (runInputsSlow)
  {
    stochastic_mapping_inputs_list = get_inputs_for_stochastic_mapping(res=res)
    save(stochastic_mapping_inputs_list, file=BSM_inputs_fn)
  } else {
    # Loads to "stochastic_mapping_inputs_list"
    load(BSM_inputs_fn)
  } # END if (runInputsSlow)

# Check inputs (doesn't work the same on unconstr)
names(stochastic_mapping_inputs_list)
stochastic_mapping_inputs_list$phy2
stochastic_mapping_inputs_list$SCOO_weights_columnar
stochastic_mapping_inputs_list$unconstr
set.seed(seed=as.numeric(Sys.time()))

runBSMslow = TRUE
if (runBSMslow == TRUE)
  {
    # Saves to: RES_clado_events_tables.Rdata
    # Saves to: RES_ana_events_tables.Rdata
    BSM_output = runBSM(res, stochastic_mapping_inputs_list=stochastic_mapping_inputs_list,
maxnum_maps_to_try=200, nummaps_goal=100, maxtries_per_branch=40000, save_after_every_try=TRUE,
savedir=getwd(), seedval=12345, wait_before_save=0.01)

    RES_clado_events_tables = BSM_output$RES_clado_events_tables
    RES_ana_events_tables = BSM_output$RES_ana_events_tables
  } else {
    # Load previously saved...

    # Loads to: RES_clado_events_tables
    load(file="RES_clado_events_tables.Rdata")
    # Loads to: RES_ana_events_tables
    load(file="RES_ana_events_tables.Rdata")
    BSM_output = NULL
    BSM_output$RES_clado_events_tables = RES_clado_events_tables
    BSM_output$RES_ana_events_tables = RES_ana_events_tables
  } # END if (runBSMslow == TRUE)

# Extract BSM output

```

```

clado_events_tables = BSM_output$RES_clado_events_tables
ana_events_tables = BSM_output$RES_ana_events_tables
head(clado_events_tables[[1]])
head(ana_events_tables[[1]])
length(clado_events_tables)
length(ana_events_tables)

include_null_range = TRUE
areanames = names(tipranges@df)
areas = areanames
max_range_size = 3

states_list_0based = rcpp_areas_list_to_states_list(areas=areas, maxareas=max_range_size,
include_null_range=include_null_range)
colors_list_for_states = get_colors_for_states_list_0based(areanames=areanames,
states_list_0based=states_list_0based, max_range_size=max_range_size, plot_null_range=TRUE)

#####
# Summarize stochastic map tables
#####
length(clado_events_tables)
length(ana_events_tables)

head(clado_events_tables[[1]][,-20])
tail(clado_events_tables[[1]][,-20])

head(ana_events_tables[[1]])
tail(ana_events_tables[[1]])

areanames = names(tipranges@df)
actual_names = areanames
actual_names

# Get the dmat and times (if any)
dmat_times = get_dmat_times_from_res(res=res, numstates=NULL)
dmat_times

# Extract BSM output
clado_events_tables = BSM_output$RES_clado_events_tables
ana_events_tables = BSM_output$RES_ana_events_tables

```

```

# Simulate the source areas
BSMs_w_sourceAreas = simulate_source_areas_ana_clado(res, clado_events_tables, ana_events_tables, areanames)
clado_events_tables = BSMs_w_sourceAreas$clado_events_tables
ana_events_tables = BSMs_w_sourceAreas$ana_events_tables

# Count all anagenetic and cladogenetic events
counts_list = count_ana_clado_events(clado_events_tables, ana_events_tables, areanames, actual_names)

summary_counts_BSMs = counts_list$summary_counts_BSMs
print(conditional_format_table(summary_counts_BSMs))

# Histogram of event counts
hist_event_counts(counts_list, pdffn=paste0(model_name, "_histograms_of_event_counts.pdf"))

#####
# Print counts to files
#####
tmpnames = names(counts_list)
cat("\n\nWriting tables* of counts to tab-delimited text files:\n(* = Tables have dimension=2 (rows and columns).
Cubes (dimension 3) and lists (dimension 1) will not be printed to text files.) \n\n")
for (i in 1:length(tmpnames))
  {
    cmdtxt = paste0("item = counts_list$", tmpnames[i])
    eval(parse(text=cmdtxt))

# Skip cubes
if (length(dim(item)) != 2)
  {
    next()
  }

outfn = paste0(tmpnames[i], ".txt")
if (length(item) == 0)
  {
    cat(outfn, "-- NOT written, *NO* events recorded of this type", sep="")
    cat("\n")
  } else {
    cat(outfn)
    cat("\n")
    write.table(conditional_format_table(item), file=outfn, quote=FALSE, sep="\t", col.names=TRUE,
row.names=TRUE)

```

```

    } # END if (length(item) == 0)
  } # END for (i in 1:length(tmpnames))
cat("...done.\n")

#####
# Check that ML ancestral state/range probabilities and
# the mean of the BSMs approximately line up
#####
library(MultinomialCI) # For 95% CIs on BSM counts
check_ML_vs_BSM(res, clado_events_tables, model_name, tr=NULL, plot_each_node=FALSE, linreg_plot=TRUE,
MultinomialCI=TRUE)

#####
# Plot tree on map
#####
library(phytools)
library(phangorn)
library(plotrix)
setwd("~/Documents/nix/Papers/Harbin_man/biogeobears/")
getwd()
list.files()
trfn="homo.tre"
tr = read.tree(trfn)
tr$tip.label
library(ape)
library(phytools)
coords<-read.table("geography.txt", header=TRUE, row.names=1)
coords
lat<-as.matrix(coords)[, 1]
long<-as.matrix(coords)[, 2]
xx <- phylo.to.map(tr, cbind(lat, long), rotate = FALSE, plot = FALSE)
tmp<-read.table("colors.txt", header=TRUE, row.names=1)
colors<-matrix (tmp$color_code, nrow(coords),2,dimnames=list(rownames(coords)))
colors
plot(xx,ftype="off",lwd=c(1.25,0.5), xlim=c(-10,160), ylim=c(-50,100),colors=colors,lty="solid")

#####
#####

```
